# Supplementary material for: Urinary proteome comparison in modified electroconvulsive therapy in depression disorder：new approach in the therapeutic mechanism
Source: Research Square preprint supplement (doi:10.21203/rs.3.rs-6664029/v1), 2025-05-23
Supplement: Supplementary file 1 [file 3066044db86821dd72703cbc.xlsx]

## Sheet: A
Biological process by GO analysis distribute in patients (P <0.05)
Names		total	elements
1_adjust 2_adjust 3_adjust 4 5_adjust 6 7_adjust 8 9_adjust	9	3	cell adhesion
			carbohydrate metabolic process
			aging
1_adjust 2_adjust 3_adjust 4 5_adjust 6 7_adjust 9_adjust	8	1	cell-cell adhesion
1_adjust 2_adjust 3_adjust 4 5_adjust 6 8 9_adjust		2	cell-cell adhesion via plasma-membrane adhesion molecules
			negative regulation of endopeptidase activity
1_adjust 2_adjust 3_adjust 4 5_adjust 7_adjust 8 9_adjust		1	proteolysis
1_adjust 2_adjust 3_adjust 5_adjust 6 7_adjust 8 9_adjust		2	cell-matrix adhesion
			angiogenesis
1_adjust 2_adjust 4 5_adjust 6 7_adjust 8 9_adjust		1	positive regulation of tumor necrosis factor production
1_adjust 2_adjust 3_adjust 4 5_adjust 6 8	7	1	innate immune response
1_adjust 2_adjust 3_adjust 4 5_adjust 6 9_adjust		3	axon guidance
			multicellular organism development
			homophilic cell adhesion via plasma membrane adhesion molecules
1_adjust 2_adjust 3_adjust 4 5_adjust 8 9_adjust		3	response to ethanol
			blood coagulation
			epithelial cell differentiation
1_adjust 2_adjust 3_adjust 5_adjust 6 7_adjust 9_adjust		1	heterophilic cell-cell adhesion via plasma membrane cell adhesion molecules
1_adjust 2_adjust 3_adjust 5_adjust 6 8 9_adjust		4	leukocyte cell-cell adhesion
			viral entry into host cell
			inflammatory response
			positive regulation of cell migration
1_adjust 2_adjust 3_adjust 5_adjust 7_adjust 8 9_adjust		2	antibacterial humoral response
			antimicrobial humoral immune response mediated by antimicrobial peptide
1_adjust 2_adjust 3_adjust 6 7_adjust 8 9_adjust		1	positive regulation of peptidyl-tyrosine phosphorylation
2_adjust 3_adjust 5_adjust 6 7_adjust 8 9_adjust		3	signal transduction
			endocytosis
			cell migration
1_adjust 2_adjust 3_adjust 5_adjust 6 9_adjust	6	4	regulation of blood pressure
			peptide cross-linking
			glycosaminoglycan catabolic process
			substrate adhesion-dependent cell spreading
1_adjust 2_adjust 3_adjust 5_adjust 8 9_adjust		5	platelet aggregation
			response to oxidative stress
			receptor-mediated endocytosis
			response to mechanical stimulus
			response to hydrogen peroxide
1_adjust 2_adjust 4 5_adjust 6 9_adjust		1	adherens junction organization
1_adjust 2_adjust 4 5_adjust 8 9_adjust		1	complement activation, classical pathway
1_adjust 2_adjust 5_adjust 6 8 9_adjust		1	acute-phase response
1_adjust 2_adjust 5_adjust 7_adjust 8 9_adjust		1	defense response to Gram-positive bacterium
1_adjust 5_adjust 6 7_adjust 8 9_adjust		1	positive regulation of nitric oxide biosynthetic process
2_adjust 3_adjust 5_adjust 6 8 9_adjust		4	retina homeostasis
			protein stabilization
			extracellular matrix organization
			response to calcium ion
2_adjust 3_adjust 5_adjust 7_adjust 8 9_adjust		1	animal organ regeneration
1_adjust 2_adjust 3_adjust 5_adjust 8		3	basement membrane organization
			positive regulation of heterotypic cell-cell adhesion
			collagen fibril organization
1_adjust 2_adjust 3_adjust 5_adjust 9_adjust		11	keratinocyte differentiation
			nucleosome assembly
			protein localization to CENP-A containing chromatin
			DNA replication-independent nucleosome assembly
			ossification
			telomere organization
			DNA replication-dependent nucleosome assembly
			intermediate filament organization
			response to lipopolysaccharide
			DNA-templated transcription, initiation
			negative regulation of megakaryocyte differentiation
1_adjust 2_adjust 3_adjust 8 9_adjust		1	complement activation, alternative pathway
1_adjust 2_adjust 5_adjust 8 9_adjust		2	glycolytic process
			fibrinolysis
1_adjust 3_adjust 5_adjust 8 9_adjust		1	positive regulation of cell death
1_adjust 5_adjust 6 8 9_adjust		1	response to estradiol
2_adjust 3_adjust 5_adjust 6 8		1	regulation of cell adhesion
2_adjust 3_adjust 5_adjust 6 9_adjust		13	negative regulation of ryanodine-sensitive calcium-release channel activity
			positive regulation of DNA binding
			positive regulation of nitric-oxide synthase activity
			positive regulation of phosphoprotein phosphatase activity
			negative regulation of calcium ion transmembrane transporter activity
			wound healing
			establishment of protein localization to mitochondrial membrane
			epidermis development
			positive regulation of cyclic-nucleotide phosphodiesterase activity
			negative regulation of calcium ion export from cell
			positive regulation of ryanodine-sensitive calcium-release channel activity
			regulation of cell communication by electrical coupling involved in cardiac conduction
			regulation of high voltage-gated calcium channel activity
2_adjust 3_adjust 5_adjust 8 9_adjust		5	receptor internalization
			cellular oxidant detoxification
			positive regulation of NF-kappaB transcription factor activity
			hydrogen peroxide catabolic process
			negative regulation of apoptotic process
2_adjust 3_adjust 6 7_adjust 8		1	astrocyte activation involved in immune response
2_adjust 3_adjust 6 8 9_adjust		1	endodermal cell differentiation
2_adjust 3_adjust 7_adjust 8 9_adjust		1	positive regulation of inflammatory response
3_adjust 5_adjust 6 8 9_adjust		1	positive regulation of protein dephosphorylation
1_adjust 2_adjust 3_adjust 5_adjust		1	negative regulation of fibrinolysis
1_adjust 2_adjust 3_adjust 9_adjust		1	axon regeneration
1_adjust 2_adjust 5_adjust 7_adjust		1	negative regulation of neuron projection development
1_adjust 2_adjust 5_adjust 9_adjust		1	defense response to Gram-negative bacterium
1_adjust 2_adjust 7_adjust 9_adjust		2	positive regulation of cell activation
			positive regulation of protein tyrosine kinase activity
1_adjust 5_adjust 6 9_adjust		1	positive regulation of protein serine/threonine kinase activity
1_adjust 5_adjust 8 9_adjust		8	positive regulation of substrate adhesion-dependent cell spreading
			protein folding
			protein polymerization
			proteasomal ubiquitin-independent protein catabolic process
			proteasomal protein catabolic process
			glomerular filtration
			platelet activation
			response to drug
1_adjust 7_adjust 8 9_adjust		1	positive regulation of ERK1 and ERK2 cascade
2_adjust 3_adjust 5_adjust 6		1	antigen processing and presentation of exogenous peptide antigen via MHC class II
2_adjust 3_adjust 5_adjust 7_adjust		2	regulation of heart rate by cardiac conduction
			bundle of His cell-Purkinje myocyte adhesion involved in cell communication
2_adjust 3_adjust 5_adjust 9_adjust		6	keratinization
			defense response to fungus
			positive regulation of kinase activity
			positive regulation of collagen biosynthetic process
			positive regulation of canonical Wnt signaling pathway
			complement activation
2_adjust 3_adjust 6 8		1	positive regulation of wound healing
2_adjust 3_adjust 6 9_adjust		3	response to yeast
			regulation of synaptic vesicle endocytosis
			negative regulation of T cell proliferation
2_adjust 3_adjust 7_adjust 8		1	positive regulation of MAPK cascade
2_adjust 3_adjust 7_adjust 9_adjust		1	response to peptide hormone
2_adjust 3_adjust 8 9_adjust		4	positive regulation of MAP kinase activity
			positive regulation of protein phosphorylation
			oxygen transport
			phagocytosis
2_adjust 4 5_adjust 6		1	calcium-dependent cell-cell adhesion via plasma membrane cell adhesion molecules
2_adjust 4 5_adjust 9_adjust		1	lipid metabolic process
2_adjust 5_adjust 6 9_adjust		1	positive regulation of bone resorption
2_adjust 5_adjust 7_adjust 9_adjust		1	response to hypoxia
2_adjust 5_adjust 8 9_adjust		6	removal of superoxide radicals
			cell redox homeostasis
			negative regulation of neuron death
			zymogen activation
			plasminogen activation
			proteolysis involved in cellular protein catabolic process
3_adjust 5_adjust 6 9_adjust		2	positive regulation of peptidyl-threonine phosphorylation
			osteoblast differentiation
3_adjust 5_adjust 8 9_adjust		2	carbon dioxide transport
			response to reactive oxygen species
5_adjust 6 8 9_adjust		1	positive regulation of CoA-transferase activity
1_adjust 2_adjust 3_adjust		3	transmembrane receptor protein serine/threonine kinase signaling pathway
			cellular response to growth factor stimulus
			negative regulation of neuron differentiation
1_adjust 2_adjust 5_adjust		2	oligosaccharide catabolic process
			positive regulation of peptidase activity
1_adjust 2_adjust 9_adjust		3	positive regulation of endothelial cell migration
			regulation of cell shape
			nucleus organization
1_adjust 3_adjust 9_adjust		1	negative regulation of interleukin-2 production
1_adjust 4 8		5	defense response to bacterium
			phagocytosis, engulfment
			positive regulation of B cell activation
			phagocytosis, recognition
			B cell receptor signaling pathway
1_adjust 5_adjust 9_adjust		8	response to zinc ion
			response to xenobiotic stimulus
			response to glucocorticoid
			nuclear envelope reassembly
			actin cytoskeleton reorganization
			negative regulation of peptidase activity
			substantia nigra development
			response to cadmium ion
1_adjust 8 9_adjust		2	positive regulation of NIK/NF-kappaB signaling
			cholesterol metabolic process
2_adjust 3_adjust 4		1	heterotypic cell-cell adhesion
2_adjust 3_adjust 5_adjust		6	immune system process
			skin development
			synaptic membrane adhesion
			regulation of smooth muscle cell migration
			morphogenesis of an epithelium
			cytoplasmic translation
2_adjust 3_adjust 6		4	Notch signaling pathway
			regulation of heart rate
			cerebral cortex development
			regulation of calcium-mediated signaling
2_adjust 3_adjust 7_adjust		1	positive regulation of gene expression
2_adjust 3_adjust 8		7	positive regulation of angiogenesis
			integrin-mediated signaling pathway
			central nervous system development
			peptidyl-tyrosine dephosphorylation
			interspecies interaction between organisms
			maintenance of permeability of blood-brain barrier
			positive regulation of protein kinase B signaling
2_adjust 3_adjust 9_adjust		5	wound healing, spreading of cells
			positive regulation of viral life cycle
			heparan sulfate proteoglycan catabolic process
			glial cell migration
			skeletal system development
2_adjust 5_adjust 6		1	response to nutrient levels
2_adjust 5_adjust 8		2	negative regulation of cell-substrate adhesion
			muscle cell cellular homeostasis
2_adjust 5_adjust 9_adjust		5	lysosome organization
			glutathione metabolic process
			cellular response to indole-3-methanol
			female pregnancy
			positive regulation of cell growth
2_adjust 6 9_adjust		1	positive regulation of smooth muscle cell migration
2_adjust 8 9_adjust		2	positive regulation of endocytosis
			positive regulation of superoxide anion generation
3_adjust 5_adjust 9_adjust		1	peptide catabolic process
4 5_adjust 9_adjust		3	glycoside catabolic process
			response to nutrient
			cell-cell junction assembly
5_adjust 6 9_adjust		4	response to heat
			regulation of ryanodine-sensitive calcium-release channel activity
			regulation of release of sequestered calcium ion into cytosol by sarcoplasmic reticulum
			regulation of cardiac muscle contraction by regulation of the release of sequestered calcium ion
5_adjust 7_adjust 9_adjust		2	oxaloacetate metabolic process
			liver development
5_adjust 8 9_adjust		12	protein processing
			binding of sperm to zona pellucida
			cellular iron ion homeostasis
			positive regulation of phagocytosis
			reverse cholesterol transport
			nitric oxide transport
			chaperone-mediated protein folding
			very-low-density lipoprotein particle remodeling
			proteasome-mediated ubiquitin-dependent protein catabolic process
			response to estrogen
			macromolecular complex assembly
			chaperone-mediated autophagy
1_adjust 2_adjust		3	endothelial cell migration
			negative regulation of T cell receptor signaling pathway
			response to wounding
1_adjust 5_adjust		1	negative regulation of proteolysis
1_adjust 6		2	maintenance of gastrointestinal epithelium
			retinoid metabolic process
1_adjust 8		3	negative regulation of protein metabolic process
			regulation of inflammatory response
			immunoglobulin production
1_adjust 9_adjust		25	viral budding via host ESCRT complex
			negative regulation of interferon-gamma production
			negative regulation of cell death
			viral release from host cell
			regulation of mitotic spindle assembly
			peptide metabolic process
			macroautophagy
			membrane fission
			viral budding from plasma membrane
			membrane budding
			negative regulation of platelet activation
			mitotic metaphase plate congression
			regulation of centrosome duplication
			late endosome to lysosome transport
			ESCRT III complex disassembly
			multivesicular body sorting pathway
			positive regulation of exosomal secretion
			autophagosome maturation
			multivesicular body-lysosome fusion
			positive regulation of viral release from host cell
			vesicle fusion with vacuole
			ubiquitin-dependent protein catabolic process via the multivesicular body sorting pathway
			multivesicular body assembly
			plasma membrane repair
			response to copper ion
2_adjust 3_adjust		32	sequestering of BMP in extracellular matrix
			chronic inflammatory response
			vascular smooth muscle cell development
			cytolysis
			animal organ morphogenesis
			cell recognition
			neuron projection regeneration
			leukocyte migration involved in inflammatory response
			positive regulation of protein binding
			positive regulation of osteoblast differentiation
			odontogenesis of dentin-containing tooth
			positive regulation of blood coagulation
			positive regulation of immune response
			elastic fiber assembly
			positive regulation of reactive oxygen species metabolic process
			locomotory behavior
			positive regulation of cell proliferation
			nervous system development
			positive regulation of integrin-mediated signaling pathway
			negative regulation of monocyte chemotaxis
			regulation of ventricular cardiac muscle cell action potential
			negative regulation of fibroblast growth factor receptor signaling pathway
			glycosaminoglycan metabolic process
			embryonic eye morphogenesis
			synapse maturation
			protein localization to cell junction
			positive regulation of apoptotic process
			negative regulation of BMP signaling pathway
			artery morphogenesis
			membrane protein ectodomain proteolysis
			cellular response to mechanical stimulus
			tissue development
2_adjust 5_adjust		2	intermediate filament cytoskeleton organization
			interaction with symbiont
2_adjust 6		5	protein localization to plasma membrane
			regulation of immune system process
			actin crosslink formation
			regulation of actin cytoskeleton organization
			blood vessel remodeling
2_adjust 7_adjust		2	protein kinase A signaling
			cell surface receptor signaling pathway
2_adjust 8		2	myoblast differentiation
			embryo implantation
2_adjust 9_adjust		7	synaptic vesicle endocytosis
			positive regulation of fibroblast proliferation
			positive regulation of actin filament polymerization
			cellular response to beta-amyloid
			cellular sodium ion homeostasis
			regulation of cytoskeleton organization
			negative regulation of blood coagulation
3_adjust 6		1	detection of calcium ion
3_adjust 8		2	extrinsic apoptotic signaling pathway
			adaptive immune response
3_adjust 9_adjust		1	G2/M transition of mitotic cell cycle
4 5_adjust		1	maintenance of location in cell
4 9_adjust		1	negative regulation of coagulation
5_adjust 7_adjust		2	kidney development
			cellular response to cAMP
5_adjust 8		22	positive regulation of protein localization to Cajal body
			negative regulation of smooth muscle cell proliferation
			leukocyte activation
			negative regulation of extrinsic apoptotic signaling pathway via death domain receptors
			sarcomere organization
			peripheral nervous system axon regeneration
			high-density lipoprotein particle clearance
			positive regulation of telomerase RNA localization to Cajal body
			positive regulation of establishment of protein localization to telomere
			positive regulation of protein secretion
			protein refolding
			blood coagulation, fibrin clot formation
			phospholipid efflux
			toxin transport
			lipoprotein metabolic process
			response to selenium ion
			positive regulation of exocytosis
			cholesterol efflux
			cellular response to heat
			mammary gland involution
			positive regulation of peptide hormone secretion
			opsonization
5_adjust 9_adjust		29	response to L-ascorbic acid
			peptidyl-tyrosine phosphorylation
			regulation of cardiac muscle cell action potential
			positive regulation of protein localization to early endosome
			autocrine signaling
			innate immune response in mucosa
			lysosomal protein catabolic process
			tricarboxylic acid cycle
			regulation of gene expression, epigenetic
			iron ion homeostasis
			cellular response to hormone stimulus
			tumor necrosis factor-mediated signaling pathway
			iron ion transport
			glucose metabolic process
			synaptic vesicle lumen acidification
			apical junction assembly
			regulation of gene silencing
			cellular response to interleukin-7
			membrane fusion
			response to methylmercury
			N-glycan processing
			cellular response to lipopolysaccharide
			protein import
			lung development
			angiotensin maturation
			positive regulation of receptor-mediated endocytosis
			lysosomal lumen acidification
			purine ribonucleoside salvage
			chromatin silencing
6 7_adjust		1	positive regulation of cytosolic calcium ion concentration
6 8		1	negative regulation of cell growth
6 9_adjust		8	positive regulation of interleukin-1 beta production
			cell proliferation
			positive regulation of extracellular exosome assembly
			positive regulation of insulin receptor signaling pathway
			positive regulation of protein autophosphorylation
			ephrin receptor signaling pathway
			regulation of protein binding
			one-carbon metabolic process
7_adjust 9_adjust		2	positive regulation of cysteine-type endopeptidase activity involved in apoptotic process
			bone morphogenesis
8 9_adjust		10	actin filament polymerization
			beta-amyloid clearance
			positive regulation of tau-protein kinase activity
			regulation of peptidyl-tyrosine phosphorylation
			low-density lipoprotein particle remodeling
			adult locomotory behavior
			osteoclast differentiation
			positive regulation of phosphorylation
			ATP metabolic process
			post-Golgi vesicle-mediated transport
1_adjust		21	negative regulation of long-term synaptic potentiation
			regulation of phospholipase A2 activity
			pyruvate metabolic process
			acute inflammatory response to antigenic stimulus
			antifungal humoral response
			negative regulation of immunological synapse formation
			positive regulation of neuron apoptotic process
			positive regulation of phosphatidylinositol 3-kinase signaling
			vacuolar transport
			thyroid hormone transport
			regulation of renal output by angiotensin
			hyaluronan catabolic process
			chondrocyte development
			vasodilation
			protein targeting to vacuole involved in ubiquitin-dependent protein catabolic process via the multivesicular body sorting pathway
			positive regulation of transforming growth factor beta receptor signaling pathway
			positive regulation of filopodium assembly
			response to lipid
			protein homooligomerization
			positive regulation of ruffle assembly
			nitric oxide mediated signal transduction
2_adjust		33	positive regulation of cellular extravasation
			positive regulation of apoptotic signaling pathway
			ciliary neurotrophic factor-mediated signaling pathway
			regulation of fibrinolysis
			synapse assembly
			regulation of microvillus length
			positive regulation of axon extension involved in axon guidance
			protein localization to bicellular tight junction
			regulation of epithelial cell proliferation
			extracellular matrix disassembly
			apoptotic process
			cell adhesion mediated by integrin
			regulation of cell migration
			collagen biosynthetic process
			response to amphetamine
			transforming growth factor beta receptor signaling pathway
			cytolysis by host of symbiont cells
			cell chemotaxis
			angiogenesis involved in wound healing
			negative regulation of axon extension
			lysosomal transport
			positive regulation of protein metabolic process
			regulation of cell differentiation
			regulation of the force of heart contraction
			commissural neuron axon guidance
			collagen catabolic process
			membrane protein intracellular domain proteolysis
			establishment of endothelial barrier
			calcium-mediated signaling using intracellular calcium source
			urokinase plasminogen activator signaling pathway
			leukocyte tethering or rolling
			neutrophil extravasation
			brain development
3_adjust		17	negative regulation of protein processing
			protein trimerization
			negative regulation of Wnt signaling pathway
			positive regulation of pathway-restricted SMAD protein phosphorylation
			positive regulation of epithelial cell proliferation
			regulation of actin filament polymerization
			positive regulation of astrocyte differentiation
			aorta morphogenesis
			negative regulation of oxidative stress-induced intrinsic apoptotic signaling pathway
			endothelial cell differentiation
			positive regulation of odontogenesis of dentin-containing tooth
			negative regulation of extrinsic apoptotic signaling pathway
			neutrophil aggregation
			cardiac muscle cell action potential involved in contraction
			T cell mediated immunity
			lymph circulation
			negative regulation of intrinsic apoptotic signaling pathway in response to DNA damage by p53 class mediator
4		6	purine nucleobase biosynthetic process
			regulation of chaperone-mediated autophagy
			chondroitin sulfate catabolic process
			negative regulation of cytokine production involved in inflammatory response
			fatty acid transport
			lactation
5_adjust		50	positive regulation of protein localization to plasma membrane
			protein folding in endoplasmic reticulum
			cell morphogenesis
			intermediate filament bundle assembly
			negative regulation of receptor-mediated endocytosis
			regulation of presynapse assembly
			actin filament network formation
			regulation of Rho protein signal transduction
			positive regulation of plasminogen activation
			cellular response to interleukin-4
			lipoprotein transport
			regulation of extracellular matrix disassembly
			translational elongation
			establishment of epithelial cell apical/basal polarity
			protein secretion
			fatty acid metabolic process
			antigen processing and presentation
			xenobiotic catabolic process
			organelle localization
			vitamin transport
			glycosphingolipid metabolic process
			positive regulation of apoptotic cell clearance
			heart contraction
			positive regulation of fibrinolysis
			regulation of synapse organization
			positive regulation of cytoplasmic translation
			cellular response to insulin stimulus
			aspartate metabolic process
			response to endoplasmic reticulum stress
			2-oxoglutarate metabolic process
			cellular response to thyroid hormone stimulus
			cellular response to redox state
			dephosphorylation
			protein maturation by protein folding
			positive regulation of intrinsic apoptotic signaling pathway
			response to dietary excess
			bradykinin catabolic process
			regulation of cell death
			regulation of insulin-like growth factor receptor signaling pathway
			response to amino acid
			protein targeting
			negative regulation of insulin secretion
			response to organic substance
			Rho protein signal transduction
			cellular protein modification process
			response to herbicide
			negative regulation of cell adhesion
			arginine catabolic process
			cellular response to iron ion
			glutathione derivative biosynthetic process
6		23	negative regulation of peptidyl-threonine phosphorylation
			carbohydrate mediated signaling
			negative regulation of complement activation, alternative pathway
			multicellular organism aging
			cellular amino acid metabolic process
			positive regulation of renal sodium excretion
			glomerular capillary formation
			response to mineralocorticoid
			activation of adenylate cyclase activity
			positive regulation of protein import into nucleus
			ATP export
			negative regulation of cysteine-type endopeptidase activity involved in apoptotic process
			response to corticosterone
			positive regulation of type B pancreatic cell proliferation
			plasma membrane organization
			regulation of cardiac muscle contraction
			positive regulation of blood pressure
			positive regulation of stress fiber assembly
			positive regulation of cell-matrix adhesion
			regulation of blood coagulation
			negative regulation of complement activation
			virion attachment to host cell
			response to lipid hydroperoxide
7_adjust		7	ventricular compact myocardium morphogenesis
			enzyme linked receptor protein signaling pathway
			negative regulation of osteoclast development
			regulation of immune response
			negative regulation of sodium ion transmembrane transporter activity
			malate metabolic process
			regulation of gastrulation
8		66	negative regulation of gene expression
			positive regulation of erythrocyte differentiation
			negative regulation of MAP kinase activity
			induction of bacterial agglutination
			supramolecular fiber organization
			positive regulation of telomere maintenance via telomerase
			placenta development
			very-low-density lipoprotein particle assembly
			positive regulation of peptidyl-serine phosphorylation
			regulation of protein ubiquitination
			negative regulation of protein kinase activity
			positive regulation of telomerase activity
			negative regulation of DNA damage response, signal transduction by p53 class mediator
			regulation of cholesterol transport
			glucocorticoid metabolic process
			negative regulation of translation
			protein dephosphorylation
			ectopic germ cell programmed cell death
			negative regulation of membrane tubulation
			positive regulation of cholesterol efflux
			high-density lipoprotein particle remodeling
			response to lead ion
			cholesterol homeostasis
			regulation of Cdc42 protein signal transduction
			regulation of intestinal cholesterol absorption
			detection of molecule of bacterial origin
			regulation of histone ubiquitination
			negative regulation of very-low-density lipoprotein particle remodeling
			positive regulation of interleukin-8 production
			triglyceride metabolic process
			axon extension
			mRNA catabolic process
			chaperone-mediated protein complex assembly
			regulation of axon extension
			pentose-phosphate shunt
			negative regulation of macrophage chemotaxis
			lipid transport
			negative regulation of cholesterol import
			fibroblast proliferation
			cellular response to unfolded protein
			blood circulation
			cellular response to steroid hormone stimulus
			peptidyl-serine dephosphorylation
			immune response
			negative regulation of lipid catabolic process
			methylglyoxal metabolic process
			positive regulation of cytokine production
			positive regulation of vascular endothelial growth factor production
			regulation of proteasomal protein catabolic process
			response to axon injury
			negative regulation of fatty acid biosynthetic process
			chaperone mediated protein folding requiring cofactor
			ubiquitin-dependent protein catabolic process
			response to unfolded protein
			triglyceride homeostasis
			chylomicron remnant clearance
			Factor XII activation
			lipoprotein biosynthetic process
			regulation of apoptotic process
			high-density lipoprotein particle assembly
			positive regulation of cholesterol esterification
			protein oxidation
			keratan sulfate catabolic process
			positive regulation of cell adhesion
			cellular response to oxidative stress
			scaRNA localization to Cajal body
9_adjust		70	luteinization
			positive regulation of JNK cascade
			regulation of systemic arterial blood pressure by renin-angiotensin
			regulation of cyclase activity
			ossification involved in bone maturation
			regulation of protein localization to membrane
			viral budding
			cellular response to chemokine
			negative regulation of protein dephosphorylation
			regulation of cytokine production
			positive regulation of neuron death
			protein targeting to lysosome involved in chaperone-mediated autophagy
			killing of cells of other organism
			positive regulation of respiratory burst
			response to angiotensin
			muscular septum morphogenesis
			receptor-mediated virion attachment to host cell
			liver regeneration
			regulation of signal transduction
			plasma membrane to endosome transport
			mannose metabolic process
			positive regulation of protein catabolic process
			metabolic process
			positive regulation of phospholipase activity
			transmembrane receptor protein tyrosine kinase signaling pathway
			glucuronate catabolic process to xylulose 5-phosphate
			response to steroid hormone
			autophagy
			microglial cell activation
			positive regulation of T cell migration
			positive regulation by host of viral genome replication
			neuron projection morphogenesis
			regulation of calcium ion transport
			response to interleukin-1
			non-canonical Wnt signaling pathway
			regulation of beta-amyloid clearance
			L-phenylalanine catabolic process
			late endosomal microautophagy
			cellular response to increased oxygen levels
			positive regulation of amyloid fibril formation
			response to pH
			bone development
			negative regulation of protein complex assembly
			positive regulation of pinocytosis
			methionine biosynthetic process
			negative regulation of dendritic cell apoptotic process
			positive regulation of cellular protein catabolic process
			peptidyl-cysteine S-nitrosylation
			late endosome to vacuole transport via multivesicular body sorting pathway
			cellular aldehyde metabolic process
			negative regulation of transforming growth factor beta receptor signaling pathway
			regulation of blood vessel diameter
			nucleobase-containing small molecule interconversion
			positive regulation of sodium ion transport
			carboxylic acid metabolic process
			fibroblast growth factor receptor signaling pathway
			postsynaptic actin cytoskeleton organization
			response to radiation
			nucleobase-containing compound metabolic process
			apoptotic cell clearance
			response to insulin
			ubiquitin-independent protein catabolic process via the multivesicular body sorting pathway
			protein catabolic process
			cellular response to oxygen-glucose deprivation
			ovulation cycle
			negative regulation of myeloid cell apoptotic process
			negative regulation of activated T cell proliferation
			Wnt signaling pathway, planar cell polarity pathway
			endosome transport via multivesicular body sorting pathway
			positive regulation of viral entry into host cell

## Sheet: B
Canonical Pathways by IPA distribute in patients (P <0.05)
Names	Percentage of patients with common pathways	total	elements
P-1 P-11 P-15 P-17 P-3 P-5 P-9	7/9	4	LXR/RXR Activation
			FXR/RXR Activation
			Acute Phase Response Signaling
			Superoxide Radicals Degradation
P-1 P-13 P-15 P-17 P-3 P-5 P-9		1	NRF2-mediated Oxidative Stress Response
P-1 P-11 P-17 P-3 P-5 P-9	6/9	3	Ferroptosis Signaling Pathway
			Aryl Hydrocarbon Receptor Signaling
			γ-glutamyl Cycle
P-1 P-15 P-17 P-3 P-5 P-9		4	Neuroprotective Role of THOP1 in Alzheimer's Disease
			p70S6K Signaling
			Coagulation System
			Iron homeostasis signaling pathway
P-1 P-11 P-13 P-17 P-3 P-5		1	D-glucuronate Degradation I
P-1 P-11 P-15 P-17 P-3 P-7		1	Role of JAK family kinases in IL-6-type Cytokine Signaling
P-1 P-11 P-17 P-5 P-7 P-9		1	RHOGDI Signaling
P-1 P-11 P-15 P-17 P-5 P-9		1	Clathrin-mediated Endocytosis Signaling
P-13 P-17 P-3 P-5 P-7 P-9		1	Synaptogenesis Signaling Pathway
P-13 P-15 P-17 P-3 P-5 P-9		3	Role of Tissue Factor in Cancer
			Glioma Invasiveness Signaling
			ERK5 Signaling
P-11 P-13 P-17 P-5 P-7 P-9		1	Gα12/13 Signaling
P-1 P-13 P-3 P-5 P-9	5/9	1	Glutathione-mediated Detoxification
P-1 P-15 P-3 P-5 P-9		1	Neutrophil Extracellular Trap Signaling Pathway
P-1 P-17 P-3 P-5 P-9		2	Axonal Guidance Signaling
			Fcγ Receptor-mediated Phagocytosis in Macrophages and Monocytes
P-1 P-11 P-17 P-5 P-9		2	Tryptophan Degradation X (Mammalian, via Tryptamine)
			Xenobiotic Metabolism AHR Signaling Pathway
P-1 P-15 P-17 P-5 P-9		7	Caveolar-mediated Endocytosis Signaling
			Huntington's Disease Signaling
			Protein Ubiquitination Pathway
			BAG2 Signaling Pathway
			Intrinsic Prothrombin Activation Pathway
			Extrinsic Prothrombin Activation Pathway
			FAT10 Signaling Pathway
P-17 P-3 P-5 P-7 P-9		1	Signaling by Rho Family GTPases
P-13 P-17 P-3 P-5 P-9		4	Aspartate Degradation II
			Leukocyte Extravasation Signaling
			Role Of Osteoclasts In Rheumatoid Arthritis Signaling Pathway
			Tumor Microenvironment Pathway
P-15 P-17 P-3 P-5 P-9		4	Apelin Adipocyte Signaling Pathway
			Ephrin B Signaling
			Virus Entry via Endocytic Pathways
			RHOA Signaling
P-15 P-17 P-5 P-7 P-9		1	Oncostatin M Signaling
P-11 P-15 P-17 P-5 P-9		1	Xenobiotic Metabolism CAR Signaling Pathway
P-13 P-15 P-17 P-5 P-9		9	MSP-RON Signaling In Cancer Cells Pathway
			PPARα/RXRα Activation
			GM-CSF Signaling
			Epithelial Adherens Junction Signaling
			Chemokine Signaling
			Role of Macrophages, Fibroblasts and Endothelial Cells in Rheumatoid Arthritis
			Actin Cytoskeleton Signaling
			IGF-1 Signaling
			Phagosome Formation
P-1 P-15 P-17 P-3		4	Complement System
			L-cysteine Degradation III
			Gluconeogenesis I
			Glycolysis I
P-1 P-15 P-5 P-9		3	FcγRIIB Signaling in B Lymphocytes
			PI3K Signaling in B Lymphocytes
			B Cell Receptor Signaling
P-1 P-11 P-13 P-7		1	Hepatic Fibrosis / Hepatic Stellate Cell Activation
P-1 P-15 P-17 P-7		1	Atherosclerosis Signaling
P-1 P-11 P-15 P-17		1	LPS/IL-1 Mediated Inhibition of RXR Function
P-15 P-3 P-5 P-9		1	Glutathione Redox Reactions I
P-17 P-3 P-5 P-9		8	Ephrin Receptor Signaling
			Remodeling of Epithelial Adherens Junctions
			Integrin Signaling
			IL-8 Signaling
			Phagosome Maturation
			Actin Nucleation by ARP-WASP Complex
			14-3-3-mediated Signaling
			Sertoli Cell-Sertoli Cell Junction Signaling
P-11 P-15 P-17 P-3		1	Formaldehyde Oxidation II (Glutathione-dependent)
P-17 P-5 P-7 P-9		1	Regulation of Actin-based Motility by Rho
P-13 P-17 P-5 P-9		6	Reelin Signaling in Neurons
			S100 Family Signaling Pathway
			STAT3 Pathway
			Thrombin Signaling
			ILK Signaling
			Wound Healing Signaling Pathway
P-15 P-17 P-5 P-9		23	IL-6 Signaling
			mTOR Signaling
			Telomerase Signaling
			MSP-RON Signaling In Macrophages Pathway
			HIF1α Signaling
			Prostate Cancer Signaling
			Xenobiotic Metabolism Signaling
			Inhibition of ARE-Mediated mRNA Degradation Pathway
			Agrin Interactions at Neuromuscular Junction
			VEGF Signaling
			ERK/MAPK Signaling
			Mitochondrial Dysfunction
			PI3K/AKT Signaling
			PPAR Signaling
			Chaperone Mediated Autophagy Signaling Pathway
			CDK5 Signaling
			MSP-RON Signaling Pathway
			Amyotrophic Lateral Sclerosis Signaling
			Regulation of Cellular Mechanics by Calpain Protease
			Germ Cell-Sertoli Cell Junction Signaling
			Pentose Phosphate Pathway
			Glucocorticoid Receptor Signaling
			Regulation of eIF4 and p70S6K Signaling
P-11 P-13 P-15 P-5		1	HIPPO signaling
P-1 P-3 P-5		2	Glutamate Degradation II
			Aspartate Biosynthesis
P-1 P-15 P-3		3	Thiosulfate Disproportionation III (Rhodanese)
			Pentose Phosphate Pathway (Oxidative Branch)
			Rapoport-Luebering Glycolytic Shunt
P-1 P-17 P-3		1	Sucrose Degradation V (Mammalian)
P-1 P-5 P-9		1	Antigen Presentation Pathway
P-1 P-17 P-5		1	Phenylalanine Degradation IV (Mammalian, via Side Chain)
P-1 P-15 P-7		1	Systemic Lupus Erythematosus In B Cell Signaling Pathway
P-1 P-11 P-17		3	Ethanol Degradation II
			Histamine Degradation
			Noradrenaline and Adrenaline Degradation
P-3 P-5 P-7		1	Chondroitin Sulfate Degradation (Metazoa)
P-3 P-5 P-9		2	Coronavirus Replication Pathway
			GP6 Signaling Pathway
P-17 P-3 P-5		1	Renin-Angiotensin Signaling
P-3 P-7 P-9		1	SPINK1 Pancreatic Cancer Pathway
P-11 P-17 P-3		1	Leukotriene Biosynthesis
P-13 P-17 P-3		1	Pulmonary Fibrosis Idiopathic Signaling Pathway
P-15 P-5 P-9		2	Hypoxia Signaling in the Cardiovascular System
			Immunogenic Cell Death Signaling Pathway
P-17 P-5 P-9		45	fMLP Signaling in Neutrophils
			Xenobiotic Metabolism General Signaling Pathway
			Glycogen Degradation III
			Cardiac Hypertrophy Signaling
			Neurotrophin/TRK Signaling
			GNRH Signaling
			Adrenomedullin signaling pathway
			CNTF Signaling
			BMP signaling pathway
			Myelination Signaling Pathway
			Estrogen-Dependent Breast Cancer Signaling
			Endometrial Cancer Signaling
			Ephrin A Signaling
			Acute Myeloid Leukemia Signaling
			PAK Signaling
			nNOS Signaling in Neurons
			Tight Junction Signaling
			CCR3 Signaling in Eosinophils
			PDGF Signaling
			S-methyl-5'-thioadenosine Degradation II
			Macropinocytosis Signaling
			IL-2 Signaling
			Role of JAK1 and JAK3 in γc Cytokine Signaling
			Synaptic Long Term Depression
			GDNF Family Ligand-Receptor Interactions
			Gap Junction Signaling
			Glioblastoma Multiforme Signaling
			IL-3 Signaling
			NGF Signaling
			Paxillin Signaling
			PEDF Signaling
			Thrombopoietin Signaling
			Renal Cell Carcinoma Signaling
			PTEN Signaling
			Angiopoietin Signaling
			ERBB4 Signaling
			EIF2 Signaling
			RAC Signaling
			Role of MAPK Signaling in Promoting the Pathogenesis of Influenza
			Cholecystokinin/Gastrin-mediated Signaling
			Apoptosis Signaling
			Oxytocin Signaling Pathway
			ERB2-ERBB3 Signaling
			Glycogen Degradation II
			Endothelin-1 Signaling
P-11 P-13 P-5		1	Tyrosine Biosynthesis IV
P-13 P-17 P-5		1	Breast Cancer Regulation by Stathmin1
P-15 P-17 P-5		4	LPS-stimulated MAPK Signaling
			Senescence Pathway
			Neuregulin Signaling
			Inosine-5'-phosphate Biosynthesis II
P-11 P-13 P-17		4	Folate Polyglutamylation
			Superpathway of Serine and Glycine Biosynthesis I
			Glycine Biosynthesis I
			Folate Transformations I
P-1 P-3		5	Phospholipases
			Thyroid Hormone Biosynthesis
			Retinol Biosynthesis
			Eicosanoid Signaling
			L-cysteine Degradation I
P-1 P-11		3	Serotonin and Melatonin Biosynthesis
			Catecholamine Biosynthesis
			Serotonin Receptor Signaling
P-1 P-15		11	Role of NFAT in Regulation of the Immune Response
			B Cell Development
			Altered T Cell and B Cell Signaling in Rheumatoid Arthritis
			Eumelanin Biosynthesis
			Communication between Innate and Adaptive Immune Cells
			NADH Repair
			Phospholipase C Signaling
			IL-15 Signaling
			Systemic Lupus Erythematosus Signaling
			Pyrimidine Deoxyribonucleotides De Novo Biosynthesis I
			Xanthine and Xanthosine Salvage
P-1 P-17		14	Fatty Acid α-oxidation
			Pyruvate Fermentation to Lactate
			L-carnitine Biosynthesis
			Ethanol Degradation IV
			Alanine Degradation III
			Tyrosine Degradation I
			Oxidative Ethanol Degradation III
			Putrescine Degradation III
			Purine Nucleotides Degradation II (Aerobic)
			Dopamine Degradation
			Choline Degradation I
			Glycerol-3-phosphate Shuttle
			Sirtuin Signaling Pathway
			Alanine Biosynthesis II
P-3 P-7		2	Dermatan Sulfate Degradation (Metazoa)
			Lactose Degradation III
P-13 P-3		1	Glutamate Removal from Folates
P-15 P-3		1	Maturity Onset Diabetes of Young (MODY) Signaling
P-17 P-3		7	Sphingosine-1-phosphate Signaling
			Melatonin Degradation III
			Ceramide Degradation
			Airway Pathology in Chronic Obstructive Pulmonary Disease
			Pulmonary Healing Signaling Pathway
			Sphingosine and Sphingosine-1-phosphate Metabolism
			CXCR4 Signaling
P-5 P-7		1	IL-15 Production
P-5 P-9		5	Unfolded protein response
			Fatty Acid Biosynthesis Initiation II
			Glutathione Redox Reactions II
			Role of IL-17A in Psoriasis
			Methylglyoxal Degradation III
P-13 P-5		3	Factors Promoting Cardiogenesis in Vertebrates
			Glutathione Biosynthesis
			Ascorbate Recycling (Cytosolic)
P-15 P-5		3	Diphthamide Biosynthesis
			Guanine and Guanosine Salvage I
			Cell Cycle: G2/M DNA Damage Checkpoint Regulation
P-17 P-5		22	Gαs Signaling
			Thyroid Cancer Signaling
			Multiple Sclerosis Signaling Pathway
			UVC-Induced MAPK Signaling
			Systemic Lupus Erythematosus In T Cell Signaling Pathway
			Apelin Muscle Signaling Pathway
			VEGF Family Ligand-Receptor Interactions
			Natural Killer Cell Signaling
			Role of MAPK Signaling in the Pathogenesis of Influenza
			Glioma Signaling
			Chronic Myeloid Leukemia Signaling
			Regulation Of The Epithelial Mesenchymal Transition By Growth Factors Pathway
			TCA Cycle II (Eukaryotic)
			JAK/STAT Signaling
			FLT3 Signaling in Hematopoietic Progenitor Cells
			Fc Epsilon RI Signaling
			IL-1 Signaling
			HMGB1 Signaling
			Necroptosis Signaling Pathway
			Amyloid Processing
			Melanoma Signaling
			Role of NANOG in Mammalian Embryonic Stem Cell Pluripotency
P-17 P-7		1	Agranulocyte Adhesion and Diapedesis
P-17 P-9		2	Glycogen Biosynthesis II (from UDP-D-Glucose)
			Antiproliferative Role of Somatostatin Receptor 2
P-11 P-13		3	Phenylalanine Degradation I (Aerobic)
			Glycine Betaine Degradation
			dTMP De Novo Biosynthesis
P-11 P-17		3	Urea Cycle
			Superpathway of Citrulline Metabolism
			Serotonin Degradation
P-13 P-17		4	ID1 Signaling Pathway
			Hepatic Fibrosis Signaling Pathway
			Ovarian Cancer Signaling
			G-Protein Coupled Receptor Signaling
P-15 P-17		8	MicroRNA Biogenesis Signaling Pathway
			Ceramide Signaling
			Glutaryl-CoA Degradation
			Production of Nitric Oxide and Reactive Oxygen Species in Macrophages
			Purine Nucleotides De Novo Biosynthesis II
			Pentose Phosphate Pathway (Non-oxidative Branch)
			Xenobiotic Metabolism PXR Signaling Pathway
			IL-12 Signaling and Production in Macrophages
P-1		12	Galactose Degradation I (Leloir Pathway)
			Adenosine Nucleotides Degradation II
			Pyrimidine Ribonucleotides Interconversion
			Superpathway of Methionine Degradation
			TR/RXR Activation
			IL-10 Signaling
			Creatine-phosphate Biosynthesis
			Tumoricidal Function of Hepatic Natural Killer Cells
			Asparagine Degradation I
			NAD Signaling Pathway
			Retinoate Biosynthesis I
			Pyrimidine Ribonucleotides De Novo Biosynthesis
P-3		6	PCP (Planar Cell Polarity) Pathway
			Anandamide Degradation
			Methionine Salvage II (Mammalian)
			Role Of Osteoblasts In Rheumatoid Arthritis Signaling Pathway
			Role Of Chondrocytes In Rheumatoid Arthritis Signaling Pathway
			Retinoate Biosynthesis II
P-5		7	CSDE1 Signaling Pathway
			Sperm Motility
			The Visual Cycle
			Hematopoiesis from Multipotent Stem Cells
			Palmitate Biosynthesis I (Animals)
			Endoplasmic Reticulum Stress Pathway
			Human Embryonic Stem Cell Pluripotency
P-7		1	Role of JAK2 in Hormone-like Cytokine Signaling
P-11		6	Dopamine Receptor Signaling
			Citrulline-Nitric Oxide Cycle
			Choline Biosynthesis III
			Histidine Degradation III
			Tetrahydrofolate Salvage from 5,10-methenyltetrahydrofolate
			Arginine Biosynthesis IV
P-13		13	Dilated Cardiomyopathy Signaling Pathway
			Docosahexaenoic Acid (DHA) Signaling
			Vitamin-C Transport
			FAT10 Cancer Signaling Pathway
			Thioredoxin Pathway
			Semaphorin Neuronal Repulsive Signaling Pathway
			WNT/β-catenin Signaling
			Myo-inositol Biosynthesis
			Th1 and Th2 Activation Pathway
			Protein Kinase A Signaling
			CREB Signaling in Neurons
			Arsenate Detoxification I (Glutaredoxin)
			Antioxidant Action of Vitamin C
P-15		13	Pathogen Induced Cytokine Storm Signaling Pathway
			Coenzyme A Biosynthesis
			Macrophage Alternative Activation Signaling Pathway
			eNOS Signaling
			Methylglyoxal Degradation I
			Primary Immunodeficiency Signaling
			Adenine and Adenosine Salvage I
			Heme Biosynthesis from Uroporphyrinogen-III I
			Arginine Degradation I (Arginase Pathway)
			Tryptophan Degradation III (Eukaryotic)
			iNOS Signaling
			Heme Degradation
			Mitotic Roles of Polo-Like Kinase
P-17		56	Molecular Mechanisms of Cancer
			UVA-Induced MAPK Signaling
			Role of NFAT in Cardiac Hypertrophy
			Melanocyte Development and Pigmentation Signaling
			Cancer Drug Resistance By Drug Efflux
			Mechanisms of Viral Exit from Host Cells
			Endocannabinoid Developing Neuron Pathway
			Cardiac Hypertrophy Signaling (Enhanced)
			Glucose and Glucose-1-phosphate Degradation
			Guanosine Nucleotides Degradation III
			Non-Small Cell Lung Cancer Signaling
			Synaptic Long Term Potentiation
			Granulocyte Adhesion and Diapedesis
			ERBB Signaling
			NAD Phosphorylation and Dephosphorylation
			Oxytocin In Brain Signaling Pathway
			UDP-D-xylose and UDP-D-glucuronate Biosynthesis
			Colanic Acid Building Blocks Biosynthesis
			Opioid Signaling Pathway
			Prolactin Signaling
			Bladder Cancer Signaling
			Endocannabinoid Neuronal Synapse Pathway
			GABA Receptor Signaling
			NF-κB Activation by Viruses
			HGF Signaling
			Inhibition of Matrix Metalloproteases
			IL-17 Signaling
			Endocannabinoid Cancer Inhibition Pathway
			Sorbitol Degradation I
			SPINK1 General Cancer Pathway
			TGF-β Signaling
			AMPK Signaling
			Gαi Signaling
			G Beta Gamma Signaling
			Gαq Signaling
			Colorectal Cancer Metastasis Signaling
			GDP-glucose Biosynthesis
			SAPK/JNK Signaling
			α-Adrenergic Signaling
			Erythropoietin Signaling Pathway
			Regulation of the Epithelial-Mesenchymal Transition Pathway
			Glutamine Biosynthesis I
			Osteoarthritis Pathway
			IL-13 Signaling Pathway
			Circadian Rhythm Signaling
			Relaxin Signaling
			Glutamate Receptor Signaling
			TEC Kinase Signaling
			Apelin Endothelial Signaling Pathway
			P2Y Purigenic Receptor Signaling Pathway
			Estrogen Receptor Signaling
			Insulin Receptor Signaling
			Mouse Embryonic Stem Cell Pluripotency
			FAK Signaling
			Androgen Signaling
			HER-2 Signaling in Breast Cancer
