# Supplementary material for: Urinary proteome comparison in modified electroconvulsive therapy in depression disorder：new approach in the therapeutic mechanism
Source: Research Square preprint supplement (doi:10.21203/rs.3.rs-6664029/v1), 2025-05-23
Supplement: Supplementary file 2 [file 5772a2cbdb723306525c0a47.xlsx]

## Sheet: P1
Biological process enriched by differential proteins by GO (p <0.05)
Term	RT	Genes	Count	%	P-Value	Benjamini
negative regulation of endopeptidase activity	RT		29	8	6.2e-21	1.4e-17
protein localization to CENP-A containing chromatin	RT		14	3.9	1.4e-19	1.6e-16
negative regulation of megakaryocyte differentiation	RT		14	3.9	1.2e-18	9.5e-16
DNA replication-independent nucleosome assembly	RT		14	3.9	1.5e-16	8.6e-14
telomere organization	RT		14	3.9	2.8e-16	1.3e-13
DNA replication-dependent nucleosome assembly	RT		14	3.9	4.6e-15	1.8e-12
DNA-templated transcription, initiation	RT		14	3.9	9.6e-14	3.2e-11
complement activation, classical pathway	RT		18	5	9.8e-11	2.8e-08
viral budding via host ESCRT complex	RT		8	2.2	8.1e-08	2.1e-05
cell adhesion	RT		31	8.6	1.1e-07	2.5e-05
phagocytosis, engulfment	RT		14	3.9	1.7e-07	3.5e-05
positive regulation of B cell activation	RT		13	3.6	2.3e-07	4.5e-05
phagocytosis, recognition	RT		13	3.6	2.6e-07	4.6e-05
nucleosome assembly	RT		15	4.1	7.8e-07	0.00013
multivesicular body assembly	RT		8	2.2	1.1e-06	0.00017
innate immune response	RT		30	8.3	2e-06	0.0003
B cell receptor signaling pathway	RT		13	3.6	5.5e-06	0.00076
acute-phase response	RT		8	2.2	9.4e-06	0.0012
peptide cross-linking	RT		7	1.9	1.4e-05	0.0016
regulation of blood pressure	RT		10	2.8	1.4e-05	0.0016
carbohydrate metabolic process	RT		14	3.9	1.6e-05	0.0017
ubiquitin-dependent protein catabolic process via the multivesicular body sorting pathway	RT		7	1.9	1.7e-05	0.0018
fibrinolysis	RT		6	1.7	1.8e-05	0.0018
platelet aggregation	RT		8	2.2	2e-05	0.002
positive regulation of nitric oxide biosynthetic process	RT		8	2.2	2.7e-05	0.0025
glycosaminoglycan catabolic process	RT		5	1.4	4.7e-05	0.0042
proteolysis	RT		21	5.8	8.2e-05	0.0071
membrane fission	RT		7	1.9	8.9e-05	0.0074
defense response to bacterium	RT		15	4.1	0.00011	0.0091
keratinocyte differentiation	RT		8	2.2	0.00013	0.0097
cell-matrix adhesion	RT		10	2.8	0.00014	0.011
positive regulation of viral release from host cell	RT		4	1.1	0.0002	0.014
cell-cell adhesion	RT		13	3.6	0.0002	0.014
substantia nigra development	RT		7	1.9	0.00022	0.015
macroautophagy	RT		8	2.2	0.00025	0.016
viral release from host cell	RT		5	1.4	0.00026	0.017
epithelial cell differentiation	RT		9	2.5	0.00031	0.019
antibacterial humoral response	RT		7	1.9	0.00068	0.041
multivesicular body sorting pathway	RT		5	1.4	0.00071	0.042
vasodilation	RT		6	1.7	0.00083	0.048
aging	RT		12	3.3	0.00088	0.05
blood coagulation	RT		8	2.2	0.0011	0.06
intermediate filament organization	RT		7	1.9	0.0012	0.066
adherens junction organization	RT		5	1.4	0.0013	0.07
positive regulation of protein tyrosine kinase activity	RT		6	1.7	0.0014	0.073
viral budding from plasma membrane	RT		4	1.1	0.0018	0.093
positive regulation of cell activation	RT		3	0.8	0.0019	0.095
regulation of cell shape	RT		10	2.8	0.002	0.097
positive regulation of exosomal secretion	RT		4	1.1	0.0023	0.11
heterophilic cell-cell adhesion via plasma membrane cell adhesion molecules	RT		6	1.7	0.0024	0.11
response to hydrogen peroxide	RT		6	1.7	0.0027	0.12
response to drug	RT		14	3.9	0.0028	0.12
hyaluronan catabolic process	RT		4	1.1	0.0028	0.12
response to copper ion	RT		4	1.1	0.0028	0.12
positive regulation of ERK1 and ERK2 cascade	RT		12	3.3	0.0032	0.13
nuclear envelope reassembly	RT		4	1.1	0.0039	0.16
substrate adhesion-dependent cell spreading	RT		6	1.7	0.0039	0.16
positive regulation of phosphatidylinositol 3-kinase signaling	RT		7	1.9	0.004	0.16
collagen fibril organization	RT		6	1.7	0.0046	0.18
glomerular filtration	RT		4	1.1	0.0046	0.18
actin cytoskeleton reorganization	RT		6	1.7	0.0049	0.19
nitric oxide mediated signal transduction	RT		4	1.1	0.0053	0.2
regulation of centrosome duplication	RT		4	1.1	0.0061	0.23
autophagosome maturation	RT		5	1.4	0.0069	0.25
immunoglobulin production	RT		7	1.9	0.0072	0.25
response to mechanical stimulus	RT		6	1.7	0.0073	0.25
response to glucocorticoid	RT		6	1.7	0.0073	0.25
positive regulation of peptidyl-tyrosine phosphorylation	RT		7	1.9	0.0076	0.26
proteasomal ubiquitin-independent protein catabolic process	RT		4	1.1	0.008	0.27
negative regulation of platelet activation	RT		3	0.8	0.0085	0.28
response to wounding	RT		6	1.7	0.0088	0.28
negative regulation of interferon-gamma production	RT		5	1.4	0.0088	0.28
negative regulation of proteolysis	RT		4	1.1	0.009	0.28
regulation of mitotic spindle assembly	RT		4	1.1	0.009	0.28
negative regulation of neuron projection development	RT		6	1.7	0.0098	0.3
positive regulation of cell death	RT		5	1.4	0.01	0.31
viral entry into host cell	RT		7	1.9	0.011	0.32
negative regulation of protein metabolic process	RT		3	0.8	0.011	0.32
acute inflammatory response to antigenic stimulus	RT		3	0.8	0.011	0.32
nucleus organization	RT		4	1.1	0.011	0.33
plasma membrane repair	RT		4	1.1	0.012	0.35
negative regulation of T cell receptor signaling pathway	RT		4	1.1	0.012	0.35
response to xenobiotic stimulus	RT		11	3	0.013	0.35
homophilic cell adhesion via plasma membrane adhesion molecules	RT		9	2.5	0.013	0.35
transmembrane receptor protein serine/threonine kinase signaling pathway	RT		3	0.8	0.013	0.35
ESCRT III complex disassembly	RT		3	0.8	0.013	0.35
negative regulation of cell death	RT		6	1.7	0.014	0.35
receptor-mediated endocytosis	RT		6	1.7	0.014	0.35
retinoid metabolic process	RT		4	1.1	0.014	0.35
response to cadmium ion	RT		4	1.1	0.014	0.35
negative regulation of interleukin-2 production	RT		4	1.1	0.014	0.35
antimicrobial humoral immune response mediated by antimicrobial peptide	RT		7	1.9	0.014	0.36
oligosaccharide catabolic process	RT		3	0.8	0.016	0.39
multivesicular body-lysosome fusion	RT		3	0.8	0.016	0.39
vesicle fusion with vacuole	RT		3	0.8	0.016	0.39
response to estradiol	RT		7	1.9	0.016	0.39
cholesterol metabolic process	RT		6	1.7	0.017	0.42
axon guidance	RT		9	2.5	0.019	0.44
ossification	RT		6	1.7	0.019	0.44
antifungal humoral response	RT		3	0.8	0.019	0.44
pyruvate metabolic process	RT		3	0.8	0.019	0.44
leukocyte cell-cell adhesion	RT		4	1.1	0.02	0.45
positive regulation of filopodium assembly	RT		4	1.1	0.02	0.45
cellular response to growth factor stimulus	RT		5	1.4	0.022	0.48
thyroid hormone transport	RT		3	0.8	0.022	0.48
negative regulation of fibrinolysis	RT		3	0.8	0.022	0.48
response to lipid	RT		3	0.8	0.022	0.48
negative regulation of long-term synaptic potentiation	RT		3	0.8	0.022	0.48
positive regulation of cell migration	RT		11	3	0.023	0.48
response to oxidative stress	RT		7	1.9	0.023	0.48
proteasomal protein catabolic process	RT		4	1.1	0.023	0.48
endothelial cell migration	RT		4	1.1	0.023	0.48
positive regulation of transforming growth factor beta receptor signaling pathway	RT		4	1.1	0.025	0.51
response to lipopolysaccharide	RT		8	2.2	0.025	0.51
negative regulation of peptidase activity	RT		3	0.8	0.026	0.51
peptide metabolic process	RT		3	0.8	0.026	0.51
vacuolar transport	RT		3	0.8	0.026	0.51
negative regulation of neuron differentiation	RT		5	1.4	0.026	0.51
response to zinc ion	RT		4	1.1	0.027	0.53
positive regulation of neuron apoptotic process	RT		5	1.4	0.027	0.53
defense response to Gram-negative bacterium	RT		6	1.7	0.028	0.54
protein homooligomerization	RT		7	1.9	0.028	0.54
platelet activation	RT		5	1.4	0.029	0.54
positive regulation of ruffle assembly	RT		3	0.8	0.029	0.54
protein targeting to vacuole involved in ubiquitin-dependent protein catabolic process via the multivesicular body sorting pathway	RT		3	0.8	0.029	0.54
positive regulation of peptidase activity	RT		3	0.8	0.029	0.54
maintenance of gastrointestinal epithelium	RT		3	0.8	0.029	0.54
defense response to Gram-positive bacterium	RT		7	1.9	0.03	0.55
protein polymerization	RT		3	0.8	0.033	0.59
membrane budding	RT		3	0.8	0.033	0.59
positive regulation of heterotypic cell-cell adhesion	RT		3	0.8	0.033	0.59
cell-cell adhesion via plasma-membrane adhesion molecules	RT		4	1.1	0.033	0.59
positive regulation of endothelial cell migration	RT		5	1.4	0.035	0.61
regulation of phospholipase A2 activity	RT		2	0.6	0.036	0.61
negative regulation of immunological synapse formation	RT		2	0.6	0.036	0.61
regulation of renal output by angiotensin	RT		2	0.6	0.036	0.61
complement activation, alternative pathway	RT		3	0.8	0.037	0.63
protein folding	RT		8	2.2	0.037	0.63
response to ethanol	RT		7	1.9	0.037	0.63
positive regulation of NIK/NF-kappaB signaling	RT		5	1.4	0.038	0.63
inflammatory response	RT		14	3.9	0.039	0.65
positive regulation of protein serine/threonine kinase activity	RT		5	1.4	0.04	0.65
mitotic metaphase plate congression	RT		4	1.1	0.04	0.65
chondrocyte development	RT		3	0.8	0.041	0.66
late endosome to lysosome transport	RT		3	0.8	0.041	0.66
basement membrane organization	RT		3	0.8	0.041	0.66
angiogenesis	RT		10	2.8	0.042	0.66
regulation of inflammatory response	RT		6	1.7	0.044	0.68
multicellular organism development	RT		9	2.5	0.044	0.69
positive regulation of substrate adhesion-dependent cell spreading	RT		4	1.1	0.045	0.69
glycolytic process	RT		4	1.1	0.045	0.69
axon regeneration	RT		3	0.8	0.046	0.7
positive regulation of tumor necrosis factor production	RT		6	1.7	0.047	0.71

## Sheet: P2
Biological process enriched by differential proteins by GO (p <0.05)
Term	RT	Genes	Count	%	P-Value	Benjamini
cell adhesion	RT		92	15.2	9.4e-41	2.9e-37
protein localization to CENP-A containing chromatin	RT		14	2.3	1.3e-16	2.1e-13
negative regulation of megakaryocyte differentiation	RT		14	2.3	1.1e-15	1.2e-12
negative regulation of endopeptidase activity	RT		29	4.8	6.1e-15	4.8e-12
homophilic cell adhesion via plasma membrane adhesion molecules	RT		31	5.1	9.5e-15	5.9e-12
DNA replication-independent nucleosome assembly	RT		14	2.3	1.3e-13	6.9e-11
telomere organization	RT		14	2.3	2.5e-13	1.1e-10
cell-cell adhesion	RT		30	4.9	1e-12	4.1e-10
DNA replication-dependent nucleosome assembly	RT		14	2.3	3.7e-12	1.3e-09
proteolysis	RT		43	7.1	1.5e-11	4.5e-09
DNA-templated transcription, initiation	RT		14	2.3	7.1e-11	2e-08
keratinocyte differentiation	RT		16	2.6	4e-10	1.1e-07
peptide cross-linking	RT		12	2	6.5e-10	1.5e-07
epidermis development	RT		18	3	6.7e-10	1.5e-07
cell-cell adhesion via plasma-membrane adhesion molecules	RT		13	2.1	1.1e-09	2.3e-07
viral entry into host cell	RT		19	3.1	1.8e-09	3.5e-07
heterophilic cell-cell adhesion via plasma membrane cell adhesion molecules	RT		14	2.3	3.9e-09	7.1e-07
cell migration	RT		30	4.9	5.3e-09	9.2e-07
keratinization	RT		16	2.6	1e-08	1.6e-06
cell-matrix adhesion	RT		17	2.8	1.6e-07	2.5e-05
aging	RT		22	3.6	6.2e-07	9e-05
receptor-mediated endocytosis	RT		14	2.3	6.5e-07	9e-05
intermediate filament organization	RT		13	2.1	6.6e-07	9e-05
negative regulation of fibrinolysis	RT		7	1.2	1.1e-06	0.00015
hydrogen peroxide catabolic process	RT		9	1.5	1.3e-06	0.00017
positive regulation of cell migration	RT		25	4.1	2.2e-06	0.00026
angiogenesis	RT		24	4	3.6e-06	0.00041
epithelial cell differentiation	RT		14	2.3	5.7e-06	0.00063
chronic inflammatory response	RT		6	1	1e-05	0.0011
axon guidance	RT		19	3.1	1.4e-05	0.0014
retina homeostasis	RT		9	1.5	2.9e-05	0.0029
maintenance of permeability of blood-brain barrier	RT		8	1.3	3.4e-05	0.0033
response to mechanical stimulus	RT		11	1.8	3.5e-05	0.0033
calcium-dependent cell-cell adhesion via plasma membrane cell adhesion molecules	RT		9	1.5	4.1e-05	0.0038
leukocyte cell-cell adhesion	RT		8	1.3	4.2e-05	0.0038
phagocytosis	RT		11	1.8	5.1e-05	0.0044
membrane protein ectodomain proteolysis	RT		7	1.2	5.2e-05	0.0044
positive regulation of peptidase activity	RT		6	1	6.2e-05	0.0051
nucleosome assembly	RT		16	2.6	7.4e-05	0.0058
endocytosis	RT		19	3.1	7.6e-05	0.0058
blood coagulation	RT		12	2	7.6e-05	0.0058
tissue development	RT		8	1.3	7.8e-05	0.0058
signal transduction	RT		64	10.5	0.0001	0.0072
positive regulation of cell proliferation	RT		35	5.8	0.0001	0.0072
regulation of cell adhesion	RT		10	1.6	0.00011	0.0072
response to lipopolysaccharide	RT		16	2.6	0.00011	0.0072
cellular oxidant detoxification	RT		11	1.8	0.00012	0.0078
regulation of blood pressure	RT		11	1.8	0.00016	0.01
synaptic membrane adhesion	RT		7	1.2	0.00017	0.011
extracellular matrix organization	RT		16	2.6	0.00017	0.011
response to hydrogen peroxide	RT		9	1.5	0.00019	0.012
central nervous system development	RT		15	2.5	0.00021	0.013
axon regeneration	RT		6	1	0.00022	0.013
positive regulation of cyclic-nucleotide phosphodiesterase activity	RT		4	0.7	0.00027	0.016
response to ethanol	RT		14	2.3	0.00028	0.016
wound healing	RT		12	2	0.00032	0.018
cellular response to mechanical stimulus	RT		11	1.8	0.00032	0.018
response to oxidative stress	RT		13	2.1	0.00034	0.018
glycosaminoglycan catabolic process	RT		5	0.8	0.00035	0.019
substrate adhesion-dependent cell spreading	RT		9	1.5	0.00037	0.019
animal organ regeneration	RT		8	1.3	0.0004	0.021
inflammatory response	RT		27	4.4	0.00045	0.023
collagen fibril organization	RT		9	1.5	0.00046	0.023
negative regulation of apoptotic process	RT		32	5.3	0.00048	0.023
antimicrobial humoral immune response mediated by antimicrobial peptide	RT		12	2	0.00051	0.025
positive regulation of inflammatory response	RT		12	2	0.0006	0.029
response to calcium ion	RT		9	1.5	0.00065	0.03
response to yeast	RT		5	0.8	0.00068	0.031
carbohydrate metabolic process	RT		15	2.5	0.00086	0.039
receptor internalization	RT		8	1.3	0.00099	0.044
skeletal system development	RT		13	2.1	0.001	0.046
multicellular organism development	RT		17	2.8	0.0011	0.048
synapse assembly	RT		9	1.5	0.0013	0.056
locomotory behavior	RT		10	1.6	0.0015	0.062
positive regulation of blood coagulation	RT		5	0.8	0.0015	0.062
complement activation, alternative pathway	RT		5	0.8	0.0015	0.062
response to nutrient levels	RT		8	1.3	0.0015	0.062
response to peptide hormone	RT		8	1.3	0.0015	0.062
acute-phase response	RT		7	1.2	0.0017	0.065
basement membrane organization	RT		5	0.8	0.0019	0.074
regulation of cell migration	RT		11	1.8	0.002	0.078
endodermal cell differentiation	RT		6	1	0.0023	0.089
positive regulation of peptidyl-tyrosine phosphorylation	RT		10	1.6	0.0025	0.095
extracellular matrix disassembly	RT		7	1.2	0.0027	0.099
urokinase plasminogen activator signaling pathway	RT		3	0.5	0.0028	0.1
establishment of protein localization to mitochondrial membrane	RT		3	0.5	0.0028	0.1
platelet aggregation	RT		7	1.2	0.003	0.11
positive regulation of DNA binding	RT		6	1	0.0031	0.11
positive regulation of apoptotic process	RT		21	3.5	0.0033	0.11
negative regulation of T cell proliferation	RT		7	1.2	0.0033	0.12
animal organ morphogenesis	RT		12	2	0.0035	0.12
positive regulation of reactive oxygen species metabolic process	RT		6	1	0.004	0.14
morphogenesis of an epithelium	RT		5	0.8	0.0041	0.14
zymogen activation	RT		5	0.8	0.0041	0.14
ossification	RT		9	1.5	0.0045	0.15
positive regulation of angiogenesis	RT		13	2.1	0.0047	0.15
cytolysis	RT		5	0.8	0.0048	0.16
elastic fiber assembly	RT		4	0.7	0.0051	0.16
membrane protein intracellular domain proteolysis	RT		4	0.7	0.0051	0.16
cytolysis by host of symbiont cells	RT		4	0.7	0.0051	0.16
regulation of fibrinolysis	RT		3	0.5	0.0054	0.16
positive regulation of cell activation	RT		3	0.5	0.0054	0.16
astrocyte activation involved in immune response	RT		3	0.5	0.0054	0.16
skin development	RT		6	1	0.0058	0.17
positive regulation of tumor necrosis factor production	RT		10	1.6	0.0059	0.18
cytoplasmic translation	RT		9	1.5	0.0063	0.19
negative regulation of neuron projection development	RT		8	1.3	0.0064	0.19
positive regulation of integrin-mediated signaling pathway	RT		4	0.7	0.0065	0.19
removal of superoxide radicals	RT		4	0.7	0.0065	0.19
complement activation	RT		5	0.8	0.0066	0.19
myoblast differentiation	RT		5	0.8	0.0066	0.19
integrin-mediated signaling pathway	RT		10	1.6	0.0067	0.19
innate immune response	RT		31	5.1	0.0068	0.19
positive regulation of kinase activity	RT		8	1.3	0.0069	0.19
positive regulation of cell growth	RT		9	1.5	0.0072	0.2
collagen catabolic process	RT		6	1	0.008	0.21
negative regulation of blood coagulation	RT		4	0.7	0.0081	0.21
actin crosslink formation	RT		4	0.7	0.0081	0.21
protein stabilization	RT		15	2.5	0.0081	0.21
defense response to Gram-negative bacterium	RT		9	1.5	0.0082	0.21
negative regulation of T cell receptor signaling pathway	RT		5	0.8	0.0087	0.21
positive regulation of wound healing	RT		5	0.8	0.0087	0.21
interaction with symbiont	RT		3	0.5	0.0088	0.21
neuron projection regeneration	RT		3	0.5	0.0088	0.21
sequestering of BMP in extracellular matrix	RT		3	0.5	0.0088	0.21
negative regulation of calcium ion export from cell	RT		3	0.5	0.0088	0.21
ciliary neurotrophic factor-mediated signaling pathway	RT		3	0.5	0.0088	0.21
cellular response to indole-3-methanol	RT		3	0.5	0.0088	0.21
protein localization to bicellular tight junction	RT		3	0.5	0.0088	0.21
regulation of heart rate by cardiac conduction	RT		6	1	0.0088	0.21
positive regulation of osteoblast differentiation	RT		8	1.3	0.0092	0.22
positive regulation of protein binding	RT		8	1.3	0.0099	0.23
wound healing, spreading of cells	RT		4	0.7	0.0099	0.23
regulation of synaptic vesicle endocytosis	RT		4	0.7	0.0099	0.23
leukocyte migration involved in inflammatory response	RT		4	0.7	0.0099	0.23
odontogenesis of dentin-containing tooth	RT		7	1.2	0.0099	0.23
positive regulation of MAPK cascade	RT		12	2	0.01	0.24
protein localization to plasma membrane	RT		12	2	0.011	0.24
positive regulation of NF-kappaB transcription factor activity	RT		12	2	0.011	0.24
heterotypic cell-cell adhesion	RT		5	0.8	0.011	0.25
positive regulation of heterotypic cell-cell adhesion	RT		4	0.7	0.012	0.25
synapse maturation	RT		4	0.7	0.012	0.25
positive regulation of phosphoprotein phosphatase activity	RT		4	0.7	0.012	0.25
oxygen transport	RT		4	0.7	0.012	0.25
regulation of calcium-mediated signaling	RT		4	0.7	0.012	0.25
interspecies interaction between organisms	RT		4	0.7	0.012	0.25
cerebral cortex development	RT		8	1.3	0.013	0.27
positive regulation of protein tyrosine kinase activity	RT		6	1	0.013	0.27
bundle of His cell-Purkinje myocyte adhesion involved in cell communication	RT		3	0.5	0.013	0.27
regulation of smooth muscle cell migration	RT		3	0.5	0.013	0.27
neutrophil extravasation	RT		3	0.5	0.013	0.27
positive regulation of protein phosphorylation	RT		14	2.3	0.014	0.28
cellular response to beta-amyloid	RT		6	1	0.014	0.28
glutathione metabolic process	RT		6	1	0.014	0.28
positive regulation of collagen biosynthetic process	RT		5	0.8	0.014	0.28
positive regulation of apoptotic signaling pathway	RT		5	0.8	0.014	0.28
antigen processing and presentation of exogenous peptide antigen via MHC class II	RT		5	0.8	0.014	0.28
regulation of epithelial cell proliferation	RT		4	0.7	0.017	0.33
regulation of the force of heart contraction	RT		4	0.7	0.017	0.33
proteolysis involved in cellular protein catabolic process	RT		6	1	0.017	0.33
positive regulation of endothelial cell migration	RT		7	1.2	0.018	0.33
negative regulation of monocyte chemotaxis	RT		3	0.5	0.018	0.33
positive regulation of viral life cycle	RT		3	0.5	0.018	0.33
positive regulation of axon extension involved in axon guidance	RT		3	0.5	0.018	0.33
negative regulation of calcium ion transmembrane transporter activity	RT		3	0.5	0.018	0.33
positive regulation of cellular extravasation	RT		3	0.5	0.018	0.33
heparan sulfate proteoglycan catabolic process	RT		3	0.5	0.018	0.33
regulation of microvillus length	RT		3	0.5	0.018	0.33
defense response to Gram-positive bacterium	RT		10	1.6	0.018	0.33
protein kinase A signaling	RT		4	0.7	0.019	0.35
fibrinolysis	RT		4	0.7	0.019	0.35
negative regulation of cell-substrate adhesion	RT		4	0.7	0.019	0.35
endothelial cell migration	RT		5	0.8	0.02	0.35
positive regulation of canonical Wnt signaling pathway	RT		9	1.5	0.02	0.36
positive regulation of gene expression	RT		26	4.3	0.02	0.36
response to wounding	RT		7	1.2	0.02	0.36
negative regulation of BMP signaling pathway	RT		7	1.2	0.02	0.36
lysosome organization	RT		6	1	0.021	0.37
cell chemotaxis	RT		7	1.2	0.021	0.37
defense response to fungus	RT		5	0.8	0.021	0.37
regulation of heart rate	RT		5	0.8	0.021	0.37
regulation of immune system process	RT		4	0.7	0.022	0.37
positive regulation of immune response	RT		4	0.7	0.022	0.37
lysosomal transport	RT		4	0.7	0.022	0.37
leukocyte tethering or rolling	RT		4	0.7	0.022	0.37
positive regulation of actin filament polymerization	RT		6	1	0.023	0.38
regulation of high voltage-gated calcium channel activity	RT		3	0.5	0.023	0.39
intermediate filament cytoskeleton organization	RT		4	0.7	0.025	0.42
establishment of endothelial barrier	RT		4	0.7	0.025	0.42
positive regulation of superoxide anion generation	RT		4	0.7	0.025	0.42
response to hypoxia	RT		12	2	0.026	0.42
lipid metabolic process	RT		13	2.1	0.026	0.42
cell surface receptor signaling pathway	RT		17	2.8	0.026	0.43
Notch signaling pathway	RT		9	1.5	0.027	0.44
female pregnancy	RT		8	1.3	0.028	0.44
immune system process	RT		6	1	0.028	0.44
blood vessel remodeling	RT		5	0.8	0.028	0.44
peptidyl-tyrosine dephosphorylation	RT		5	0.8	0.028	0.44
positive regulation of bone resorption	RT		4	0.7	0.029	0.44
negative regulation of fibroblast growth factor receptor signaling pathway	RT		4	0.7	0.029	0.44
negative regulation of axon extension	RT		4	0.7	0.029	0.44
protein localization to cell junction	RT		3	0.5	0.029	0.45
positive regulation of ryanodine-sensitive calcium-release channel activity	RT		3	0.5	0.029	0.45
regulation of cell communication by electrical coupling involved in cardiac conduction	RT		3	0.5	0.029	0.45
cell recognition	RT		3	0.5	0.029	0.45
nervous system development	RT		21	3.5	0.031	0.48
positive regulation of fibroblast proliferation	RT		6	1	0.032	0.48
positive regulation of endocytosis	RT		4	0.7	0.032	0.48
calcium-mediated signaling using intracellular calcium source	RT		4	0.7	0.032	0.48
cell adhesion mediated by integrin	RT		5	0.8	0.033	0.5
cellular response to growth factor stimulus	RT		6	1	0.034	0.5
antibacterial humoral response	RT		6	1	0.034	0.5
apoptotic process	RT		28	4.6	0.035	0.5
transforming growth factor beta receptor signaling pathway	RT		8	1.3	0.036	0.5
glial cell migration	RT		3	0.5	0.036	0.5
collagen biosynthetic process	RT		3	0.5	0.036	0.5
transmembrane receptor protein serine/threonine kinase signaling pathway	RT		3	0.5	0.036	0.5
vascular smooth muscle cell development	RT		3	0.5	0.036	0.5
glycosaminoglycan metabolic process	RT		3	0.5	0.036	0.5
embryonic eye morphogenesis	RT		3	0.5	0.036	0.5
positive regulation of smooth muscle cell migration	RT		4	0.7	0.036	0.5
artery morphogenesis	RT		4	0.7	0.036	0.5
positive regulation of protein metabolic process	RT		4	0.7	0.036	0.5
positive regulation of MAP kinase activity	RT		7	1.2	0.036	0.5
response to amphetamine	RT		5	0.8	0.036	0.5
regulation of cell differentiation	RT		5	0.8	0.036	0.5
complement activation, classical pathway	RT		9	1.5	0.037	0.51
embryo implantation	RT		5	0.8	0.039	0.53
regulation of actin cytoskeleton organization	RT		7	1.2	0.04	0.54
negative regulation of neuron differentiation	RT		6	1	0.041	0.56
negative regulation of ryanodine-sensitive calcium-release channel activity	RT		3	0.5	0.043	0.57
regulation of ventricular cardiac muscle cell action potential	RT		3	0.5	0.043	0.57
commissural neuron axon guidance	RT		3	0.5	0.043	0.57
plasminogen activation	RT		3	0.5	0.043	0.57
oligosaccharide catabolic process	RT		3	0.5	0.043	0.57
angiogenesis involved in wound healing	RT		3	0.5	0.043	0.57
brain development	RT		15	2.5	0.043	0.57
regulation of cytoskeleton organization	RT		4	0.7	0.044	0.57
nucleus organization	RT		4	0.7	0.044	0.57
cellular sodium ion homeostasis	RT		4	0.7	0.044	0.57
positive regulation of nitric-oxide synthase activity	RT		4	0.7	0.044	0.57
muscle cell cellular homeostasis	RT		4	0.7	0.044	0.57
positive regulation of protein kinase B signaling	RT		9	1.5	0.045	0.58
glycolytic process	RT		5	0.8	0.045	0.58
cell redox homeostasis	RT		5	0.8	0.045	0.58
negative regulation of neuron death	RT		6	1	0.046	0.59
regulation of cell shape	RT		10	1.6	0.048	0.6
synaptic vesicle endocytosis	RT		5	0.8	0.048	0.61
adherens junction organization	RT		4	0.7	0.048	0.61

## Sheet: P3
Biological process enriched by differential proteins by GO (p <0.05)
Term	RT	Genes	Count	%	P-Value	Benjamini
cell adhesion	RT		64	14.7	2.2e-27	5.5e-24
protein localization to CENP-A containing chromatin	RT		14	3.2	1.7e-18	2.2e-15
negative regulation of megakaryocyte differentiation	RT		14	3.2	1.5e-17	1.3e-14
DNA replication-independent nucleosome assembly	RT		14	3.2	1.8e-15	1.1e-12
telomere organization	RT		14	3.2	3.5e-15	1.8e-12
DNA replication-dependent nucleosome assembly	RT		14	3.2	5.4e-14	2.3e-11
DNA-templated transcription, initiation	RT		14	3.2	1.1e-12	4e-10
keratinocyte differentiation	RT		15	3.4	5.4e-11	1.7e-08
peptide cross-linking	RT		11	2.5	4.7e-10	1.3e-07
epidermis development	RT		15	3.4	4.4e-09	1.1e-06
cell migration	RT		25	5.7	7.7e-09	1.8e-06
cell-cell adhesion	RT		21	4.8	8.3e-09	1.8e-06
negative regulation of endopeptidase activity	RT		18	4.1	2.3e-08	4.5e-06
viral entry into host cell	RT		15	3.4	4.9e-08	9e-06
hydrogen peroxide catabolic process	RT		9	2.1	1.1e-07	1.8e-05
proteolysis	RT		29	6.7	1.9e-07	3e-05
keratinization	RT		12	2.8	9e-07	0.00014
homophilic cell adhesion via plasma membrane adhesion molecules	RT		17	3.9	1.3e-06	0.00018
heterophilic cell-cell adhesion via plasma membrane cell adhesion molecules	RT		10	2.3	1.7e-06	0.00023
cellular oxidant detoxification	RT		11	2.5	6.8e-06	0.00088
response to mechanical stimulus	RT		10	2.3	1.5e-05	0.0018
endocytosis	RT		17	3.9	1.5e-05	0.0018
cell-cell adhesion via plasma-membrane adhesion molecules	RT		8	1.8	1.9e-05	0.0022
phagocytosis	RT		10	2.3	2.1e-05	0.0023
positive regulation of cell migration	RT		19	4.4	2.3e-05	0.0023
cell-matrix adhesion	RT		12	2.8	2.3e-05	0.0023
central nervous system development	RT		14	3.2	2.7e-05	0.0025
retina homeostasis	RT		8	1.8	2.7e-05	0.0025
nucleosome assembly	RT		14	3.2	3.4e-05	0.003
substrate adhesion-dependent cell spreading	RT		9	2.1	3.7e-05	0.0031
response to oxidative stress	RT		12	2.8	7.3e-05	0.006
wound healing	RT		11	2.5	8.9e-05	0.0071
intermediate filament organization	RT		9	2.1	9.5e-05	0.0073
positive regulation of cyclic-nucleotide phosphodiesterase activity	RT		4	0.9	0.0001	0.0076
angiogenesis	RT		17	3.9	0.00016	0.011
signal transduction	RT		48	11	0.0003	0.021
synaptic membrane adhesion	RT		6	1.4	0.00032	0.022
collagen fibril organization	RT		8	1.8	0.00033	0.022
aging	RT		14	3.2	0.00039	0.025
complement activation, alternative pathway	RT		5	1.1	0.00043	0.027
positive regulation of blood coagulation	RT		5	1.1	0.00043	0.027
response to calcium ion	RT		8	1.8	0.00045	0.027
maintenance of permeability of blood-brain barrier	RT		6	1.4	0.00053	0.031
basement membrane organization	RT		5	1.1	0.00055	0.032
positive regulation of cell proliferation	RT		26	6	0.00056	0.032
axon regeneration	RT		5	1.1	0.00068	0.038
negative regulation of apoptotic process	RT		25	5.7	0.0007	0.038
response to lipopolysaccharide	RT		12	2.8	0.00075	0.04
skeletal system development	RT		11	2.5	0.00089	0.047
response to hydrogen peroxide	RT		7	1.6	0.001	0.053
epithelial cell differentiation	RT		9	2.1	0.0011	0.054
establishment of protein localization to mitochondrial membrane	RT		3	0.7	0.0014	0.07
chronic inflammatory response	RT		4	0.9	0.0015	0.073
elastic fiber assembly	RT		4	0.9	0.002	0.094
inflammatory response	RT		20	4.6	0.0021	0.096
regulation of heart rate by cardiac conduction	RT		6	1.4	0.0022	0.099
regulation of cell adhesion	RT		7	1.6	0.0023	0.11
negative regulation of fibrinolysis	RT		4	0.9	0.0025	0.11
astrocyte activation involved in immune response	RT		3	0.7	0.0028	0.12
positive regulation of inflammatory response	RT		9	2.1	0.0031	0.13
response to ethanol	RT		10	2.3	0.0031	0.13
blood coagulation	RT		8	1.8	0.0032	0.13
positive regulation of angiogenesis	RT		11	2.5	0.0034	0.14
extracellular matrix organization	RT		11	2.5	0.0036	0.14
platelet aggregation	RT		6	1.4	0.0036	0.14
cytoplasmic translation	RT		8	1.8	0.0036	0.14
negative regulation of T cell proliferation	RT		6	1.4	0.0039	0.15
regulation of synaptic vesicle endocytosis	RT		4	0.9	0.0039	0.15
leukocyte migration involved in inflammatory response	RT		4	0.9	0.0039	0.15
positive regulation of collagen biosynthetic process	RT		5	1.1	0.0045	0.16
sequestering of BMP in extracellular matrix	RT		3	0.7	0.0046	0.16
neuron projection regeneration	RT		3	0.7	0.0046	0.16
negative regulation of calcium ion export from cell	RT		3	0.7	0.0046	0.16
positive regulation of phosphoprotein phosphatase activity	RT		4	0.9	0.0047	0.16
oxygen transport	RT		4	0.9	0.0047	0.16
interspecies interaction between organisms	RT		4	0.9	0.0047	0.16
synapse maturation	RT		4	0.9	0.0047	0.16
leukocyte cell-cell adhesion	RT		5	1.1	0.005	0.17
receptor internalization	RT		6	1.4	0.0055	0.18
positive regulation of DNA binding	RT		5	1.1	0.0056	0.18
regulation of smooth muscle cell migration	RT		3	0.7	0.0068	0.21
bundle of His cell-Purkinje myocyte adhesion involved in cell communication	RT		3	0.7	0.0068	0.21
positive regulation of apoptotic process	RT		16	3.7	0.0068	0.21
tissue development	RT		5	1.1	0.007	0.21
positive regulation of protein phosphorylation	RT		12	2.8	0.0073	0.22
receptor-mediated endocytosis	RT		7	1.6	0.0073	0.22
regulation of blood pressure	RT		7	1.6	0.0082	0.24
multicellular organism development	RT		12	2.8	0.0086	0.25
positive regulation of immune response	RT		4	0.9	0.009	0.25
peptidyl-tyrosine dephosphorylation	RT		5	1.1	0.0093	0.25
skin development	RT		5	1.1	0.0093	0.25
heparan sulfate proteoglycan catabolic process	RT		3	0.7	0.0094	0.25
positive regulation of viral life cycle	RT		3	0.7	0.0094	0.25
negative regulation of calcium ion transmembrane transporter activity	RT		3	0.7	0.0094	0.25
negative regulation of monocyte chemotaxis	RT		3	0.7	0.0094	0.25
protein stabilization	RT		12	2.8	0.0095	0.25
odontogenesis of dentin-containing tooth	RT		6	1.4	0.01	0.27
integrin-mediated signaling pathway	RT		8	1.8	0.011	0.28
positive regulation of canonical Wnt signaling pathway	RT		8	1.8	0.011	0.28
ossification	RT		7	1.6	0.011	0.28
animal organ morphogenesis	RT		9	2.1	0.011	0.28
negative regulation of fibroblast growth factor receptor signaling pathway	RT		4	0.9	0.012	0.29
morphogenesis of an epithelium	RT		4	0.9	0.012	0.29
cellular response to mechanical stimulus	RT		7	1.6	0.012	0.3
regulation of high voltage-gated calcium channel activity	RT		3	0.7	0.012	0.3
locomotory behavior	RT		7	1.6	0.013	0.31
cytolysis	RT		4	0.9	0.013	0.32
membrane protein ectodomain proteolysis	RT		4	0.9	0.013	0.32
artery morphogenesis	RT		4	0.9	0.015	0.35
cell recognition	RT		3	0.7	0.016	0.35
positive regulation of ryanodine-sensitive calcium-release channel activity	RT		3	0.7	0.016	0.35
protein localization to cell junction	RT		3	0.7	0.016	0.35
regulation of cell communication by electrical coupling involved in cardiac conduction	RT		3	0.7	0.016	0.35
animal organ regeneration	RT		5	1.1	0.017	0.37
complement activation	RT		4	0.9	0.017	0.37
positive regulation of peptidyl-tyrosine phosphorylation	RT		7	1.6	0.018	0.4
negative regulation of BMP signaling pathway	RT		6	1.4	0.019	0.4
positive regulation of nitric-oxide synthase activity	RT		4	0.9	0.019	0.4
transmembrane receptor protein serine/threonine kinase signaling pathway	RT		3	0.7	0.019	0.4
vascular smooth muscle cell development	RT		3	0.7	0.019	0.4
embryonic eye morphogenesis	RT		3	0.7	0.019	0.4
glycosaminoglycan metabolic process	RT		3	0.7	0.019	0.4
glial cell migration	RT		3	0.7	0.019	0.4
positive regulation of cell death	RT		5	1.1	0.019	0.4
axon guidance	RT		10	2.3	0.02	0.41
osteoblast differentiation	RT		8	1.8	0.02	0.41
positive regulation of wound healing	RT		4	0.9	0.021	0.42
positive regulation of epithelial cell proliferation	RT		6	1.4	0.021	0.42
nervous system development	RT		17	3.9	0.022	0.43
positive regulation of kinase activity	RT		6	1.4	0.022	0.43
negative regulation of interleukin-2 production	RT		4	0.9	0.023	0.45
regulation of ventricular cardiac muscle cell action potential	RT		3	0.7	0.023	0.45
negative regulation of ryanodine-sensitive calcium-release channel activity	RT		3	0.7	0.023	0.45
positive regulation of protein kinase B signaling	RT		8	1.8	0.024	0.45
positive regulation of MAPK cascade	RT		9	2.1	0.025	0.47
heterotypic cell-cell adhesion	RT		4	0.9	0.025	0.47
positive regulation of pathway-restricted SMAD protein phosphorylation	RT		5	1.1	0.025	0.47
negative regulation of Wnt signaling pathway	RT		5	1.1	0.025	0.47
positive regulation of NF-kappaB transcription factor activity	RT		9	2.1	0.026	0.48
extrinsic apoptotic signaling pathway	RT		5	1.1	0.027	0.48
positive regulation of osteoblast differentiation	RT		6	1.4	0.027	0.48
T cell mediated immunity	RT		3	0.7	0.027	0.48
positive regulation of astrocyte differentiation	RT		3	0.7	0.027	0.48
glycosaminoglycan catabolic process	RT		3	0.7	0.027	0.48
positive regulation of peptidyl-threonine phosphorylation	RT		4	0.9	0.027	0.48
positive regulation of protein binding	RT		6	1.4	0.028	0.5
antigen processing and presentation of exogenous peptide antigen via MHC class II	RT		4	0.9	0.03	0.51
endodermal cell differentiation	RT		4	0.9	0.03	0.51
positive regulation of protein dephosphorylation	RT		4	0.9	0.03	0.51
positive regulation of MAP kinase activity	RT		6	1.4	0.031	0.53
positive regulation of integrin-mediated signaling pathway	RT		3	0.7	0.032	0.54
antimicrobial humoral immune response mediated by antimicrobial peptide	RT		7	1.6	0.033	0.56
cerebral cortex development	RT		6	1.4	0.034	0.57
response to peptide hormone	RT		5	1.1	0.034	0.57
immune system process	RT		5	1.1	0.034	0.57
carbohydrate metabolic process	RT		9	2.1	0.036	0.59
negative regulation of oxidative stress-induced intrinsic apoptotic signaling pathway	RT		3	0.7	0.037	0.59
detection of calcium ion	RT		3	0.7	0.037	0.59
response to yeast	RT		3	0.7	0.037	0.59
carbon dioxide transport	RT		3	0.7	0.037	0.59
cellular response to growth factor stimulus	RT		5	1.1	0.04	0.63
antibacterial humoral response	RT		5	1.1	0.04	0.63
adaptive immune response	RT		17	3.9	0.041	0.63
positive regulation of reactive oxygen species metabolic process	RT		4	0.9	0.041	0.63
defense response to fungus	RT		4	0.9	0.041	0.63
regulation of heart rate	RT		4	0.9	0.041	0.63
negative regulation of protein processing	RT		3	0.7	0.042	0.63
endothelial cell differentiation	RT		3	0.7	0.042	0.63
aorta morphogenesis	RT		3	0.7	0.042	0.63
wound healing, spreading of cells	RT		3	0.7	0.042	0.63
positive regulation of gene expression	RT		19	4.4	0.042	0.63
G2/M transition of mitotic cell cycle	RT		5	1.1	0.043	0.63
neutrophil aggregation	RT		2	0.5	0.043	0.63
protein trimerization	RT		2	0.5	0.043	0.63
lymph circulation	RT		2	0.5	0.043	0.63
positive regulation of odontogenesis of dentin-containing tooth	RT		2	0.5	0.043	0.63
Notch signaling pathway	RT		7	1.6	0.044	0.64
innate immune response	RT		21	4.8	0.046	0.64
negative regulation of extrinsic apoptotic signaling pathway	RT		4	0.9	0.047	0.64
regulation of actin filament polymerization	RT		4	0.9	0.047	0.64
regulation of calcium-mediated signaling	RT		3	0.7	0.047	0.64
peptide catabolic process	RT		3	0.7	0.047	0.64
response to reactive oxygen species	RT		3	0.7	0.047	0.64
positive regulation of heterotypic cell-cell adhesion	RT		3	0.7	0.047	0.64
cardiac muscle cell action potential involved in contraction	RT		3	0.7	0.047	0.64
negative regulation of intrinsic apoptotic signaling pathway in response to DNA damage by p53 class mediator	RT		3	0.7	0.047	0.64
negative regulation of neuron differentiation	RT		5	1.1	0.047	0.64

## Sheet: P4
Biological process enriched by differential proteins by GO (p <0.05)
Term	RT	Genes	Count	%	P-Value	Benjamini
homophilic cell adhesion via plasma membrane adhesion molecules	RT		10	6.7	5.4e-06	0.0056
phagocytosis, engulfment	RT		8	5.4	2.4e-05	0.012
complement activation, classical pathway	RT		8	5.4	3.8e-05	0.013
positive regulation of B cell activation	RT		7	4.7	9.4e-05	0.02
phagocytosis, recognition	RT		7	4.7	9.9e-05	0.02
carbohydrate metabolic process	RT		8	5.4	0.0003	0.051
B cell receptor signaling pathway	RT		7	4.7	0.00047	0.065
cell-cell adhesion	RT		8	5.4	0.00056	0.065
innate immune response	RT		14	9.4	0.00056	0.065
cell adhesion	RT		13	8.7	0.00087	0.09
cell-cell junction assembly	RT		4	2.7	0.003	0.26
cell-cell adhesion via plasma-membrane adhesion molecules	RT		4	2.7	0.003	0.26
aging	RT		7	4.7	0.0033	0.26
calcium-dependent cell-cell adhesion via plasma membrane cell adhesion molecules	RT		4	2.7	0.0039	0.28
blood coagulation	RT		5	3.4	0.0041	0.28
lipid metabolic process	RT		7	4.7	0.0044	0.29
multicellular organism development	RT		7	4.7	0.0056	0.34
defense response to bacterium	RT		7	4.7	0.0085	0.48
axon guidance	RT		6	4	0.012	0.63
proteolysis	RT		9	6	0.013	0.65
adherens junction organization	RT		3	2	0.017	0.83
response to ethanol	RT		5	3.4	0.018	0.84
heterotypic cell-cell adhesion	RT		3	2	0.019	0.84
response to nutrient	RT		4	2.7	0.019	0.84
fatty acid transport	RT		3	2	0.022	0.9
negative regulation of endopeptidase activity	RT		5	3.4	0.023	0.92
maintenance of location in cell	RT		2	1.3	0.029	1
epithelial cell differentiation	RT		4	2.7	0.033	1
negative regulation of cytokine production involved in inflammatory response	RT		3	2	0.035	1
chondroitin sulfate catabolic process	RT		2	1.3	0.036	1
regulation of chaperone-mediated autophagy	RT		2	1.3	0.036	1
negative regulation of coagulation	RT		2	1.3	0.044	1
purine nucleobase biosynthetic process	RT		2	1.3	0.044	1
glycoside catabolic process	RT		2	1.3	0.044	1
positive regulation of tumor necrosis factor production	RT		4	2.7	0.046	1
lactation	RT		3	2	0.047	1

## Sheet: P5
Biological process enriched by differential proteins by GO (p <0.05)
Term	RT	Genes	Count	%	P-Value	Benjamini
telomere organization	RT		26	3.2	5e-33	1.8e-29
nucleosome assembly	RT		50	6.1	1.5e-30	2.7e-27
DNA replication-dependent nucleosome assembly	RT		24	2.9	1.9e-25	2.3e-22
protein localization to CENP-A containing chromatin	RT		15	1.8	9.2e-17	8.3e-14
DNA replication-independent nucleosome assembly	RT		16	2	7.2e-15	5.2e-12
negative regulation of megakaryocyte differentiation	RT		14	1.7	5.2e-14	3.1e-11
keratinocyte differentiation	RT		20	2.4	3e-12	1.6e-09
cell adhesion	RT		61	7.4	7.8e-12	3.5e-09
proteolysis	RT		51	6.2	1.2e-11	4.9e-09
regulation of gene silencing	RT		10	1.2	1.6e-11	5.9e-09
hydrogen peroxide catabolic process	RT		14	1.7	1.8e-11	6e-09
negative regulation of endopeptidase activity	RT		28	3.4	4.6e-11	1.4e-08
peptide cross-linking	RT		14	1.7	5.5e-11	1.5e-08
antibacterial humoral response	RT		18	2.2	1.3e-10	3.3e-08
keratinization	RT		20	2.4	2e-10	4.6e-08
response to hydrogen peroxide	RT		17	2.1	2.1e-10	4.6e-08
antimicrobial humoral immune response mediated by antimicrobial peptide	RT		23	2.8	5e-10	1.1e-07
proteolysis involved in cellular protein catabolic process	RT		16	2	6.1e-10	1.2e-07
intermediate filament organization	RT		18	2.2	8.8e-10	1.7e-07
cellular oxidant detoxification	RT		19	2.3	1.6e-09	2.8e-07
aging	RT		30	3.7	1.9e-09	3.3e-07
DNA-templated transcription, initiation	RT		14	1.7	2.6e-09	4.3e-07
proteasomal protein catabolic process	RT		13	1.6	5.1e-09	7.9e-07
retina homeostasis	RT		14	1.7	5.3e-09	7.9e-07
innate immune response in mucosa	RT		12	1.5	6e-09	8.6e-07
proteasomal ubiquitin-independent protein catabolic process	RT		11	1.3	9.2e-09	1.2e-06
carbohydrate metabolic process	RT		27	3.3	9.3e-09	1.2e-06
chromatin silencing	RT		14	1.7	1.9e-08	2.4e-06
fibrinolysis	RT		10	1.2	2e-08	2.5e-06
regulation of gene expression, epigenetic	RT		11	1.3	3.8e-08	4.6e-06
homophilic cell adhesion via plasma membrane adhesion molecules	RT		26	3.2	4e-08	4.6e-06
epidermis development	RT		18	2.2	5.4e-08	6e-06
acute-phase response	RT		13	1.6	7.6e-08	8.3e-06
calcium-dependent cell-cell adhesion via plasma membrane cell adhesion molecules	RT		13	1.6	1e-07	1.1e-05
cell-cell adhesion	RT		26	3.2	3.2e-07	3.3e-05
response to calcium ion	RT		14	1.7	1.4e-06	0.00014
morphogenesis of an epithelium	RT		9	1.1	1.5e-06	0.00015
glutathione metabolic process	RT		12	1.5	2.4e-06	0.00023
cell-cell adhesion via plasma-membrane adhesion molecules	RT		11	1.3	2.8e-06	0.00026
defense response to Gram-positive bacterium	RT		19	2.3	5.6e-06	0.00051
removal of superoxide radicals	RT		7	0.9	6.4e-06	0.00055
epithelial cell differentiation	RT		16	2	6.4e-06	0.00055
positive regulation of protein secretion	RT		12	1.5	6.8e-06	0.00057
cell redox homeostasis	RT		11	1.3	9.1e-06	0.00074
oxaloacetate metabolic process	RT		6	0.7	1.3e-05	0.001
platelet aggregation	RT		11	1.3	1.7e-05	0.0013
angiogenesis	RT		27	3.3	1.7e-05	0.0013
cell migration	RT		28	3.4	2.1e-05	0.0016
cell-cell junction assembly	RT		10	1.2	2.2e-05	0.0016
protein folding	RT		21	2.6	2.8e-05	0.002
leukocyte cell-cell adhesion	RT		9	1.1	3.4e-05	0.0024
heterophilic cell-cell adhesion via plasma membrane cell adhesion molecules	RT		11	1.3	4.3e-05	0.0029
protein folding in endoplasmic reticulum	RT		6	0.7	4.4e-05	0.0029
plasminogen activation	RT		6	0.7	4.4e-05	0.0029
response to ethanol	RT		18	2.2	4.4e-05	0.0029
positive regulation of substrate adhesion-dependent cell spreading	RT		10	1.2	6.2e-05	0.004
adherens junction organization	RT		8	1	8.4e-05	0.0053
response to cadmium ion	RT		8	1	0.00011	0.0067
response to oxidative stress	RT		16	2	0.00013	0.0081
positive regulation of phagocytosis	RT		10	1.2	0.00018	0.011
proteasome-mediated ubiquitin-dependent protein catabolic process	RT		22	2.7	0.00018	0.011
zymogen activation	RT		7	0.9	0.0002	0.012
chaperone-mediated protein folding	RT		9	1.1	0.00023	0.013
blood coagulation	RT		13	1.6	0.00025	0.014
response to lipopolysaccharide	RT		18	2.2	0.00028	0.016
regulation of cell communication by electrical coupling involved in cardiac conduction	RT		5	0.6	0.0003	0.016
wound healing	RT		14	1.7	0.00031	0.016
protein stabilization	RT		22	2.7	0.00031	0.016
protein polymerization	RT		6	0.7	0.00035	0.018
innate immune response	RT		44	5.4	0.00036	0.018
response to glucocorticoid	RT		11	1.3	0.00039	0.02
response to estrogen	RT		11	1.3	0.00049	0.025
response to hypoxia	RT		19	2.3	0.00056	0.028
response to zinc ion	RT		8	1	0.00057	0.028
positive regulation of cell migration	RT		24	2.9	0.0006	0.029
positive regulation of cyclic-nucleotide phosphodiesterase activity	RT		4	0.5	0.00065	0.03
negative regulation of calcium ion export from cell	RT		4	0.5	0.00065	0.03
substantia nigra development	RT		9	1.1	0.00069	0.032
response to estradiol	RT		14	1.7	0.00069	0.032
negative regulation of ryanodine-sensitive calcium-release channel activity	RT		5	0.6	0.00074	0.033
oligosaccharide catabolic process	RT		5	0.6	0.00074	0.033
response to organic substance	RT		7	0.9	0.001	0.044
glycosaminoglycan catabolic process	RT		5	0.6	0.0011	0.047
receptor internalization	RT		9	1.1	0.0012	0.051
positive regulation of apoptotic cell clearance	RT		4	0.5	0.0013	0.053
regulation of release of sequestered calcium ion into cytosol by sarcoplasmic reticulum	RT		6	0.7	0.0014	0.056
intermediate filament cytoskeleton organization	RT		6	0.7	0.0014	0.056
positive regulation of cell growth	RT		12	1.5	0.0014	0.056
antigen processing and presentation of exogenous peptide antigen via MHC class II	RT		7	0.9	0.0014	0.058
cell-matrix adhesion	RT		13	1.6	0.0015	0.059
negative regulation of fibrinolysis	RT		5	0.6	0.0015	0.06
regulation of blood pressure	RT		11	1.3	0.0016	0.062
response to mechanical stimulus	RT		10	1.2	0.0016	0.063
osteoblast differentiation	RT		14	1.7	0.0019	0.073
iron ion homeostasis	RT		8	1	0.002	0.074
glycolytic process	RT		8	1	0.002	0.074
negative regulation of peptidase activity	RT		5	0.6	0.002	0.076
positive regulation of receptor-mediated endocytosis	RT		6	0.7	0.0021	0.076
response to L-ascorbic acid	RT		4	0.5	0.0021	0.076
blood coagulation, fibrin clot formation	RT		4	0.5	0.0021	0.076
negative regulation of calcium ion transmembrane transporter activity	RT		4	0.5	0.0021	0.076
protein secretion	RT		9	1.1	0.0022	0.077
positive regulation of NF-kappaB transcription factor activity	RT		16	2	0.0027	0.094
cell morphogenesis	RT		11	1.3	0.0027	0.095
complement activation	RT		6	0.7	0.0031	0.11
regulation of high voltage-gated calcium channel activity	RT		4	0.5	0.0033	0.11
positive regulation of CoA-transferase activity	RT		4	0.5	0.0033	0.11
autocrine signaling	RT		4	0.5	0.0033	0.11
peptide catabolic process	RT		5	0.6	0.0035	0.11
positive regulation of cytoplasmic translation	RT		5	0.6	0.0035	0.11
inflammatory response	RT		30	3.7	0.0037	0.12
axon guidance	RT		17	2.1	0.0037	0.12
regulation of cell adhesion	RT		9	1.1	0.0037	0.12
multicellular organism development	RT		19	2.3	0.0038	0.12
cytoplasmic translation	RT		11	1.3	0.0038	0.12
positive regulation of ryanodine-sensitive calcium-release channel activity	RT		4	0.5	0.0048	0.15
positive regulation of protein localization to early endosome	RT		4	0.5	0.0048	0.15
very-low-density lipoprotein particle remodeling	RT		4	0.5	0.0048	0.15
establishment of protein localization to mitochondrial membrane	RT		3	0.4	0.0049	0.15
response to drug	RT		23	2.8	0.005	0.15
complement activation, classical pathway	RT		13	1.6	0.0051	0.15
synaptic membrane adhesion	RT		6	0.7	0.0052	0.15
defense response to Gram-negative bacterium	RT		11	1.3	0.0052	0.15
basement membrane organization	RT		5	0.6	0.0055	0.16
reverse cholesterol transport	RT		5	0.6	0.0055	0.16
response to heat	RT		8	1	0.0064	0.18
positive regulation of peptide hormone secretion	RT		4	0.5	0.0067	0.19
angiotensin maturation	RT		4	0.5	0.0067	0.19
positive regulation of establishment of protein localization to telomere	RT		4	0.5	0.0067	0.19
regulation of heart rate by cardiac conduction	RT		7	0.9	0.007	0.19
cellular response to hormone stimulus	RT		6	0.7	0.007	0.19
response to nutrient levels	RT		8	1	0.0078	0.21
iron ion transport	RT		5	0.6	0.0081	0.22
ossification	RT		10	1.2	0.0081	0.22
positive regulation of protein serine/threonine kinase activity	RT		9	1.1	0.0085	0.23
protein targeting	RT		7	0.9	0.0088	0.23
positive regulation of protein localization to Cajal body	RT		4	0.5	0.0089	0.23
response to amino acid	RT		6	0.7	0.0093	0.24
cellular iron ion homeostasis	RT		8	1	0.0094	0.24
glutathione derivative biosynthetic process	RT		3	0.4	0.0096	0.24
organelle localization	RT		3	0.4	0.0096	0.24
cellular response to redox state	RT		3	0.4	0.0096	0.24
maintenance of location in cell	RT		3	0.4	0.0096	0.24
positive regulation of fibrinolysis	RT		3	0.4	0.0096	0.24
lysosomal lumen acidification	RT		5	0.6	0.0097	0.24
translational elongation	RT		5	0.6	0.0097	0.24
positive regulation of kinase activity	RT		9	1.1	0.01	0.24
macromolecular complex assembly	RT		14	1.7	0.01	0.24
tricarboxylic acid cycle	RT		6	0.7	0.011	0.26
Rho protein signal transduction	RT		8	1	0.011	0.27
response to xenobiotic stimulus	RT		19	2.3	0.011	0.27
lipoprotein metabolic process	RT		5	0.6	0.011	0.27
positive regulation of bone resorption	RT		5	0.6	0.011	0.27
phospholipid efflux	RT		4	0.5	0.012	0.27
response to selenium ion	RT		4	0.5	0.012	0.27
actin filament network formation	RT		4	0.5	0.012	0.27
lipid metabolic process	RT		17	2.1	0.012	0.27
actin cytoskeleton reorganization	RT		8	1	0.012	0.28
lung development	RT		10	1.2	0.012	0.28
liver development	RT		10	1.2	0.013	0.3
xenobiotic catabolic process	RT		5	0.6	0.013	0.3
regulation of cardiac muscle contraction by regulation of the release of sequestered calcium ion	RT		5	0.6	0.013	0.3
glycosphingolipid metabolic process	RT		5	0.6	0.013	0.3
positive regulation of tumor necrosis factor production	RT		11	1.3	0.013	0.3
defense response to fungus	RT		6	0.7	0.014	0.3
positive regulation of nitric oxide biosynthetic process	RT		7	0.9	0.015	0.31
peptidyl-tyrosine phosphorylation	RT		13	1.6	0.015	0.31
regulation of presynapse assembly	RT		6	0.7	0.015	0.31
negative regulation of smooth muscle cell proliferation	RT		6	0.7	0.015	0.31
cellular response to indole-3-methanol	RT		3	0.4	0.016	0.31
nitric oxide transport	RT		3	0.4	0.016	0.31
intermediate filament bundle assembly	RT		3	0.4	0.016	0.31
regulation of extracellular matrix disassembly	RT		3	0.4	0.016	0.31
regulation of cardiac muscle cell action potential	RT		3	0.4	0.016	0.31
leukocyte activation	RT		3	0.4	0.016	0.31
interaction with symbiont	RT		3	0.4	0.016	0.31
protein import	RT		3	0.4	0.016	0.31
vitamin transport	RT		3	0.4	0.016	0.31
negative regulation of proteolysis	RT		5	0.6	0.016	0.31
negative regulation of neuron death	RT		8	1	0.016	0.31
platelet activation	RT		8	1	0.016	0.31
positive regulation of intrinsic apoptotic signaling pathway	RT		6	0.7	0.017	0.34
female pregnancy	RT		10	1.2	0.017	0.34
cellular response to interleukin-7	RT		4	0.5	0.018	0.34
carbon dioxide transport	RT		4	0.5	0.018	0.34
positive regulation of exocytosis	RT		5	0.6	0.018	0.34
protein refolding	RT		5	0.6	0.018	0.34
regulation of synapse organization	RT		5	0.6	0.018	0.34
skin development	RT		6	0.7	0.019	0.36
negative regulation of cell adhesion	RT		7	0.9	0.019	0.36
lysosome organization	RT		7	0.9	0.019	0.36
protein processing	RT		9	1.1	0.019	0.36
glucose metabolic process	RT		8	1	0.02	0.37
positive regulation of nitric-oxide synthase activity	RT		5	0.6	0.021	0.38
cellular response to interleukin-4	RT		5	0.6	0.021	0.38
muscle cell cellular homeostasis	RT		5	0.6	0.021	0.38
sarcomere organization	RT		6	0.7	0.021	0.38
positive regulation of peptidase activity	RT		4	0.5	0.022	0.39
response to dietary excess	RT		4	0.5	0.022	0.39
positive regulation of telomerase RNA localization to Cajal body	RT		4	0.5	0.022	0.39
regulation of smooth muscle cell migration	RT		3	0.4	0.023	0.4
bundle of His cell-Purkinje myocyte adhesion involved in cell communication	RT		3	0.4	0.023	0.4
aspartate metabolic process	RT		3	0.4	0.023	0.4
glycoside catabolic process	RT		3	0.4	0.023	0.4
cellular response to heat	RT		7	0.9	0.023	0.4
binding of sperm to zona pellucida	RT		6	0.7	0.023	0.41
cholesterol efflux	RT		5	0.6	0.023	0.41
response to endoplasmic reticulum stress	RT		9	1.1	0.024	0.41
viral entry into host cell	RT		10	1.2	0.025	0.42
tumor necrosis factor-mediated signaling pathway	RT		7	0.9	0.025	0.42
dephosphorylation	RT		7	0.9	0.025	0.42
synaptic vesicle lumen acidification	RT		4	0.5	0.026	0.43
establishment of epithelial cell apical/basal polarity	RT		4	0.5	0.026	0.43
positive regulation of heterotypic cell-cell adhesion	RT		4	0.5	0.026	0.43
positive regulation of phosphoprotein phosphatase activity	RT		4	0.5	0.026	0.43
response to reactive oxygen species	RT		4	0.5	0.026	0.43
regulation of Rho protein signal transduction	RT		5	0.6	0.027	0.44
negative regulation of extrinsic apoptotic signaling pathway via death domain receptors	RT		5	0.6	0.027	0.44
immune system process	RT		7	0.9	0.027	0.44
kidney development	RT		11	1.3	0.028	0.45
membrane fusion	RT		6	0.7	0.028	0.46
negative regulation of neuron projection development	RT		8	1	0.028	0.46
cellular response to lipopolysaccharide	RT		15	1.8	0.029	0.46
positive regulation of protein localization to plasma membrane	RT		7	0.9	0.029	0.47
cellular response to thyroid hormone stimulus	RT		4	0.5	0.031	0.48
apical junction assembly	RT		3	0.4	0.031	0.48
cellular response to iron ion	RT		3	0.4	0.031	0.48
high-density lipoprotein particle clearance	RT		3	0.4	0.031	0.48
bradykinin catabolic process	RT		3	0.4	0.031	0.48
arginine catabolic process	RT		3	0.4	0.031	0.48
regulation of cell death	RT		3	0.4	0.031	0.48
mammary gland involution	RT		3	0.4	0.031	0.48
response to herbicide	RT		3	0.4	0.031	0.48
negative regulation of apoptotic process	RT		32	3.9	0.031	0.48
substrate adhesion-dependent cell spreading	RT		7	0.9	0.031	0.48
positive regulation of peptidyl-threonine phosphorylation	RT		5	0.6	0.033	0.51
toxin transport	RT		6	0.7	0.034	0.51
2-oxoglutarate metabolic process	RT		4	0.5	0.036	0.53
nuclear envelope reassembly	RT		4	0.5	0.036	0.53
cellular response to insulin stimulus	RT		10	1.2	0.036	0.53
collagen fibril organization	RT		7	0.9	0.036	0.54
cellular response to cAMP	RT		7	0.9	0.036	0.54
animal organ regeneration	RT		6	0.7	0.037	0.54
positive regulation of collagen biosynthetic process	RT		5	0.6	0.037	0.54
positive regulation of protein dephosphorylation	RT		5	0.6	0.037	0.54
positive regulation of canonical Wnt signaling pathway	RT		10	1.2	0.037	0.55
signal transduction	RT		66	8	0.038	0.55
response to nutrient	RT		8	1	0.039	0.56
extracellular matrix organization	RT		13	1.6	0.04	0.56
chaperone-mediated autophagy	RT		3	0.4	0.04	0.56
regulation of insulin-like growth factor receptor signaling pathway	RT		3	0.4	0.04	0.56
purine ribonucleoside salvage	RT		3	0.4	0.04	0.56
positive regulation of plasminogen activation	RT		3	0.4	0.04	0.56
protein maturation by protein folding	RT		3	0.4	0.04	0.56
negative regulation of receptor-mediated endocytosis	RT		3	0.4	0.04	0.56
lysosomal protein catabolic process	RT		3	0.4	0.04	0.56
peripheral nervous system axon regeneration	RT		3	0.4	0.04	0.56
opsonization	RT		3	0.4	0.04	0.56
response to methylmercury	RT		3	0.4	0.04	0.56
negative regulation of insulin secretion	RT		5	0.6	0.041	0.56
negative regulation of cell-substrate adhesion	RT		4	0.5	0.041	0.56
N-glycan processing	RT		4	0.5	0.041	0.56
lipoprotein transport	RT		4	0.5	0.041	0.56
regulation of ryanodine-sensitive calcium-release channel activity	RT		4	0.5	0.041	0.56
glomerular filtration	RT		4	0.5	0.041	0.56
receptor-mediated endocytosis	RT		8	1	0.041	0.56
fatty acid metabolic process	RT		9	1.1	0.042	0.56
antigen processing and presentation	RT		6	0.7	0.043	0.57
positive regulation of cell death	RT		6	0.7	0.043	0.57
positive regulation of DNA binding	RT		5	0.6	0.045	0.6
cellular protein modification process	RT		9	1.1	0.046	0.61
heart contraction	RT		4	0.5	0.047	0.62
endocytosis	RT		15	1.8	0.049	0.63

## Sheet: P6
Biological process enriched by differential proteins by GO (p <0.05)
Term	RT	Genes	Count	%	P-Value	Benjamini
cell adhesion	RT		34	15.7	9.8e-16	1.6e-12
cell-cell adhesion	RT		15	6.9	1.9e-08	1.6e-05
negative regulation of endopeptidase activity	RT		12	5.6	5e-07	0.00028
homophilic cell adhesion via plasma membrane adhesion molecules	RT		11	5.1	1.7e-05	0.0066
cell-matrix adhesion	RT		9	4.2	2e-05	0.0066
axon guidance	RT		11	5.1	2.9e-05	0.008
positive regulation of protein serine/threonine kinase activity	RT		7	3.2	0.00011	0.024
viral entry into host cell	RT		8	3.7	0.00011	0.024
inflammatory response	RT		15	6.9	0.00015	0.028
glycosaminoglycan catabolic process	RT		4	1.9	0.00025	0.041
establishment of protein localization to mitochondrial membrane	RT		3	1.4	0.00034	0.051
signal transduction	RT		28	13	0.00049	0.066
regulation of heart rate	RT		5	2.3	0.00052	0.066
positive regulation of peptidyl-tyrosine phosphorylation	RT		7	3.2	0.00055	0.066
positive regulation of phosphoprotein phosphatase activity	RT		4	1.9	0.00061	0.068
negative regulation of complement activation	RT		3	1.4	0.00067	0.07
retina homeostasis	RT		5	2.3	0.00095	0.09
acute-phase response	RT		5	2.3	0.001	0.09
positive regulation of cyclic-nucleotide phosphodiesterase activity	RT		3	1.4	0.0011	0.09
negative regulation of calcium ion export from cell	RT		3	1.4	0.0011	0.09
calcium-dependent cell-cell adhesion via plasma membrane cell adhesion molecules	RT		5	2.3	0.0011	0.09
regulation of blood pressure	RT		6	2.8	0.0017	0.13
endocytosis	RT		9	4.2	0.0018	0.13
regulation of actin cytoskeleton organization	RT		6	2.8	0.0019	0.13
positive regulation of smooth muscle cell migration	RT		4	1.9	0.0021	0.13
positive regulation of insulin receptor signaling pathway	RT		4	1.9	0.0021	0.13
ephrin receptor signaling pathway	RT		5	2.3	0.0022	0.13
negative regulation of calcium ion transmembrane transporter activity	RT		3	1.4	0.0023	0.13
heterophilic cell-cell adhesion via plasma membrane cell adhesion molecules	RT		5	2.3	0.0023	0.13
positive regulation of protein autophosphorylation	RT		4	1.9	0.0023	0.13
cell migration	RT		10	4.6	0.0027	0.14
positive regulation of CoA-transferase activity	RT		3	1.4	0.0031	0.15
regulation of high voltage-gated calcium channel activity	RT		3	1.4	0.0031	0.15
multicellular organism aging	RT		4	1.9	0.0033	0.16
regulation of cell communication by electrical coupling involved in cardiac conduction	RT		3	1.4	0.0039	0.18
positive regulation of ryanodine-sensitive calcium-release channel activity	RT		3	1.4	0.0039	0.18
leukocyte cell-cell adhesion	RT		4	1.9	0.0048	0.21
aging	RT		8	3.7	0.0051	0.22
activation of adenylate cyclase activity	RT		4	1.9	0.0052	0.22
negative regulation of ryanodine-sensitive calcium-release channel activity	RT		3	1.4	0.0059	0.24
regulation of blood coagulation	RT		3	1.4	0.0059	0.24
angiogenesis	RT		9	4.2	0.006	0.24
one-carbon metabolic process	RT		4	1.9	0.0067	0.26
response to estradiol	RT		6	2.8	0.0071	0.27
positive regulation of cell migration	RT		9	4.2	0.0077	0.28
blood vessel remodeling	RT		4	1.9	0.0077	0.28
cell-cell adhesion via plasma-membrane adhesion molecules	RT		4	1.9	0.0083	0.29
Notch signaling pathway	RT		6	2.8	0.0085	0.3
extracellular matrix organization	RT		7	3.2	0.0088	0.3
actin crosslink formation	RT		3	1.4	0.0095	0.31
detection of calcium ion	RT		3	1.4	0.0095	0.31
response to yeast	RT		3	1.4	0.0095	0.31
positive regulation of protein import into nucleus	RT		4	1.9	0.011	0.32
positive regulation of renal sodium excretion	RT		3	1.4	0.011	0.32
maintenance of gastrointestinal epithelium	RT		3	1.4	0.011	0.32
regulation of synaptic vesicle endocytosis	RT		3	1.4	0.011	0.32
osteoblast differentiation	RT		6	2.8	0.011	0.33
cerebral cortex development	RT		5	2.3	0.012	0.33
negative regulation of cell growth	RT		6	2.8	0.012	0.34
regulation of calcium-mediated signaling	RT		3	1.4	0.012	0.34
epidermis development	RT		5	2.3	0.013	0.36
negative regulation of T cell proliferation	RT		4	1.9	0.015	0.39
positive regulation of nitric oxide biosynthetic process	RT		4	1.9	0.016	0.41
regulation of ryanodine-sensitive calcium-release channel activity	RT		3	1.4	0.017	0.45
positive regulation of blood pressure	RT		3	1.4	0.019	0.48
regulation of immune system process	RT		3	1.4	0.019	0.48
response to heat	RT		4	1.9	0.02	0.49
regulation of release of sequestered calcium ion into cytosol by sarcoplasmic reticulum	RT		3	1.4	0.021	0.49
response to corticosterone	RT		3	1.4	0.021	0.49
negative regulation of peptidyl-threonine phosphorylation	RT		3	1.4	0.021	0.49
positive regulation of stress fiber assembly	RT		4	1.9	0.021	0.49
response to lipid hydroperoxide	RT		2	0.9	0.021	0.49
carbohydrate mediated signaling	RT		2	0.9	0.021	0.49
response to nutrient levels	RT		4	1.9	0.022	0.5
regulation of cardiac muscle contraction	RT		3	1.4	0.023	0.5
positive regulation of bone resorption	RT		3	1.4	0.023	0.5
substrate adhesion-dependent cell spreading	RT		4	1.9	0.024	0.52
wound healing	RT		5	2.3	0.025	0.52
regulation of cardiac muscle contraction by regulation of the release of sequestered calcium ion	RT		3	1.4	0.025	0.52
plasma membrane organization	RT		3	1.4	0.027	0.56
regulation of cell adhesion	RT		4	1.9	0.029	0.57
positive regulation of tumor necrosis factor production	RT		5	2.3	0.029	0.57
positive regulation of cytosolic calcium ion concentration	RT		6	2.8	0.029	0.57
multicellular organism development	RT		7	3.2	0.03	0.57
protein localization to plasma membrane	RT		6	2.8	0.03	0.57
response to calcium ion	RT		4	1.9	0.03	0.57
innate immune response	RT		13	6	0.03	0.57
positive regulation of nitric-oxide synthase activity	RT		3	1.4	0.031	0.57
regulation of protein binding	RT		3	1.4	0.031	0.57
protein stabilization	RT		7	3.2	0.031	0.57
negative regulation of complement activation, alternative pathway	RT		2	0.9	0.032	0.57
glomerular capillary formation	RT		2	0.9	0.032	0.57
ATP export	RT		2	0.9	0.032	0.57
positive regulation of interleukin-1 beta production	RT		4	1.9	0.033	0.58
positive regulation of wound healing	RT		3	1.4	0.034	0.58
adherens junction organization	RT		3	1.4	0.034	0.58
positive regulation of cell-matrix adhesion	RT		3	1.4	0.036	0.61
retinoid metabolic process	RT		3	1.4	0.036	0.61
negative regulation of cysteine-type endopeptidase activity involved in apoptotic process	RT		4	1.9	0.038	0.63
carbohydrate metabolic process	RT		6	2.8	0.038	0.63
peptide cross-linking	RT		3	1.4	0.041	0.65
positive regulation of peptidyl-threonine phosphorylation	RT		3	1.4	0.041	0.65
positive regulation of extracellular exosome assembly	RT		2	0.9	0.042	0.65
positive regulation of type B pancreatic cell proliferation	RT		2	0.9	0.042	0.65
astrocyte activation involved in immune response	RT		2	0.9	0.042	0.65
virion attachment to host cell	RT		2	0.9	0.042	0.65
response to mineralocorticoid	RT		2	0.9	0.042	0.65
positive regulation of protein dephosphorylation	RT		3	1.4	0.043	0.65
antigen processing and presentation of exogenous peptide antigen via MHC class II	RT		3	1.4	0.043	0.65
cellular amino acid metabolic process	RT		3	1.4	0.043	0.65
endodermal cell differentiation	RT		3	1.4	0.043	0.65
positive regulation of DNA binding	RT		3	1.4	0.048	0.72
cell proliferation	RT		6	2.8	0.049	0.72

## Sheet: P7
Biological process enriched by differential proteins by GO (p <0.05)
Term	RT	Genes	Count	%	P-Value	Benjamini
cell adhesion	RT		12	12	8.7e-05	0.071
positive regulation of cell activation	RT		3	3	0.00014	0.071
aging	RT		7	7	0.0004	0.13
liver development	RT		5	5	0.0011	0.27
positive regulation of protein tyrosine kinase activity	RT		4	4	0.0015	0.27
carbohydrate metabolic process	RT		6	6	0.0016	0.27
antimicrobial humoral immune response mediated by antimicrobial peptide	RT		5	5	0.0021	0.27
heterophilic cell-cell adhesion via plasma membrane cell adhesion molecules	RT		4	4	0.0021	0.27
defense response to Gram-positive bacterium	RT		5	5	0.0038	0.39
protein kinase A signaling	RT		3	3	0.0039	0.39
signal transduction	RT		14	14	0.009	0.78
bone morphogenesis	RT		3	3	0.01	0.78
positive regulation of peptidyl-tyrosine phosphorylation	RT		4	4	0.011	0.78
response to hypoxia	RT		5	5	0.013	0.78
cell-cell adhesion	RT		5	5	0.015	0.78
positive regulation of gene expression	RT		8	8	0.015	0.78
cell-matrix adhesion	RT		4	4	0.016	0.78
positive regulation of tumor necrosis factor production	RT		4	4	0.016	0.78
proteolysis	RT		7	7	0.017	0.78
cell surface receptor signaling pathway	RT		6	6	0.017	0.78
positive regulation of inflammatory response	RT		4	4	0.017	0.78
regulation of heart rate by cardiac conduction	RT		3	3	0.018	0.78
regulation of immune response	RT		3	3	0.019	0.78
endocytosis	RT		5	5	0.019	0.78
astrocyte activation involved in immune response	RT		2	2	0.02	0.78
animal organ regeneration	RT		3	3	0.021	0.79
kidney development	RT		4	4	0.022	0.81
positive regulation of nitric oxide biosynthetic process	RT		3	3	0.024	0.84
negative regulation of osteoclast development	RT		2	2	0.024	0.84
positive regulation of ERK1 and ERK2 cascade	RT		5	5	0.026	0.88
positive regulation of cysteine-type endopeptidase activity involved in apoptotic process	RT		3	3	0.029	0.91
bundle of His cell-Purkinje myocyte adhesion involved in cell communication	RT		2	2	0.029	0.91
response to peptide hormone	RT		3	3	0.031	0.94
enzyme linked receptor protein signaling pathway	RT		2	2	0.034	0.95
ventricular compact myocardium morphogenesis	RT		2	2	0.034	0.95
antibacterial humoral response	RT		3	3	0.034	0.95
cellular response to cAMP	RT		3	3	0.035	0.95
angiogenesis	RT		5	5	0.036	0.95
oxaloacetate metabolic process	RT		2	2	0.043	1
malate metabolic process	RT		2	2	0.043	1
positive regulation of MAPK cascade	RT		4	4	0.044	1
positive regulation of cytosolic calcium ion concentration	RT		4	4	0.044	1
cell migration	RT		5	5	0.045	1
regulation of gastrulation	RT		2	2	0.048	1
negative regulation of sodium ion transmembrane transporter activity	RT		2	2	0.048	1
negative regulation of neuron projection development	RT		3	3	0.049	1

## Sheet: P8
Biological process enriched by differential proteins by GO (p <0.05)
Term	RT	Genes	Count	%	P-Value	Benjamini
complement activation, classical pathway	RT		22	5.6	3.7e-14	9.6e-11
innate immune response	RT		40	10.2	7.4e-11	6.5e-08
negative regulation of endopeptidase activity	RT		20	5.1	7.6e-11	6.5e-08
hydrogen peroxide catabolic process	RT		10	2.6	1.9e-09	1.2e-06
protein stabilization	RT		21	5.4	1.4e-08	7.3e-06
adaptive immune response	RT		30	7.7	2.4e-08	1e-05
immunoglobulin production	RT		14	3.6	3.7e-08	1.4e-05
acute-phase response	RT		10	2.6	9.8e-08	3.1e-05
lipoprotein metabolic process	RT		8	2	1.4e-07	4e-05
positive regulation of cholesterol esterification	RT		6	1.5	3.3e-07	8.6e-05
response to hydrogen peroxide	RT		10	2.6	8e-07	0.00019
plasminogen activation	RT		6	1.5	1.2e-06	0.00024
fibrinolysis	RT		7	1.8	1.2e-06	0.00024
cell adhesion	RT		30	7.7	1.8e-06	0.00033
phospholipid efflux	RT		6	1.5	2e-06	0.00034
phagocytosis, engulfment	RT		13	3.3	2.7e-06	0.00043
receptor-mediated endocytosis	RT		11	2.8	2.9e-06	0.00043
proteasomal protein catabolic process	RT		8	2	3.6e-06	0.00051
positive regulation of B cell activation	RT		12	3.1	3.8e-06	0.00052
phagocytosis, recognition	RT		12	3.1	4.2e-06	0.00054
positive regulation of nitric oxide biosynthetic process	RT		9	2.3	4.5e-06	0.00055
blood coagulation	RT		11	2.8	8.6e-06	0.001
positive regulation of CoA-transferase activity	RT		5	1.3	9.6e-06	0.0011
high-density lipoprotein particle remodeling	RT		6	1.5	1e-05	0.0011
binding of sperm to zona pellucida	RT		8	2	1.1e-05	0.0011
cholesterol efflux	RT		7	1.8	1.1e-05	0.0011
immune response	RT		26	6.6	1.5e-05	0.0015
cellular oxidant detoxification	RT		10	2.6	1.9e-05	0.0018
glomerular filtration	RT		6	1.5	2.6e-05	0.0023
positive regulation of establishment of protein localization to telomere	RT		5	1.3	2.8e-05	0.0024
proteolysis	RT		23	5.9	2.9e-05	0.0024
platelet aggregation	RT		8	2	3.4e-05	0.0027
cholesterol metabolic process	RT		10	2.6	3.6e-05	0.0028
positive regulation of protein localization to Cajal body	RT		5	1.3	4.3e-05	0.0032
B cell receptor signaling pathway	RT		12	3.1	6.3e-05	0.0047
endocytosis	RT		15	3.8	6.5e-05	0.0047
proteasomal ubiquitin-independent protein catabolic process	RT		6	1.5	7.1e-05	0.0049
defense response to bacterium	RT		16	4.1	7.3e-05	0.0049
positive regulation of NF-kappaB transcription factor activity	RT		13	3.3	8.2e-05	0.0054
removal of superoxide radicals	RT		5	1.3	9e-05	0.0058
retina homeostasis	RT		7	1.8	0.00014	0.0086
positive regulation of telomerase RNA localization to Cajal body	RT		5	1.3	0.00017	0.01
cell redox homeostasis	RT		7	1.8	0.00021	0.012
positive regulation of heterotypic cell-cell adhesion	RT		5	1.3	0.00022	0.013
oxygen transport	RT		5	1.3	0.00022	0.013
blood coagulation, fibrin clot formation	RT		4	1	0.00025	0.014
reverse cholesterol transport	RT		5	1.3	0.00036	0.02
proteolysis involved in cellular protein catabolic process	RT		7	1.8	0.00037	0.02
peripheral nervous system axon regeneration	RT		4	1	0.00039	0.02
positive regulation of phagocytosis	RT		7	1.8	0.00042	0.021
protein folding	RT		12	3.1	0.0006	0.03
cellular response to heat	RT		7	1.8	0.00064	0.031
triglyceride metabolic process	RT		6	1.5	0.00064	0.031
positive regulation of superoxide anion generation	RT		5	1.3	0.00067	0.032
positive regulation of cell migration	RT		15	3.8	0.00076	0.035
zymogen activation	RT		5	1.3	0.0008	0.037
viral entry into host cell	RT		9	2.3	0.00089	0.04
positive regulation of protein kinase B signaling	RT		10	2.6	0.001	0.045
antibacterial humoral response	RT		7	1.8	0.001	0.045
positive regulation of tumor necrosis factor production	RT		9	2.3	0.0013	0.056
regulation of cell adhesion	RT		7	1.8	0.0013	0.056
response to selenium ion	RT		4	1	0.0014	0.058
high-density lipoprotein particle assembly	RT		4	1	0.0014	0.058
response to calcium ion	RT		7	1.8	0.0014	0.058
platelet activation	RT		7	1.8	0.0016	0.062
glycolytic process	RT		6	1.5	0.0016	0.062
positive regulation of substrate adhesion-dependent cell spreading	RT		6	1.5	0.0016	0.062
toxin transport	RT		6	1.5	0.0016	0.062
aging	RT		12	3.1	0.0017	0.062
positive regulation of interleukin-8 production	RT		7	1.8	0.0017	0.062
animal organ regeneration	RT		6	1.5	0.0018	0.065
response to drug	RT		15	3.8	0.002	0.072
cellular response to oxidative stress	RT		8	2	0.0021	0.073
positive regulation of cell death	RT		6	1.5	0.0022	0.074
lipid transport	RT		8	2	0.0022	0.074
protein oxidation	RT		3	0.8	0.0022	0.074
negative regulation of very-low-density lipoprotein particle remodeling	RT		3	0.8	0.0022	0.074
astrocyte activation involved in immune response	RT		3	0.8	0.0022	0.074
carbon dioxide transport	RT		4	1	0.0023	0.075
phagocytosis	RT		7	1.8	0.0025	0.08
cell migration	RT		14	3.6	0.0028	0.089
proteasome-mediated ubiquitin-dependent protein catabolic process	RT		12	3.1	0.0032	0.1
leukocyte cell-cell adhesion	RT		5	1.3	0.0034	0.1
extrinsic apoptotic signaling pathway	RT		6	1.5	0.0034	0.1
response to reactive oxygen species	RT		4	1	0.0035	0.1
cellular response to steroid hormone stimulus	RT		4	1	0.0035	0.1
low-density lipoprotein particle remodeling	RT		4	1	0.0035	0.1
lipoprotein biosynthetic process	RT		3	0.8	0.0037	0.1
regulation of intestinal cholesterol absorption	RT		3	0.8	0.0037	0.1
scaRNA localization to Cajal body	RT		3	0.8	0.0037	0.1
chylomicron remnant clearance	RT		3	0.8	0.0037	0.1
leukocyte activation	RT		3	0.8	0.0037	0.1
nitric oxide transport	RT		3	0.8	0.0037	0.1
positive regulation of telomerase activity	RT		5	1.3	0.0042	0.11
positive regulation of telomere maintenance via telomerase	RT		5	1.3	0.0042	0.11
positive regulation of MAPK cascade	RT		10	2.6	0.0044	0.12
cholesterol homeostasis	RT		8	2	0.0044	0.12
ATP metabolic process	RT		5	1.3	0.0047	0.12
regulation of inflammatory response	RT		8	2	0.0049	0.12
regulation of protein ubiquitination	RT		4	1	0.0049	0.12
ectopic germ cell programmed cell death	RT		4	1	0.0049	0.12
cell-matrix adhesion	RT		8	2	0.0051	0.13
positive regulation of angiogenesis	RT		10	2.6	0.0051	0.13
induction of bacterial agglutination	RT		3	0.8	0.0055	0.13
antimicrobial humoral immune response mediated by antimicrobial peptide	RT		8	2	0.0057	0.14
negative regulation of cell-substrate adhesion	RT		4	1	0.0057	0.14
regulation of proteasomal protein catabolic process	RT		4	1	0.0057	0.14
integrin-mediated signaling pathway	RT		8	2	0.006	0.14
signal transduction	RT		39	10	0.0061	0.14
response to axon injury	RT		5	1.3	0.0063	0.15
collagen fibril organization	RT		6	1.5	0.0064	0.15
cell-cell adhesion via plasma-membrane adhesion molecules	RT		5	1.3	0.007	0.16
negative regulation of macrophage chemotaxis	RT		3	0.8	0.0075	0.17
glucocorticoid metabolic process	RT		3	0.8	0.0075	0.17
regulation of cholesterol transport	RT		3	0.8	0.0075	0.17
high-density lipoprotein particle clearance	RT		3	0.8	0.0075	0.17
mammary gland involution	RT		3	0.8	0.0075	0.17
response to lead ion	RT		4	1	0.0076	0.17
inflammatory response	RT		17	4.3	0.008	0.17
chaperone-mediated protein folding	RT		5	1.3	0.0083	0.18
negative regulation of neuron death	RT		6	1.5	0.0083	0.18
chaperone-mediated protein complex assembly	RT		4	1	0.0087	0.18
negative regulation of apoptotic process	RT		20	5.1	0.0088	0.18
positive regulation of protein phosphorylation	RT		11	2.8	0.0092	0.19
ubiquitin-dependent protein catabolic process	RT		13	3.3	0.0098	0.19
response to oxidative stress	RT		8	2	0.0099	0.19
positive regulation of endocytosis	RT		4	1	0.0099	0.19
regulation of peptidyl-tyrosine phosphorylation	RT		4	1	0.0099	0.19
opsonization	RT		3	0.8	0.0099	0.19
chaperone-mediated autophagy	RT		3	0.8	0.0099	0.19
regulation of Cdc42 protein signal transduction	RT		3	0.8	0.0099	0.19
macromolecular complex assembly	RT		9	2.3	0.01	0.2
epithelial cell differentiation	RT		7	1.8	0.01	0.2
positive regulation of peptidyl-tyrosine phosphorylation	RT		7	1.8	0.011	0.21
negative regulation of MAP kinase activity	RT		5	1.3	0.012	0.22
positive regulation of NIK/NF-kappaB signaling	RT		6	1.5	0.012	0.23
negative regulation of protein kinase activity	RT		6	1.5	0.012	0.23
positive regulation of exocytosis	RT		4	1	0.012	0.23
protein refolding	RT		4	1	0.012	0.23
myoblast differentiation	RT		4	1	0.012	0.23
positive regulation of tau-protein kinase activity	RT		3	0.8	0.013	0.23
negative regulation of protein metabolic process	RT		3	0.8	0.013	0.23
very-low-density lipoprotein particle remodeling	RT		3	0.8	0.013	0.23
negative regulation of cell growth	RT		8	2	0.013	0.23
muscle cell cellular homeostasis	RT		4	1	0.014	0.25
positive regulation of cholesterol efflux	RT		4	1	0.015	0.27
positive regulation of wound healing	RT		4	1	0.015	0.27
positive regulation of peptide hormone secretion	RT		3	0.8	0.016	0.27
cellular response to unfolded protein	RT		4	1	0.017	0.29
negative regulation of extrinsic apoptotic signaling pathway via death domain receptors	RT		4	1	0.017	0.29
response to ethanol	RT		8	2	0.018	0.3
pentose-phosphate shunt	RT		3	0.8	0.019	0.31
receptor internalization	RT		5	1.3	0.019	0.31
adult locomotory behavior	RT		5	1.3	0.019	0.31
positive regulation of protein secretion	RT		5	1.3	0.019	0.31
carbohydrate metabolic process	RT		9	2.3	0.02	0.33
positive regulation of MAP kinase activity	RT		6	1.5	0.02	0.33
positive regulation of vascular endothelial growth factor production	RT		4	1	0.021	0.33
positive regulation of inflammatory response	RT		7	1.8	0.022	0.35
very-low-density lipoprotein particle assembly	RT		3	0.8	0.022	0.35
endodermal cell differentiation	RT		4	1	0.022	0.35
maintenance of permeability of blood-brain barrier	RT		4	1	0.022	0.35
positive regulation of protein dephosphorylation	RT		4	1	0.022	0.35
positive regulation of phosphorylation	RT		4	1	0.022	0.35
protein processing	RT		6	1.5	0.023	0.35
negative regulation of gene expression	RT		13	3.3	0.023	0.35
response to unfolded protein	RT		5	1.3	0.023	0.35
response to estradiol	RT		7	1.8	0.023	0.35
negative regulation of translation	RT		6	1.5	0.024	0.36
mRNA catabolic process	RT		4	1	0.024	0.37
beta-amyloid clearance	RT		3	0.8	0.026	0.39
cellular iron ion homeostasis	RT		5	1.3	0.027	0.4
angiogenesis	RT		11	2.8	0.028	0.41
positive regulation of cell adhesion	RT		5	1.3	0.028	0.41
positive regulation of erythrocyte differentiation	RT		4	1	0.029	0.41
blood circulation	RT		4	1	0.029	0.41
chaperone mediated protein folding requiring cofactor	RT		4	1	0.029	0.41
fibroblast proliferation	RT		4	1	0.029	0.41
central nervous system development	RT		8	2	0.029	0.41
regulation of axon extension	RT		3	0.8	0.03	0.43
protein dephosphorylation	RT		8	2	0.032	0.46
negative regulation of smooth muscle cell proliferation	RT		4	1	0.033	0.46
axon extension	RT		4	1	0.033	0.46
triglyceride homeostasis	RT		4	1	0.033	0.46
positive regulation of peptidyl-serine phosphorylation	RT		6	1.5	0.033	0.46
negative regulation of DNA damage response, signal transduction by p53 class mediator	RT		3	0.8	0.034	0.46
peptidyl-serine dephosphorylation	RT		3	0.8	0.034	0.46
supramolecular fiber organization	RT		3	0.8	0.034	0.46
positive regulation of ERK1 and ERK2 cascade	RT		10	2.6	0.037	0.5
peptidyl-tyrosine dephosphorylation	RT		4	1	0.038	0.5
protein polymerization	RT		3	0.8	0.038	0.5
interspecies interaction between organisms	RT		3	0.8	0.038	0.5
detection of molecule of bacterial origin	RT		2	0.5	0.039	0.5
negative regulation of cholesterol import	RT		2	0.5	0.039	0.5
methylglyoxal metabolic process	RT		2	0.5	0.039	0.5
negative regulation of membrane tubulation	RT		2	0.5	0.039	0.5
Factor XII activation	RT		2	0.5	0.039	0.5
regulation of histone ubiquitination	RT		2	0.5	0.039	0.5
keratan sulfate catabolic process	RT		2	0.5	0.039	0.5
positive regulation of cytokine production	RT		5	1.3	0.041	0.51
actin filament polymerization	RT		4	1	0.041	0.51
sarcomere organization	RT		4	1	0.041	0.51
placenta development	RT		4	1	0.041	0.51
defense response to Gram-positive bacterium	RT		7	1.8	0.042	0.53
response to mechanical stimulus	RT		5	1.3	0.042	0.53
post-Golgi vesicle-mediated transport	RT		3	0.8	0.043	0.53
complement activation, alternative pathway	RT		3	0.8	0.043	0.53
negative regulation of fatty acid biosynthetic process	RT		3	0.8	0.043	0.53
negative regulation of lipid catabolic process	RT		3	0.8	0.043	0.53
extracellular matrix organization	RT		8	2	0.044	0.54
osteoclast differentiation	RT		4	1	0.046	0.56
response to estrogen	RT		5	1.3	0.046	0.56
regulation of apoptotic process	RT		10	2.6	0.048	0.57
basement membrane organization	RT		3	0.8	0.048	0.57
embryo implantation	RT		4	1	0.049	0.58

## Sheet: P9
Biological process enriched by differential proteins by GO (p <0.05)
Term	RT	Genes	Count	%	P-Value	Benjamini
telomere organization	RT		26	3.2	3.8e-33	1.4e-29
nucleosome assembly	RT		51	6.3	7.4e-32	1.3e-28
DNA replication-dependent nucleosome assembly	RT		25	3.1	2.3e-27	2.7e-24
protein localization to CENP-A containing chromatin	RT		15	1.9	7.8e-17	7.1e-14
DNA replication-independent nucleosome assembly	RT		17	2.1	1.7e-16	1.2e-13
proteolysis	RT		56	7	1.3e-14	7.9e-12
negative regulation of endopeptidase activity	RT		32	4	2.5e-14	1.3e-11
negative regulation of megakaryocyte differentiation	RT		14	1.7	4.5e-14	2e-11
cell adhesion	RT		63	7.8	5e-13	2e-10
antimicrobial humoral immune response mediated by antimicrobial peptide	RT		25	3.1	9.2e-12	3.3e-09
antibacterial humoral response	RT		19	2.4	1e-11	3.4e-09
regulation of gene silencing	RT		10	1.2	1.5e-11	4.5e-09
proteasomal ubiquitin-independent protein catabolic process	RT		13	1.6	1.7e-11	4.7e-09
proteasomal protein catabolic process	RT		15	1.9	2e-11	5.1e-09
multivesicular body assembly	RT		13	1.6	1.3e-09	3.1e-07
chromatin silencing	RT		15	1.9	1.6e-09	3.5e-07
DNA-templated transcription, initiation	RT		14	1.7	2.3e-09	4.9e-07
viral entry into host cell	RT		21	2.6	4.3e-09	8.6e-07
viral budding via host ESCRT complex	RT		11	1.4	4.8e-09	9.2e-07
hydrogen peroxide catabolic process	RT		12	1.5	5.3e-09	9.7e-07
carbohydrate metabolic process	RT		27	3.4	7.4e-09	1.3e-06
defense response to Gram-positive bacterium	RT		23	2.9	1.1e-08	1.8e-06
regulation of gene expression, epigenetic	RT		11	1.4	3.4e-08	5.4e-06
acute-phase response	RT		13	1.6	6.7e-08	1e-05
innate immune response in mucosa	RT		11	1.4	7.9e-08	1.1e-05
keratinocyte differentiation	RT		15	1.9	1.4e-07	2e-05
peptide cross-linking	RT		11	1.4	1.7e-07	2.2e-05
cell migration	RT		32	4	2.2e-07	2.8e-05
ubiquitin-dependent protein catabolic process via the multivesicular body sorting pathway	RT		11	1.4	2.4e-07	3e-05
cell-cell adhesion	RT		26	3.2	2.6e-07	3.1e-05
epidermis development	RT		17	2.1	2.7e-07	3.2e-05
axon guidance	RT		25	3.1	4.3e-07	4.8e-05
positive regulation of nitric oxide biosynthetic process	RT		13	1.6	4.3e-07	4.8e-05
retina homeostasis	RT		12	1.5	4.8e-07	5.2e-05
ESCRT III complex disassembly	RT		7	0.9	8.1e-07	8.4e-05
epithelial cell differentiation	RT		17	2.1	1.1e-06	0.00011
positive regulation of bone resorption	RT		9	1.1	1.4e-06	0.00014
multivesicular body sorting pathway	RT		9	1.1	2.1e-06	0.0002
proteolysis involved in cellular protein catabolic process	RT		12	1.5	3.3e-06	0.00031
nuclear envelope reassembly	RT		8	1	3.8e-06	0.00035
aging	RT		24	3	4.7e-06	0.00041
positive regulation of peptidyl-tyrosine phosphorylation	RT		16	2	6.4e-06	0.00055
positive regulation of kinase activity	RT		14	1.7	6.8e-06	0.00057
homophilic cell adhesion via plasma membrane adhesion molecules	RT		22	2.7	7e-06	0.00058
response to calcium ion	RT		13	1.6	7.4e-06	0.0006
glycolytic process	RT		11	1.4	8.2e-06	0.00065
viral budding from plasma membrane	RT		7	0.9	1e-05	0.00078
platelet aggregation	RT		11	1.4	1.5e-05	0.0012
positive regulation of exosomal secretion	RT		7	0.9	1.6e-05	0.0012
membrane fission	RT		10	1.2	3.1e-05	0.0023
autophagosome maturation	RT		10	1.2	3.9e-05	0.0027
plasminogen activation	RT		6	0.7	4.1e-05	0.0029
blood coagulation	RT		14	1.7	5.4e-05	0.0036
viral release from host cell	RT		7	0.9	5.4e-05	0.0036
signal transduction	RT		81	10.1	5.6e-05	0.0037
positive regulation of substrate adhesion-dependent cell spreading	RT		10	1.2	5.7e-05	0.0037
nucleus organization	RT		8	1	6e-05	0.0037
keratinization	RT		13	1.6	6.1e-05	0.0037
cellular oxidant detoxification	RT		13	1.6	6.1e-05	0.0037
glomerular filtration	RT		7	0.9	7.6e-05	0.0046
plasma membrane repair	RT		8	1	7.8e-05	0.0046
positive regulation of viral release from host cell	RT		5	0.6	8.6e-05	0.005
macroautophagy	RT		12	1.5	9.9e-05	0.0057
substrate adhesion-dependent cell spreading	RT		11	1.4	0.0001	0.0059
substantia nigra development	RT		10	1.2	0.00012	0.0065
proteasome-mediated ubiquitin-dependent protein catabolic process	RT		22	2.7	0.00016	0.0085
negative regulation of blood coagulation	RT		6	0.7	0.00016	0.0085
carbon dioxide transport	RT		6	0.7	0.00016	0.0085
negative regulation of peptidase activity	RT		6	0.7	0.00016	0.0085
positive regulation of ERK1 and ERK2 cascade	RT		23	2.9	0.00017	0.009
multicellular organism development	RT		22	2.7	0.00022	0.011
receptor internalization	RT		10	1.2	0.00022	0.011
heterophilic cell-cell adhesion via plasma membrane cell adhesion molecules	RT		10	1.2	0.00022	0.011
wound healing	RT		14	1.7	0.00027	0.013
viral budding	RT		5	0.6	0.00029	0.014
regulation of cell communication by electrical coupling involved in cardiac conduction	RT		5	0.6	0.00029	0.014
negative regulation of cell death	RT		12	1.5	0.0003	0.014
lung development	RT		13	1.6	0.00031	0.014
peptide catabolic process	RT		6	0.7	0.00033	0.015
protein polymerization	RT		6	0.7	0.00033	0.015
oxygen transport	RT		6	0.7	0.00033	0.015
positive regulation of cell growth	RT		13	1.6	0.00034	0.015
response to mechanical stimulus	RT		11	1.4	0.00035	0.015
cell-matrix adhesion	RT		14	1.7	0.0004	0.017
response to oxidative stress	RT		15	1.9	0.0004	0.017
defense response to Gram-negative bacterium	RT		13	1.6	0.00042	0.018
defense response to fungus	RT		8	1	0.00044	0.018
complement activation, alternative pathway	RT		6	0.7	0.00045	0.018
response to estrogen	RT		11	1.4	0.00045	0.018
angiotensin maturation	RT		5	0.6	0.00047	0.019
killing of cells of other organism	RT		11	1.4	0.00057	0.023
glucuronate catabolic process to xylulose 5-phosphate	RT		4	0.5	0.00063	0.024
ubiquitin-independent protein catabolic process via the multivesicular body sorting pathway	RT		4	0.5	0.00063	0.024
adherens junction organization	RT		7	0.9	0.00063	0.024
cellular aldehyde metabolic process	RT		5	0.6	0.00071	0.026
multivesicular body-lysosome fusion	RT		5	0.6	0.00071	0.026
negative regulation of ryanodine-sensitive calcium-release channel activity	RT		5	0.6	0.00071	0.026
vesicle fusion with vacuole	RT		5	0.6	0.00071	0.026
response to cadmium ion	RT		7	0.9	0.00077	0.028
fibrinolysis	RT		6	0.7	0.00079	0.029
endocytosis	RT		20	2.5	0.00087	0.031
ephrin receptor signaling pathway	RT		9	1.1	0.00097	0.035
glycosaminoglycan catabolic process	RT		5	0.6	0.001	0.036
platelet activation	RT		10	1.2	0.0011	0.038
positive regulation of protein phosphorylation	RT		20	2.5	0.0011	0.038
lysosome organization	RT		9	1.1	0.0011	0.038
extracellular matrix organization	RT		17	2.1	0.0012	0.039
chaperone-mediated protein folding	RT		8	1	0.0012	0.04
response to hydrogen peroxide	RT		9	1.1	0.0013	0.042
positive regulation of superoxide anion generation	RT		6	0.7	0.0013	0.042
regulation of release of sequestered calcium ion into cytosol by sarcoplasmic reticulum	RT		6	0.7	0.0013	0.042
regulation of centrosome duplication	RT		6	0.7	0.0013	0.042
response to ethanol	RT		15	1.9	0.0013	0.042
autophagy	RT		16	2	0.0014	0.043
endodermal cell differentiation	RT		7	0.9	0.0014	0.043
positive regulation of phosphorylation	RT		7	0.9	0.0014	0.043
removal of superoxide radicals	RT		5	0.6	0.0014	0.045
regulation of blood pressure	RT		11	1.4	0.0015	0.045
positive regulation of tumor necrosis factor production	RT		13	1.6	0.0015	0.045
glucose metabolic process	RT		10	1.2	0.0015	0.045
regulation of cell shape	RT		16	2	0.0016	0.047
angiogenesis	RT		22	2.7	0.0016	0.048
non-canonical Wnt signaling pathway	RT		6	0.7	0.0016	0.048
negative regulation of apoptotic process	RT		37	4.6	0.0019	0.056
Wnt signaling pathway, planar cell polarity pathway	RT		7	0.9	0.0019	0.056
cellular response to interleukin-7	RT		5	0.6	0.002	0.056
response to yeast	RT		5	0.6	0.002	0.056
regulation of peptidyl-tyrosine phosphorylation	RT		6	0.7	0.002	0.056
positive regulation of receptor-mediated endocytosis	RT		6	0.7	0.002	0.056
response to lipopolysaccharide	RT		16	2	0.002	0.056
lipid metabolic process	RT		19	2.4	0.002	0.056
receptor-mediated virion attachment to host cell	RT		4	0.5	0.0021	0.057
negative regulation of interferon-gamma production	RT		8	1	0.0021	0.057
positive regulation of protein serine/threonine kinase activity	RT		10	1.2	0.0023	0.061
fibroblast growth factor receptor signaling pathway	RT		9	1.1	0.0023	0.061
positive regulation of protein tyrosine kinase activity	RT		8	1	0.0024	0.064
regulation of mitotic spindle assembly	RT		6	0.7	0.0024	0.065
ATP metabolic process	RT		7	0.9	0.0026	0.069
positive regulation of cell migration	RT		22	2.7	0.0027	0.071
positive regulation of cell death	RT		8	1	0.0027	0.071
complement activation	RT		6	0.7	0.003	0.076
transmembrane receptor protein tyrosine kinase signaling pathway	RT		14	1.7	0.003	0.077
response to zinc ion	RT		7	0.9	0.003	0.077
one-carbon metabolic process	RT		7	0.9	0.003	0.077
autocrine signaling	RT		4	0.5	0.0032	0.08
regulation of high voltage-gated calcium channel activity	RT		4	0.5	0.0032	0.08
response to copper ion	RT		5	0.6	0.0033	0.081
membrane budding	RT		5	0.6	0.0033	0.081
response to hypoxia	RT		17	2.1	0.0033	0.081
positive regulation of phagocytosis	RT		8	1	0.0039	0.094
response to nutrient	RT		10	1.2	0.0039	0.095
receptor-mediated endocytosis	RT		10	1.2	0.0043	0.1
response to drug	RT		23	2.9	0.0044	0.1
protein folding	RT		16	2	0.0045	0.11
cell-cell junction assembly	RT		7	0.9	0.0046	0.11
positive regulation of ryanodine-sensitive calcium-release channel activity	RT		4	0.5	0.0047	0.11
late endosomal microautophagy	RT		3	0.4	0.0048	0.11
establishment of protein localization to mitochondrial membrane	RT		3	0.4	0.0048	0.11
protein targeting to lysosome involved in chaperone-mediated autophagy	RT		3	0.4	0.0048	0.11
intermediate filament organization	RT		9	1.1	0.0052	0.12
response to interleukin-1	RT		7	0.9	0.0052	0.12
late endosome to lysosome transport	RT		5	0.6	0.0053	0.12
cellular response to lipopolysaccharide	RT		17	2.1	0.0056	0.12
peptidyl-tyrosine phosphorylation	RT		14	1.7	0.0056	0.12
inflammatory response	RT		29	3.6	0.0059	0.13
positive regulation of cysteine-type endopeptidase activity involved in apoptotic process	RT		8	1	0.006	0.13
positive regulation of endothelial cell migration	RT		9	1.1	0.0062	0.13
positive regulation of T cell migration	RT		5	0.6	0.0064	0.14
glial cell migration	RT		4	0.5	0.0065	0.14
negative regulation of myeloid cell apoptotic process	RT		4	0.5	0.0065	0.14
endosome transport via multivesicular body sorting pathway	RT		4	0.5	0.0065	0.14
positive regulation by host of viral genome replication	RT		4	0.5	0.0065	0.14
mitotic metaphase plate congression	RT		7	0.9	0.0067	0.14
membrane fusion	RT		7	0.9	0.0067	0.14
positive regulation of peptidyl-threonine phosphorylation	RT		6	0.7	0.0067	0.14
response to peptide hormone	RT		8	1	0.0073	0.15
positive regulation of NIK/NF-kappaB signaling	RT		9	1.1	0.0074	0.15
ossification	RT		10	1.2	0.0076	0.15
positive regulation of protein dephosphorylation	RT		6	0.7	0.0077	0.16
iron ion homeostasis	RT		7	0.9	0.0084	0.17
response to pH	RT		4	0.5	0.0086	0.17
protein stabilization	RT		18	2.2	0.0087	0.17
cell proliferation	RT		16	2	0.0087	0.17
positive regulation of fibroblast proliferation	RT		8	1	0.0089	0.17
cellular iron ion homeostasis	RT		8	1	0.0089	0.17
leukocyte cell-cell adhesion	RT		6	0.7	0.0089	0.17
animal organ regeneration	RT		7	0.9	0.0093	0.18
lysosomal lumen acidification	RT		5	0.6	0.0093	0.18
positive regulation of extracellular exosome assembly	RT		3	0.4	0.0094	0.18
regulation of beta-amyloid clearance	RT		3	0.4	0.0094	0.18
muscular septum morphogenesis	RT		3	0.4	0.0094	0.18
positive regulation of cell activation	RT		3	0.4	0.0094	0.18
response to xenobiotic stimulus	RT		19	2.4	0.01	0.19
zymogen activation	RT		5	0.6	0.011	0.21
late endosome to vacuole transport via multivesicular body sorting pathway	RT		4	0.5	0.011	0.21
cellular response to beta-amyloid	RT		7	0.9	0.011	0.21
positive regulation of endocytosis	RT		5	0.6	0.013	0.24
regulation of cardiac muscle contraction by regulation of the release of sequestered calcium ion	RT		5	0.6	0.013	0.24
positive regulation of protein catabolic process	RT		10	1.2	0.013	0.24
ossification involved in bone maturation	RT		4	0.5	0.014	0.25
beta-amyloid clearance	RT		4	0.5	0.014	0.25
positive regulation of NF-kappaB transcription factor activity	RT		14	1.7	0.014	0.26
positive regulation of inflammatory response	RT		11	1.4	0.015	0.26
positive regulation of insulin receptor signaling pathway	RT		5	0.6	0.015	0.26
positive regulation of smooth muscle cell migration	RT		5	0.6	0.015	0.26
protein import	RT		3	0.4	0.015	0.26
cellular response to indole-3-methanol	RT		3	0.4	0.015	0.26
regulation of cardiac muscle cell action potential	RT		3	0.4	0.015	0.26
negative regulation of calcium ion export from cell	RT		3	0.4	0.015	0.26
nitric oxide transport	RT		3	0.4	0.015	0.26
positive regulation of cyclic-nucleotide phosphodiesterase activity	RT		3	0.4	0.015	0.26
regulation of cyclase activity	RT		3	0.4	0.015	0.26
positive regulation of pinocytosis	RT		3	0.4	0.015	0.26
positive regulation of amyloid fibril formation	RT		3	0.4	0.015	0.26
peptidyl-cysteine S-nitrosylation	RT		3	0.4	0.015	0.26
regulation of cytokine production	RT		7	0.9	0.015	0.26
positive regulation of MAP kinase activity	RT		9	1.1	0.016	0.27
positive regulation of interleukin-1 beta production	RT		8	1	0.016	0.27
female pregnancy	RT		10	1.2	0.016	0.27
positive regulation of protein autophosphorylation	RT		5	0.6	0.017	0.28
peptide metabolic process	RT		4	0.5	0.017	0.28
positive regulation of cellular protein catabolic process	RT		4	0.5	0.017	0.28
adult locomotory behavior	RT		7	0.9	0.018	0.3
neuron projection morphogenesis	RT		8	1	0.019	0.3
response to glucocorticoid	RT		8	1	0.019	0.3
cholesterol metabolic process	RT		9	1.1	0.019	0.31
positive regulation of nitric-oxide synthase activity	RT		5	0.6	0.02	0.31
cellular sodium ion homeostasis	RT		5	0.6	0.02	0.31
regulation of cytoskeleton organization	RT		5	0.6	0.02	0.31
regulation of protein binding	RT		5	0.6	0.02	0.31
regulation of calcium ion transport	RT		5	0.6	0.02	0.31
positive regulation of actin filament polymerization	RT		7	0.9	0.02	0.31
actin filament polymerization	RT		6	0.7	0.02	0.31
negative regulation of protein complex assembly	RT		6	0.7	0.02	0.31
cell-cell adhesion via plasma-membrane adhesion molecules	RT		6	0.7	0.02	0.31
negative regulation of transforming growth factor beta receptor signaling pathway	RT		10	1.2	0.021	0.32
postsynaptic actin cytoskeleton organization	RT		4	0.5	0.021	0.32
negative regulation of activated T cell proliferation	RT		4	0.5	0.021	0.32
positive regulation of viral entry into host cell	RT		4	0.5	0.021	0.32
regulation of synaptic vesicle endocytosis	RT		4	0.5	0.021	0.32
wound healing, spreading of cells	RT		4	0.5	0.021	0.32
response to heat	RT		7	0.9	0.022	0.32
response to insulin	RT		9	1.1	0.022	0.32
negative regulation of coagulation	RT		3	0.4	0.022	0.32
regulation of systemic arterial blood pressure by renin-angiotensin	RT		3	0.4	0.022	0.32
glycoside catabolic process	RT		3	0.4	0.022	0.32
regulation of protein localization to membrane	RT		3	0.4	0.022	0.32
binding of sperm to zona pellucida	RT		6	0.7	0.022	0.32
nucleobase-containing compound metabolic process	RT		6	0.7	0.022	0.32
protein catabolic process	RT		8	1	0.023	0.34
phagocytosis	RT		8	1	0.023	0.34
tumor necrosis factor-mediated signaling pathway	RT		7	0.9	0.024	0.34
bone development	RT		7	0.9	0.024	0.34
skeletal system development	RT		12	1.5	0.024	0.34
osteoclast differentiation	RT		6	0.7	0.025	0.35
positive regulation of phosphoprotein phosphatase activity	RT		4	0.5	0.025	0.35
positive regulation of sodium ion transport	RT		4	0.5	0.025	0.35
low-density lipoprotein particle remodeling	RT		4	0.5	0.025	0.35
metabolic process	RT		4	0.5	0.025	0.35
synaptic vesicle lumen acidification	RT		4	0.5	0.025	0.35
response to reactive oxygen species	RT		4	0.5	0.025	0.35
regulation of blood vessel diameter	RT		5	0.6	0.026	0.35
negative regulation of interleukin-2 production	RT		5	0.6	0.026	0.35
liver regeneration	RT		6	0.7	0.027	0.37
positive regulation of neuron death	RT		6	0.7	0.029	0.4
post-Golgi vesicle-mediated transport	RT		4	0.5	0.03	0.4
cellular response to chemokine	RT		4	0.5	0.03	0.4
complement activation, classical pathway	RT		11	1.4	0.03	0.4
positive regulation of respiratory burst	RT		3	0.4	0.03	0.4
heparan sulfate proteoglycan catabolic process	RT		3	0.4	0.03	0.4
response to angiotensin	RT		3	0.4	0.03	0.4
response to L-ascorbic acid	RT		3	0.4	0.03	0.4
positive regulation of viral life cycle	RT		3	0.4	0.03	0.4
apical junction assembly	RT		3	0.4	0.03	0.4
negative regulation of calcium ion transmembrane transporter activity	RT		3	0.4	0.03	0.4
osteoblast differentiation	RT		11	1.4	0.031	0.41
cellular response to hormone stimulus	RT		5	0.6	0.032	0.42
microglial cell activation	RT		5	0.6	0.032	0.42
regulation of signal transduction	RT		7	0.9	0.032	0.42
cell redox homeostasis	RT		6	0.7	0.032	0.42
liver development	RT		9	1.1	0.034	0.43
G2/M transition of mitotic cell cycle	RT		7	0.9	0.035	0.44
response to steroid hormone	RT		4	0.5	0.035	0.44
carboxylic acid metabolic process	RT		4	0.5	0.035	0.44
reverse cholesterol transport	RT		4	0.5	0.035	0.44
synaptic vesicle endocytosis	RT		6	0.7	0.035	0.44
positive regulation of canonical Wnt signaling pathway	RT		10	1.2	0.035	0.45
bone morphogenesis	RT		5	0.6	0.036	0.45
positive regulation of collagen biosynthetic process	RT		5	0.6	0.036	0.45
response to radiation	RT		5	0.6	0.036	0.45
actin cytoskeleton reorganization	RT		7	0.9	0.037	0.46
response to estradiol	RT		10	1.2	0.039	0.47
positive regulation of phospholipase activity	RT		3	0.4	0.039	0.47
nucleobase-containing small molecule interconversion	RT		3	0.4	0.039	0.47
methionine biosynthetic process	RT		3	0.4	0.039	0.47
negative regulation of protein dephosphorylation	RT		3	0.4	0.039	0.47
luteinization	RT		3	0.4	0.039	0.47
lysosomal protein catabolic process	RT		3	0.4	0.039	0.47
plasma membrane to endosome transport	RT		3	0.4	0.039	0.47
positive regulation of CoA-transferase activity	RT		3	0.4	0.039	0.47
response to methylmercury	RT		3	0.4	0.039	0.47
L-phenylalanine catabolic process	RT		3	0.4	0.039	0.47
negative regulation of platelet activation	RT		3	0.4	0.039	0.47
chaperone-mediated autophagy	RT		3	0.4	0.039	0.47
purine ribonucleoside salvage	RT		3	0.4	0.039	0.47
cellular response to increased oxygen levels	RT		3	0.4	0.039	0.47
regulation of ryanodine-sensitive calcium-release channel activity	RT		4	0.5	0.04	0.47
N-glycan processing	RT		4	0.5	0.04	0.47
axon regeneration	RT		4	0.5	0.04	0.47
glutathione metabolic process	RT		6	0.7	0.041	0.48
tricarboxylic acid cycle	RT		5	0.6	0.044	0.51
positive regulation of DNA binding	RT		5	0.6	0.044	0.51
negative regulation of T cell proliferation	RT		6	0.7	0.045	0.52
negative regulation of neuron death	RT		7	0.9	0.045	0.52
apoptotic cell clearance	RT		4	0.5	0.046	0.52
iron ion transport	RT		4	0.5	0.046	0.52
positive regulation of JNK cascade	RT		9	1.1	0.046	0.53
macromolecular complex assembly	RT		12	1.5	0.046	0.53
protein processing	RT		8	1	0.049	0.55
mannose metabolic process	RT		3	0.4	0.049	0.55
oxaloacetate metabolic process	RT		3	0.4	0.049	0.55
positive regulation of protein localization to early endosome	RT		3	0.4	0.049	0.55
cellular response to oxygen-glucose deprivation	RT		3	0.4	0.049	0.55
very-low-density lipoprotein particle remodeling	RT		3	0.4	0.049	0.55
negative regulation of dendritic cell apoptotic process	RT		3	0.4	0.049	0.55
ovulation cycle	RT		3	0.4	0.049	0.55
positive regulation of tau-protein kinase activity	RT		3	0.4	0.049	0.55
