# Supplementary material for: Urinary proteome comparison in modified electroconvulsive therapy in depression disorder：new approach in the therapeutic mechanism
Source: Research Square preprint supplement (doi:10.21203/rs.3.rs-6664029/v1), 2025-05-23
Supplement: Supplementary file 3 [file 7eb4a0f00df65ef572a0ee5f.xlsx]

## Sheet: unique peptide ≥2
PG.ProteinAccessions	PG.Genes	PG.ProteinDescriptions	PG.ProteinNames	PG.Qvalue	[1] 1.raw.PG.NrOfStrippedSequencesMeasured	[2] 1_220704104321.raw.PG.NrOfStrippedSequencesMeasured	[3] 1_220707180103.raw.PG.NrOfStrippedSequencesMeasured	[4] 2.raw.PG.NrOfStrippedSequencesMeasured	[5] 2_220704164124.raw.PG.NrOfStrippedSequencesMeasured	[6] 2_220707202757.raw.PG.NrOfStrippedSequencesMeasured	[7] 3.raw.PG.NrOfStrippedSequencesMeasured	[8] 3_220704141512.raw.PG.NrOfStrippedSequencesMeasured	[9] 3_220707225512.raw.PG.NrOfStrippedSequencesMeasured	[10] 4.raw.PG.NrOfStrippedSequencesMeasured	[11] 4_220704190757.raw.PG.NrOfStrippedSequencesMeasured	[12] 4_220708012202.raw.PG.NrOfStrippedSequencesMeasured	[13] 5.raw.PG.NrOfStrippedSequencesMeasured	[14] 5_220710150123.raw.PG.NrOfStrippedSequencesMeasured	[15] 5_220711002714.raw.PG.NrOfStrippedSequencesMeasured	[16] 6.raw.PG.NrOfStrippedSequencesMeasured	[17] 6_220707130648.raw.PG.NrOfStrippedSequencesMeasured	[18] 6_220711025435.raw.PG.NrOfStrippedSequencesMeasured	[19] 7.raw.PG.NrOfStrippedSequencesMeasured	[20] 7_220705063501.raw.PG.NrOfStrippedSequencesMeasured	[21] 7_220708061621.raw.PG.NrOfStrippedSequencesMeasured	[22] 8.raw.PG.NrOfStrippedSequencesMeasured	[23] 8_220703011008.raw.PG.NrOfStrippedSequencesMeasured	[24] 8_220708084313.raw.PG.NrOfStrippedSequencesMeasured	[25] 9.raw.PG.NrOfStrippedSequencesMeasured	[26] 9_220706004842.raw.PG.NrOfStrippedSequencesMeasured	[27] 9_220708111018.raw.PG.NrOfStrippedSequencesMeasured	[28] 10.raw.PG.NrOfStrippedSequencesMeasured	[29] 10_220705123356.raw.PG.NrOfStrippedSequencesMeasured	[30] 10_220708133746.raw.PG.NrOfStrippedSequencesMeasured	[31] 11.raw.PG.NrOfStrippedSequencesMeasured	[32] 11_220705150048.raw.PG.NrOfStrippedSequencesMeasured	[33] 11_220708160439.raw.PG.NrOfStrippedSequencesMeasured	[34] 12.raw.PG.NrOfStrippedSequencesMeasured	[35] 12_220705172759.raw.PG.NrOfStrippedSequencesMeasured	[36] 12_220708183135.raw.PG.NrOfStrippedSequencesMeasured	[37] 13.raw.PG.NrOfStrippedSequencesMeasured	[38] 13_220705195453.raw.PG.NrOfStrippedSequencesMeasured	[39] 13_220708205845.raw.PG.NrOfStrippedSequencesMeasured	[40] 14.raw.PG.NrOfStrippedSequencesMeasured	[41] 14_220706031536.raw.PG.NrOfStrippedSequencesMeasured	[42] 14_220711124550.raw.PG.NrOfStrippedSequencesMeasured	[43] 15.raw.PG.NrOfStrippedSequencesMeasured	[44] 15_220706054230.raw.PG.NrOfStrippedSequencesMeasured	[45] 15_220711151403.raw.PG.NrOfStrippedSequencesMeasured
A0A075B6H9	IGLV4-69	Immunoglobulin lambda variable 4-69	LV469_HUMAN	1.12e-08	3	3	0	3	3	3	0	3	3	3	3	3	3	3	3	3	3	3	3	0	0	3	3	3	3	3	3	3	3	3	0	0	0	3	3	3	3	3	0	3	3	3	3	0	3
A0A075B6I0	IGLV8-61	Immunoglobulin lambda variable 8-61	LV861_HUMAN	7.06e-11	2	2	2	2	2	2	2	2	2	2	2	2	2	2	2	2	2	2	2	2	0	2	2	2	2	2	2	2	2	2	2	2	0	0	2	0	2	2	2	2	2	2	2	2	2
A0A075B6J9	IGLV2-18	Immunoglobulin lambda variable 2-18	LV218_HUMAN	1.91e-22	2	2	2	2	2	2	2	2	2	2	2	2	2	2	2	2	2	2	2	0	2	2	2	2	2	2	2	2	2	2	2	2	2	2	2	2	2	2	2	2	2	2	2	2	0
A0A075B6K4	IGLV3-10	Immunoglobulin lambda variable 3-10	LV310_HUMAN	8.51e-17	3	3	3	3	3	3	3	3	3	3	3	3	3	3	3	3	3	3	3	3	3	3	3	3	3	3	3	3	3	3	3	3	3	3	3	3	3	3	3	3	3	3	3	3	3
A0A075B6K5	IGLV3-9	Immunoglobulin lambda variable 3-9	LV39_HUMAN	1.42e-19	2	2	2	2	2	2	0	2	0	2	2	2	2	0	2	2	2	2	2	0	0	2	2	2	2	2	2	2	2	2	2	2	0	2	2	2	2	2	2	2	2	2	2	2	2
A0A075B6P5;P01615	IGKV2-28;IGKV2D-28	Immunoglobulin kappa variable 2-28;Immunoglobulin kappa variable 2D-28	KV228_HUMAN;KVD28_HUMAN	5.47e-22	2	2	2	2	2	2	0	0	2	2	2	2	2	2	2	2	2	2	2	0	0	2	2	2	2	2	2	2	2	2	2	2	0	2	2	2	2	2	2	2	2	2	2	2	2
A0A075B6Q5	IGHV3-64	Immunoglobulin heavy variable 3-64	HV364_HUMAN	1.6e-16	2	2	2	2	2	2	0	2	0	2	2	2	2	2	2	2	2	2	2	0	0	2	2	2	2	2	2	2	2	2	2	0	0	2	2	2	2	2	2	0	0	0	2	0	0
A0A087WSX0	IGLV5-45	Immunoglobulin lambda variable 5-45	LV545_HUMAN	4.55e-21	2	2	2	2	2	2	0	2	0	2	2	2	2	2	2	2	2	2	2	0	0	2	2	2	2	2	2	2	2	2	0	2	0	2	2	2	2	2	2	0	0	0	2	0	0
A0A0A0MRZ8;P04433	IGKV3D-11;IGKV3-11	Immunoglobulin kappa variable 3D-11;Immunoglobulin kappa variable 3-11	KVD11_HUMAN;KV311_HUMAN	9.68e-13	2	2	2	2	2	2	2	2	2	2	2	2	2	2	2	2	2	2	2	2	2	2	2	2	2	2	2	2	2	2	2	2	2	2	2	2	2	2	2	2	2	2	2	2	2
A0A0A0MS15	IGHV3-49	Immunoglobulin heavy variable 3-49	HV349_HUMAN	2.44e-22	3	3	3	3	3	3	0	3	0	3	3	3	3	3	3	3	3	3	3	3	3	3	3	3	3	3	3	3	3	3	3	3	0	3	3	3	3	3	3	3	3	3	3	3	3
A0A0B4J1U7	IGHV6-1	Immunoglobulin heavy variable 6-1	HV601_HUMAN	2.94e-13	3	3	3	3	3	3	3	3	3	3	3	3	3	3	3	3	3	3	3	0	0	3	3	3	3	3	3	3	3	3	3	3	0	3	3	3	3	3	3	3	3	3	3	3	3
A0A0B4J1V0	IGHV3-15	Immunoglobulin heavy variable 3-15	HV315_HUMAN	1.12e-26	3	3	3	3	3	3	0	3	3	3	3	3	3	3	3	3	3	3	3	0	3	3	3	3	3	3	3	3	3	3	3	3	3	3	3	3	3	3	3	3	3	0	3	0	0
A0A0B4J1V2	IGHV2-26	Immunoglobulin heavy variable 2-26	HV226_HUMAN	1.27e-08	2	0	2	2	2	2	0	0	0	2	2	2	2	2	2	0	2	0	2	0	0	2	2	2	2	2	0	2	2	2	0	0	0	2	2	2	0	0	0	0	0	0	2	0	0
A0A0B4J1V6	IGHV3-73	Immunoglobulin heavy variable 3-73	HV373_HUMAN	2.25e-15	4	4	4	4	4	4	4	4	4	4	4	4	4	4	4	4	4	4	4	4	4	4	4	4	4	4	4	4	4	4	4	4	0	4	4	4	4	4	4	4	4	4	4	4	4
A0A0B4J1X5	IGHV3-74	Immunoglobulin heavy variable 3-74	HV374_HUMAN	1.07e-14	2	2	2	2	2	2	2	2	2	2	2	2	2	2	2	2	2	2	2	2	2	2	2	2	2	2	2	2	2	2	2	2	2	2	2	2	2	2	2	2	2	2	2	2	2
A0A0B4J1Y8	IGLV9-49	Immunoglobulin lambda variable 9-49	LV949_HUMAN	1.82e-15	0	0	0	2	2	2	2	0	0	2	2	2	2	2	2	2	2	2	2	0	0	0	0	0	2	2	2	2	2	2	0	0	0	2	2	2	2	2	2	0	0	0	2	0	0
A0A0B4J1Y9	IGHV3-72	Immunoglobulin heavy variable 3-72	HV372_HUMAN	8.71e-19	3	3	3	3	3	3	3	3	3	3	3	3	3	3	3	3	3	3	3	0	0	3	3	3	3	3	3	3	3	3	3	3	0	3	3	3	3	3	3	3	3	3	3	3	3
A0A0C4DH29	IGHV1-3	Immunoglobulin heavy variable 1-3	HV103_HUMAN	7.12e-23	2	2	2	2	2	2	2	2	2	2	2	2	2	2	2	2	2	2	2	0	2	2	2	2	2	2	2	2	2	2	2	0	0	2	2	2	2	2	2	2	0	2	2	2	2
A0A0C4DH38	IGHV5-51	Immunoglobulin heavy variable 5-51	HV551_HUMAN	2.09e-17	2	2	2	2	2	2	0	0	0	2	2	2	2	2	2	0	0	0	2	0	0	2	2	2	2	2	2	2	2	2	2	0	0	2	2	2	0	0	2	2	2	0	2	0	0
A0A0C4DH41;P01824;P01825;P06331;P0DP06;P0DP08	IGHV4-61;IGHV4-39;IGHV4-59;IGHV4-34;IGHV4-30-4;IGHV4-38-2	Immunoglobulin heavy variable 4-61;Immunoglobulin heavy variable 4-39;Immunoglobulin heavy variable 4-59;Immunoglobulin heavy variable 4-34;Immunoglobulin heavy variable 4-30-4;Immunoglobulin heavy variable 4-38-2	HV461_HUMAN;HV439_HUMAN;HV459_HUMAN;HV434_HUMAN;HVD34_HUMAN;HVD82_HUMAN	1.59e-22	3	3	3	3	3	3	0	3	0	3	3	3	3	3	3	3	3	3	3	0	0	3	3	3	3	3	3	3	3	3	3	3	3	3	3	3	3	3	3	3	0	3	3	3	3
A0A0C4DH43	IGHV2-70D	Immunoglobulin heavy variable 2-70D	HV70D_HUMAN	2.27e-08	2	2	2	2	2	2	0	0	2	2	2	2	2	2	2	2	2	2	2	0	0	2	2	2	2	2	0	0	0	2	0	0	0	2	2	2	0	0	0	0	0	0	2	0	0
A0A0C4DH68	IGKV2-24	Immunoglobulin kappa variable 2-24	KV224_HUMAN	1.09e-21	2	2	2	2	2	2	0	2	0	2	2	2	2	2	2	2	2	2	2	2	0	2	2	2	2	2	2	2	2	2	0	2	0	2	2	2	2	2	2	2	2	2	2	2	2
A0A0J9YX35	IGHV3-64D	Immunoglobulin heavy variable 3-64D	HV64D_HUMAN	6.44e-19	2	2	2	2	2	2	0	0	0	2	2	2	2	2	2	2	2	2	2	0	0	2	2	2	2	2	2	2	2	2	2	2	0	2	2	2	2	2	2	2	2	0	2	2	0
A0A0J9YXX1	IGHV5-10-1	Immunoglobulin heavy variable 5-10-1	HV5X1_HUMAN	2.19e-20	3	3	3	3	3	3	3	3	3	3	3	3	3	3	3	3	3	3	3	0	0	3	3	3	3	3	3	3	3	3	3	3	0	3	3	3	3	3	3	3	0	0	3	0	0
A0AVT1	UBA6	Ubiquitin-like modifier-activating enzyme 6	UBA6_HUMAN	5.32e-12	0	0	0	5	0	0	0	0	0	0	0	0	5	5	5	0	0	0	0	0	0	0	0	0	5	5	5	5	5	5	0	0	0	5	5	5	0	5	0	5	0	0	5	5	0
A0M8Q6	IGLC7	Immunoglobulin lambda constant 7	IGLC7_HUMAN	1.36e-14	3	3	3	3	3	3	3	3	3	3	3	3	3	3	3	3	3	3	3	3	3	3	3	3	3	3	3	3	3	3	3	3	0	3	3	3	3	3	3	3	3	3	3	3	3
A1A5C7	SLC22A23	Solute carrier family 22 member 23	S22AN_HUMAN	7.54e-07	2	2	2	0	0	0	2	2	2	2	0	0	0	0	2	2	2	0	2	2	2	0	2	0	2	2	2	2	2	2	2	2	0	2	0	0	0	0	2	2	2	2	2	2	2
A1A5D9	BICDL2	BICD family-like cargo adapter 2	BICL2_HUMAN	8.65e-14	8	8	8	8	8	8	8	8	8	8	8	8	8	8	8	8	8	0	8	0	0	8	8	8	8	8	8	8	8	8	8	8	0	8	8	8	8	8	8	8	8	8	8	8	8
A1E959	ODAM	Odontogenic ameloblast-associated protein	ODAM_HUMAN	1.32e-16	2	2	0	2	0	0	2	2	2	2	2	0	0	0	2	2	2	2	2	2	2	2	2	0	2	0	2	2	2	2	2	2	2	2	2	2	2	2	2	2	2	0	2	0	0
A1L4H1	SSC5D	Soluble scavenger receptor cysteine-rich domain-containing protein SSC5D	SRCRL_HUMAN	3.95e-05	2	0	2	0	0	2	2	2	2	2	2	2	2	0	0	2	0	0	0	2	2	2	2	2	0	2	0	2	2	2	2	0	0	2	2	2	0	2	2	0	2	0	2	0	2
A2NJV5	IGKV2-29	Immunoglobulin kappa variable 2-29	KV229_HUMAN	3.39e-27	4	4	4	4	4	4	4	4	4	4	4	4	4	4	4	4	4	4	4	4	4	4	4	4	4	4	4	4	4	4	4	4	4	4	4	4	4	4	4	4	4	4	4	4	4
A6ND91	ASPDH	Putative L-aspartate dehydrogenase	ASPD_HUMAN	4.09e-11	4	4	0	0	4	4	0	0	0	4	4	4	4	4	4	0	0	0	4	0	0	4	0	0	4	4	4	4	4	4	0	4	0	4	4	4	4	4	4	0	0	0	4	0	0
A6NFQ2	TCAF2	TRPM8 channel-associated factor 2	TCAF2_HUMAN	1.07e-06	0	0	0	0	0	0	0	0	0	0	0	0	2	2	2	0	0	0	0	0	0	0	0	0	0	0	0	2	2	2	0	0	0	2	0	0	0	0	0	0	0	0	0	0	0
A6NGN9	IGLON5	IgLON family member 5	IGLO5_HUMAN	7.27e-16	2	2	2	2	2	2	2	2	2	2	2	2	2	2	2	2	2	2	2	2	0	2	2	2	2	2	2	2	2	2	0	2	0	2	2	2	2	2	2	0	0	2	2	2	0
A6NI73	LILRA5	Leukocyte immunoglobulin-like receptor subfamily A member 5	LIRA5_HUMAN	2.66e-20	5	5	5	5	5	5	5	5	5	5	5	5	5	5	5	5	5	5	5	5	5	5	5	5	5	5	5	5	5	5	5	5	0	5	5	5	5	5	5	5	5	5	5	5	5
A6NL88	SHISA7	Protein shisa-7	SHSA7_HUMAN	1.4e-12	3	3	3	3	3	3	3	3	3	3	3	3	3	3	3	3	3	3	3	0	0	3	3	3	3	3	3	3	3	3	3	3	3	3	3	3	3	3	3	3	3	3	3	3	3
A8K2U0	A2ML1	Alpha-2-macroglobulin-like protein 1	A2ML1_HUMAN	5.98e-29	48	48	48	48	48	48	48	48	48	48	48	48	48	48	48	48	48	48	48	48	48	48	48	48	48	48	48	48	48	48	48	48	48	48	48	48	48	48	48	48	48	48	48	48	48
A8MVW5	HEPACAM2	HEPACAM family member 2	HECA2_HUMAN	6.33e-21	2	2	2	2	2	2	2	2	2	2	2	2	2	0	2	2	2	2	2	2	0	2	2	2	2	2	2	2	2	2	2	0	0	2	2	2	2	2	2	2	2	2	2	2	2
B3EWG3;B3EWG5;B3EWG6	FAM25A;FAM25C;FAM25G	Protein FAM25A;Protein FAM25C;Protein FAM25G	FM25A_HUMAN;FM25C_HUMAN;FM25G_HUMAN	1.82e-17	4	4	4	0	0	0	0	0	0	4	4	4	4	4	4	4	4	4	4	0	0	4	4	0	4	4	4	4	4	0	4	0	0	4	4	4	4	0	0	4	0	0	4	0	0
E9PAV3	NACA	Nascent polypeptide-associated complex subunit alpha, muscle-specific form	NACAM_HUMAN	4.56e-20	5	5	5	5	5	0	5	5	0	5	5	5	5	5	5	5	5	5	5	5	5	5	5	5	5	5	5	5	5	5	5	5	0	5	5	5	0	5	0	5	0	0	5	0	5
iRT_Peptides_Fusion;iRT-Kit_WR_fusion				1.19e-18	11	11	11	11	11	11	11	11	11	11	11	11	11	11	11	11	11	11	11	11	11	11	11	11	11	11	11	11	11	11	11	11	11	11	11	11	11	11	11	11	11	11	11	11	11
O00115	DNASE2	Deoxyribonuclease-2-alpha	DNS2A_HUMAN	3.01e-22	6	6	6	6	6	6	6	6	6	6	6	6	6	6	6	6	6	6	6	6	6	6	6	6	6	6	6	6	6	6	6	6	6	6	6	6	6	6	6	6	6	6	6	6	6
O00144	FZD9	Frizzled-9	FZD9_HUMAN	5.35e-23	2	2	2	2	2	2	0	0	0	2	2	2	0	2	2	0	0	0	2	0	0	2	2	2	2	2	2	2	2	2	0	0	0	2	2	2	2	2	2	0	0	0	2	0	0
O00151	PDLIM1	PDZ and LIM domain protein 1	PDLI1_HUMAN	1.88e-21	4	4	4	4	4	4	0	4	0	4	4	0	4	4	4	0	0	0	4	4	4	4	4	4	4	4	4	4	4	4	4	0	0	4	4	4	4	4	0	4	0	0	4	0	0
O00159	MYO1C	Unconventional myosin-Ic	MYO1C_HUMAN	1.31e-24	15	15	15	15	15	15	15	15	15	15	15	15	15	15	15	15	15	15	15	0	0	0	15	15	15	15	15	15	15	15	15	15	0	15	15	15	15	15	15	15	15	15	15	15	15
O00161	SNAP23	Synaptosomal-associated protein 23	SNP23_HUMAN	1.53e-16	2	2	2	2	0	0	0	0	0	0	2	0	2	2	2	2	2	2	2	0	0	2	0	0	2	2	2	0	2	2	0	2	0	2	2	2	2	2	2	2	2	2	0	0	2
O00182	LGALS9	Galectin-9	LEG9_HUMAN	4.78e-15	5	5	5	5	5	5	0	5	0	5	5	5	5	5	5	5	5	5	5	0	0	5	5	5	5	5	5	5	5	5	5	5	5	5	5	5	5	5	5	5	5	5	5	5	5
O00187	MASP2	Mannan-binding lectin serine protease 2	MASP2_HUMAN	1.78e-16	10	10	10	10	10	10	10	10	10	10	10	10	10	10	10	10	10	10	10	10	10	10	10	10	10	10	10	10	10	10	10	10	10	10	10	10	10	10	10	10	10	10	10	10	10
O00194	RAB27B	Ras-related protein Rab-27B	RB27B_HUMAN	1.32e-08	2	2	2	0	0	0	0	0	0	2	0	2	2	2	2	0	0	0	2	0	0	0	0	0	2	2	2	2	2	2	0	0	0	2	0	0	2	2	0	0	0	0	2	0	0
O00204	SULT2B1	Sulfotransferase family cytosolic 2B member 1	ST2B1_HUMAN	7.51e-11	12	12	12	12	12	0	0	12	0	12	12	12	12	12	12	12	12	12	12	12	12	12	12	12	12	12	12	12	12	12	12	12	12	12	12	12	12	12	12	12	0	12	12	0	12
O00231	PSMD11	26S proteasome non-ATPase regulatory subunit 11	PSD11_HUMAN	1.13e-17	0	5	0	5	0	0	0	0	0	5	5	0	5	5	5	0	0	0	5	0	0	5	5	0	5	0	5	5	5	5	0	5	0	5	5	5	5	5	5	5	0	0	5	0	0
O00232	PSMD12	26S proteasome non-ATPase regulatory subunit 12	PSD12_HUMAN	1.77e-18	0	3	0	0	3	3	0	0	0	3	3	3	3	3	3	0	0	0	3	0	0	3	3	0	3	3	3	3	3	3	0	0	0	3	3	3	3	0	3	0	0	0	3	0	0
O00233	PSMD9	26S proteasome non-ATPase regulatory subunit 9	PSMD9_HUMAN	1.51e-22	4	4	4	4	4	4	0	0	0	4	4	4	4	4	4	4	4	0	4	0	0	4	4	4	4	4	4	4	4	4	4	0	0	4	4	4	4	4	4	4	0	0	4	0	0
O00241	SIRPB1	Signal-regulatory protein beta-1	SIRB1_HUMAN	9.18e-25	10	10	10	10	10	10	10	10	10	10	10	10	10	10	10	10	10	10	10	10	10	10	10	10	10	10	10	10	10	10	10	10	10	10	10	10	10	10	10	10	10	10	10	10	10
O00244	ATOX1	Copper transport protein ATOX1	ATOX1_HUMAN	1.93e-19	4	4	4	4	4	4	4	4	4	4	4	4	4	4	4	4	4	4	4	4	0	4	4	4	4	4	4	4	4	4	4	4	4	4	4	4	4	4	4	4	4	4	4	4	4
O00264	PGRMC1	Membrane-associated progesterone receptor component 1	PGRC1_HUMAN	4.42e-11	2	0	0	0	2	0	2	2	2	2	2	2	2	0	0	2	2	2	2	2	2	2	2	2	2	2	2	2	2	2	0	0	0	2	0	2	2	2	2	2	2	2	2	2	2
O00299	CLIC1	Chloride intracellular channel protein 1	CLIC1_HUMAN	1.56e-20	9	9	9	9	9	9	9	0	0	9	9	9	9	9	9	9	9	9	9	0	0	9	9	9	9	9	9	9	9	9	9	9	0	9	9	9	9	9	9	9	9	9	9	9	9
O00303	EIF3F	Eukaryotic translation initiation factor 3 subunit F	EIF3F_HUMAN	1.21e-05	0	2	0	2	2	0	0	0	0	0	2	2	2	2	2	0	0	0	0	0	0	0	0	0	0	0	2	2	2	2	0	0	0	2	2	2	0	0	0	0	0	0	2	0	0
O00322	UPK1A	Uroplakin-1a	UPK1A_HUMAN	3.99e-20	6	6	6	6	6	6	6	6	6	6	6	6	6	6	6	6	6	6	6	6	0	6	6	6	6	6	6	6	6	6	6	6	6	6	6	6	6	6	6	6	6	6	6	6	6
O00339	MATN2	Matrilin-2	MATN2_HUMAN	4.14e-24	0	0	0	4	0	0	0	0	0	4	4	0	0	4	0	0	0	4	0	4	0	0	0	0	0	0	0	4	0	4	0	0	0	0	0	0	4	4	4	4	4	4	0	4	4
O00391	QSOX1	Sulfhydryl oxidase 1	QSOX1_HUMAN	1.03e-25	40	40	40	40	40	40	40	40	40	40	40	40	40	40	40	40	40	40	40	40	40	40	40	40	40	40	40	40	40	40	40	40	40	40	40	40	40	40	40	40	40	40	40	40	40
O00401	WASL	Neural Wiskott-Aldrich syndrome protein	WASL_HUMAN	2.17e-19	3	3	3	3	3	3	3	3	3	3	3	3	3	3	3	3	3	0	3	0	0	3	3	0	3	3	3	3	3	3	3	3	3	3	3	3	3	3	3	3	3	3	3	3	3
O00410	IPO5	Importin-5	IPO5_HUMAN	1.79e-10	0	0	0	0	0	0	0	0	0	0	0	0	2	2	2	0	2	0	0	0	0	0	0	0	2	0	0	2	2	2	0	0	0	2	2	0	0	0	0	2	2	0	2	0	0
O00429	DNM1L	Dynamin-1-like protein	DNM1L_HUMAN	3.29e-18	2	2	2	2	2	2	0	0	0	2	2	2	2	2	2	2	2	2	2	0	0	2	2	2	2	2	2	2	2	2	2	2	0	2	2	2	2	2	2	0	0	2	2	0	2
O00461	GOLIM4	Golgi integral membrane protein 4	GOLI4_HUMAN	3.42e-12	2	2	2	2	2	2	2	2	0	2	2	2	2	2	2	2	2	2	2	2	2	0	2	2	2	2	2	2	2	2	2	2	2	2	2	2	2	2	2	2	0	0	2	2	2
O00462	MANBA	Beta-mannosidase	MANBA_HUMAN	5.79e-26	26	26	26	26	26	26	26	26	26	26	26	26	26	26	26	26	26	26	26	0	0	26	26	26	26	26	26	26	26	26	26	26	26	26	26	26	26	26	26	26	26	26	26	26	26
O00468	AGRN	Agrin	AGRIN_HUMAN	2.04e-22	38	38	38	38	38	38	38	38	38	38	38	38	38	38	38	38	38	38	38	38	38	38	38	38	38	38	38	38	38	38	38	38	38	38	38	38	38	38	38	38	38	38	38	38	38
O00499	BIN1	Myc box-dependent-interacting protein 1	BIN1_HUMAN	3.28e-20	7	7	7	7	7	7	7	7	7	7	7	7	7	7	7	7	7	7	7	7	7	7	7	7	7	7	7	7	7	7	7	7	7	7	7	7	7	7	7	7	7	7	7	7	7
O00515	LAD1	Ladinin-1	LAD1_HUMAN	5.2e-10	5	5	0	0	0	5	0	0	0	0	5	0	5	5	5	0	5	5	5	0	0	0	0	0	5	5	5	5	5	0	0	0	0	5	0	5	5	5	5	0	0	0	5	0	0
O00526	UPK2	Uroplakin-2	UPK2_HUMAN	9.81e-24	4	4	4	4	4	4	4	4	4	4	4	4	4	4	4	4	4	4	4	4	4	4	4	4	4	4	4	4	4	4	4	4	4	4	4	4	4	4	4	4	4	4	4	4	4
O00533	CHL1	Neural cell adhesion molecule L1-like protein	NCHL1_HUMAN	1.05e-25	28	28	28	28	28	28	28	28	28	28	28	28	28	28	28	28	28	28	28	28	28	28	28	28	28	28	28	28	28	28	28	28	28	28	28	28	28	28	28	28	28	28	28	28	28
O00560	SDCBP	Syntenin-1	SDCB1_HUMAN	2.39e-25	11	11	11	11	11	11	11	11	11	11	11	11	11	11	11	11	11	11	11	11	11	11	11	11	11	11	11	11	11	11	11	11	11	11	11	11	11	11	11	11	11	11	11	11	11
O00571	DDX3X	ATP-dependent RNA helicase DDX3X	DDX3X_HUMAN	3.56e-23	5	5	5	0	0	0	0	0	0	5	0	0	5	5	5	0	0	0	5	0	0	0	5	0	5	5	5	5	5	5	0	0	0	5	5	0	0	0	0	0	0	0	5	0	0
O00584	RNASET2	Ribonuclease T2	RNT2_HUMAN	2.46e-26	17	17	17	17	17	17	17	17	17	17	17	17	17	17	17	17	17	17	17	17	17	17	17	17	17	17	17	17	17	17	17	17	17	17	17	17	17	17	17	17	17	17	17	17	17
O00592	PODXL	Podocalyxin	PODXL_HUMAN	1e-18	10	10	10	10	10	10	10	10	10	10	10	10	10	10	10	10	10	10	10	10	10	10	10	10	10	10	10	10	10	10	10	10	10	10	10	10	10	10	10	10	10	10	10	10	10
O00622	CYR61	Protein CYR61	CYR61_HUMAN	1.74e-17	4	4	4	4	0	4	4	4	4	4	4	4	4	4	4	4	4	4	4	4	4	4	4	4	4	4	4	4	4	4	4	4	4	4	4	4	4	4	4	4	4	4	4	4	4
O00748	CES2	Cocaine esterase	EST2_HUMAN	5.8e-15	0	3	0	0	0	0	0	0	0	3	3	3	3	3	3	0	0	0	3	0	0	0	0	0	3	3	3	3	3	3	0	0	0	3	3	0	3	3	0	0	0	0	3	0	0
O00754	MAN2B1	Lysosomal alpha-mannosidase	MA2B1_HUMAN	2.56e-24	12	12	12	12	12	12	0	0	0	12	12	12	12	12	12	12	12	12	12	0	0	12	12	12	12	12	12	12	12	12	12	12	0	12	12	12	12	12	12	12	12	12	12	12	12
O00764	PDXK	Pyridoxal kinase	PDXK_HUMAN	4.12e-17	4	4	4	4	4	4	0	0	0	4	4	4	4	4	4	4	4	4	4	0	0	4	4	4	4	4	4	4	4	4	0	0	0	4	4	4	4	4	4	4	4	4	4	0	4
O14498	ISLR	Immunoglobulin superfamily containing leucine-rich repeat protein	ISLR_HUMAN	5.98e-29	7	7	7	7	7	7	7	7	7	7	7	7	7	7	7	7	7	7	7	7	7	7	7	7	7	7	7	7	7	7	7	7	7	7	7	7	7	7	7	7	7	7	7	7	7
O14556	GAPDHS	Glyceraldehyde-3-phosphate dehydrogenase, testis-specific	G3PT_HUMAN	6.66e-17	6	6	6	6	6	6	6	6	6	6	6	6	6	6	6	6	6	6	6	6	6	6	6	6	6	6	6	6	6	6	6	6	6	6	6	6	6	6	6	6	6	6	6	6	6
O14561	NDUFAB1	Acyl carrier protein, mitochondrial	ACPM_HUMAN	1.4e-10	2	2	2	2	0	0	0	0	0	2	2	2	2	2	2	0	0	0	2	0	0	2	2	2	2	2	2	2	2	2	0	0	0	2	2	2	0	0	0	0	0	0	2	0	0
O14579	COPE	Coatomer subunit epsilon	COPE_HUMAN	5.86e-06	0	0	0	0	0	2	0	0	0	0	2	0	2	2	2	0	0	0	2	0	0	0	0	0	2	2	2	2	2	2	0	0	0	2	2	2	2	0	0	0	0	0	2	0	0
O14594	NCAN	Neurocan core protein	NCAN_HUMAN	2.3e-16	2	2	2	2	2	2	2	2	2	2	2	2	2	2	2	2	2	2	2	2	2	2	2	2	2	2	2	2	2	2	2	2	2	2	2	2	2	2	2	2	2	2	2	2	2
O14618	CCS	Copper chaperone for superoxide dismutase	CCS_HUMAN	1.69e-22	3	3	0	3	3	3	0	0	0	3	3	3	3	3	3	0	3	3	3	3	0	3	3	3	3	3	3	3	3	3	0	0	0	3	3	3	3	3	3	0	0	0	3	0	0
O14639	ABLIM1	Actin-binding LIM protein 1	ABLM1_HUMAN	8.91e-07	0	0	0	0	0	0	0	0	0	0	0	0	2	2	2	0	0	0	2	0	0	0	0	0	2	2	2	2	2	0	0	0	0	2	0	0	0	0	0	0	0	0	2	0	0
O14732	IMPA2	Inositol monophosphatase 2	IMPA2_HUMAN	3.53e-20	4	4	4	4	4	4	0	4	0	4	4	4	4	4	4	4	4	4	4	0	4	4	4	4	4	4	4	4	4	4	4	4	0	4	4	4	4	4	4	4	4	4	4	4	4
O14737	PDCD5	Programmed cell death protein 5	PDCD5_HUMAN	6.34e-09	4	0	0	0	0	0	0	0	0	4	4	4	4	4	4	0	4	0	4	4	4	4	4	4	4	4	4	4	4	4	0	0	0	4	0	4	4	0	4	4	0	4	4	0	0
O14744	PRMT5	Protein arginine N-methyltransferase 5	ANM5_HUMAN	1.83e-13	3	3	0	3	3	0	0	0	0	3	3	3	3	3	3	0	3	3	3	3	0	0	0	0	3	3	0	3	3	3	0	0	0	3	3	3	3	3	3	3	3	3	3	3	3
O14745	SLC9A3R1	Na(+)/H(+) exchange regulatory cofactor NHE-RF1	NHRF1_HUMAN	1.88e-19	12	12	12	12	12	12	12	12	12	12	12	12	12	12	12	12	12	12	12	12	12	12	12	12	12	12	12	12	12	12	12	12	12	12	12	12	12	12	12	12	12	12	12	12	12
O14773	TPP1	Tripeptidyl-peptidase 1	TPP1_HUMAN	5.67e-25	16	16	16	16	16	16	16	16	0	16	16	16	16	16	16	16	16	16	16	0	16	16	16	16	16	16	16	16	16	16	16	16	16	16	16	16	16	16	16	16	16	16	16	16	16
O14786	NRP1	Neuropilin-1	NRP1_HUMAN	1.05e-25	7	7	7	7	7	7	7	7	7	7	7	7	7	7	7	7	0	7	7	0	7	7	7	7	7	7	7	7	7	7	7	7	7	7	7	7	7	7	7	7	7	7	7	7	7
O14791	APOL1	Apolipoprotein L1	APOL1_HUMAN	9.02e-14	4	4	0	4	0	0	0	0	0	4	0	4	4	4	4	4	0	0	4	4	4	0	0	0	4	4	4	0	0	0	0	4	0	4	4	4	0	4	0	0	0	0	4	0	0
O14798	TNFRSF10C	Tumor necrosis factor receptor superfamily member 10C	TR10C_HUMAN	5.98e-29	4	4	4	4	4	4	4	4	4	4	4	4	4	4	4	4	4	4	4	4	4	4	4	4	4	4	4	4	4	4	4	4	4	4	4	4	4	4	4	4	4	4	4	4	4
O14818	PSMA7	Proteasome subunit alpha type-7	PSA7_HUMAN	3.78e-24	9	9	9	9	9	9	0	0	0	9	9	9	9	9	9	9	9	9	9	9	0	9	9	9	9	9	9	9	9	9	9	9	0	9	9	9	9	9	9	9	9	9	9	9	9
O14907	TAX1BP3	Tax1-binding protein 3	TX1B3_HUMAN	2.63e-13	2	2	2	2	2	2	0	0	0	2	2	2	2	2	2	0	2	0	2	0	0	2	0	2	2	2	2	2	2	2	2	2	0	2	2	2	2	2	2	2	2	2	2	2	2
O14908	GIPC1	PDZ domain-containing protein GIPC1	GIPC1_HUMAN	2.96e-18	3	3	3	3	0	0	0	0	0	3	3	3	3	3	3	3	3	3	3	0	0	0	0	0	3	3	3	3	3	3	0	3	0	3	3	3	0	0	0	0	0	0	0	0	0
O14917	PCDH17	Protocadherin-17	PCD17_HUMAN	1.93e-07	2	2	2	2	0	0	2	2	0	2	2	2	0	0	2	2	2	2	2	2	0	2	2	2	2	2	2	2	2	2	2	2	0	2	0	2	2	2	2	2	0	2	2	2	2
O14950;P19105	MYL12B;MYL12A	Myosin regulatory light chain 12B;Myosin regulatory light chain 12A	ML12B_HUMAN;ML12A_HUMAN	7.02e-20	5	5	5	5	5	5	5	5	5	5	5	5	5	5	5	5	5	5	5	0	5	5	5	5	5	5	5	5	5	5	5	5	0	5	5	5	5	5	5	5	5	5	5	5	5
O14966	RAB29	Ras-related protein Rab-7L1	RAB7L_HUMAN	7.82e-14	3	3	3	3	0	0	0	0	0	3	3	3	3	3	3	0	0	0	3	0	0	0	0	0	3	3	3	3	3	3	3	0	0	3	3	3	3	3	3	0	0	0	3	0	0
O14980	XPO1	Exportin-1	XPO1_HUMAN	1.31e-11	0	0	3	3	0	0	0	0	0	0	0	0	3	3	3	0	3	0	3	0	0	0	3	0	3	3	3	3	0	3	0	3	0	3	3	3	3	3	0	3	0	0	0	0	0
O15020	SPTBN2	Spectrin beta chain, non-erythrocytic 2	SPTN2_HUMAN	1.06e-08	0	4	0	0	0	0	0	0	0	0	4	0	4	4	4	0	0	0	0	0	0	0	0	0	0	4	4	4	4	4	0	0	0	4	4	4	0	4	0	0	0	0	4	0	0
O15031	PLXNB2	Plexin-B2	PLXB2_HUMAN	2.27e-25	11	11	11	11	11	11	11	11	11	11	11	11	11	11	11	11	11	11	11	11	11	11	11	11	11	11	11	11	11	11	11	11	11	11	11	11	11	11	11	11	11	11	11	11	11
O15143	ARPC1B	Actin-related protein 2/3 complex subunit 1B	ARC1B_HUMAN	2.47e-14	6	6	6	6	6	6	0	6	0	6	6	6	6	6	6	6	6	6	6	0	0	6	6	6	6	6	6	6	6	6	0	6	0	6	6	6	6	6	6	0	0	6	6	0	0
O15144	ARPC2	Actin-related protein 2/3 complex subunit 2	ARPC2_HUMAN	1.5e-21	11	11	11	11	11	11	11	0	0	11	11	11	11	11	11	11	11	11	11	0	0	11	11	11	11	11	11	11	11	11	11	11	0	11	11	11	11	11	11	11	11	11	11	11	11
O15145	ARPC3	Actin-related protein 2/3 complex subunit 3	ARPC3_HUMAN	9.56e-27	6	6	6	6	6	6	6	6	6	6	6	6	6	6	6	6	6	6	6	6	6	6	6	6	6	6	6	6	6	6	6	6	6	6	6	6	6	6	6	6	6	6	6	6	6
O15162	PLSCR1	Phospholipid scramblase 1	PLS1_HUMAN	5.77e-16	5	5	5	5	5	5	5	5	5	5	5	5	5	5	5	5	5	5	5	0	0	5	5	5	5	5	5	5	5	5	5	5	5	5	5	5	5	5	5	5	5	5	5	5	5
O15173	PGRMC2	Membrane-associated progesterone receptor component 2	PGRC2_HUMAN	4.5e-14	3	3	3	3	3	0	3	0	3	3	3	3	3	3	3	3	3	3	3	3	3	3	3	3	3	3	3	3	3	3	3	3	0	3	3	3	3	3	3	3	0	0	3	3	0
O15197	EPHB6	Ephrin type-B receptor 6	EPHB6_HUMAN	6.24e-25	11	11	11	11	11	11	11	11	11	11	11	11	11	11	11	11	11	11	11	11	0	11	11	11	11	11	11	11	11	11	11	11	11	11	11	11	11	11	11	11	11	11	11	11	11
O15204	ADAMDEC1	ADAM DEC1	ADEC1_HUMAN	6.82e-21	2	2	2	0	0	0	2	2	2	0	0	0	2	0	2	2	2	2	2	2	2	2	2	2	2	2	2	2	2	2	2	2	2	2	2	2	2	0	2	2	2	2	2	2	2
O15217	GSTA4	Glutathione S-transferase A4	GSTA4_HUMAN	6.55e-05	0	0	0	0	0	0	0	0	0	2	2	2	2	2	0	0	0	0	2	0	0	2	0	0	2	2	2	2	2	2	0	2	0	2	0	2	2	2	2	0	0	0	0	0	0
O15230	LAMA5	Laminin subunit alpha-5	LAMA5_HUMAN	5.98e-29	14	14	14	14	14	14	14	14	14	14	14	14	14	14	14	14	14	14	14	14	14	14	14	14	14	14	14	14	14	14	14	14	14	14	14	14	14	14	14	14	14	14	14	14	14
O15231	ZNF185	Zinc finger protein 185	ZN185_HUMAN	5.98e-29	24	24	24	24	24	24	24	24	24	24	24	24	24	24	24	24	24	24	24	24	24	24	24	24	24	24	24	24	24	24	24	24	24	24	24	24	0	24	24	24	24	24	24	24	0
O15240	VGF	Neurosecretory protein VGF	VGF_HUMAN	9.98e-16	9	9	0	9	9	9	9	9	9	9	0	9	9	9	9	9	9	9	9	9	9	9	9	9	9	9	9	9	9	9	9	9	9	9	9	9	9	9	9	9	9	9	9	9	9
O15244	SLC22A2	Solute carrier family 22 member 2	S22A2_HUMAN	1.84e-12	2	0	0	2	0	0	0	0	0	2	2	2	2	2	2	2	2	2	2	2	0	2	2	2	2	2	2	0	2	0	2	2	0	2	2	2	2	2	2	2	0	0	2	0	0
O15254	ACOX3	Peroxisomal acyl-coenzyme A oxidase 3	ACOX3_HUMAN	2.62e-10	0	0	2	0	0	0	0	0	0	0	0	0	2	2	2	0	0	0	2	0	0	0	0	0	0	0	0	2	2	2	2	0	0	2	0	2	0	0	0	2	0	0	0	0	0
O15263	DEFB4A	Beta-defensin 4A	DFB4A_HUMAN	2.74e-15	0	0	0	0	0	0	0	0	0	2	0	2	2	2	2	2	2	0	2	0	0	0	0	0	2	2	2	2	2	2	0	0	0	2	0	2	0	0	0	0	0	0	2	0	0
O15273	TCAP	Telethonin	TELT_HUMAN	4.09e-12	0	2	0	2	2	2	2	2	2	0	2	2	0	0	0	0	0	0	2	2	2	2	2	2	2	2	2	2	2	2	2	2	0	2	2	0	2	2	2	2	2	2	0	2	2
O15296	ALOX15B	Arachidonate 15-lipoxygenase B	LX15B_HUMAN	3.04e-10	0	0	0	0	0	0	0	0	0	0	0	0	2	2	2	0	0	0	2	0	0	0	0	0	0	0	0	2	2	2	0	0	0	0	0	0	0	0	0	0	0	0	2	0	0
O15382	BCAT2	Branched-chain-amino-acid aminotransferase, mitochondrial	BCAT2_HUMAN	8.93e-17	5	5	0	0	5	5	0	5	0	5	5	5	5	5	5	0	0	0	5	0	0	5	5	5	5	5	5	5	5	5	5	0	0	5	5	5	0	5	0	5	5	0	5	0	0
O15393	TMPRSS2	Transmembrane protease serine 2	TMPS2_HUMAN	9.82e-18	4	4	4	4	4	4	4	4	4	4	4	4	4	4	4	4	4	4	4	4	0	4	4	4	4	4	4	4	4	4	4	4	0	4	4	4	4	4	4	4	4	4	4	4	4
O15394	NCAM2	Neural cell adhesion molecule 2	NCAM2_HUMAN	7.03e-16	5	5	5	5	0	5	5	0	0	5	5	5	5	5	5	5	5	5	5	0	0	5	5	5	5	5	5	5	5	5	5	5	0	5	5	5	5	5	5	5	5	5	5	5	5
O15400	STX7	Syntaxin-7	STX7_HUMAN	2.02e-16	3	3	0	3	3	3	0	3	0	3	3	3	3	3	3	3	3	3	3	0	0	3	3	0	3	3	3	3	3	3	0	0	0	3	3	3	3	3	3	0	0	0	3	0	0
O15484	CAPN5	Calpain-5	CAN5_HUMAN	8.87e-19	4	4	4	4	4	4	0	0	0	4	4	4	4	4	4	4	4	4	4	0	0	0	4	0	4	4	4	4	4	4	4	0	0	4	4	4	4	4	4	4	4	4	4	4	4
O15498	YKT6	Synaptobrevin homolog YKT6	YKT6_HUMAN	2.03e-08	2	0	2	2	2	2	0	0	0	0	2	2	2	2	2	0	0	0	2	0	0	0	0	0	2	2	2	2	2	2	0	0	0	2	2	2	2	2	2	2	0	0	2	0	0
O15511	ARPC5	Actin-related protein 2/3 complex subunit 5	ARPC5_HUMAN	1.77e-16	4	4	4	4	4	4	4	4	0	4	4	4	4	4	4	4	4	4	4	0	0	4	4	4	4	4	4	4	4	4	4	4	4	4	4	4	4	4	4	4	4	4	4	4	4
O43143	DHX15	Pre-mRNA-splicing factor ATP-dependent RNA helicase DHX15	DHX15_HUMAN	3.71e-10	2	0	0	0	0	0	0	0	0	0	0	0	2	2	2	0	0	0	0	0	0	0	0	0	0	0	0	2	2	2	0	0	0	0	0	0	2	0	0	0	0	0	0	0	0
O43155	FLRT2	Leucine-rich repeat transmembrane protein FLRT2	FLRT2_HUMAN	2.81e-21	15	15	15	15	15	15	0	0	15	15	15	15	15	15	15	15	15	15	15	15	15	15	15	15	15	15	15	15	15	15	15	15	0	15	15	15	15	15	15	15	15	15	15	15	15
O43157	PLXNB1	Plexin-B1	PLXB1_HUMAN	1.57e-15	5	5	5	5	5	5	5	5	5	5	5	5	5	5	5	5	5	0	5	5	5	5	5	0	5	5	5	5	5	5	5	5	0	5	5	5	5	5	5	5	5	5	5	5	5
O43175	PHGDH	D-3-phosphoglycerate dehydrogenase	SERA_HUMAN	9.83e-23	13	13	13	13	13	13	0	0	0	13	13	13	13	13	13	13	13	13	13	0	0	13	13	13	13	13	13	13	13	13	13	13	0	13	13	13	13	13	13	13	13	13	13	13	13
O43240	KLK10	Kallikrein-10	KLK10_HUMAN	7.7e-27	12	12	12	12	12	12	0	0	0	12	12	12	12	12	12	12	12	12	12	12	0	12	12	12	12	12	12	12	12	12	12	12	12	12	12	12	12	12	12	0	0	12	12	0	0
O43242	PSMD3	26S proteasome non-ATPase regulatory subunit 3	PSMD3_HUMAN	4.11e-15	0	0	5	5	5	5	0	0	0	5	5	0	5	5	5	0	0	0	0	5	5	0	5	5	5	5	5	5	5	5	5	5	0	5	5	5	5	5	5	5	5	5	5	0	0
O43278	SPINT1	Kunitz-type protease inhibitor 1	SPIT1_HUMAN	4.53e-25	23	23	23	23	23	23	23	23	23	23	23	23	23	23	23	23	23	23	23	23	23	23	23	23	23	23	23	23	23	23	23	23	23	23	23	23	23	23	23	23	23	23	23	23	23
O43291	SPINT2	Kunitz-type protease inhibitor 2	SPIT2_HUMAN	5.59e-13	3	3	3	3	3	3	3	3	3	3	3	3	3	3	3	3	3	3	3	3	3	3	3	3	3	3	3	3	3	3	3	3	3	3	3	3	3	3	3	3	3	3	3	3	3
O43324	EEF1E1	Eukaryotic translation elongation factor 1 epsilon-1	MCA3_HUMAN	7.64e-14	2	0	0	2	2	2	0	0	0	2	2	2	2	0	2	0	0	0	2	0	0	2	2	0	2	0	2	2	2	2	0	2	0	2	2	2	2	2	2	0	2	0	2	0	0
O43396	TXNL1	Thioredoxin-like protein 1	TXNL1_HUMAN	1.22e-24	6	6	6	6	6	6	6	0	6	6	6	6	6	6	6	6	6	6	6	0	0	6	6	6	6	6	6	6	6	6	6	6	0	6	6	6	6	6	6	6	6	6	6	6	6
O43399	TPD52L2	Tumor protein D54	TPD54_HUMAN	5.36e-20	4	4	4	4	4	4	0	0	0	4	4	4	4	4	4	4	4	4	4	4	4	4	4	4	4	4	4	4	4	4	4	4	4	4	4	4	4	4	4	4	4	4	4	4	4
O43405	COCH	Cochlin	COCH_HUMAN	1.05e-14	3	3	3	3	3	3	3	3	3	3	3	3	3	3	3	3	3	3	3	3	3	3	3	3	3	3	3	3	3	3	3	3	3	3	3	3	3	3	3	3	3	3	3	3	3
O43451	MGAM	Maltase-glucoamylase, intestinal	MGA_HUMAN	2.49e-26	53	53	53	53	53	53	53	53	53	53	53	53	53	53	53	53	53	53	53	53	53	53	53	53	53	53	53	53	53	53	53	53	53	53	53	53	53	53	53	53	53	53	53	53	53
O43488	AKR7A2	Aflatoxin B1 aldehyde reductase member 2	ARK72_HUMAN	6.07e-20	3	0	3	3	3	3	0	0	0	3	3	3	3	3	3	0	3	0	3	0	0	3	3	3	3	3	3	3	3	3	3	0	0	3	3	3	3	3	3	0	0	0	3	0	0
O43490	PROM1	Prominin-1	PROM1_HUMAN	2.75e-24	20	20	20	20	20	20	20	20	20	20	20	20	20	20	20	20	20	20	20	20	0	20	20	20	20	20	20	20	20	20	20	20	0	20	20	20	20	20	20	20	20	20	20	20	20
O43491	EPB41L2	Band 4.1-like protein 2	E41L2_HUMAN	6.67e-26	0	0	2	2	0	2	2	2	2	2	2	2	0	0	0	0	0	0	2	2	2	2	2	2	2	2	2	0	0	0	2	2	2	2	2	2	2	0	2	2	2	2	2	2	2
O43493	TGOLN2	Trans-Golgi network integral membrane protein 2	TGON2_HUMAN	4.2e-22	9	9	9	9	9	9	9	9	9	9	9	9	9	9	9	9	9	9	9	9	9	9	9	9	9	9	9	9	9	9	9	9	9	9	9	9	9	9	9	9	9	9	9	9	9
O43505	B4GAT1	Beta-1,4-glucuronyltransferase 1	B4GA1_HUMAN	2.72e-24	12	12	12	12	12	12	12	12	12	12	12	12	12	12	12	12	12	12	12	12	12	12	12	12	12	12	12	12	12	12	12	12	12	12	12	12	12	12	12	12	12	12	12	12	12
O43511	SLC26A4	Pendrin	S26A4_HUMAN	6.16e-15	4	4	4	0	0	0	0	0	0	4	4	4	4	4	4	4	4	4	4	0	0	0	0	0	4	4	4	4	4	4	4	4	4	4	4	4	4	4	4	4	4	4	4	4	4
O43567	RNF13	E3 ubiquitin-protein ligase RNF13	RNF13_HUMAN	5.03e-17	4	4	4	4	4	4	4	4	4	4	4	4	4	4	4	4	4	4	4	4	4	4	4	4	4	4	4	4	4	4	4	4	4	4	4	4	4	4	4	4	4	4	4	4	4
O43570	CA12	Carbonic anhydrase 12	CAH12_HUMAN	1.05e-25	5	5	5	5	5	5	5	0	0	5	5	5	5	5	5	5	5	5	5	0	0	5	5	5	5	5	5	5	5	5	5	5	0	5	5	5	5	5	5	5	5	5	5	0	5
O43586	PSTPIP1	Proline-serine-threonine phosphatase-interacting protein 1	PPIP1_HUMAN	3.5e-19	2	0	0	2	2	2	2	2	2	0	0	0	2	2	2	2	2	2	2	2	2	2	2	2	2	2	2	2	2	2	2	2	2	2	2	2	2	2	2	2	2	2	2	2	2
O43598	DNPH1	2'-deoxynucleoside 5'-phosphate N-hydrolase 1	DNPH1_HUMAN	1.38e-24	4	4	4	4	4	4	0	4	0	4	4	4	4	4	4	0	4	0	4	4	4	4	4	4	4	4	4	4	4	4	4	4	0	4	4	4	4	4	4	4	4	4	4	4	4
O43617	TRAPPC3	Trafficking protein particle complex subunit 3	TPPC3_HUMAN	2.27e-09	3	0	0	0	0	0	0	0	0	0	0	0	3	3	3	0	3	0	3	0	0	0	3	0	3	0	3	3	3	3	3	0	0	0	0	3	3	0	0	0	0	0	3	0	0
O43633	CHMP2A	Charged multivesicular body protein 2a	CHM2A_HUMAN	3.69e-20	8	8	8	8	8	8	8	8	8	8	8	8	8	8	8	8	8	8	8	8	8	8	8	8	8	8	8	8	8	8	8	8	8	8	8	8	8	8	8	8	8	8	8	8	8
O43653	PSCA	Prostate stem cell antigen	PSCA_HUMAN	1.42e-21	3	3	3	3	3	3	3	3	3	3	3	3	3	3	3	3	3	3	3	3	3	3	3	3	3	3	3	3	3	3	3	3	0	3	3	3	3	3	3	3	3	3	3	3	3
O43681	ASNA1	ATPase ASNA1	ASNA_HUMAN	5.25e-11	2	2	2	2	2	2	0	0	0	2	2	2	2	2	2	2	2	0	2	0	0	2	2	2	2	2	2	2	2	2	2	2	0	2	2	2	2	2	2	2	2	0	2	2	0
O43707	ACTN4	Alpha-actinin-4	ACTN4_HUMAN	5.98e-29	41	41	41	41	41	41	41	41	41	41	41	41	41	41	41	41	41	41	41	0	0	41	41	41	41	41	41	41	41	41	41	41	0	41	41	41	41	41	41	41	41	41	41	41	41
O43747	AP1G1	AP-1 complex subunit gamma-1	AP1G1_HUMAN	2.14e-15	0	5	5	5	0	5	0	0	0	0	0	0	5	5	5	0	0	0	5	0	0	0	0	0	5	5	5	5	5	5	5	0	0	5	5	5	5	5	5	0	0	0	5	0	0
O43768	ENSA	Alpha-endosulfine	ENSA_HUMAN	2.04e-14	6	6	6	6	6	6	0	6	6	6	0	6	6	6	6	6	6	6	6	6	6	6	6	6	6	6	6	6	6	6	6	6	6	6	6	6	6	6	6	6	6	6	6	6	6
O43776	NARS	Asparagine--tRNA ligase, cytoplasmic	SYNC_HUMAN	6.92e-09	4	0	4	0	0	0	0	0	0	4	4	4	4	4	4	4	4	0	4	0	0	0	0	0	4	4	0	4	4	4	4	0	0	4	4	4	4	4	4	0	0	0	4	0	0
O43790;Q14533	KRT86;KRT81	Keratin, type II cuticular Hb6;Keratin, type II cuticular Hb1	KRT86_HUMAN;KRT81_HUMAN	1.2e-21	13	13	13	13	13	13	13	13	13	13	13	13	13	13	13	13	13	13	13	13	13	13	13	13	13	13	13	13	13	13	13	13	13	13	13	13	13	13	13	13	13	13	13	13	13
O43852	CALU	Calumenin	CALU_HUMAN	3.47e-23	9	9	9	9	9	9	9	9	9	9	9	9	9	9	9	9	9	9	9	9	9	9	9	9	9	9	9	9	9	9	9	9	0	9	9	9	9	9	9	9	9	9	9	9	9
O43866	CD5L	CD5 antigen-like	CD5L_HUMAN	4.39e-25	14	14	14	14	14	14	14	14	14	14	14	14	14	14	14	14	14	14	14	14	14	14	14	14	14	14	14	14	14	14	14	14	14	14	14	14	14	14	14	14	14	14	14	14	14
O43895	XPNPEP2	Xaa-Pro aminopeptidase 2	XPP2_HUMAN	3.98e-25	17	17	17	17	17	17	17	0	17	17	17	17	17	17	17	17	17	17	17	17	17	17	17	17	17	17	17	17	17	17	17	17	17	17	17	17	17	17	17	17	17	17	17	17	17
O60218	AKR1B10	Aldo-keto reductase family 1 member B10	AK1BA_HUMAN	3.19e-23	17	17	17	17	17	17	17	17	17	17	17	17	17	17	17	17	17	17	17	17	17	17	17	17	17	17	17	17	17	17	17	17	17	17	17	17	17	17	17	17	17	17	17	17	17
O60234	GMFG	Glia maturation factor gamma	GMFG_HUMAN	3.05e-12	3	3	3	3	3	3	0	0	0	3	3	3	3	0	3	3	0	0	3	0	0	3	3	3	3	3	3	3	3	3	0	0	0	3	3	3	3	3	3	0	0	0	3	0	0
O60235	TMPRSS11D	Transmembrane protease serine 11D	TM11D_HUMAN	6.16e-15	6	6	6	6	6	0	0	6	0	6	6	6	6	6	6	6	6	6	6	0	0	6	6	6	6	6	6	6	6	6	6	6	0	6	6	6	6	0	6	6	6	0	6	0	0
O60259	KLK8	Kallikrein-8	KLK8_HUMAN	5.09e-10	0	0	0	4	0	0	0	4	4	4	4	4	4	0	4	0	4	0	4	0	0	4	4	4	4	4	4	4	4	4	0	0	0	4	4	4	4	0	4	0	0	0	0	0	0
O60271	SPAG9	C-Jun-amino-terminal kinase-interacting protein 4	JIP4_HUMAN	4.03e-18	0	4	4	4	4	4	0	0	0	4	4	4	4	4	4	0	0	0	4	0	0	0	4	4	4	4	4	4	4	4	0	0	0	4	4	4	4	4	4	0	0	0	4	0	0
O60279	SUSD5	Sushi domain-containing protein 5	SUSD5_HUMAN	5.98e-29	8	8	8	8	8	8	8	8	8	8	8	8	8	8	8	8	8	8	8	8	8	8	8	8	8	8	8	8	8	8	8	8	8	8	8	8	8	8	8	8	8	8	8	8	8
O60437	PPL	Periplakin	PEPL_HUMAN	5.47e-28	117	117	117	117	117	117	117	117	117	117	117	117	117	117	117	117	117	117	117	117	117	117	117	117	117	117	117	117	117	117	117	117	117	117	117	117	117	117	117	117	117	117	117	117	117
O60449	LY75	Lymphocyte antigen 75	LY75_HUMAN	1.46e-07	2	2	2	2	2	2	0	0	0	2	2	2	2	2	2	0	2	2	2	0	0	2	0	2	2	2	2	2	2	2	2	2	0	2	2	2	2	0	0	2	0	0	2	0	0
O60487	MPZL2	Myelin protein zero-like protein 2	MPZL2_HUMAN	6.09e-11	0	2	2	2	0	2	2	2	2	2	2	2	2	0	2	0	2	0	2	2	2	2	2	2	2	2	2	2	2	2	2	2	0	2	2	2	2	2	2	2	0	2	2	2	2
O60493	SNX3	Sorting nexin-3	SNX3_HUMAN	9.32e-07	0	0	0	3	3	3	0	0	0	3	3	3	3	3	3	3	3	0	3	0	0	0	0	3	3	3	3	3	3	3	0	3	0	3	3	0	0	3	3	0	0	0	3	3	0
O60494	CUBN	Cubilin	CUBN_HUMAN	4.42e-27	91	91	91	91	91	91	91	91	91	91	91	91	91	91	91	91	91	91	91	91	91	91	91	91	91	91	91	91	91	91	91	91	91	91	91	91	91	91	91	91	91	91	91	91	91
O60506	SYNCRIP	Heterogeneous nuclear ribonucleoprotein Q	HNRPQ_HUMAN	8.8e-10	9	9	9	9	0	9	9	9	0	9	9	9	9	9	9	9	0	9	9	0	0	9	9	9	9	9	9	9	9	9	9	9	0	9	9	9	9	9	9	9	0	0	9	0	9
O60568	PLOD3	Multifunctional procollagen lysine hydroxylase and glycosyltransferase LH3	PLOD3_HUMAN	2.99e-12	4	4	4	4	4	4	0	0	0	4	4	4	4	4	4	4	4	4	4	0	0	4	4	4	4	4	4	4	4	4	4	0	0	4	4	4	4	4	4	4	4	4	4	4	4
O60603	TLR2	Toll-like receptor 2	TLR2_HUMAN	4e-07	0	0	0	2	2	2	2	2	0	2	2	2	0	0	2	0	2	0	2	2	2	2	2	2	2	2	2	2	2	2	2	0	0	2	2	2	0	0	0	2	2	2	2	2	2
O60613	SELENOF	Selenoprotein F	SEP15_HUMAN	4.8e-09	3	0	0	3	3	3	0	0	0	3	3	3	3	3	3	0	0	0	3	0	0	3	3	3	3	3	3	3	3	3	0	0	0	3	3	3	3	3	0	0	0	0	3	0	0
O60635	TSPAN1	Tetraspanin-1	TSN1_HUMAN	1.26e-24	3	3	3	3	3	3	3	3	3	3	3	3	3	3	3	3	3	3	3	3	3	3	3	3	3	3	3	3	3	3	3	3	3	3	3	3	3	3	3	3	3	3	3	3	3
O60664	PLIN3	Perilipin-3	PLIN3_HUMAN	4.34e-19	6	6	6	6	6	6	0	0	0	6	6	6	6	6	6	6	6	6	6	0	0	6	6	0	6	6	6	6	6	6	0	0	0	6	6	6	0	0	6	0	6	0	6	0	0
O60701	UGDH	UDP-glucose 6-dehydrogenase	UGDH_HUMAN	1.28e-11	0	11	11	11	11	11	0	0	0	11	11	11	11	11	11	11	11	11	11	0	0	11	11	11	11	11	11	11	11	11	11	11	0	11	11	11	11	11	11	11	0	11	11	0	0
O60704	TPST2	Protein-tyrosine sulfotransferase 2	TPST2_HUMAN	1.71e-19	5	5	5	5	5	5	5	5	5	5	5	5	5	5	5	5	5	5	5	5	5	5	5	5	5	5	5	5	5	5	5	5	0	5	5	5	5	5	5	5	5	5	5	5	5
O60716	CTNND1	Catenin delta-1	CTND1_HUMAN	3.61e-15	0	0	0	7	0	7	0	0	0	0	0	0	7	7	7	0	7	0	0	0	0	0	0	0	7	7	7	7	7	7	0	0	0	7	0	0	7	7	0	0	0	0	7	0	0
O60763	USO1	General vesicular transport factor p115	USO1_HUMAN	9.4e-20	0	0	0	0	0	2	0	0	0	2	2	0	2	2	2	0	0	0	2	0	0	0	0	0	2	2	2	2	2	2	0	0	0	2	2	2	2	2	0	2	2	2	2	0	2
O60784	TOM1	Target of Myb protein 1	TOM1_HUMAN	1.1e-09	2	0	0	0	2	0	0	0	0	0	0	0	2	2	2	0	2	0	2	0	0	2	0	0	2	2	2	2	2	2	0	0	0	2	2	0	0	0	2	2	0	0	2	0	0
O60814;P57053;P58876;P62807;Q5QNW6;Q93079;Q99877;Q99879;Q99880	HIST1H2BK;H2BFS;HIST1H2BD;HIST1H2BC;HIST2H2BF;HIST1H2BH;HIST1H2BN;HIST1H2BM;HIST1H2BL	Histone H2B type 1-K;Histone H2B type F-S;Histone H2B type 1-D;Histone H2B type 1-C/E/F/G/I;Histone H2B type 2-F;Histone H2B type 1-H;Histone H2B type 1-N;Histone H2B type 1-M;Histone H2B type 1-L	H2B1K_HUMAN;H2BFS_HUMAN;H2B1D_HUMAN;H2B1C_HUMAN;H2B2F_HUMAN;H2B1H_HUMAN;H2B1N_HUMAN;H2B1M_HUMAN;H2B1L_HUMAN	5.44e-23	2	2	2	2	2	2	2	2	2	2	2	2	2	2	2	2	2	2	2	2	2	2	2	2	2	2	2	2	2	2	2	2	0	2	2	2	2	2	2	0	0	2	2	0	0
O60869	EDF1	Endothelial differentiation-related factor 1	EDF1_HUMAN	7.85e-20	0	0	0	2	0	0	0	0	0	2	0	2	2	2	2	0	2	0	2	0	0	0	0	2	2	2	2	0	0	2	0	0	0	0	0	0	0	0	2	2	0	2	2	0	2
O60888	CUTA	Protein CutA	CUTA_HUMAN	9.15e-24	5	5	5	5	5	5	5	5	5	5	5	5	5	5	5	5	5	5	5	5	5	5	5	5	5	5	5	5	5	5	5	5	5	5	5	5	5	5	5	5	5	5	5	5	5
O60911	CTSV	Cathepsin L2	CATL2_HUMAN	3.4e-20	0	6	0	6	0	0	6	0	0	6	6	6	6	6	6	6	6	6	6	0	0	6	6	6	6	6	6	6	6	6	6	6	0	6	6	6	6	6	0	0	0	0	6	0	0
O60925	PFDN1	Prefoldin subunit 1	PFD1_HUMAN	8.51e-21	2	0	2	2	2	2	0	0	0	2	2	2	2	2	2	0	2	0	2	0	0	2	2	2	2	2	2	2	2	2	0	0	0	2	2	2	2	2	2	0	0	0	2	0	0
O60939	SCN2B	Sodium channel subunit beta-2	SCN2B_HUMAN	1.25e-14	2	2	2	2	2	2	2	2	2	2	2	2	2	2	2	0	0	2	2	2	2	2	2	2	2	2	2	2	2	2	0	2	0	2	2	2	2	0	2	2	2	2	2	2	0
O75015	FCGR3B	Low affinity immunoglobulin gamma Fc region receptor III-B	FCG3B_HUMAN	6.86e-18	4	4	4	4	4	4	4	4	4	4	4	4	4	4	4	4	0	4	4	0	0	4	4	4	4	4	4	4	4	4	4	4	4	4	4	4	4	4	4	4	4	4	4	4	4
O75071	EFCAB14	EF-hand calcium-binding domain-containing protein 14	EFC14_HUMAN	3.59e-18	7	7	7	7	7	7	7	7	7	7	7	7	7	7	7	7	7	7	7	7	7	7	7	7	7	7	7	7	7	7	7	7	7	7	7	7	7	7	7	7	7	7	7	7	7
O75074	LRP3	Low-density lipoprotein receptor-related protein 3	LRP3_HUMAN	7.34e-22	4	4	4	4	4	4	4	4	4	4	4	4	4	4	4	4	4	4	4	4	4	4	4	4	4	4	4	4	4	4	4	4	4	4	4	4	4	4	4	4	4	4	4	4	4
O75083	WDR1	WD repeat-containing protein 1	WDR1_HUMAN	1.53e-23	11	11	11	11	11	11	0	0	0	11	11	11	11	11	11	11	11	11	11	0	0	11	11	11	11	11	11	11	11	11	11	11	11	11	11	11	11	11	11	11	11	11	11	11	11
O75084;Q14332	FZD7;FZD2	Frizzled-7;Frizzled-2	FZD7_HUMAN;FZD2_HUMAN	3.17e-10	2	2	2	2	2	2	2	2	2	2	2	2	2	2	2	2	2	2	2	2	2	2	2	2	2	2	2	2	2	2	2	2	2	2	2	2	2	2	2	2	2	2	2	2	2
O75094	SLIT3	Slit homolog 3 protein	SLIT3_HUMAN	2.46e-16	3	3	3	3	3	3	3	3	3	3	3	3	3	3	3	3	3	3	3	3	3	3	3	3	3	3	3	3	3	3	3	3	3	3	3	3	3	3	3	3	3	3	3	3	3
O75095	MEGF6	Multiple epidermal growth factor-like domains protein 6	MEGF6_HUMAN	2.67e-06	4	4	4	4	4	4	4	4	4	4	4	4	4	4	4	4	4	4	4	4	4	4	4	4	4	4	4	4	4	4	4	4	4	4	4	4	4	4	4	4	4	4	4	4	4
O75131	CPNE3	Copine-3	CPNE3_HUMAN	3.3e-23	15	15	15	15	15	15	15	15	15	15	15	15	15	15	15	15	15	15	15	15	0	15	15	15	15	15	15	15	15	15	15	15	0	15	15	15	15	15	15	15	15	15	15	15	15
O75144	ICOSLG	ICOS ligand	ICOSL_HUMAN	1.73e-23	5	5	5	5	5	5	5	5	5	5	5	5	5	5	5	5	5	5	5	5	5	5	5	5	5	5	5	5	5	5	5	5	5	5	5	5	5	5	5	5	5	5	5	5	5
O75223	GGCT	Gamma-glutamylcyclotransferase	GGCT_HUMAN	1.28e-18	11	11	11	11	11	11	11	11	11	11	11	11	11	11	11	11	11	11	11	11	11	11	11	11	11	11	11	11	11	11	11	11	11	11	11	11	11	11	11	11	11	11	11	11	11
O75264	SMIM24	Small integral membrane protein 24	SIM24_HUMAN	2.2e-08	2	2	0	2	2	2	2	2	0	2	2	2	2	0	2	2	2	2	2	2	2	2	2	2	2	2	2	2	2	2	0	2	0	0	2	2	2	2	2	0	0	0	2	0	0
O75309	CDH16	Cadherin-16	CAD16_HUMAN	4.68e-28	20	20	20	20	20	20	20	20	20	20	20	20	20	20	20	20	20	20	20	0	0	20	20	20	20	20	20	20	20	20	20	20	20	20	20	20	20	20	20	20	20	20	20	20	20
O75339	CILP	Cartilage intermediate layer protein 1	CILP1_HUMAN	9.01e-24	22	22	22	22	22	22	22	22	22	22	22	22	22	22	22	22	22	22	22	22	22	22	22	22	22	22	22	22	22	22	22	22	22	22	22	22	22	22	22	22	22	22	22	22	22
O75340	PDCD6	Programmed cell death protein 6	PDCD6_HUMAN	1.45e-22	8	8	8	8	8	8	8	8	8	8	8	8	8	8	8	8	8	8	8	0	0	8	8	8	8	8	8	8	8	8	8	8	0	8	8	8	8	8	8	8	8	8	8	8	8
O75342	ALOX12B	Arachidonate 12-lipoxygenase, 12R-type	LX12B_HUMAN	9.28e-13	5	0	5	0	0	5	5	5	0	5	0	0	5	5	5	5	5	5	5	0	0	5	0	0	5	0	0	5	5	5	5	5	0	5	0	5	5	0	5	0	0	0	5	0	0
O75347	TBCA	Tubulin-specific chaperone A	TBCA_HUMAN	5.29e-18	7	7	7	7	7	7	7	7	7	7	7	7	7	7	7	7	7	7	7	7	7	7	7	7	7	7	7	7	7	7	7	7	0	7	7	7	7	7	7	7	7	7	7	7	7
O75348	ATP6V1G1	V-type proton ATPase subunit G 1	VATG1_HUMAN	7.06e-21	4	4	4	4	4	4	4	4	4	4	4	4	4	4	4	4	4	4	4	4	4	4	4	4	4	4	4	4	4	4	4	0	0	4	4	4	4	4	4	4	4	4	4	4	4
O75351	VPS4B	Vacuolar protein sorting-associated protein 4B	VPS4B_HUMAN	3.95e-24	15	15	15	15	15	15	15	15	15	15	15	15	15	15	15	15	15	15	15	15	15	15	15	15	15	15	15	15	15	15	15	15	15	15	15	15	15	15	15	15	15	15	15	15	15
O75363	BCAS1	Breast carcinoma-amplified sequence 1	BCAS1_HUMAN	1.15e-10	2	2	2	2	2	2	2	2	2	2	2	2	2	2	2	2	2	0	2	2	2	2	2	2	2	2	2	2	2	2	2	2	0	2	2	2	2	2	2	2	0	2	2	0	2
O75367	H2AFY	Core histone macro-H2A.1	H2AY_HUMAN	2.7e-26	7	7	7	7	7	7	0	0	0	7	7	7	7	7	7	7	7	7	7	7	0	7	7	7	7	7	7	7	7	7	7	7	0	7	7	7	7	7	7	7	7	7	7	7	7
O75368	SH3BGRL	SH3 domain-binding glutamic acid-rich-like protein	SH3L1_HUMAN	4.63e-23	5	5	5	5	5	5	5	5	5	5	5	5	5	5	5	5	5	5	5	5	5	5	5	5	5	5	5	5	5	5	5	5	5	5	5	5	5	5	5	5	5	5	5	5	5
O75369	FLNB	Filamin-B	FLNB_HUMAN	6.58e-24	59	59	59	59	59	59	59	59	59	59	59	59	59	59	59	59	59	59	59	59	59	59	59	59	59	59	59	59	59	59	59	59	59	59	59	59	59	59	59	59	59	59	59	59	59
O75390	CS	Citrate synthase, mitochondrial	CISY_HUMAN	3.17e-16	6	6	6	6	6	6	0	0	0	6	6	6	6	6	6	6	6	0	6	0	0	0	6	6	6	6	6	6	6	6	0	0	0	6	6	6	6	6	6	6	6	6	6	6	6
O75396	SEC22B	Vesicle-trafficking protein SEC22b	SC22B_HUMAN	1.05e-13	0	0	0	0	2	0	0	0	0	0	0	0	2	2	2	0	0	0	0	0	0	0	0	0	0	2	2	2	2	2	2	0	0	2	2	0	0	0	0	0	0	0	2	0	0
O75436	VPS26A	Vacuolar protein sorting-associated protein 26A	VP26A_HUMAN	4.45e-08	0	0	0	0	0	3	0	0	0	0	0	0	3	3	3	0	0	0	3	0	0	0	0	0	0	0	0	3	3	3	0	0	0	3	0	0	3	0	0	0	0	0	0	0	0
O75487	GPC4	Glypican-4	GPC4_HUMAN	7.76e-21	10	10	10	10	10	10	0	0	0	10	10	10	10	10	10	10	10	10	10	0	0	10	10	10	10	10	10	10	10	10	10	10	0	10	10	10	10	10	10	10	10	10	10	10	10
O75503	CLN5	Ceroid-lipofuscinosis neuronal protein 5	CLN5_HUMAN	1.92e-18	10	10	10	10	10	10	10	10	10	10	10	10	10	10	10	10	10	10	10	10	10	10	10	10	10	10	10	10	10	10	10	10	0	10	10	10	10	10	10	10	10	10	10	10	10
O75531	BANF1	Barrier-to-autointegration factor	BAF_HUMAN	5.98e-29	4	4	4	4	4	4	4	4	4	4	4	4	4	4	4	4	0	4	4	4	4	4	4	4	4	4	4	4	4	4	4	4	4	4	4	4	4	4	4	4	4	4	4	4	4
O75594	PGLYRP1	Peptidoglycan recognition protein 1	PGRP1_HUMAN	2.1e-14	6	6	6	6	6	6	6	6	6	6	6	6	6	6	6	6	6	6	6	6	6	6	6	6	6	6	6	6	6	6	6	6	6	6	6	6	6	6	6	6	6	6	6	6	6
O75608	LYPLA1	Acyl-protein thioesterase 1	LYPA1_HUMAN	9.35e-27	3	3	3	3	3	3	0	0	0	3	3	3	3	3	3	3	3	3	3	0	0	3	3	3	3	3	3	3	3	3	0	3	0	3	3	3	3	3	3	3	3	3	3	3	3
O75629	CREG1	Protein CREG1	CREG1_HUMAN	2.81e-24	2	2	2	2	2	2	2	2	0	2	2	2	2	2	2	0	2	0	2	0	0	2	2	2	2	2	2	2	2	2	2	0	0	2	2	2	2	2	2	2	2	2	2	2	2
O75635	SERPINB7	Serpin B7	SPB7_HUMAN	9.17e-10	3	3	3	3	3	3	3	3	3	3	3	3	3	3	3	3	3	3	3	0	0	3	3	3	0	3	3	3	3	3	3	3	3	3	3	3	3	0	0	3	3	0	3	0	0
O75636	FCN3	Ficolin-3	FCN3_HUMAN	1.19e-11	0	2	0	2	0	0	0	0	0	2	2	2	2	2	2	0	2	0	2	0	0	0	0	0	0	0	0	2	2	0	0	0	0	2	0	2	2	2	0	0	0	0	0	0	0
O75674	TOM1L1	TOM1-like protein 1	TM1L1_HUMAN	5.98e-29	2	2	0	2	0	0	2	2	0	2	2	2	2	2	2	2	2	2	2	0	0	2	0	2	2	2	2	2	2	2	0	2	0	2	2	2	2	2	2	2	2	2	2	0	2
O75752	B3GALNT1	UDP-GalNAc:beta-1,3-N-acetylgalactosaminyltransferase 1	B3GL1_HUMAN	4.57e-21	3	3	3	3	3	3	0	0	0	3	3	3	3	3	0	3	3	0	3	0	0	3	3	3	3	3	3	3	3	3	3	3	0	3	3	3	3	3	3	0	0	0	3	0	0
O75787	ATP6AP2	Renin receptor	RENR_HUMAN	1.41e-24	10	10	10	10	10	10	10	10	10	10	10	10	10	10	10	10	10	10	10	10	10	10	10	10	10	10	10	10	10	10	10	10	10	10	10	10	10	10	10	10	10	10	10	10	10
O75841	UPK1B	Uroplakin-1b	UPK1B_HUMAN	2.65e-15	4	4	4	0	0	0	0	0	0	4	4	0	4	4	4	4	4	4	4	0	0	0	4	0	4	4	4	0	4	4	4	4	4	4	0	4	4	4	4	0	0	0	4	0	0
O75874	IDH1	Isocitrate dehydrogenase [NADP] cytoplasmic	IDHC_HUMAN	1.68e-17	17	17	17	17	17	17	0	17	0	17	17	17	17	17	17	17	17	17	17	17	17	17	17	17	17	17	17	17	17	17	17	17	17	17	17	17	17	17	17	17	17	17	17	17	17
O75882	ATRN	Attractin	ATRN_HUMAN	1.16e-26	45	45	45	45	45	45	45	45	45	45	45	45	45	45	45	45	45	45	45	45	45	45	45	45	45	45	45	45	45	45	45	45	45	45	45	45	45	45	45	45	45	45	45	45	45
O75891	ALDH1L1	Cytosolic 10-formyltetrahydrofolate dehydrogenase	AL1L1_HUMAN	1.07e-24	22	22	22	22	22	22	0	0	22	22	22	22	22	22	22	22	22	22	22	22	22	22	22	22	22	22	22	22	22	22	22	22	0	22	22	22	22	22	22	22	22	22	22	22	22
O75936	BBOX1	Gamma-butyrobetaine dioxygenase	BODG_HUMAN	4.63e-20	10	10	10	10	10	10	0	0	0	10	10	10	10	10	10	10	10	10	10	10	10	10	10	10	10	10	10	10	10	10	10	10	0	10	10	10	10	10	10	10	10	10	10	10	10
O75952	CABYR	Calcium-binding tyrosine phosphorylation-regulated protein	CABYR_HUMAN	2.46e-16	0	0	0	0	0	0	0	0	0	0	2	0	0	2	2	0	0	0	2	0	0	0	0	0	0	0	0	0	2	0	0	0	0	2	0	2	0	0	0	2	2	2	0	2	2
O75955	FLOT1	Flotillin-1	FLOT1_HUMAN	9.58e-24	5	5	5	5	0	5	0	0	0	5	5	5	5	5	5	5	5	5	5	0	0	0	0	5	5	5	5	5	5	5	5	5	0	5	5	5	5	5	5	5	5	5	5	5	0
O75969	AKAP3	A-kinase anchor protein 3	AKAP3_HUMAN	2.12e-20	0	0	0	6	6	0	0	0	0	0	6	0	6	0	6	0	0	0	6	0	0	0	0	0	6	6	0	6	6	6	0	6	0	0	0	0	6	0	0	6	6	6	0	6	6
O75976	CPD	Carboxypeptidase D	CBPD_HUMAN	2.26e-20	5	5	5	5	5	5	5	5	5	5	5	5	5	5	5	5	5	5	5	5	5	5	5	5	5	5	5	5	5	5	5	5	0	5	5	5	5	5	5	5	5	5	5	5	5
O76003	GLRX3	Glutaredoxin-3	GLRX3_HUMAN	3.37e-05	0	0	2	2	0	2	2	2	2	2	2	2	2	2	2	0	2	2	2	2	2	2	2	0	2	2	2	2	2	2	2	0	2	2	2	2	2	2	2	2	2	2	2	0	0
O76027	ANXA9	Annexin A9	ANXA9_HUMAN	1.28e-06	0	0	2	0	2	0	0	0	0	0	0	0	2	2	2	0	2	0	2	0	0	0	0	0	0	0	2	2	2	2	0	0	0	2	0	2	0	0	2	0	0	0	2	0	0
O76070	SNCG	Gamma-synuclein	SYUG_HUMAN	1.52e-13	6	0	6	6	6	0	6	6	0	6	6	6	6	6	6	0	0	0	6	6	6	6	6	6	6	6	6	6	6	6	6	6	6	6	6	6	6	0	6	0	0	0	6	0	6
O76076	WISP2	WNT1-inducible-signaling pathway protein 2	WISP2_HUMAN	1.73e-19	7	7	7	7	7	7	7	7	7	7	7	7	7	7	7	7	7	7	7	7	7	7	7	7	7	7	7	7	7	7	7	7	7	7	7	7	7	7	7	7	7	7	7	7	7
O94760	DDAH1	N(G),N(G)-dimethylarginine dimethylaminohydrolase 1	DDAH1_HUMAN	3.12e-19	12	12	12	12	12	12	12	12	12	12	12	12	12	12	12	12	12	12	12	12	12	12	12	12	12	12	12	12	12	12	12	12	12	12	12	12	12	12	12	12	12	12	12	12	12
O94772	LY6H	Lymphocyte antigen 6H	LY6H_HUMAN	1.7e-19	4	4	4	4	4	4	4	4	4	4	4	4	4	4	4	4	4	4	4	4	4	4	4	4	4	4	4	4	4	4	4	4	4	4	4	4	4	4	4	4	4	4	4	4	4
O94832	MYO1D	Unconventional myosin-Id	MYO1D_HUMAN	1.14e-19	15	15	15	15	15	15	15	15	15	15	15	15	15	15	15	15	15	15	15	0	15	15	15	15	15	15	15	15	15	15	15	15	0	15	15	15	15	15	15	15	15	15	15	15	15
O94856	NFASC	Neurofascin	NFASC_HUMAN	1.82e-20	3	3	3	3	3	3	3	3	3	3	3	3	3	3	3	3	3	3	3	3	0	3	3	3	3	3	3	3	3	3	3	3	0	3	3	3	3	3	3	3	3	0	3	3	0
O94905	ERLIN2	Erlin-2	ERLN2_HUMAN	3.77e-09	0	4	0	4	4	4	0	0	0	4	4	0	4	4	4	0	0	0	4	0	0	0	0	4	0	0	4	4	4	4	0	0	0	4	4	4	4	0	0	4	0	0	4	0	0
O94910	ADGRL1	Adhesion G protein-coupled receptor L1	AGRL1_HUMAN	2.32e-18	16	16	16	16	16	16	16	16	16	16	16	16	16	16	16	16	16	16	16	16	16	16	16	16	16	16	16	16	16	16	16	16	16	16	16	16	16	16	16	16	16	16	16	16	16
O94919	ENDOD1	Endonuclease domain-containing 1 protein	ENDD1_HUMAN	2.07e-26	17	17	17	17	17	17	17	17	17	17	17	17	17	17	17	17	17	17	17	17	17	17	17	17	17	17	17	17	17	17	17	17	17	17	17	17	17	17	17	17	17	17	17	17	17
O94985	CLSTN1	Calsyntenin-1	CSTN1_HUMAN	3.59e-16	6	6	6	6	6	6	6	6	6	6	6	6	6	0	6	6	6	6	6	6	6	6	6	6	6	6	6	6	6	6	6	6	6	6	6	6	6	6	6	6	6	6	6	6	6
O94991	SLITRK5	SLIT and NTRK-like protein 5	SLIK5_HUMAN	1.46e-13	3	3	0	3	0	3	0	0	0	3	3	3	3	3	3	0	3	0	3	0	0	0	0	0	3	3	3	3	3	3	3	0	0	3	3	3	3	3	3	0	0	0	3	0	3
O95084	PRSS23	Serine protease 23	PRS23_HUMAN	3.65e-14	2	2	2	0	0	2	0	0	0	2	2	2	2	2	2	0	0	0	2	2	2	2	2	2	2	2	2	2	2	0	2	2	0	2	2	2	2	2	2	2	2	2	2	2	2
O95154	AKR7A3	Aflatoxin B1 aldehyde reductase member 3	ARK73_HUMAN	8.8e-23	5	5	5	5	5	5	0	5	0	5	5	5	5	5	5	5	5	5	5	0	0	5	5	5	5	5	5	5	5	5	5	5	0	5	5	5	5	5	5	5	5	5	5	5	5
O95171	SCEL	Sciellin	SCEL_HUMAN	3.04e-27	32	32	32	32	32	32	32	32	32	32	32	32	32	32	32	32	32	32	32	32	32	32	32	32	32	32	32	32	32	32	32	32	32	32	32	32	32	32	0	32	32	32	32	32	32
O95185	UNC5C	Netrin receptor UNC5C	UNC5C_HUMAN	1.25e-18	4	4	4	4	4	4	4	4	4	4	4	4	4	0	4	4	4	4	4	4	4	4	4	4	4	4	4	4	4	4	4	4	0	4	4	4	4	4	4	4	4	4	4	4	4
O95274	LYPD3	Ly6/PLAUR domain-containing protein 3	LYPD3_HUMAN	2.21e-23	7	7	7	7	7	7	7	7	7	7	7	7	7	7	7	7	7	7	7	7	7	7	7	7	7	7	7	7	7	7	7	7	7	7	7	7	7	7	7	7	7	7	7	7	7
O95297	MPZL1	Myelin protein zero-like protein 1	MPZL1_HUMAN	6.82e-21	3	3	3	3	3	3	3	3	3	3	3	3	3	3	3	3	3	3	3	3	3	3	3	3	3	3	3	3	3	3	3	3	0	3	3	3	3	3	3	3	0	0	3	0	0
O95336	PGLS	6-phosphogluconolactonase	6PGL_HUMAN	6.31e-25	13	13	13	13	13	13	13	13	13	13	13	13	13	13	13	13	13	13	13	13	13	13	13	13	13	13	13	13	13	13	13	13	13	13	13	13	13	13	13	13	13	13	13	13	13
O95340	PAPSS2	Bifunctional 3'-phosphoadenosine 5'-phosphosulfate synthase 2	PAPS2_HUMAN	2.33e-14	0	0	0	0	0	0	0	0	0	4	4	4	4	4	4	0	0	0	4	0	0	4	0	0	0	4	0	4	4	0	0	0	0	4	0	0	4	0	0	0	0	0	0	0	0
O95359	TACC2	Transforming acidic coiled-coil-containing protein 2	TACC2_HUMAN	6.58e-05	0	0	0	0	0	0	0	0	0	0	0	0	2	2	2	0	0	0	0	0	0	0	0	0	2	2	2	0	2	2	0	0	0	2	2	0	0	0	2	0	0	0	2	0	0
O95361	TRIM16	Tripartite motif-containing protein 16	TRI16_HUMAN	4.82e-12	7	7	7	7	7	7	0	0	7	7	7	7	7	7	7	7	7	7	7	0	0	7	7	7	7	7	7	7	7	7	7	7	0	7	7	7	7	7	7	7	0	7	7	7	7
O95372	LYPLA2	Acyl-protein thioesterase 2	LYPA2_HUMAN	2.27e-24	3	3	3	3	3	3	3	3	3	3	3	3	3	3	3	3	3	3	3	3	3	3	3	3	3	3	3	3	3	3	3	3	3	3	3	3	3	3	3	3	3	3	3	3	3
O95388	WISP1	WNT1-inducible-signaling pathway protein 1	WISP1_HUMAN	1.91e-21	3	3	3	3	3	3	3	3	3	3	3	3	3	3	3	3	3	3	3	3	3	3	3	3	3	3	3	3	3	3	3	3	3	3	3	3	3	3	3	3	3	3	3	3	3
O95428	PAPLN	Papilin	PPN_HUMAN	3.88e-20	2	2	2	2	2	0	2	2	2	2	2	2	2	2	2	2	2	2	2	0	0	2	2	2	2	2	2	0	2	0	2	2	2	2	2	2	2	2	2	2	2	2	2	2	2
O95445	APOM	Apolipoprotein M	APOM_HUMAN	1.42e-14	7	7	7	7	7	7	7	7	7	7	7	7	7	7	7	7	7	7	7	7	0	7	7	7	7	7	7	7	7	7	7	7	7	7	7	7	7	7	7	7	7	7	7	7	7
O95450	ADAMTS2	A disintegrin and metalloproteinase with thrombospondin motifs 2	ATS2_HUMAN	2.48e-08	0	2	2	2	2	2	2	2	2	2	2	2	2	2	2	2	2	2	2	2	2	2	2	2	2	2	2	2	2	2	2	2	2	2	0	2	2	0	2	2	2	2	2	2	2
O95460	MATN4	Matrilin-4	MATN4_HUMAN	6.59e-21	4	4	4	4	4	4	4	4	4	4	4	4	4	4	4	0	4	0	4	4	4	4	4	4	4	4	4	4	4	4	4	4	4	4	4	4	4	4	4	4	4	4	4	4	4
O95490	ADGRL2	Adhesion G protein-coupled receptor L2	AGRL2_HUMAN	2.98e-17	3	3	3	3	3	3	3	3	3	3	3	3	3	3	3	3	3	3	3	3	3	3	3	3	3	3	3	3	3	3	3	3	0	3	3	3	3	3	3	3	3	3	3	3	3
O95497	VNN1	Pantetheinase	VNN1_HUMAN	5.72e-24	12	12	12	12	12	12	12	12	12	12	12	12	12	12	12	12	12	12	12	12	12	12	12	12	12	12	12	12	12	12	12	12	12	12	12	12	12	12	12	12	12	12	12	12	12
O95502	NPTXR	Neuronal pentraxin receptor	NPTXR_HUMAN	1.18e-07	2	2	2	2	2	2	2	2	2	2	2	2	2	2	2	2	2	2	2	2	2	2	2	2	2	2	2	2	2	2	2	2	2	2	2	2	2	2	2	2	2	2	2	2	2
O95571	ETHE1	Persulfide dioxygenase ETHE1, mitochondrial	ETHE1_HUMAN	3.64e-21	4	0	4	0	4	0	0	0	0	4	4	0	4	4	4	0	0	4	4	0	0	4	4	0	4	4	4	4	4	4	0	0	0	4	0	0	0	0	0	4	0	0	4	0	0
O95633	FSTL3	Follistatin-related protein 3	FSTL3_HUMAN	3.86e-15	5	5	5	5	5	5	5	5	5	5	5	5	5	5	5	5	5	5	5	5	5	5	5	5	5	5	5	5	5	5	0	5	0	5	5	5	5	5	5	5	5	5	5	5	5
O95747	OXSR1	Serine/threonine-protein kinase OSR1	OXSR1_HUMAN	8.58e-21	6	6	6	6	6	6	6	6	0	6	6	6	6	6	6	6	6	6	6	0	0	6	6	6	6	6	6	6	6	6	6	6	0	6	6	6	6	6	6	6	6	6	6	6	6
O95757	HSPA4L	Heat shock 70 kDa protein 4L	HS74L_HUMAN	4.42e-05	0	2	0	0	0	0	0	0	0	0	2	0	2	2	2	0	0	0	0	0	0	0	0	0	0	2	2	0	2	0	0	0	0	0	0	2	0	0	0	2	0	0	0	0	0
O95777	LSM8	U6 snRNA-associated Sm-like protein LSm8	LSM8_HUMAN	1.17e-22	2	2	2	0	0	0	0	0	0	2	2	2	2	2	2	0	2	0	2	2	0	2	2	2	2	2	2	2	2	2	2	0	0	2	2	2	0	2	0	0	2	2	2	2	0
O95782	AP2A1	AP-2 complex subunit alpha-1	AP2A1_HUMAN	5.18e-17	5	0	0	0	0	0	0	0	0	5	5	5	5	5	5	0	5	5	5	0	0	5	0	5	5	5	5	5	5	5	0	0	0	5	5	0	5	5	5	5	5	0	5	5	0
O95817	BAG3	BAG family molecular chaperone regulator 3	BAG3_HUMAN	4.58e-18	5	0	5	5	5	5	0	0	0	5	5	5	5	5	5	5	5	0	5	0	0	0	0	5	5	5	5	5	5	5	5	5	0	5	5	5	5	5	0	5	0	0	5	5	0
O95831	AIFM1	Apoptosis-inducing factor 1, mitochondrial	AIFM1_HUMAN	1.83e-05	2	2	0	2	0	2	0	0	0	2	0	0	2	2	2	0	0	0	2	0	0	2	0	0	2	2	2	2	2	2	0	2	0	2	2	2	2	2	2	2	2	0	2	2	2
O95833	CLIC3	Chloride intracellular channel protein 3	CLIC3_HUMAN	3.02e-28	10	10	10	0	0	10	10	0	0	10	10	10	10	10	10	10	10	10	10	0	0	10	10	10	10	10	10	10	10	10	10	10	0	10	10	10	10	10	10	10	10	10	10	10	0
O95834	EML2	Echinoderm microtubule-associated protein-like 2	EMAL2_HUMAN	8.18e-18	3	3	3	3	3	3	0	0	0	3	3	3	3	3	3	3	3	3	3	0	0	3	3	3	3	3	3	3	3	3	0	3	0	3	3	3	3	3	3	0	3	3	3	0	3
O95857	TSPAN13	Tetraspanin-13	TSN13_HUMAN	2.9e-14	2	2	2	2	2	2	2	2	2	2	2	2	2	0	2	0	2	2	2	2	2	2	2	2	2	2	2	2	0	2	2	2	0	2	2	2	2	2	0	2	0	2	2	0	2
O95861	BPNT1	3'(2'),5'-bisphosphate nucleotidase 1	BPNT1_HUMAN	5.21e-15	6	6	6	6	6	6	0	0	0	6	6	6	6	6	6	6	6	6	6	0	0	0	0	0	6	6	6	6	6	6	0	0	0	6	6	6	6	6	6	6	6	6	6	6	6
O95865	DDAH2	N(G),N(G)-dimethylarginine dimethylaminohydrolase 2	DDAH2_HUMAN	2.02e-26	13	13	13	13	13	13	13	13	13	13	13	13	13	13	13	13	13	13	13	13	13	13	13	13	13	13	13	13	13	13	13	13	13	13	13	13	13	13	13	13	13	13	13	13	13
O95867	LY6G6C	Lymphocyte antigen 6 complex locus protein G6c	LY66C_HUMAN	1.53e-11	0	2	0	2	2	2	0	0	0	2	2	2	2	2	2	2	2	2	2	0	0	2	2	2	2	2	2	2	2	2	0	0	0	2	2	2	2	2	2	0	0	0	2	0	0
O95881	TXNDC12	Thioredoxin domain-containing protein 12	TXD12_HUMAN	9.47e-08	2	2	2	0	0	0	0	0	0	2	2	2	2	2	2	0	0	0	2	0	0	2	2	2	2	2	2	2	2	2	0	2	0	0	2	0	0	0	0	0	0	0	2	0	0
O95954	FTCD	Formimidoyltransferase-cyclodeaminase	FTCD_HUMAN	2.58e-25	10	10	10	10	10	10	0	0	10	10	10	10	10	10	10	10	10	10	10	10	0	10	10	10	10	10	10	10	10	10	10	10	10	10	10	10	10	10	10	10	10	10	10	10	10
O95967	EFEMP2	EGF-containing fibulin-like extracellular matrix protein 2	FBLN4_HUMAN	1.06e-27	18	18	18	18	18	18	18	18	18	18	18	18	18	18	18	18	18	18	18	18	18	18	18	18	18	18	18	18	18	18	18	18	18	18	18	18	18	18	18	18	18	18	18	18	18
O95969	SCGB1D2	Secretoglobin family 1D member 2	SG1D2_HUMAN	2.08e-23	3	3	3	3	3	3	0	3	3	3	3	3	3	3	3	3	3	3	3	0	0	3	3	3	3	3	3	3	3	3	3	3	3	3	3	3	3	3	3	3	3	3	3	3	3
O95971	CD160	CD160 antigen	BY55_HUMAN	3.26e-20	3	3	3	3	3	3	3	3	3	3	3	3	3	3	3	3	3	3	3	3	3	3	3	3	3	3	3	3	3	3	3	3	3	3	3	3	3	3	3	3	3	3	3	3	3
O95980	RECK	Reversion-inducing cysteine-rich protein with Kazal motifs	RECK_HUMAN	1.58e-22	8	8	8	8	8	8	8	8	8	8	8	8	8	8	8	8	8	8	8	8	8	8	8	8	8	8	8	8	8	8	8	8	0	8	8	8	8	8	8	8	8	8	8	8	8
O95998	IL18BP	Interleukin-18-binding protein	I18BP_HUMAN	6.84e-20	7	7	7	7	7	7	7	7	7	7	7	7	7	7	7	7	7	7	7	7	7	7	7	7	7	7	7	7	7	7	7	7	7	7	7	7	7	7	7	7	7	7	7	7	7
O96009	NAPSA	Napsin-A	NAPSA_HUMAN	5.31e-26	7	7	7	7	7	7	7	7	7	7	7	7	7	7	7	7	7	7	7	7	7	7	7	7	7	7	7	7	7	7	7	7	7	7	7	7	7	7	7	7	7	7	7	7	7
O96033	MOCS2	Molybdopterin synthase sulfur carrier subunit	MOC2A_HUMAN	7.77e-14	4	4	4	4	4	4	4	4	4	4	4	4	4	4	4	4	4	4	4	4	4	4	4	4	4	4	4	4	4	4	4	4	4	4	4	4	4	4	4	4	4	4	4	4	4
P00167	CYB5A	Cytochrome b5	CYB5_HUMAN	4.75e-21	4	4	4	4	4	4	0	0	0	4	4	4	4	4	4	0	0	0	4	0	4	4	4	4	4	4	4	4	4	4	4	4	4	4	4	4	4	4	4	4	0	0	4	0	0
P00326	ADH1C	Alcohol dehydrogenase 1C	ADH1G_HUMAN	1.61e-18	3	3	3	0	3	3	0	0	0	3	3	3	3	0	3	0	0	0	3	0	0	0	0	0	3	3	3	0	0	0	3	0	0	3	3	3	3	3	3	3	3	3	3	3	3
P00338	LDHA	L-lactate dehydrogenase A chain	LDHA_HUMAN	2.95e-21	18	18	18	18	18	18	18	18	18	18	18	18	18	18	18	18	18	18	18	18	0	18	18	18	18	18	18	18	18	18	18	18	18	18	18	18	18	18	18	18	18	18	18	18	18
P00352	ALDH1A1	Retinal dehydrogenase 1	AL1A1_HUMAN	2.07e-25	25	25	25	25	25	25	25	25	25	25	25	25	25	25	25	25	25	25	25	0	25	25	25	25	25	25	25	25	25	25	25	25	25	25	25	25	25	25	25	25	25	25	25	25	25
P00367	GLUD1	Glutamate dehydrogenase 1, mitochondrial	DHE3_HUMAN	3.69e-11	0	4	0	4	4	0	0	0	0	4	4	4	4	4	4	4	0	4	4	0	0	4	4	0	4	4	4	4	4	4	0	0	0	4	4	4	4	4	4	0	0	4	4	0	0
P00387	CYB5R3	NADH-cytochrome b5 reductase 3	NB5R3_HUMAN	4.12e-08	0	2	0	2	0	2	0	0	0	2	0	2	2	2	2	0	0	0	2	0	0	0	2	0	0	2	2	2	2	2	0	0	0	2	2	2	2	2	2	2	0	2	2	0	0
P00390	GSR	Glutathione reductase, mitochondrial	GSHR_HUMAN	5.98e-29	11	11	11	11	11	11	0	0	0	11	11	11	11	11	11	11	11	11	11	0	0	11	11	11	11	11	11	11	11	11	11	11	0	11	11	11	11	11	11	11	11	11	11	11	11
P00403	MT-CO2	Cytochrome c oxidase subunit 2	COX2_HUMAN	3.65e-19	0	0	0	0	2	0	2	2	2	2	0	2	2	2	2	0	2	2	2	2	2	2	2	2	2	2	2	2	2	2	2	2	0	2	2	2	2	2	2	2	2	2	2	2	2
P00439	PAH	Phenylalanine-4-hydroxylase	PH4H_HUMAN	1.06e-11	0	0	0	0	0	0	0	0	0	2	2	2	2	2	2	2	2	0	2	0	0	0	0	0	2	0	0	2	0	2	0	0	0	2	2	2	2	2	2	0	0	0	2	0	0
P00441	SOD1	Superoxide dismutase [Cu-Zn]	SODC_HUMAN	5.98e-29	8	8	8	8	8	8	8	8	8	8	8	8	8	8	8	8	8	8	8	8	8	8	8	8	8	8	8	8	8	8	8	8	8	8	8	8	8	8	8	8	8	8	8	8	8
P00450	CP	Ceruloplasmin	CERU_HUMAN	1.61e-24	49	49	49	49	49	49	49	49	49	49	49	49	49	49	49	49	49	49	49	49	49	49	49	49	49	49	49	49	49	49	49	49	49	49	49	49	49	49	49	49	49	49	49	49	49
P00491	PNP	Purine nucleoside phosphorylase	PNPH_HUMAN	3.41e-22	15	15	15	15	15	15	0	15	0	15	15	15	15	15	15	15	15	15	15	15	0	15	15	15	15	15	15	15	15	15	15	15	0	15	15	15	15	15	15	15	15	15	15	15	15
P00492	HPRT1	Hypoxanthine-guanine phosphoribosyltransferase	HPRT_HUMAN	1.97e-22	7	7	7	7	7	7	0	0	0	7	7	7	7	7	7	7	7	7	7	0	0	7	7	7	7	7	7	7	7	7	7	0	0	7	7	7	7	7	7	7	7	7	7	7	7
P00505	GOT2	Aspartate aminotransferase, mitochondrial	AATM_HUMAN	6.66e-21	10	10	10	10	10	10	0	0	0	10	10	10	10	10	10	10	10	10	10	0	0	10	10	10	10	10	10	10	10	10	10	10	0	10	10	10	10	10	10	10	10	10	10	10	10
P00533	EGFR	Epidermal growth factor receptor	EGFR_HUMAN	2.57e-17	3	3	3	3	3	3	0	0	0	3	3	3	3	3	3	3	3	3	3	0	0	3	3	3	3	3	3	3	3	3	3	3	0	3	3	3	3	3	3	3	3	3	3	3	3
P00558	PGK1	Phosphoglycerate kinase 1	PGK1_HUMAN	7.22e-22	29	29	29	29	29	29	29	29	29	29	29	29	29	29	29	29	29	29	29	29	29	29	29	29	29	29	29	29	29	29	29	29	29	29	29	29	29	29	29	29	29	29	29	29	29
P00568	AK1	Adenylate kinase isoenzyme 1	KAD1_HUMAN	6.08e-16	5	5	5	5	5	5	5	5	5	5	5	5	5	5	5	5	5	0	5	5	5	5	5	5	5	5	5	5	5	5	5	5	0	5	5	5	5	5	5	5	5	5	5	5	5
P00734	F2	Prothrombin	THRB_HUMAN	5.98e-29	28	28	28	28	28	28	28	28	28	28	28	28	28	28	28	28	28	28	28	28	28	28	28	28	28	28	28	28	28	28	28	28	28	28	28	28	28	28	28	28	28	28	28	28	28
P00736	C1R	Complement C1r subcomponent	C1R_HUMAN	8.98e-19	10	10	10	10	10	10	10	0	0	10	10	10	10	10	10	10	10	10	10	10	0	10	10	10	10	10	10	10	10	10	10	10	0	10	10	10	10	10	10	10	0	10	10	10	10
P00738	HP	Haptoglobin	HPT_HUMAN	5.98e-29	31	31	31	31	31	31	31	31	31	31	31	31	31	31	31	31	31	31	31	31	31	31	31	31	31	31	31	31	31	31	31	31	31	31	31	31	31	31	31	31	31	31	31	31	31
P00739	HPR	Haptoglobin-related protein	HPTR_HUMAN	6.69e-16	4	0	4	0	0	4	0	0	0	4	4	4	4	4	4	4	4	4	4	0	0	4	4	4	4	4	4	4	4	4	4	0	0	4	4	4	4	4	4	4	0	0	4	0	0
P00740	F9	Coagulation factor IX	FA9_HUMAN	2.3e-17	4	4	4	4	4	4	4	4	4	4	4	4	4	0	4	4	4	4	4	4	4	4	4	4	4	4	4	4	4	4	4	4	4	4	4	4	4	4	4	4	4	4	4	4	4
P00742	F10	Coagulation factor X	FA10_HUMAN	3.08e-07	3	3	0	3	0	0	3	3	3	3	3	3	0	3	3	3	3	3	3	3	3	0	3	3	3	3	3	0	0	0	3	3	3	3	3	3	3	0	3	0	0	3	3	3	3
P00746	CFD	Complement factor D	CFAD_HUMAN	5.98e-29	8	8	8	8	8	8	0	8	8	8	8	8	8	8	8	8	8	8	8	8	8	8	8	8	8	8	8	8	8	8	8	8	8	8	8	8	8	8	8	8	8	8	8	8	8
P00747	PLG	Plasminogen	PLMN_HUMAN	9.18e-27	47	47	47	47	47	47	47	47	47	47	47	47	47	47	47	47	47	47	47	47	47	47	47	47	47	47	47	47	47	47	47	47	47	47	47	47	47	47	47	47	47	47	47	47	47
P00748	F12	Coagulation factor XII	FA12_HUMAN	1.7e-24	7	7	7	7	7	7	7	0	0	7	7	7	7	7	7	7	7	7	7	7	7	7	7	7	7	7	7	7	7	7	7	7	7	7	7	7	7	7	7	7	7	7	7	7	7
P00749	PLAU	Urokinase-type plasminogen activator	UROK_HUMAN	1.86e-22	24	24	24	24	24	24	24	24	24	24	24	24	24	24	24	24	24	24	24	24	24	24	24	24	24	24	24	24	24	24	24	24	24	24	24	24	24	24	24	24	24	24	24	24	24
P00750	PLAT	Tissue-type plasminogen activator	TPA_HUMAN	7.3e-15	2	2	2	2	2	2	0	0	0	2	2	2	2	2	2	0	2	2	2	2	0	2	2	2	2	2	2	2	2	2	2	2	0	2	2	2	2	2	2	2	0	2	2	2	2
P00751	CFB	Complement factor B	CFAB_HUMAN	1.47e-21	33	33	33	33	33	33	33	33	33	33	33	33	33	33	33	33	33	33	33	33	33	33	33	33	33	33	33	33	33	33	33	33	33	33	33	33	33	33	33	33	33	33	33	33	33
P00915	CA1	Carbonic anhydrase 1	CAH1_HUMAN	2.61e-25	15	15	15	15	15	15	15	15	15	15	15	15	15	15	15	15	15	15	15	15	15	15	15	15	15	15	15	15	15	15	15	15	15	15	15	15	15	15	15	15	15	15	15	15	15
P00918	CA2	Carbonic anhydrase 2	CAH2_HUMAN	5.98e-29	15	15	15	15	15	15	15	15	15	15	15	15	15	15	15	15	15	15	15	15	15	15	15	15	15	15	15	15	15	15	15	15	15	15	15	15	15	15	15	15	15	15	15	15	15
P00966	ASS1	Argininosuccinate synthase	ASSY_HUMAN	5.98e-29	19	19	19	19	19	19	19	0	0	19	19	19	19	19	19	19	19	19	19	19	19	19	19	19	19	19	19	19	19	19	19	19	19	19	19	19	19	19	19	19	19	19	19	19	19
P00995	SPINK1	Serine protease inhibitor Kazal-type 1	ISK1_HUMAN	1.38e-14	4	4	4	4	4	4	4	4	4	4	4	4	4	4	4	4	4	4	4	4	4	4	4	4	4	4	4	4	4	4	4	4	4	4	4	4	4	4	4	4	4	4	4	4	4
P01008	SERPINC1	Antithrombin-III	ANT3_HUMAN	5.98e-29	28	28	28	28	28	28	28	28	28	28	28	28	28	28	28	28	28	28	28	28	28	28	28	28	28	28	28	28	28	28	28	28	28	28	28	28	28	28	28	28	28	28	28	28	28
P01009	SERPINA1	Alpha-1-antitrypsin	A1AT_HUMAN	1.67e-25	33	33	33	33	33	33	33	33	33	33	33	33	33	33	33	33	33	33	33	33	33	33	33	33	33	33	33	33	33	33	33	33	33	33	33	33	33	33	33	33	33	33	33	33	33
P01011	SERPINA3	Alpha-1-antichymotrypsin	AACT_HUMAN	1.54e-28	21	21	21	21	21	21	21	21	21	21	21	21	21	21	21	21	21	21	21	21	21	21	21	21	21	21	21	21	21	21	21	21	21	21	21	21	21	21	21	21	21	21	21	21	21
P01019	AGT	Angiotensinogen	ANGT_HUMAN	5.98e-29	13	13	13	13	13	13	13	13	0	13	13	13	13	13	13	13	13	13	13	13	13	13	13	13	13	13	13	13	13	13	13	13	13	13	13	13	13	13	13	13	13	13	13	13	13
P01023	A2M	Alpha-2-macroglobulin	A2MG_HUMAN	1.62e-24	65	65	65	65	65	65	65	65	65	65	65	65	65	65	65	65	65	65	65	65	65	65	65	65	65	65	65	65	65	65	65	65	65	65	65	65	65	65	65	65	65	65	65	65	65
P01024	C3	Complement C3	CO3_HUMAN	5.98e-29	104	104	104	104	104	104	104	104	104	104	104	104	104	104	104	104	104	104	104	104	104	104	104	104	104	104	104	104	104	104	104	104	104	104	104	104	104	104	104	104	104	104	104	104	104
P01031	C5	Complement C5	CO5_HUMAN	4.2e-15	19	19	19	19	19	19	0	0	0	19	19	19	19	19	19	19	19	0	19	0	0	19	19	19	19	19	19	19	19	19	19	19	0	19	19	19	19	19	19	0	19	19	19	19	19
P01033	TIMP1	Metalloproteinase inhibitor 1	TIMP1_HUMAN	5.31e-23	6	6	6	6	6	6	6	6	0	6	6	6	6	6	6	6	6	6	6	6	6	6	6	6	6	6	6	6	6	6	6	6	0	6	6	6	6	6	6	6	6	6	6	6	6
P01034	CST3	Cystatin-C	CYTC_HUMAN	2.11e-22	8	8	8	8	8	8	8	8	8	8	8	8	8	8	8	8	8	8	8	8	8	8	8	8	8	8	8	8	8	8	8	8	8	8	8	8	8	8	8	8	8	8	8	8	8
P01036	CST4	Cystatin-S	CYTS_HUMAN	1.84e-16	9	9	9	9	9	9	9	9	9	9	9	9	9	9	9	9	9	9	9	9	9	9	9	9	9	9	9	9	9	9	9	9	0	9	9	9	9	9	9	9	9	9	9	9	9
P01040	CSTA	Cystatin-A	CYTA_HUMAN	5.98e-29	11	11	11	11	11	11	11	11	11	11	11	11	11	11	11	11	11	11	11	11	11	11	11	11	11	11	11	11	11	11	11	11	11	11	11	11	11	11	11	11	11	11	11	11	11
P01042	KNG1	Kininogen-1	KNG1_HUMAN	1.6e-24	39	39	39	39	39	39	39	39	39	39	39	39	39	39	39	39	39	39	39	39	39	39	39	39	39	39	39	39	39	39	39	39	39	39	39	39	39	39	39	39	39	39	39	39	39
P01111	NRAS	GTPase NRas	RASN_HUMAN	6.17e-15	3	3	3	3	3	3	3	3	3	3	3	3	3	3	3	3	3	3	3	0	0	3	3	3	3	3	3	3	3	3	3	3	0	3	3	3	3	3	3	3	3	3	3	3	3
P01112	HRAS	GTPase HRas	RASH_HUMAN	3.25e-12	2	2	2	2	2	2	0	0	0	2	2	0	2	2	2	0	0	0	2	0	0	0	0	0	2	2	2	2	2	2	0	2	0	2	0	2	2	0	2	0	0	0	2	0	0
P01127	PDGFB	Platelet-derived growth factor subunit B	PDGFB_HUMAN	1.09e-14	2	2	2	2	2	2	2	2	2	2	2	2	2	2	2	2	2	2	2	2	2	2	2	2	2	2	2	2	2	2	2	2	2	2	2	2	2	2	2	2	2	2	2	2	2
P01130	LDLR	Low-density lipoprotein receptor	LDLR_HUMAN	4.88e-27	5	5	5	5	5	5	5	5	5	5	5	5	5	5	5	5	5	5	5	5	5	5	5	5	5	5	5	5	5	5	5	5	5	5	5	5	5	5	5	5	5	5	5	5	5
P01133	EGF	Pro-epidermal growth factor	EGF_HUMAN	1.77e-28	53	53	53	53	53	53	53	53	53	53	53	53	53	53	53	53	53	53	53	53	53	53	53	53	53	53	53	53	53	53	53	53	53	53	53	53	53	53	53	53	53	53	53	53	53
P01210	PENK	Proenkephalin-A	PENK_HUMAN	3.38e-13	3	3	3	3	3	3	3	3	3	3	3	3	3	3	3	3	3	3	3	3	3	3	3	3	3	3	3	3	3	3	3	3	3	3	3	3	3	3	3	3	3	3	3	3	3
P01215	CGA	Glycoprotein hormones alpha chain	GLHA_HUMAN	7.81e-09	2	2	2	2	2	2	2	2	2	2	2	2	2	2	2	2	2	2	2	2	2	2	2	2	2	2	2	2	2	2	2	2	2	2	2	2	2	2	2	2	2	2	2	2	2
P01225	FSHB	Follitropin subunit beta	FSHB_HUMAN	7.31e-16	6	6	6	6	6	6	6	6	6	6	6	6	6	6	6	0	6	6	6	6	6	6	6	6	6	6	6	6	0	6	6	6	6	6	6	6	6	6	6	6	6	6	6	6	6
P01229	LHB	Lutropin subunit beta	LSHB_HUMAN	5.56e-20	2	2	2	2	0	0	2	2	2	2	2	2	2	2	2	2	2	2	2	2	2	2	2	2	2	2	2	2	2	2	2	2	0	2	2	2	2	2	2	2	2	2	2	2	2
P01258	CALCA	Calcitonin	CALC_HUMAN	8.79e-21	5	5	5	5	5	5	5	5	5	5	5	5	5	5	5	5	5	5	5	0	5	5	5	5	5	5	5	5	5	5	5	5	5	5	5	5	5	5	5	5	5	5	5	5	5
P01344	IGF2	Insulin-like growth factor II	IGF2_HUMAN	1.23e-19	3	3	3	3	3	3	3	3	3	3	3	3	3	3	3	3	3	3	3	3	3	3	3	3	3	3	3	3	3	3	3	3	0	3	3	3	3	3	3	3	3	3	3	3	3
P01589	IL2RA	Interleukin-2 receptor subunit alpha	IL2RA_HUMAN	3.53e-23	3	3	3	3	3	3	3	3	3	3	3	3	3	3	3	3	3	3	3	3	3	3	3	3	3	3	3	3	3	3	3	3	3	3	3	3	3	3	3	3	3	3	3	3	3
P01591	JCHAIN	Immunoglobulin J chain	IGJ_HUMAN	1.94e-17	8	8	8	8	8	8	8	8	8	8	8	8	8	8	8	8	8	8	8	8	8	8	8	8	8	8	8	8	8	8	8	8	8	8	8	8	8	8	8	8	8	8	8	8	8
P01599	IGKV1-17	Immunoglobulin kappa variable 1-17	KV117_HUMAN	8.69e-21	2	2	2	2	2	2	0	0	0	2	2	2	2	2	2	2	2	2	2	0	0	2	2	2	2	2	2	2	2	2	2	0	0	2	2	2	2	2	2	2	0	0	2	2	2
P01619	IGKV3-20	Immunoglobulin kappa variable 3-20	KV320_HUMAN	8.93e-20	6	6	6	6	6	6	6	6	6	6	6	6	6	6	6	6	6	6	6	6	6	6	6	6	6	6	6	6	6	6	6	6	6	6	6	6	6	6	6	6	6	6	6	6	6
P01624	IGKV3-15	Immunoglobulin kappa variable 3-15	KV315_HUMAN	1.98e-22	3	3	3	3	3	3	3	3	3	3	3	3	3	3	3	3	3	3	3	3	3	3	3	3	3	3	3	3	3	3	3	3	3	3	3	3	3	3	3	3	3	3	3	3	3
P01700	IGLV1-47	Immunoglobulin lambda variable 1-47	LV147_HUMAN	1.11e-20	3	3	3	3	3	3	3	3	3	3	3	3	3	3	3	3	3	3	3	3	3	3	3	3	3	3	3	3	3	3	3	3	3	3	3	3	3	3	3	3	3	3	3	3	3
P01701	IGLV1-51	Immunoglobulin lambda variable 1-51	LV151_HUMAN	3.17e-20	3	3	3	3	3	3	3	3	3	3	3	3	3	3	3	3	3	3	3	3	3	3	3	3	3	3	3	3	3	3	3	3	3	3	3	3	3	3	3	3	3	3	3	3	3
P01704	IGLV2-14	Immunoglobulin lambda variable 2-14	LV214_HUMAN	7.32e-14	2	2	2	2	2	2	2	0	2	2	2	2	2	2	2	2	2	2	2	0	0	2	2	2	2	2	2	2	2	2	2	2	0	2	2	2	2	2	2	0	2	2	2	0	2
P01714	IGLV3-19	Immunoglobulin lambda variable 3-19	LV319_HUMAN	1.27e-22	3	3	3	3	3	3	3	3	3	3	3	3	3	3	3	3	3	3	3	3	3	3	3	3	3	3	3	3	3	3	3	3	3	3	3	3	3	3	3	3	3	3	3	3	3
P01715	IGLV3-1	Immunoglobulin lambda variable 3-1	LV301_HUMAN	7.39e-18	2	2	2	2	0	2	2	2	2	2	2	2	2	2	2	0	2	2	2	2	2	2	2	2	2	2	2	2	2	2	0	0	0	2	2	2	2	2	2	2	0	0	2	2	0
P01717	IGLV3-25	Immunoglobulin lambda variable 3-25	LV325_HUMAN	8.18e-20	4	4	4	4	4	4	4	4	4	4	4	4	4	4	4	4	4	4	4	4	4	4	4	4	4	4	4	4	4	4	4	4	4	4	4	4	4	4	4	4	4	4	4	4	4
P01721	IGLV6-57	Immunoglobulin lambda variable 6-57	LV657_HUMAN	1.62e-16	3	3	3	3	3	3	3	3	3	3	3	3	3	3	3	3	3	3	3	0	3	3	3	3	3	3	3	3	3	3	3	3	0	3	3	3	3	3	3	3	3	3	3	3	3
P01768;P0DP03	IGHV3-30;IGHV3-30-5	Immunoglobulin heavy variable 3-30;Immunoglobulin heavy variable 3-30-5	HV330_HUMAN;HV335_HUMAN	1.38e-24	4	4	4	4	4	4	4	4	4	4	4	4	4	4	4	4	4	4	4	4	4	4	4	4	4	4	4	4	4	4	4	4	4	4	4	4	4	4	4	4	4	4	4	4	4
P01780	IGHV3-7	Immunoglobulin heavy variable 3-7	HV307_HUMAN	2.42e-17	2	2	2	2	2	2	2	2	2	2	2	2	2	2	2	2	2	2	2	2	2	2	2	2	2	2	2	2	2	2	2	2	2	2	2	2	2	2	2	2	2	2	2	2	2
P01782;P0DP04	IGHV3-9;IGHV3-43D	Immunoglobulin heavy variable 3-9;Immunoglobulin heavy variable 3-43D	HV309_HUMAN;HV43D_HUMAN	3.99e-24	3	3	3	3	3	3	3	3	3	3	3	3	3	3	3	3	3	3	3	3	3	3	3	3	3	3	3	3	3	3	3	3	3	3	3	3	3	3	3	3	3	3	3	3	3
P01833	PIGR	Polymeric immunoglobulin receptor	PIGR_HUMAN	3e-24	43	43	43	43	43	43	43	43	43	43	43	43	43	43	43	43	43	43	43	43	43	43	43	43	43	43	43	43	43	43	43	43	43	43	43	43	43	43	43	43	43	43	43	43	43
P01834	IGKC	Immunoglobulin kappa constant	IGKC_HUMAN	5.3e-12	2	2	2	2	2	2	2	2	2	2	2	2	2	2	2	2	2	2	2	2	2	2	2	2	2	2	2	2	2	2	2	2	2	2	2	2	2	2	2	2	2	2	2	2	2
P01859	IGHG2	Immunoglobulin heavy constant gamma 2	IGHG2_HUMAN	8.59e-27	14	14	14	14	14	14	14	14	14	14	14	14	14	14	14	14	14	14	14	14	14	14	14	14	14	14	14	14	14	14	14	14	14	14	14	14	14	14	14	14	14	14	14	14	14
P01860	IGHG3	Immunoglobulin heavy constant gamma 3	IGHG3_HUMAN	5.98e-29	7	7	7	7	7	7	7	7	7	7	7	7	7	7	7	7	7	7	7	7	7	7	7	7	7	7	7	7	7	7	7	7	7	7	7	7	7	7	7	7	7	7	7	7	7
P01861	IGHG4	Immunoglobulin heavy constant gamma 4	IGHG4_HUMAN	1.11e-22	6	6	6	6	6	6	6	6	6	6	6	6	6	6	6	6	6	6	6	0	6	6	6	6	6	6	6	6	6	6	6	6	6	6	6	6	6	6	6	6	6	6	6	6	6
P01871	IGHM	Immunoglobulin heavy constant mu	IGHM_HUMAN	5.98e-29	20	20	20	20	20	20	20	20	20	20	20	20	20	20	20	20	20	20	20	20	20	20	20	20	20	20	20	20	20	20	20	20	20	20	20	20	20	20	20	20	20	20	20	20	20
P01876	IGHA1	Immunoglobulin heavy constant alpha 1	IGHA1_HUMAN	1.88e-22	11	11	11	11	11	11	11	11	11	11	11	11	11	11	11	11	11	11	11	11	11	11	11	11	11	11	11	11	11	11	11	11	11	11	11	11	11	11	11	11	11	11	11	11	11
P01877	IGHA2	Immunoglobulin heavy constant alpha 2	IGHA2_HUMAN	3.1e-16	2	2	2	2	2	2	2	2	2	2	2	2	2	2	2	2	2	2	2	2	2	2	2	2	2	2	2	2	2	2	2	2	2	2	2	2	2	2	2	2	0	2	2	2	0
P01903	HLA-DRA	HLA class II histocompatibility antigen, DR alpha chain	DRA_HUMAN	1.58e-11	0	5	5	0	5	5	5	5	5	5	5	5	5	5	5	5	5	5	5	5	5	5	5	5	5	5	5	5	5	5	5	5	0	5	5	5	5	5	5	0	0	0	5	0	5
P02008	HBZ	Hemoglobin subunit zeta	HBAZ_HUMAN	9.89e-10	0	10	0	0	0	10	0	0	0	10	0	0	10	10	10	10	0	0	10	0	0	10	10	0	10	0	10	10	0	10	0	10	0	10	10	10	0	0	0	0	0	0	10	0	0
P02042	HBD	Hemoglobin subunit delta	HBD_HUMAN	8.19e-25	9	9	9	9	9	9	9	9	9	9	9	9	9	9	9	9	9	9	9	9	9	9	9	9	9	9	9	9	9	9	9	9	9	9	9	9	9	9	9	9	9	9	9	9	9
P02144	MB	Myoglobin	MYG_HUMAN	3.99e-07	0	0	2	2	2	2	0	0	0	2	2	2	2	0	0	0	0	0	0	0	0	0	0	0	0	0	0	0	0	0	0	0	0	2	0	0	2	2	2	0	0	0	2	0	0
P02452	COL1A1	Collagen alpha-1(I) chain	CO1A1_HUMAN	2.71e-22	14	14	14	14	14	14	14	14	14	14	14	14	14	14	14	14	14	14	14	14	14	14	14	14	14	14	14	14	14	14	14	14	14	14	14	14	14	14	14	14	14	14	14	14	14
P02461	COL3A1	Collagen alpha-1(III) chain	CO3A1_HUMAN	4.52e-09	2	2	2	2	2	0	2	2	2	2	2	2	2	2	2	2	2	2	2	2	2	2	2	2	2	2	2	2	2	2	2	2	2	2	2	2	2	2	2	2	2	2	2	2	2
P02511	CRYAB	Alpha-crystallin B chain	CRYAB_HUMAN	4.34e-24	7	7	7	7	7	7	7	7	0	7	7	7	7	7	7	7	7	7	7	7	7	7	7	7	7	7	7	7	7	7	7	7	7	7	7	7	7	7	7	7	7	7	7	7	7
P02533	KRT14	Keratin, type I cytoskeletal 14	K1C14_HUMAN	4.98e-27	38	38	38	38	38	38	38	38	38	38	38	38	38	38	38	38	38	38	38	38	38	38	38	38	38	38	38	38	38	38	38	38	38	38	38	38	38	38	38	38	38	38	38	38	38
P02538	KRT6A	Keratin, type II cytoskeletal 6A	K2C6A_HUMAN	2.61e-25	53	53	53	53	53	53	53	53	53	53	53	53	53	53	53	53	53	53	53	53	53	53	53	53	53	53	53	53	53	53	53	53	53	53	53	53	53	53	53	53	53	53	53	53	53
P02545	LMNA	Prelamin-A/C	LMNA_HUMAN	5.44e-25	39	39	39	39	39	39	39	39	39	39	39	39	39	39	39	39	39	39	39	39	39	39	39	39	39	39	39	39	39	39	39	39	39	39	39	39	39	39	39	39	39	39	39	39	39
P02549	SPTA1	Spectrin alpha chain, erythrocytic 1	SPTA1_HUMAN	6.83e-22	77	77	77	77	77	77	77	77	77	77	77	77	77	77	77	77	77	77	77	77	0	77	77	77	77	77	77	77	77	77	77	77	0	77	77	77	77	77	77	77	77	77	77	77	77
P02647	APOA1	Apolipoprotein A-I	APOA1_HUMAN	5.98e-29	33	33	33	33	33	33	33	33	33	33	33	33	33	33	33	33	33	33	33	33	33	33	33	33	33	33	33	33	33	33	33	33	33	33	33	33	33	33	33	33	33	33	33	33	33
P02649	APOE	Apolipoprotein E	APOE_HUMAN	8.82e-28	20	20	20	20	20	20	20	20	20	20	20	20	20	20	20	20	20	20	20	20	20	20	20	20	20	20	20	20	20	20	20	20	20	20	20	20	20	20	20	20	20	20	20	20	20
P02652	APOA2	Apolipoprotein A-II	APOA2_HUMAN	2.6e-19	7	7	7	7	7	7	7	7	7	7	7	7	7	7	7	7	7	7	7	7	7	7	7	7	7	7	7	7	7	7	7	7	7	7	7	7	7	7	7	7	7	7	7	7	7
P02654	APOC1	Apolipoprotein C-I	APOC1_HUMAN	3.85e-12	4	4	4	4	4	4	4	0	0	4	4	4	4	4	4	4	4	4	4	0	0	0	0	0	4	4	4	4	4	4	0	0	0	4	4	4	4	4	4	4	0	0	4	4	4
P02655	APOC2	Apolipoprotein C-II	APOC2_HUMAN	2.81e-19	3	3	3	3	3	3	3	3	3	3	3	3	3	3	3	3	3	3	3	3	3	3	3	3	3	3	3	3	3	3	3	3	0	3	3	3	3	3	3	3	3	3	3	3	3
P02656	APOC3	Apolipoprotein C-III	APOC3_HUMAN	9.91e-20	3	3	3	3	3	3	3	3	3	3	3	3	3	3	3	3	3	3	3	3	3	3	3	3	3	3	3	3	3	3	3	3	3	3	3	3	3	3	3	3	3	3	3	3	3
P02671	FGA	Fibrinogen alpha chain	FIBA_HUMAN	6.49e-26	40	40	40	40	40	40	40	40	40	40	40	40	40	40	40	40	40	40	40	40	40	40	40	40	40	40	40	40	40	40	40	40	40	40	40	40	40	40	40	40	40	40	40	40	40
P02675	FGB	Fibrinogen beta chain	FIBB_HUMAN	6.5e-25	39	39	39	39	39	39	39	39	39	39	39	39	39	39	39	39	39	39	39	39	39	39	39	39	39	39	39	39	39	39	39	39	39	39	39	39	39	39	39	39	39	39	39	39	39
P02679	FGG	Fibrinogen gamma chain	FIBG_HUMAN	6.65e-24	29	29	29	29	29	29	29	29	29	29	29	29	29	29	29	29	29	29	29	29	29	29	29	29	29	29	29	29	29	29	29	29	0	29	29	29	29	29	29	29	29	29	29	29	29
P02724	GYPA	Glycophorin-A	GLPA_HUMAN	3.77e-05	0	0	0	0	0	0	2	2	2	0	0	0	0	0	0	2	2	2	0	2	2	0	0	0	0	0	0	2	0	0	0	2	0	0	0	0	0	0	0	0	0	0	2	0	0
P02730	SLC4A1	Band 3 anion transport protein	B3AT_HUMAN	9.88e-23	25	25	25	25	25	25	0	0	25	25	25	25	25	25	25	25	25	25	25	0	0	25	25	25	25	25	25	25	25	25	25	25	0	25	25	25	25	25	25	0	0	25	25	25	25
P02741	CRP	C-reactive protein	CRP_HUMAN	9.55e-18	5	5	5	5	5	5	0	0	0	5	5	5	5	5	5	0	5	5	5	0	0	5	5	5	5	5	5	5	5	0	5	5	0	5	5	5	0	0	0	5	5	5	5	5	5
P02743	APCS	Serum amyloid P-component	SAMP_HUMAN	3.39e-18	9	9	9	9	9	9	9	0	0	9	9	9	9	9	9	9	9	9	9	0	0	9	9	9	9	9	9	9	9	9	9	9	9	9	9	9	9	9	9	9	9	9	9	9	9
P02745	C1QA	Complement C1q subcomponent subunit A	C1QA_HUMAN	6.31e-13	0	0	0	0	0	0	0	0	0	2	2	2	2	0	2	2	0	0	0	0	0	2	0	0	0	0	0	2	0	2	0	0	0	0	2	0	0	0	0	0	0	0	2	0	0
P02746	C1QB	Complement C1q subcomponent subunit B	C1QB_HUMAN	4.25e-13	5	5	5	5	5	5	5	5	5	5	5	5	5	5	5	5	5	5	5	5	5	5	5	5	5	5	5	5	5	5	5	5	5	5	5	5	5	5	5	5	5	5	5	5	5
P02747	C1QC	Complement C1q subcomponent subunit C	C1QC_HUMAN	5.67e-18	5	5	0	5	5	0	0	0	0	5	5	5	5	5	5	5	5	0	5	0	0	5	5	0	0	5	5	5	5	5	5	0	0	0	5	5	5	5	5	0	0	0	5	0	0
P02748	C9	Complement component C9	CO9_HUMAN	1.36e-24	17	17	17	17	17	17	17	17	17	17	17	17	17	17	17	17	17	17	17	17	17	17	17	17	17	17	17	17	17	17	17	17	17	17	17	17	17	17	17	17	17	17	17	17	17
P02749	APOH	Beta-2-glycoprotein 1	APOH_HUMAN	7.77e-27	24	24	24	24	24	24	24	24	24	24	24	24	24	24	24	24	24	24	24	24	24	24	24	24	24	24	24	24	24	24	24	24	24	24	24	24	24	24	24	24	24	24	24	24	24
P02750	LRG1	Leucine-rich alpha-2-glycoprotein	A2GL_HUMAN	7.58e-21	16	16	16	16	16	16	16	16	16	16	16	16	16	16	16	16	16	16	16	16	16	16	16	16	16	16	16	16	16	16	16	16	16	16	16	16	16	16	16	16	16	16	16	16	16
P02751	FN1	Fibronectin	FINC_HUMAN	7.09e-25	94	94	94	94	94	94	94	94	94	94	94	94	94	94	94	94	94	94	94	94	94	94	94	94	94	94	94	94	94	94	94	94	94	94	94	94	94	94	94	94	94	94	94	94	94
P02753	RBP4	Retinol-binding protein 4	RET4_HUMAN	7.15e-27	10	10	10	10	10	10	10	10	10	10	10	10	10	10	10	10	10	10	10	10	10	10	10	10	10	10	10	10	10	10	10	10	10	10	10	10	10	10	10	10	10	10	10	10	10
P02760	AMBP	Protein AMBP	AMBP_HUMAN	6.25e-29	29	29	29	29	29	29	29	29	29	29	29	29	29	29	29	29	29	29	29	29	29	29	29	29	29	29	29	29	29	29	29	29	29	29	29	29	29	29	29	29	29	29	29	29	29
P02763	ORM1	Alpha-1-acid glycoprotein 1	A1AG1_HUMAN	4.83e-23	17	17	17	17	17	17	17	17	17	17	17	17	17	17	17	17	17	17	17	17	17	17	17	17	17	17	17	17	17	17	17	17	17	17	17	17	17	17	17	17	17	17	17	17	17
P02765	AHSG	Alpha-2-HS-glycoprotein	FETUA_HUMAN	1.15e-23	15	15	15	15	15	15	15	15	15	15	15	15	15	15	15	15	15	15	15	15	15	15	15	15	15	15	15	15	15	15	15	15	15	15	15	15	15	15	15	15	15	15	15	15	15
P02766	TTR	Transthyretin	TTHY_HUMAN	1.9e-22	8	8	8	8	8	8	8	8	8	8	8	8	8	8	8	8	8	8	8	8	8	8	8	8	8	8	8	8	8	8	8	8	8	8	8	8	8	8	8	8	8	8	8	8	8
P02768	ALB	Serum albumin	ALBU_HUMAN	4.86e-28	114	114	114	114	114	114	114	114	114	114	114	114	114	114	114	114	114	114	114	114	114	114	114	114	114	114	114	114	114	114	114	114	114	114	114	114	114	114	114	114	114	114	114	114	114
P02774	GC	Vitamin D-binding protein	VTDB_HUMAN	1.49e-28	35	35	35	35	35	35	35	35	35	35	35	35	35	35	35	35	35	35	35	35	35	35	35	35	35	35	35	35	35	35	35	35	35	35	35	35	35	35	35	35	35	35	35	35	35
P02775	PPBP	Platelet basic protein	CXCL7_HUMAN	9.68e-11	4	4	4	4	4	4	0	0	0	4	4	4	4	4	4	4	0	4	4	0	0	4	4	4	4	4	4	4	4	4	0	0	0	4	4	4	4	4	0	0	4	4	4	4	4
P02776	PF4	Platelet factor 4	PLF4_HUMAN	5.12e-15	0	4	0	0	0	4	0	0	0	4	4	4	4	4	4	0	0	0	4	0	0	4	4	4	4	4	4	4	4	4	0	0	0	4	4	0	4	0	4	0	0	0	0	0	0
P02786	TFRC	Transferrin receptor protein 1	TFR1_HUMAN	5.96e-12	2	2	0	2	2	2	0	0	0	2	2	2	2	2	2	2	0	2	2	0	0	2	2	0	2	2	0	0	2	2	2	2	0	0	2	2	2	0	2	2	0	0	2	0	2
P02787	TF	Serotransferrin	TRFE_HUMAN	5.98e-29	67	67	67	67	67	67	67	67	67	67	67	67	67	67	67	67	67	67	67	67	67	67	67	67	67	67	67	67	67	67	67	67	67	67	67	67	67	67	67	67	67	67	67	67	67
P02788	LTF	Lactotransferrin	TRFL_HUMAN	2e-27	57	57	57	57	57	57	57	57	57	57	57	57	57	57	57	57	57	57	57	57	57	57	57	57	57	57	57	57	57	57	57	57	57	57	57	57	57	57	57	57	57	57	57	57	57
P02790	HPX	Hemopexin	HEMO_HUMAN	1.8e-26	30	30	30	30	30	30	30	30	30	30	30	30	30	30	30	30	30	30	30	30	30	30	30	30	30	30	30	30	30	30	30	30	30	30	30	30	30	30	30	30	30	30	30	30	30
P02792	FTL	Ferritin light chain	FRIL_HUMAN	2.94e-24	6	6	6	6	6	6	6	6	6	6	6	6	6	6	6	6	6	0	6	6	6	6	6	6	6	6	6	6	6	6	6	6	0	6	6	6	6	6	6	6	6	6	6	6	6
P02794	FTH1	Ferritin heavy chain	FRIH_HUMAN	1.93e-11	4	0	4	4	0	0	4	4	4	4	4	4	4	4	4	0	4	0	4	4	4	4	4	4	4	4	4	0	4	0	4	4	0	4	4	4	4	4	4	4	4	4	4	4	4
P02795	MT2A	Metallothionein-2	MT2_HUMAN	5.57e-17	4	4	4	4	4	4	4	4	4	4	4	4	4	4	4	4	4	4	4	4	4	4	4	4	4	4	4	4	4	4	4	4	4	4	4	4	4	4	4	4	4	4	4	4	4
P02810	PRH1	Salivary acidic proline-rich phosphoprotein 1/2	PRPC_HUMAN	1.94e-11	3	3	3	3	3	3	3	3	3	3	3	3	3	3	3	3	3	3	3	3	3	3	3	3	3	3	3	3	3	3	3	3	3	3	3	3	3	3	3	3	3	3	3	3	3
P02814	SMR3B	Submaxillary gland androgen-regulated protein 3B	SMR3B_HUMAN	4.87e-20	0	0	0	2	2	2	0	0	0	2	2	0	2	2	2	0	0	0	0	2	2	2	2	2	2	2	2	0	0	0	2	2	0	0	0	2	0	2	2	2	0	0	2	0	0
P03950	ANG	Angiogenin	ANGI_HUMAN	4.66e-16	6	6	6	6	6	6	0	0	0	6	6	6	6	6	6	6	6	6	6	6	6	6	6	6	6	6	6	6	6	6	6	6	0	6	6	6	6	6	6	6	6	6	6	6	6
P03951	F11	Coagulation factor XI	FA11_HUMAN	1.37e-19	8	8	8	8	8	8	8	8	0	8	8	8	8	8	8	8	8	8	8	8	8	8	8	8	8	8	8	8	8	8	8	8	0	8	8	8	8	8	8	0	8	8	8	0	8
P03952	KLKB1	Plasma kallikrein	KLKB1_HUMAN	9.31e-15	9	0	0	9	9	9	0	0	0	9	9	9	9	9	9	9	9	0	9	9	0	9	0	0	9	9	9	9	9	9	9	9	0	9	9	9	9	9	9	0	0	0	9	0	0
P03973	SLPI	Antileukoproteinase	SLPI_HUMAN	3.51e-19	12	12	12	12	12	12	12	12	12	12	12	12	12	12	12	12	12	12	12	12	12	12	12	12	12	12	12	12	12	12	12	12	12	12	12	12	12	12	12	12	12	12	12	12	12
P04003	C4BPA	C4b-binding protein alpha chain	C4BPA_HUMAN	7.03e-18	15	15	15	15	15	0	15	15	15	15	15	15	15	15	15	15	15	15	15	15	15	15	15	15	15	15	15	15	15	15	15	15	0	15	15	15	15	15	15	15	15	15	15	15	15
P04004	VTN	Vitronectin	VTNC_HUMAN	7.87e-23	20	20	20	20	20	20	20	20	20	20	20	20	20	20	20	20	20	20	20	20	20	20	20	20	20	20	20	20	20	20	20	20	20	20	20	20	20	20	20	20	20	20	20	20	20
P04040	CAT	Catalase	CATA_HUMAN	8.72e-24	29	29	29	29	29	29	29	29	29	29	29	29	29	29	29	29	29	29	29	29	29	29	29	29	29	29	29	29	29	29	29	29	0	29	29	29	29	29	29	29	29	29	29	29	29
P04054	PLA2G1B	Phospholipase A2	PA21B_HUMAN	1.14e-15	3	0	3	3	3	0	3	0	0	0	3	3	3	3	0	0	3	0	3	0	0	3	0	0	0	3	3	0	3	0	3	0	0	0	3	3	0	3	0	0	0	0	0	0	0
P04062	GBA	Lysosomal acid glucosylceramidase	GLCM_HUMAN	1.16e-26	10	10	10	10	10	10	0	0	0	10	10	10	10	10	10	10	10	10	10	10	0	10	10	10	10	10	10	10	10	10	10	10	0	10	10	10	10	10	10	10	10	10	10	10	10
P04066	FUCA1	Tissue alpha-L-fucosidase	FUCO_HUMAN	1.13e-23	11	11	11	11	11	11	0	0	0	11	11	11	11	11	11	11	11	11	11	11	0	11	11	11	11	11	11	11	11	11	11	11	0	11	11	11	11	11	11	11	11	11	11	11	11
P04070	PROC	Vitamin K-dependent protein C	PROC_HUMAN	2.1e-16	4	4	0	4	4	4	0	0	0	4	4	4	4	4	4	4	4	0	4	0	0	4	4	4	4	4	4	4	4	4	0	0	0	4	4	4	4	4	4	0	4	0	4	0	4
P04075	ALDOA	Fructose-bisphosphate aldolase A	ALDOA_HUMAN	8.73e-24	21	21	21	21	21	21	21	21	21	21	21	21	21	21	21	21	21	21	21	21	21	21	21	21	21	21	21	21	21	21	21	21	21	21	21	21	21	21	21	21	21	21	21	21	21
P04080	CSTB	Cystatin-B	CYTB_HUMAN	3.87e-21	6	6	6	6	6	6	6	6	6	6	6	6	6	6	6	6	6	6	6	6	6	6	6	6	6	6	6	6	6	6	6	6	6	6	6	6	6	6	6	6	6	6	6	6	6
P04083	ANXA1	Annexin A1	ANXA1_HUMAN	5.98e-29	31	31	31	31	31	31	31	31	31	31	31	31	31	31	31	31	31	31	31	31	31	31	31	31	31	31	31	31	31	31	31	31	31	31	31	31	31	31	31	31	31	31	31	31	31
P04114	APOB	Apolipoprotein B-100	APOB_HUMAN	6.97e-25	115	115	115	115	115	115	115	115	115	115	115	115	115	115	115	115	115	115	115	115	115	115	115	115	115	115	115	115	115	115	115	115	115	115	115	115	115	115	115	115	115	115	115	115	115
P04118	CLPS	Colipase	COL_HUMAN	8.98e-18	3	3	0	3	3	3	3	3	3	3	3	3	3	3	3	3	3	3	3	3	3	3	3	3	3	3	3	3	3	3	3	3	3	3	3	3	3	3	3	3	3	3	3	3	3
P04155	TFF1	Trefoil factor 1	TFF1_HUMAN	2.64e-19	4	4	4	4	4	4	4	4	4	4	4	4	4	4	4	4	4	4	4	4	4	4	4	4	4	4	4	4	4	4	4	4	4	4	4	4	4	4	4	4	4	4	4	4	4
P04156	PRNP	Major prion protein	PRIO_HUMAN	5.28e-13	7	7	7	7	7	7	7	7	7	7	7	7	7	7	7	7	7	7	7	7	7	7	7	7	7	7	7	7	7	7	7	7	7	7	7	7	7	7	7	7	7	7	7	7	7
P04179	SOD2	Superoxide dismutase [Mn], mitochondrial	SODM_HUMAN	5.44e-25	8	8	8	8	8	8	8	8	0	8	8	8	8	8	8	8	8	8	8	0	0	8	8	8	8	8	8	8	8	8	8	8	0	8	8	8	8	8	8	8	0	8	8	8	8
P04180	LCAT	Phosphatidylcholine-sterol acyltransferase	LCAT_HUMAN	1.68e-27	12	12	12	12	12	12	12	12	12	12	12	12	12	12	12	12	12	12	12	0	0	12	12	12	12	12	12	12	12	12	12	12	12	12	12	12	12	12	12	12	12	12	12	12	12
P04196	HRG	Histidine-rich glycoprotein	HRG_HUMAN	2.57e-28	15	15	15	15	15	15	15	15	15	15	15	15	15	15	15	15	15	15	15	15	0	15	15	15	15	15	15	15	15	15	15	15	15	15	15	15	15	15	15	15	15	15	15	15	15
P04211	IGLV7-43	Immunoglobulin lambda variable 7-43	LV743_HUMAN	6.39e-15	3	3	3	3	3	3	3	3	3	3	3	3	3	3	3	3	3	3	3	3	3	3	3	3	3	3	3	3	3	3	3	3	3	3	3	3	3	3	3	3	3	3	3	3	3
P04216	THY1	Thy-1 membrane glycoprotein	THY1_HUMAN	1.89e-21	4	4	4	4	4	4	4	4	4	4	4	4	4	4	4	4	4	4	4	4	4	4	4	4	4	4	4	4	4	4	4	4	4	4	4	4	4	4	4	4	4	4	4	4	4
P04217	A1BG	Alpha-1B-glycoprotein	A1BG_HUMAN	1.78e-24	20	20	20	20	20	20	20	20	20	20	20	20	20	20	20	20	20	20	20	20	20	20	20	20	20	20	20	20	20	20	20	20	20	20	20	20	20	20	20	20	20	20	20	20	20
P04233	CD74	HLA class II histocompatibility antigen gamma chain	HG2A_HUMAN	3.83e-17	3	3	3	3	3	3	3	3	3	3	3	3	3	3	3	3	3	3	3	3	3	3	3	3	3	3	3	3	3	3	3	3	3	3	3	3	3	3	3	3	3	3	3	3	3
P04259	KRT6B	Keratin, type II cytoskeletal 6B	K2C6B_HUMAN	1.31e-19	8	8	8	8	8	8	8	8	8	8	8	8	8	8	8	8	8	8	8	8	8	8	8	8	8	8	8	8	8	8	8	8	8	8	8	8	8	8	8	8	8	8	8	8	8
P04264	KRT1	Keratin, type II cytoskeletal 1	K2C1_HUMAN	5.2e-28	42	42	42	42	42	42	42	42	42	42	42	42	42	42	42	42	42	42	42	42	42	42	42	42	42	42	42	42	42	42	42	42	42	42	42	42	42	42	42	42	42	42	42	42	42
P04275	VWF	von Willebrand factor	VWF_HUMAN	5.43e-23	20	20	20	20	20	20	20	20	20	20	20	20	20	20	20	20	20	20	20	20	20	20	20	20	20	20	20	20	20	20	20	20	20	20	20	20	20	20	20	20	20	20	20	20	20
P04278	SHBG	Sex hormone-binding globulin	SHBG_HUMAN	1.62e-14	3	3	0	3	3	3	0	0	0	3	3	3	3	3	3	3	3	3	3	0	0	3	3	3	3	3	3	3	3	3	3	3	0	3	3	3	3	3	3	0	0	0	3	0	0
P04279	SEMG1	Semenogelin-1	SEMG1_HUMAN	1.55e-19	49	49	49	49	49	49	49	49	49	49	49	49	49	49	49	49	49	49	49	49	49	49	49	49	49	49	49	49	49	49	49	49	49	49	49	49	49	49	49	49	49	49	49	49	49
P04406	GAPDH	Glyceraldehyde-3-phosphate dehydrogenase	G3P_HUMAN	1.67e-25	14	14	14	14	14	14	14	14	14	14	14	14	14	14	14	14	14	14	14	14	14	14	14	14	14	14	14	14	14	14	14	14	14	14	14	14	14	14	14	14	14	14	14	14	14
P04424	ASL	Argininosuccinate lyase	ARLY_HUMAN	2.45e-13	0	4	0	4	4	4	0	0	0	4	4	4	4	4	4	4	4	0	4	0	0	0	4	4	4	4	4	4	4	4	0	4	0	4	4	4	4	4	4	0	0	0	4	0	4
P04626	ERBB2	Receptor tyrosine-protein kinase erbB-2	ERBB2_HUMAN	4.03e-10	0	2	0	2	2	2	2	0	0	2	2	2	2	0	2	2	0	2	2	2	2	2	2	2	2	2	2	2	2	2	2	0	0	2	2	2	2	2	2	2	0	2	2	2	2
P04632	CAPNS1	Calpain small subunit 1	CPNS1_HUMAN	2.99e-16	4	4	4	4	4	4	4	0	0	4	4	4	4	4	4	4	4	4	4	0	0	4	4	4	4	4	4	4	4	4	0	4	0	4	4	4	4	4	4	4	4	4	4	4	4
P04733	MT1F	Metallothionein-1F	MT1F_HUMAN	1.63e-09	0	0	0	0	2	0	2	2	2	2	2	2	0	2	2	2	2	2	2	2	2	2	2	2	2	0	2	2	2	2	2	2	0	2	2	2	2	0	2	0	0	2	2	0	0
P04745	AMY1A	Alpha-amylase 1	AMY1_HUMAN	2.3e-28	33	33	33	33	33	33	33	33	33	33	33	33	33	33	33	33	33	33	33	33	33	33	33	33	33	33	33	33	33	33	33	33	33	33	33	33	33	33	33	33	33	33	33	33	33
P04746	AMY2A	Pancreatic alpha-amylase	AMYP_HUMAN	7.13e-23	3	3	3	3	3	3	3	3	3	3	3	3	3	3	3	3	3	3	3	3	3	3	3	3	3	3	3	3	3	3	3	3	3	3	3	3	3	3	3	3	3	3	3	3	3
P04792	HSPB1	Heat shock protein beta-1	HSPB1_HUMAN	8.8e-23	19	19	19	19	19	19	19	19	19	19	19	19	19	19	19	19	19	19	19	19	19	19	19	19	19	19	19	19	19	19	19	19	19	19	19	19	19	19	19	19	19	19	19	19	19
P04839	CYBB	Cytochrome b-245 heavy chain	CY24B_HUMAN	1.66e-09	3	3	0	3	3	0	0	0	0	3	3	0	3	3	3	0	0	0	3	0	0	3	3	3	3	3	3	3	3	0	3	0	0	3	3	3	0	3	0	0	0	3	3	0	0
P04843	RPN1	Dolichyl-diphosphooligosaccharide--protein glycosyltransferase subunit 1	RPN1_HUMAN	1.49e-09	8	8	8	8	0	8	0	0	0	8	8	8	8	8	8	8	8	8	8	8	0	8	8	8	8	8	8	8	8	8	8	8	0	8	8	8	8	8	8	8	8	8	8	8	8
P04844	RPN2	Dolichyl-diphosphooligosaccharide--protein glycosyltransferase subunit 2	RPN2_HUMAN	1.11e-11	8	8	0	8	8	0	0	0	0	8	8	8	8	8	8	0	0	0	8	0	0	0	8	8	8	8	8	8	8	8	8	8	0	8	8	8	8	8	8	8	8	0	8	0	8
P04899	GNAI2	Guanine nucleotide-binding protein G(i) subunit alpha-2	GNAI2_HUMAN	1.55e-20	8	8	8	8	8	8	8	8	8	8	8	8	8	8	8	8	8	8	8	0	0	8	8	8	8	8	8	8	8	8	8	8	0	8	8	8	8	8	8	8	8	8	8	8	8
P05023	ATP1A1	Sodium/potassium-transporting ATPase subunit alpha-1	AT1A1_HUMAN	6.11e-24	21	21	21	21	21	21	0	0	0	21	21	21	21	21	21	21	21	21	21	21	21	21	21	21	21	21	21	21	21	21	21	21	21	21	21	21	21	21	21	21	21	21	21	21	21
P05026	ATP1B1	Sodium/potassium-transporting ATPase subunit beta-1	AT1B1_HUMAN	5.98e-29	6	6	6	6	6	6	6	6	6	6	6	6	6	6	6	6	6	6	6	6	0	6	6	6	6	6	6	6	6	6	6	6	6	6	6	6	6	6	6	6	6	6	6	6	6
P05060	CHGB	Secretogranin-1	SCG1_HUMAN	1.59e-23	10	10	10	10	10	10	10	10	10	10	10	10	10	10	10	10	10	10	10	10	10	10	10	10	10	10	10	10	10	10	10	10	10	10	10	10	10	10	10	10	10	10	10	10	10
P05062	ALDOB	Fructose-bisphosphate aldolase B	ALDOB_HUMAN	7.37e-27	19	19	19	19	19	19	19	19	19	19	19	19	19	19	19	19	19	19	19	19	19	19	19	19	19	19	19	19	19	19	19	19	19	19	19	19	19	19	19	19	19	19	19	19	19
P05067	APP	Amyloid-beta precursor protein	A4_HUMAN	4.25e-18	19	19	19	19	19	19	19	19	19	19	19	19	19	19	19	19	19	19	19	19	19	19	19	19	19	19	19	19	19	19	19	19	19	19	19	19	19	19	19	19	19	19	19	19	19
P05089	ARG1	Arginase-1	ARGI1_HUMAN	8.99e-17	9	9	9	9	9	9	9	9	9	9	9	9	9	9	9	9	9	9	9	9	9	9	9	9	9	9	9	9	9	9	9	9	9	9	9	9	9	9	9	9	9	9	9	9	9
P05090	APOD	Apolipoprotein D	APOD_HUMAN	2.15e-21	14	14	14	14	14	14	14	14	14	14	14	14	14	14	14	14	14	14	14	14	14	14	14	14	14	14	14	14	14	14	14	14	14	14	14	14	14	14	14	14	14	14	14	14	14
P05091	ALDH2	Aldehyde dehydrogenase, mitochondrial	ALDH2_HUMAN	2.23e-10	3	3	3	3	3	3	3	3	3	3	3	3	3	3	3	3	3	3	3	3	3	3	3	3	3	3	3	3	3	3	3	3	0	3	3	3	0	3	3	3	3	3	3	3	3
P05107	ITGB2	Integrin beta-2	ITB2_HUMAN	5.06e-13	3	0	3	3	3	3	3	3	3	3	3	3	3	3	3	0	0	0	3	3	3	3	3	3	3	3	3	3	3	3	0	3	0	3	3	0	0	0	0	0	0	0	3	0	0
P05109	S100A8	Protein S100-A8	S10A8_HUMAN	2.19e-22	11	11	11	11	11	11	11	11	11	11	11	11	11	11	11	11	11	11	11	11	11	11	11	11	11	11	11	11	11	11	11	11	11	11	11	11	11	11	11	11	11	11	11	11	11
P05120	SERPINB2	Plasminogen activator inhibitor 2	PAI2_HUMAN	3.71e-16	0	10	10	10	10	10	10	10	10	10	10	10	10	10	10	10	10	10	10	0	0	10	10	10	10	10	10	10	10	10	10	10	0	10	10	10	10	0	0	10	0	10	10	0	0
P05141	SLC25A5	ADP/ATP translocase 2	ADT2_HUMAN	3.33e-21	11	11	11	11	11	11	0	0	0	11	11	11	11	11	11	11	11	0	11	0	0	11	11	11	11	11	11	11	11	11	11	11	0	11	11	11	11	11	11	11	11	11	11	11	11
P05154	SERPINA5	Plasma serine protease inhibitor	IPSP_HUMAN	1.35e-20	16	16	16	16	16	16	16	16	16	16	16	16	16	16	16	16	16	16	16	16	16	16	16	16	16	16	16	16	16	16	16	16	16	16	16	16	16	16	16	16	16	16	16	16	16
P05155	SERPING1	Plasma protease C1 inhibitor	IC1_HUMAN	8.91e-20	22	22	22	22	22	22	22	22	22	22	22	22	22	22	22	22	22	22	22	22	22	22	22	22	22	22	22	22	22	22	22	22	22	22	22	22	22	22	22	22	22	22	22	22	22
P05156	CFI	Complement factor I	CFAI_HUMAN	3.1e-26	26	26	26	26	26	26	26	26	26	26	26	26	26	26	26	26	26	26	26	26	26	26	26	26	26	26	26	26	26	26	26	26	26	26	26	26	26	26	26	26	26	26	26	26	26
P05160	F13B	Coagulation factor XIII B chain	F13B_HUMAN	8.98e-12	5	5	0	5	5	5	5	5	5	5	5	5	5	5	5	5	5	5	5	5	0	5	5	5	5	5	5	5	5	5	5	5	0	5	5	5	5	5	5	5	5	5	5	5	5
P05161	ISG15	Ubiquitin-like protein ISG15	ISG15_HUMAN	1.6e-20	0	4	0	0	4	0	0	0	0	0	0	0	4	4	4	0	0	0	0	0	0	4	4	4	4	4	4	4	4	4	0	0	0	0	0	0	0	4	0	0	0	0	4	0	0
P05164	MPO	Myeloperoxidase	PERM_HUMAN	1.7e-23	38	38	38	38	38	38	38	38	38	38	38	38	38	38	38	38	38	38	38	38	38	38	38	38	38	38	38	38	38	38	38	38	38	38	38	38	38	38	38	38	38	38	38	38	38
P05186	ALPL	Alkaline phosphatase, tissue-nonspecific isozyme	PPBT_HUMAN	3.44e-08	2	2	0	2	0	0	2	2	0	2	2	2	2	0	2	2	2	2	2	0	2	2	2	2	2	2	2	2	2	0	2	2	0	2	2	2	2	2	0	0	0	0	2	0	0
P05198	EIF2S1	Eukaryotic translation initiation factor 2 subunit 1	IF2A_HUMAN	4.66e-17	0	7	7	7	7	7	0	0	0	7	7	7	7	7	7	7	0	7	7	0	7	7	7	7	7	7	7	7	7	7	7	7	0	7	7	7	7	7	0	7	0	0	7	0	0
P05204;Q15651	HMGN2;HMGN3	Non-histone chromosomal protein HMG-17;High mobility group nucleosome-binding domain-containing protein 3	HMGN2_HUMAN;HMGN3_HUMAN	2.38e-22	2	2	2	2	0	0	2	2	2	2	2	2	2	2	2	2	2	2	2	0	0	2	0	2	2	2	2	2	0	2	2	2	2	2	2	2	2	0	2	2	2	2	2	2	2
P05362	ICAM1	Intercellular adhesion molecule 1	ICAM1_HUMAN	1.42e-23	16	16	16	16	16	16	16	16	16	16	16	16	16	16	16	16	16	16	16	16	16	16	16	16	16	16	16	16	16	16	16	16	16	16	16	16	16	16	16	16	16	16	16	16	16
P05387	RPLP2	60S acidic ribosomal protein P2	RLA2_HUMAN	1.6e-23	5	5	5	5	5	5	5	5	5	5	5	5	5	5	5	5	5	5	5	5	5	5	5	5	5	5	5	5	5	5	5	5	0	5	5	5	5	5	0	5	5	5	5	5	5
P05388	RPLP0	60S acidic ribosomal protein P0	RLA0_HUMAN	2.25e-14	9	9	0	9	9	9	0	0	0	9	9	9	9	9	9	9	9	0	9	0	0	9	9	9	9	9	9	9	9	9	9	9	0	9	9	9	9	9	9	9	9	9	9	9	9
P05413	FABP3	Fatty acid-binding protein, heart	FABPH_HUMAN	7.45e-25	11	11	11	11	11	11	11	11	11	11	11	11	11	11	11	11	11	11	11	11	11	11	11	11	11	11	11	11	11	11	11	11	11	11	11	11	11	11	11	11	11	11	11	11	11
P05451	REG1A	Lithostathine-1-alpha	REG1A_HUMAN	1.94e-16	10	10	10	10	10	10	10	10	10	10	10	10	10	10	10	10	10	10	10	10	10	10	10	10	10	10	10	10	10	10	10	10	10	10	10	10	10	10	10	10	10	10	10	10	10
P05452	CLEC3B	Tetranectin	TETN_HUMAN	2.74e-23	13	13	13	13	13	13	13	13	13	13	13	13	13	13	13	13	13	13	13	13	13	13	13	13	13	13	13	13	13	13	13	13	13	13	13	13	13	13	13	13	13	13	13	13	13
P05534	HLA-A	HLA class I histocompatibility antigen, A-24 alpha chain	1A24_HUMAN	1.37e-16	2	0	0	2	2	2	0	0	0	2	2	2	2	2	2	2	2	2	2	0	0	0	2	0	2	2	0	2	0	0	0	0	0	2	0	2	2	2	2	2	0	0	2	0	0
P05543	SERPINA7	Thyroxine-binding globulin	THBG_HUMAN	4.87e-22	19	19	19	19	19	19	19	19	19	19	19	19	19	19	19	19	19	19	19	19	0	19	19	19	19	19	19	19	19	19	19	19	19	19	19	19	19	19	19	19	19	19	19	19	19
P05546	SERPIND1	Heparin cofactor 2	HEP2_HUMAN	7.84e-21	11	11	11	11	11	11	11	11	11	11	11	11	11	11	11	11	11	11	11	11	11	11	11	11	11	11	11	11	11	11	11	11	11	11	11	11	11	11	11	11	11	11	11	11	11
P05556	ITGB1	Integrin beta-1	ITB1_HUMAN	2.45e-27	15	15	15	15	15	15	15	15	15	15	15	15	15	15	15	15	15	15	15	15	15	15	15	15	15	15	15	15	15	15	15	15	15	15	15	15	15	15	15	15	15	15	15	15	15
P05783	KRT18	Keratin, type I cytoskeletal 18	K1C18_HUMAN	6.09e-18	12	12	12	12	12	12	0	0	12	12	12	12	12	12	12	12	12	12	12	0	0	12	12	12	12	12	12	12	12	12	12	12	0	12	12	12	12	12	12	12	12	12	12	12	12
P05787	KRT8	Keratin, type II cytoskeletal 8	K2C8_HUMAN	6.36e-28	22	22	22	22	22	22	22	22	22	22	22	22	22	22	22	22	22	22	22	22	22	22	22	22	22	22	22	22	22	22	22	22	22	22	22	22	22	22	22	22	22	22	22	22	22
P05937	CALB1	Calbindin	CALB1_HUMAN	1.08e-20	19	19	19	19	19	19	19	19	19	19	19	19	19	19	19	19	19	19	19	0	0	19	19	19	19	19	19	19	19	19	19	19	19	19	19	19	19	19	19	19	19	19	19	19	19
P05976	MYL1	Myosin light chain 1/3, skeletal muscle isoform	MYL1_HUMAN	4.26e-09	0	0	0	0	0	0	0	0	0	0	2	0	0	0	0	0	0	0	0	0	0	0	0	0	2	2	2	0	0	0	0	0	0	0	0	2	2	0	0	0	0	0	0	0	0
P05981	HPN	Serine protease hepsin	HEPS_HUMAN	3.9e-24	6	6	6	6	6	6	6	6	6	6	6	6	6	6	6	6	6	6	6	0	6	6	6	6	6	6	6	6	6	6	6	6	0	6	6	6	6	6	6	6	6	6	6	6	6
P06132	UROD	Uroporphyrinogen decarboxylase	DCUP_HUMAN	1.13e-11	2	2	2	2	2	2	0	0	0	2	2	2	2	2	2	2	2	0	2	0	0	2	2	2	2	2	2	2	2	2	0	0	0	2	2	2	2	2	2	0	0	0	2	0	0
P06280	GLA	Alpha-galactosidase A	AGAL_HUMAN	4.54e-25	16	16	16	16	16	16	16	16	16	16	16	16	16	16	16	16	16	16	16	16	16	16	16	16	16	16	16	16	16	16	16	16	16	16	16	16	16	16	16	16	16	16	16	16	16
P06312	IGKV4-1	Immunoglobulin kappa variable 4-1	KV401_HUMAN	5.84e-28	4	4	4	4	4	4	4	4	4	4	4	4	4	4	4	4	4	4	4	0	0	4	4	4	4	4	4	4	4	4	4	4	4	4	4	4	4	4	4	4	4	4	4	4	4
P06396	GSN	Gelsolin	GELS_HUMAN	1.64e-25	42	42	42	42	42	42	42	42	42	42	42	42	42	42	42	42	42	42	42	42	42	42	42	42	42	42	42	42	42	42	42	42	42	42	42	42	42	42	42	42	42	42	42	42	42
P06454	PTMA	Prothymosin alpha	PTMA_HUMAN	7.53e-12	2	2	2	2	2	2	2	2	2	2	2	2	2	2	2	2	2	2	2	2	2	2	2	2	2	2	2	2	2	2	2	2	2	2	2	2	2	2	2	2	2	2	2	2	2
P06576	ATP5F1B	ATP synthase subunit beta, mitochondrial	ATPB_HUMAN	5.98e-29	14	14	14	14	14	14	0	0	0	14	14	14	14	14	14	14	14	14	14	0	0	14	14	14	14	14	14	14	14	14	14	14	0	14	14	14	14	14	14	14	14	14	14	14	14
P06681	C2	Complement C2	CO2_HUMAN	2.31e-17	0	0	0	11	11	11	11	11	11	11	11	11	11	11	11	0	11	11	11	11	11	11	11	11	11	11	11	11	11	11	11	11	0	11	11	11	11	11	11	11	11	11	11	11	11
P06702	S100A9	Protein S100-A9	S10A9_HUMAN	7.76e-23	13	13	13	13	13	13	13	13	13	13	13	13	13	13	13	13	13	13	13	13	13	13	13	13	13	13	13	13	13	13	13	13	13	13	13	13	13	13	13	13	13	13	13	13	13
P06703	S100A6	Protein S100-A6	S10A6_HUMAN	8.09e-09	2	2	2	2	2	2	2	2	2	2	2	2	2	2	2	2	2	2	2	2	2	2	2	2	2	2	2	2	2	2	2	2	2	2	2	2	2	2	2	2	2	2	2	2	2
P06727	APOA4	Apolipoprotein A-IV	APOA4_HUMAN	5.17e-24	26	26	26	26	26	26	26	26	26	26	26	26	26	26	26	26	26	26	26	26	26	26	26	26	26	26	26	26	26	26	26	26	26	26	26	26	26	26	26	26	26	26	26	26	26
P06731	CEACAM5	Carcinoembryonic antigen-related cell adhesion molecule 5	CEAM5_HUMAN	2.84e-24	9	9	9	9	9	9	9	9	9	9	9	9	9	9	9	9	9	9	9	9	9	9	9	9	9	9	9	9	9	9	9	9	9	9	9	9	9	9	9	9	9	9	9	9	9
P06733	ENO1	Alpha-enolase	ENOA_HUMAN	5.98e-29	31	31	31	31	31	31	31	31	31	31	31	31	31	31	31	31	31	31	31	31	31	31	31	31	31	31	31	31	31	31	31	31	31	31	31	31	31	31	31	31	31	31	31	31	31
P06734	FCER2	Low affinity immunoglobulin epsilon Fc receptor	FCER2_HUMAN	2.54e-12	8	8	8	8	8	8	8	8	8	8	8	8	8	8	8	8	8	8	8	8	8	8	8	8	8	8	8	8	8	8	8	8	8	8	8	8	8	8	8	8	8	8	8	8	8
P06737	PYGL	Glycogen phosphorylase, liver form	PYGL_HUMAN	7.42e-22	0	7	7	0	0	0	0	0	0	7	7	7	7	7	7	7	0	0	0	0	0	0	0	0	7	7	7	7	7	7	0	0	0	7	7	7	0	0	0	0	0	0	7	0	0
P06744	GPI	Glucose-6-phosphate isomerase	G6PI_HUMAN	1.3e-24	16	16	16	16	16	16	16	0	0	16	16	16	16	16	16	16	16	16	16	0	16	16	16	16	16	16	16	16	16	16	16	16	0	16	16	16	16	16	16	16	16	16	16	16	16
P06748	NPM1	Nucleophosmin	NPM_HUMAN	5.98e-29	5	5	5	5	5	5	5	5	0	5	5	5	5	5	5	0	5	0	5	5	5	0	5	5	5	5	5	5	5	5	0	5	0	5	5	5	5	0	5	0	0	0	5	0	0
P06753	TPM3	Tropomyosin alpha-3 chain	TPM3_HUMAN	1.73e-17	4	4	4	4	4	4	4	4	4	4	4	4	4	4	4	4	4	4	4	4	4	4	4	4	4	4	4	4	4	4	4	4	0	4	4	4	4	4	4	4	0	4	4	4	0
P06756	ITGAV	Integrin alpha-V	ITAV_HUMAN	2.36e-06	4	0	0	0	0	0	0	0	0	4	4	4	4	4	4	4	4	4	0	0	0	4	4	0	4	4	4	4	4	4	4	4	0	4	4	4	4	4	4	4	0	4	4	4	4
P06858	LPL	Lipoprotein lipase	LIPL_HUMAN	2.08e-22	4	4	4	4	0	0	0	0	0	4	4	4	4	4	4	4	4	4	4	0	4	0	4	0	4	4	4	0	0	0	4	0	0	4	4	4	4	4	4	4	4	4	4	4	4
P06865	HEXA	Beta-hexosaminidase subunit alpha	HEXA_HUMAN	1.08e-26	18	18	18	18	18	18	18	18	18	18	18	18	18	18	18	18	18	18	18	18	18	18	18	18	18	18	18	18	18	18	18	18	18	18	18	18	18	18	18	18	18	18	18	18	18
P06870	KLK1	Kallikrein-1	KLK1_HUMAN	1.77e-20	7	7	7	7	7	7	7	7	7	7	7	7	7	7	7	7	7	7	7	7	7	7	7	7	7	7	7	7	7	7	7	7	7	7	7	7	7	7	7	7	7	7	7	7	7
P06899;P23527;P33778;Q16778	HIST1H2BJ;HIST1H2BO;HIST1H2BB;HIST2H2BE	Histone H2B type 1-J;Histone H2B type 1-O;Histone H2B type 1-B;Histone H2B type 2-E	H2B1J_HUMAN;H2B1O_HUMAN;H2B1B_HUMAN;H2B2E_HUMAN	5.4e-27	6	6	6	6	6	6	6	6	6	6	6	6	6	6	6	6	6	6	6	6	6	6	6	6	6	6	6	6	6	6	6	6	6	6	6	6	6	6	6	6	6	6	6	6	6
P07099	EPHX1	Epoxide hydrolase 1	HYEP_HUMAN	2.54e-13	7	7	7	7	7	7	0	0	0	7	7	7	7	7	7	7	7	0	7	0	0	7	7	7	7	7	7	7	7	7	7	7	0	7	7	7	7	7	7	7	0	0	7	0	7
P07108	DBI	Acyl-CoA-binding protein	ACBP_HUMAN	3.82e-19	9	9	9	9	9	9	9	9	9	9	9	9	9	9	9	9	9	9	9	9	9	9	9	9	9	9	9	9	9	9	9	9	9	9	9	9	9	9	9	9	9	9	9	9	9
P07148	FABP1	Fatty acid-binding protein, liver	FABPL_HUMAN	1.84e-16	6	6	6	6	6	6	6	6	6	6	6	6	6	6	6	6	6	6	6	6	6	6	6	6	6	6	6	6	6	6	6	6	6	6	6	6	6	6	6	6	6	6	6	6	6
P07195	LDHB	L-lactate dehydrogenase B chain	LDHB_HUMAN	2.73e-21	17	17	17	17	17	17	17	17	17	17	17	17	17	17	17	17	17	17	17	17	17	17	17	17	17	17	17	17	17	17	17	17	17	17	17	17	17	17	17	17	17	17	17	17	17
P07203	GPX1	Glutathione peroxidase 1	GPX1_HUMAN	6.52e-12	5	5	5	5	5	5	0	0	0	5	5	5	5	5	5	5	5	0	5	0	0	5	5	5	5	5	5	5	5	5	5	0	0	5	5	5	5	5	5	5	0	0	5	0	0
P07204	THBD	Thrombomodulin	TRBM_HUMAN	6.5e-25	9	9	9	9	9	9	9	9	9	9	9	9	9	9	9	9	9	9	9	9	9	9	9	9	9	9	9	9	9	9	9	9	9	9	9	9	9	9	9	9	9	9	9	9	9
P07205	PGK2	Phosphoglycerate kinase 2	PGK2_HUMAN	5.08e-23	0	0	0	0	0	0	0	0	0	0	0	0	0	0	0	0	0	0	0	0	0	0	0	0	0	0	0	3	0	0	0	0	0	0	0	0	0	0	0	3	3	3	0	3	3
P07225	PROS1	Vitamin K-dependent protein S	PROS_HUMAN	2.19e-22	3	3	3	3	3	3	3	3	3	3	3	3	3	3	3	3	3	0	3	0	0	3	3	3	3	3	3	3	3	3	3	0	0	3	3	3	3	3	3	3	3	3	3	3	3
P07237	P4HB	Protein disulfide-isomerase	PDIA1_HUMAN	7.99e-27	29	29	29	29	29	29	29	29	29	29	29	29	29	29	29	29	29	29	29	29	29	29	29	29	29	29	29	29	29	29	29	29	0	29	29	29	29	29	29	29	29	29	29	29	29
P07288	KLK3	Prostate-specific antigen	KLK3_HUMAN	1.27e-18	0	7	7	0	7	7	0	7	7	7	7	7	7	7	7	7	7	7	7	0	0	7	7	7	7	7	7	7	7	7	7	7	0	7	7	7	7	7	7	7	7	7	7	7	7
P07305	H1F0	Histone H1.0	H10_HUMAN	1.63e-16	5	5	5	5	0	5	0	5	5	5	5	5	5	5	5	5	5	5	5	5	5	5	5	5	5	5	5	5	5	5	5	5	5	5	5	5	5	5	5	5	5	5	5	5	5
P07306	ASGR1	Asialoglycoprotein receptor 1	ASGR1_HUMAN	3.34e-16	3	0	0	3	3	0	3	3	3	3	3	3	3	3	3	3	3	3	3	3	3	3	3	3	3	3	3	3	3	3	3	3	3	3	3	3	3	3	3	3	3	3	3	3	3
P07307	ASGR2	Asialoglycoprotein receptor 2	ASGR2_HUMAN	3.31e-20	8	8	8	8	8	8	8	8	8	8	8	8	8	8	8	8	8	8	8	8	8	8	8	8	8	8	8	8	8	8	8	8	8	8	8	8	8	8	8	8	8	8	8	8	8
P07311	ACYP1	Acylphosphatase-1	ACYP1_HUMAN	1.18e-12	3	3	3	3	0	0	3	3	0	0	3	3	3	3	3	0	0	0	3	3	0	0	0	3	3	3	3	3	3	3	3	3	0	3	0	3	0	0	0	3	3	3	3	3	3
P07333	CSF1R	Macrophage colony-stimulating factor 1 receptor	CSF1R_HUMAN	5.91e-24	4	4	4	4	4	4	4	4	4	4	4	4	4	4	4	4	4	4	4	0	0	4	4	4	4	4	4	4	4	4	4	4	0	4	4	4	4	4	4	4	4	4	4	4	4
P07339	CTSD	Cathepsin D	CATD_HUMAN	5.98e-29	23	23	23	23	23	23	23	23	23	23	23	23	23	23	23	23	23	23	23	23	23	23	23	23	23	23	23	23	23	23	23	23	23	23	23	23	23	23	23	23	23	23	23	23	23
P07355	ANXA2	Annexin A2	ANXA2_HUMAN	2.08e-27	30	30	30	30	30	30	30	30	30	30	30	30	30	30	30	30	30	30	30	30	30	30	30	30	30	30	30	30	30	30	30	30	30	30	30	30	30	30	30	30	30	30	30	30	30
P07357	C8A	Complement component C8 alpha chain	CO8A_HUMAN	5.23e-12	8	0	8	8	8	8	0	0	0	8	8	8	8	8	8	8	8	8	8	0	0	8	8	8	8	8	8	8	8	8	0	0	0	8	8	8	8	0	8	8	0	0	8	0	8
P07358	C8B	Complement component C8 beta chain	CO8B_HUMAN	7.34e-13	8	8	8	8	8	0	8	8	8	8	8	8	8	8	8	8	8	8	8	8	8	8	8	8	8	8	8	8	8	8	8	8	8	8	8	8	8	8	8	8	8	8	8	8	8
P07359	GP1BA	Platelet glycoprotein Ib alpha chain	GP1BA_HUMAN	1.07e-23	4	4	4	4	4	4	4	4	4	4	4	4	4	4	4	4	4	4	4	4	4	4	4	4	4	4	4	4	4	4	4	4	4	4	4	4	4	4	4	4	4	4	4	4	4
P07360	C8G	Complement component C8 gamma chain	CO8G_HUMAN	1.36e-15	7	7	7	7	7	7	0	7	0	7	7	7	7	7	7	7	7	7	7	7	0	7	7	7	7	7	7	7	7	7	7	7	0	7	7	7	7	7	7	7	7	7	7	7	7
P07384	CAPN1	Calpain-1 catalytic subunit	CAN1_HUMAN	1.27e-22	27	27	27	27	27	27	27	27	0	27	27	27	27	27	27	27	27	27	27	27	27	27	27	27	27	27	27	27	27	27	27	27	0	27	27	27	27	27	27	27	27	27	27	27	27
P07437	TUBB	Tubulin beta chain	TBB5_HUMAN	2.06e-19	3	3	3	3	3	3	0	0	0	3	3	3	3	3	3	3	3	3	3	0	0	3	3	3	3	3	3	3	3	3	3	3	0	3	3	3	3	3	3	3	3	3	3	3	3
P07476	IVL	Involucrin	INVO_HUMAN	1.59e-27	34	34	34	34	34	34	34	34	34	34	34	34	34	34	34	34	34	34	34	34	34	34	34	34	34	34	34	34	34	34	34	34	34	34	34	34	34	34	34	34	34	34	34	34	34
P07477	PRSS1	Trypsin-1	TRY1_HUMAN	6.51e-12	0	0	0	0	0	0	0	2	0	0	2	0	0	2	2	2	2	2	0	2	2	0	0	0	0	0	0	0	0	2	0	0	0	2	0	0	2	2	0	2	2	2	0	2	2
P07478	PRSS2	Trypsin-2	TRY2_HUMAN	2.52e-18	3	3	3	3	3	3	3	3	3	3	3	3	3	3	3	3	3	3	3	3	3	3	3	3	3	3	3	3	3	3	3	3	3	3	3	3	3	3	3	3	3	3	3	3	3
P07585	DCN	Decorin	PGS2_HUMAN	1.7e-21	4	4	4	4	4	4	4	4	4	4	4	4	4	4	4	4	4	4	4	4	4	4	4	4	4	4	4	4	4	4	4	4	4	4	4	4	4	4	4	4	4	4	4	4	4
P07602	PSAP	Prosaposin	SAP_HUMAN	2.02e-23	29	29	29	29	29	29	29	29	29	29	29	29	29	29	29	29	29	29	29	29	29	29	29	29	29	29	29	29	29	29	29	29	29	29	29	29	29	29	29	29	29	29	29	29	29
P07686	HEXB	Beta-hexosaminidase subunit beta	HEXB_HUMAN	3.58e-28	23	23	23	23	23	23	23	23	23	23	23	23	23	23	23	23	23	23	23	23	0	23	23	23	23	23	23	23	23	23	23	23	23	23	23	23	23	23	23	23	23	23	23	23	23
P07711	CTSL	Cathepsin L1	CATL1_HUMAN	1.16e-22	10	10	10	10	10	10	10	10	10	10	10	10	10	10	10	10	10	10	10	10	10	10	10	10	10	10	10	10	10	10	10	10	10	10	10	10	10	10	10	10	10	10	10	10	10
P07737	PFN1	Profilin-1	PROF1_HUMAN	1.93e-22	12	12	12	12	12	12	12	12	12	12	12	12	12	12	12	12	12	12	12	12	12	12	12	12	12	12	12	12	12	12	12	12	12	12	12	12	12	12	12	12	12	12	12	12	12
P07738	BPGM	Bisphosphoglycerate mutase	PMGE_HUMAN	4e-24	13	13	13	13	13	13	0	0	0	13	13	13	13	13	13	13	13	13	13	13	0	13	13	0	13	13	13	13	13	13	13	13	13	13	13	13	13	13	13	13	13	0	13	13	0
P07741	APRT	Adenine phosphoribosyltransferase	APT_HUMAN	1.44e-15	4	4	4	4	4	4	0	4	4	4	4	4	4	4	4	4	4	4	4	0	0	4	4	4	4	4	4	4	4	4	4	4	0	4	4	4	4	4	4	4	4	4	4	4	4
P07814	EPRS	Bifunctional glutamate/proline--tRNA ligase	SYEP_HUMAN	1.74e-06	0	0	0	0	0	0	0	0	0	0	0	0	2	2	2	0	0	0	0	0	0	0	0	0	0	0	2	2	2	0	0	0	0	0	0	0	0	2	0	0	0	2	2	0	0
P07858	CTSB	Cathepsin B	CATB_HUMAN	7.05e-27	21	21	21	21	21	21	21	21	21	21	21	21	21	21	21	21	21	21	21	21	21	21	21	21	21	21	21	21	21	21	21	21	21	21	21	21	21	21	21	21	21	21	21	21	21
P07864	LDHC	L-lactate dehydrogenase C chain	LDHC_HUMAN	6.84e-19	0	7	0	0	0	0	0	0	0	7	0	0	7	7	7	0	0	0	0	0	0	0	0	0	0	7	0	0	0	0	0	0	0	0	0	0	0	0	0	7	7	7	0	7	7
P07900	HSP90AA1	Heat shock protein HSP 90-alpha	HS90A_HUMAN	5.26e-22	16	16	16	16	16	16	0	0	0	16	16	16	16	16	16	16	16	16	16	0	0	16	16	16	16	16	16	16	16	16	16	16	0	16	16	16	16	16	16	16	16	16	16	16	16
P07910	HNRNPC	Heterogeneous nuclear ribonucleoproteins C1/C2	HNRPC_HUMAN	8.57e-17	5	5	5	5	5	5	0	0	0	5	5	5	5	5	5	0	5	0	5	0	0	5	5	5	5	5	5	5	5	5	5	0	0	5	5	5	5	5	5	5	0	5	5	5	5
P07911	UMOD	Uromodulin	UROM_HUMAN	1.65e-22	41	41	41	41	41	41	41	41	41	41	41	41	41	41	41	41	41	41	41	41	41	41	41	41	41	41	41	41	41	41	41	41	41	41	41	41	41	41	41	41	41	41	41	41	41
P07942	LAMB1	Laminin subunit beta-1	LAMB1_HUMAN	6.44e-24	17	17	17	17	17	17	17	17	17	17	17	17	17	17	17	17	17	17	17	17	17	17	17	17	17	17	17	17	17	17	17	17	17	17	17	17	17	17	17	17	17	17	17	17	17
P07947	YES1	Tyrosine-protein kinase Yes	YES_HUMAN	3.03e-14	2	0	2	0	0	0	0	0	0	2	2	2	2	2	2	2	2	2	2	0	0	0	0	0	2	2	2	2	2	2	2	2	0	0	0	2	2	2	2	0	0	0	0	0	0
P07996	THBS1	Thrombospondin-1	TSP1_HUMAN	2.56e-24	27	27	27	27	27	27	27	27	27	27	27	27	27	27	27	27	27	27	27	27	27	27	27	27	27	27	27	27	27	27	27	27	27	27	27	27	27	27	27	27	27	27	27	27	27
P07998	RNASE1	Ribonuclease pancreatic	RNAS1_HUMAN	1.48e-20	6	6	6	6	6	6	6	6	6	6	6	6	6	6	6	6	6	6	6	6	6	6	6	6	6	6	6	6	6	6	6	6	6	6	6	6	6	6	6	6	6	6	6	6	6
P08069	IGF1R	Insulin-like growth factor 1 receptor	IGF1R_HUMAN	4.73e-05	2	0	2	2	2	2	2	2	2	2	2	2	2	0	2	0	2	2	2	2	2	2	2	2	2	2	2	2	2	2	2	2	0	2	0	2	2	0	2	2	0	2	2	0	2
P08123	COL1A2	Collagen alpha-2(I) chain	CO1A2_HUMAN	1.15e-20	15	15	15	15	15	15	15	15	15	15	15	15	15	15	15	15	15	15	15	15	15	15	15	15	15	15	15	15	15	15	15	15	15	15	15	15	15	15	15	15	15	15	15	15	15
P08133	ANXA6	Annexin A6	ANXA6_HUMAN	1.92e-27	21	21	21	21	21	21	21	21	21	21	21	21	21	21	21	21	21	21	21	21	0	21	21	21	21	21	21	21	21	21	21	21	0	21	21	21	21	21	21	21	21	21	21	21	21
P08138	NGFR	Tumor necrosis factor receptor superfamily member 16	TNR16_HUMAN	1.16e-14	5	5	5	5	5	5	5	5	5	5	5	5	5	5	5	5	5	5	5	5	5	5	5	5	5	5	5	5	5	5	5	5	5	5	5	5	5	5	5	5	5	5	5	5	5
P08174	CD55	Complement decay-accelerating factor	DAF_HUMAN	5.98e-29	23	23	23	23	23	23	23	23	23	23	23	23	23	23	23	23	23	23	23	23	23	23	23	23	23	23	23	23	23	23	23	23	23	23	23	23	23	23	23	23	23	23	23	23	23
P08183	ABCB1	Multidrug resistance protein 1	MDR1_HUMAN	1.79e-23	22	22	22	22	22	22	0	22	0	22	22	22	22	22	22	22	22	22	22	0	0	22	22	22	22	22	22	22	22	22	22	22	22	22	22	22	22	22	22	22	22	22	22	22	22
P08185	SERPINA6	Corticosteroid-binding globulin	CBG_HUMAN	2.6e-19	10	10	10	10	10	10	10	10	10	10	10	10	10	10	10	10	10	10	10	10	10	10	10	10	10	10	10	10	10	10	10	10	10	10	10	10	10	10	10	10	10	10	10	10	10
P08195	SLC3A2	4F2 cell-surface antigen heavy chain	4F2_HUMAN	5.98e-29	15	15	15	15	15	15	0	15	0	15	15	15	15	15	15	15	15	15	15	15	0	15	15	15	15	15	15	15	15	15	15	15	15	15	15	15	15	15	15	15	15	15	15	15	15
P08217	CELA2A	Chymotrypsin-like elastase family member 2A	CEL2A_HUMAN	1.01e-13	0	5	0	5	5	0	5	0	0	0	5	5	5	5	5	5	5	0	5	0	0	0	0	5	5	5	5	5	0	0	0	0	0	0	5	5	0	0	5	5	5	5	5	5	0
P08236	GUSB	Beta-glucuronidase	BGLR_HUMAN	6.62e-19	20	20	20	20	20	20	20	20	20	20	20	20	20	20	20	20	20	20	20	20	0	20	20	20	20	20	20	20	20	20	20	20	20	20	20	20	20	20	20	20	20	20	20	20	20
P08238	HSP90AB1	Heat shock protein HSP 90-beta	HS90B_HUMAN	3.83e-19	25	25	25	25	25	25	25	25	25	25	25	25	25	25	25	25	25	25	25	25	25	25	25	25	25	25	25	25	25	25	25	25	25	25	25	25	25	25	25	25	25	25	25	25	25
P08246	ELANE	Neutrophil elastase	ELNE_HUMAN	4.2e-13	6	6	6	6	6	6	6	6	6	6	6	6	6	6	6	6	6	6	6	0	0	0	6	6	6	6	6	6	6	6	6	6	6	6	6	6	6	6	6	6	6	6	6	6	6
P08253	MMP2	72 kDa type IV collagenase	MMP2_HUMAN	3.62e-20	12	12	12	12	12	12	12	12	12	12	12	12	12	12	12	12	12	12	12	12	12	12	12	12	12	12	12	12	12	12	12	12	12	12	12	12	12	12	12	12	12	12	12	12	12
P08294	SOD3	Extracellular superoxide dismutase [Cu-Zn]	SODE_HUMAN	7.27e-29	11	11	11	11	11	11	11	11	11	11	11	11	11	11	11	11	11	11	11	11	11	11	11	11	11	11	11	11	11	11	11	11	11	11	11	11	11	11	11	11	11	11	11	11	11
P08311	CTSG	Cathepsin G	CATG_HUMAN	1.42e-18	7	7	7	7	7	7	7	7	0	7	7	7	7	7	7	7	7	7	7	7	0	7	7	7	7	7	7	7	7	7	7	7	7	7	7	7	7	7	7	7	0	7	7	7	7
P08397	HMBS	Porphobilinogen deaminase	HEM3_HUMAN	5.07e-25	0	5	0	5	5	5	0	0	0	5	5	5	5	5	5	5	5	0	5	0	0	0	0	5	5	5	5	0	5	5	0	0	0	5	5	5	5	5	0	5	0	0	5	0	0
P08473	MME	Neprilysin	NEP_HUMAN	6.75e-24	28	28	28	28	28	28	28	28	28	28	28	28	28	28	28	28	28	28	28	0	0	28	28	28	28	28	28	28	28	28	28	28	28	28	28	28	28	28	28	28	28	28	28	28	28
P08476	INHBA	Inhibin beta A chain	INHBA_HUMAN	1.33e-06	2	2	2	0	0	0	2	2	2	2	0	2	2	0	2	2	2	0	2	2	2	2	2	2	2	2	2	0	0	0	2	2	0	2	2	2	2	0	0	0	0	2	2	0	2
P08493	MGP	Matrix Gla protein	MGP_HUMAN	8.02e-09	2	2	2	0	2	2	2	2	0	2	2	2	2	2	2	2	2	2	2	0	2	2	2	2	2	2	2	2	2	2	2	2	0	0	0	2	2	2	2	2	0	2	2	0	2
P08519	LPA	Apolipoprotein(a)	APOA_HUMAN	8.72e-24	8	8	8	8	8	8	8	8	8	8	8	8	8	8	8	8	8	8	8	8	8	8	8	8	8	8	8	8	8	8	8	8	8	8	8	8	8	8	8	8	8	8	8	8	8
P08571	CD14	Monocyte differentiation antigen CD14	CD14_HUMAN	5.98e-29	18	18	18	18	18	18	18	18	18	18	18	18	18	18	18	18	18	18	18	18	18	18	18	18	18	18	18	18	18	18	18	18	18	18	18	18	18	18	18	18	18	18	18	18	18
P08572	COL4A2	Collagen alpha-2(IV) chain	CO4A2_HUMAN	1.11e-25	15	15	15	15	15	15	15	15	15	15	15	15	15	15	15	15	15	15	15	15	15	15	15	15	15	15	15	15	15	15	15	15	15	15	15	15	15	15	15	15	15	15	15	15	15
P08581	MET	Hepatocyte growth factor receptor	MET_HUMAN	2.82e-08	0	2	0	2	0	2	0	0	0	2	2	0	0	0	0	0	2	0	2	0	0	0	0	0	2	2	2	2	2	0	0	0	0	2	2	2	2	2	2	0	0	2	0	0	0
P08582	MELTF	Melanotransferrin	TRFM_HUMAN	4.13e-21	31	31	31	31	31	31	31	31	31	31	31	31	31	31	31	31	31	31	31	31	31	31	31	31	31	31	31	31	31	31	31	31	31	31	31	31	31	31	31	31	31	31	31	31	31
P08603	CFH	Complement factor H	CFAH_HUMAN	5.98e-29	47	47	47	47	47	47	47	47	47	47	47	47	47	47	47	47	47	47	47	47	47	47	47	47	47	47	47	47	47	47	47	47	47	47	47	47	47	47	47	47	47	47	47	47	47
P08637	FCGR3A	Low affinity immunoglobulin gamma Fc region receptor III-A	FCG3A_HUMAN	2.82e-21	8	8	8	8	8	8	8	8	8	8	8	8	8	8	8	8	8	8	8	8	8	8	8	8	8	8	8	8	8	8	8	8	8	8	8	8	8	8	8	8	8	8	8	8	8
P08670	VIM	Vimentin	VIME_HUMAN	5.4e-24	31	31	31	31	31	31	31	31	31	31	31	31	31	31	31	31	31	31	31	31	31	31	31	31	31	31	31	31	31	31	31	31	31	31	31	31	31	31	31	31	31	31	31	31	31
P08697	SERPINF2	Alpha-2-antiplasmin	A2AP_HUMAN	4.78e-25	18	18	18	18	18	18	18	18	18	18	18	18	18	18	18	18	18	18	18	18	18	18	18	18	18	18	18	18	18	18	18	18	18	18	18	18	18	18	18	18	18	18	18	18	18
P08708	RPS17	40S ribosomal protein S17	RS17_HUMAN	2.27e-25	2	2	2	0	0	0	0	0	0	0	0	0	2	2	2	2	2	0	2	0	0	0	0	2	2	2	0	2	0	2	0	2	0	2	0	2	0	0	0	0	0	0	0	0	0
P08727	KRT19	Keratin, type I cytoskeletal 19	K1C19_HUMAN	2.89e-26	19	19	19	19	19	19	19	19	19	19	19	19	19	19	19	19	19	19	19	19	19	19	19	19	19	19	19	19	19	19	19	19	19	19	19	19	19	19	19	19	19	19	19	19	19
P08729	KRT7	Keratin, type II cytoskeletal 7	K2C7_HUMAN	3.13e-19	15	15	15	15	15	15	0	0	0	15	15	15	15	15	15	15	15	15	15	15	0	15	15	15	15	15	15	15	15	15	15	15	0	15	15	15	15	15	15	15	15	15	15	15	15
P08754	GNAI3	Guanine nucleotide-binding protein G(k) subunit alpha	GNAI3_HUMAN	2.74e-07	3	3	3	3	0	3	0	0	0	3	3	3	3	3	3	3	3	3	3	0	0	0	3	0	3	3	3	3	3	3	3	0	0	3	3	3	3	3	3	0	0	3	3	3	3
P08758	ANXA5	Annexin A5	ANXA5_HUMAN	2.29e-22	18	18	18	18	18	18	18	18	18	18	18	18	18	18	18	18	18	18	18	18	18	18	18	18	18	18	18	18	18	18	18	18	18	18	18	18	18	18	18	18	18	18	18	18	18
P08779	KRT16	Keratin, type I cytoskeletal 16	K1C16_HUMAN	4.37e-25	20	20	20	20	20	20	20	20	20	20	20	20	20	20	20	20	20	20	20	20	20	20	20	20	20	20	20	20	20	20	20	20	20	20	20	20	20	20	20	20	20	20	20	20	20
P08833	IGFBP1	Insulin-like growth factor-binding protein 1	IBP1_HUMAN	3.22e-13	6	6	6	6	6	6	6	6	6	6	6	6	6	6	6	0	6	6	6	0	0	0	6	6	6	6	6	6	6	6	6	6	6	6	6	6	6	6	6	6	6	6	6	6	6
P08861	CELA3B	Chymotrypsin-like elastase family member 3B	CEL3B_HUMAN	9.95e-14	0	0	0	0	0	0	0	0	0	0	0	5	5	5	5	0	5	0	5	0	0	0	0	0	5	5	5	0	0	5	0	0	0	5	0	5	5	0	5	0	0	0	5	0	0
P08865	RPSA	40S ribosomal protein SA	RSSA_HUMAN	1.2e-24	9	9	9	9	9	9	0	9	0	9	9	9	9	9	9	9	9	9	9	0	0	9	9	9	9	9	9	9	9	9	9	9	0	9	9	9	9	9	9	9	9	9	9	9	9
P08887	IL6R	Interleukin-6 receptor subunit alpha	IL6RA_HUMAN	1.12e-19	7	7	7	7	7	7	7	7	0	7	7	7	7	7	7	7	7	7	7	0	0	7	7	7	7	7	7	7	7	7	7	7	0	7	7	7	7	7	7	7	0	7	7	7	0
P08962	CD63	CD63 antigen	CD63_HUMAN	6.7e-19	2	2	2	2	2	2	2	2	2	2	2	2	2	2	2	2	2	2	2	2	2	2	2	2	2	2	2	2	2	2	2	2	2	2	2	2	2	2	2	2	2	2	2	2	2
P09093	CELA3A	Chymotrypsin-like elastase family member 3A	CEL3A_HUMAN	5.44e-19	9	9	9	9	9	9	0	0	0	9	9	9	9	9	9	9	9	0	9	0	0	9	9	0	9	9	9	9	9	9	9	9	0	9	9	9	0	9	9	0	0	0	9	0	9
P09105	HBQ1	Hemoglobin subunit theta-1	HBAT_HUMAN	2.9e-11	5	0	0	5	0	0	0	0	0	0	0	0	5	0	5	0	0	5	5	0	0	0	0	0	5	5	0	0	5	0	0	5	0	0	0	0	5	0	0	0	5	0	0	0	0
P09110	ACAA1	3-ketoacyl-CoA thiolase, peroxisomal	THIK_HUMAN	1.13e-18	0	0	4	0	0	0	0	0	0	4	4	4	4	4	4	0	0	0	4	0	0	4	4	4	4	4	4	4	4	4	0	0	0	4	4	4	4	4	4	0	0	0	4	0	0
P09172	DBH	Dopamine beta-hydroxylase	DOPO_HUMAN	4.67e-06	0	0	0	2	2	2	0	0	0	0	0	2	0	2	2	2	0	0	0	0	0	0	0	0	2	0	0	0	0	0	0	2	0	0	0	0	0	0	0	0	0	0	0	0	0
P09210	GSTA2	Glutathione S-transferase A2	GSTA2_HUMAN	5.27e-15	9	9	9	9	9	9	9	9	9	9	9	9	9	9	9	9	9	9	9	9	9	9	9	9	9	9	9	9	9	9	9	9	9	9	9	9	9	9	9	9	9	9	9	9	9
P09211	GSTP1	Glutathione S-transferase P	GSTP1_HUMAN	4.57e-22	13	13	13	13	13	13	13	13	13	13	13	13	13	13	13	13	13	13	13	13	13	13	13	13	13	13	13	13	13	13	13	13	13	13	13	13	13	13	13	13	13	13	13	13	13
P09228	CST2	Cystatin-SA	CYTT_HUMAN	3.5e-22	0	3	3	0	0	3	0	0	0	3	3	3	3	3	3	3	3	0	3	0	3	3	3	3	3	3	3	3	3	3	3	3	0	3	3	3	3	3	3	3	3	3	3	3	3
P09237	MMP7	Matrilysin	MMP7_HUMAN	6.68e-24	8	8	8	8	8	8	8	8	8	8	8	8	8	8	8	8	8	8	8	8	8	8	8	8	8	8	8	8	8	8	8	8	8	8	8	8	8	8	8	8	8	8	8	8	8
P09238	MMP10	Stromelysin-2	MMP10_HUMAN	1.16e-09	11	11	0	11	11	11	0	0	0	11	11	0	11	11	11	11	0	11	11	0	0	0	0	11	11	11	11	11	11	0	0	0	0	11	0	11	11	11	11	0	11	11	11	0	0
P09327	VIL1	Villin-1	VILI_HUMAN	2.04e-08	0	6	0	6	6	6	0	0	0	6	6	6	6	6	6	6	6	6	6	6	6	6	6	6	6	6	6	6	6	6	6	6	0	6	6	6	6	6	6	0	0	0	6	0	0
P09382	LGALS1	Galectin-1	LEG1_HUMAN	3.9e-14	4	4	4	4	4	4	0	0	0	4	4	4	4	4	4	0	4	0	4	0	0	4	4	4	4	4	4	4	4	4	4	4	0	4	4	4	4	4	4	4	4	4	4	4	4
P09417	QDPR	Dihydropteridine reductase	DHPR_HUMAN	1.45e-23	10	10	10	10	10	10	10	10	10	10	10	10	10	10	10	10	10	10	10	10	10	10	10	10	10	10	10	10	10	10	10	10	0	10	10	10	10	10	10	10	10	10	10	10	10
P09429	HMGB1	High mobility group protein B1	HMGB1_HUMAN	8.32e-10	0	0	4	0	0	0	0	0	0	4	4	4	4	4	4	4	4	4	4	0	0	0	0	0	4	4	4	4	4	4	4	4	0	4	0	4	4	0	4	4	0	0	4	0	4
P09455	RBP1	Retinol-binding protein 1	RET1_HUMAN	5.95e-06	0	0	0	0	0	0	0	0	0	4	4	0	4	0	4	0	0	0	4	0	0	0	0	0	4	4	4	4	4	4	0	0	0	0	0	0	4	0	0	0	0	0	0	0	0
P09466	PAEP	Glycodelin	PAEP_HUMAN	2.72e-27	0	0	0	6	0	6	6	6	0	6	6	0	6	6	6	0	0	0	6	0	0	0	0	0	6	6	6	6	6	6	0	0	0	6	6	6	0	0	6	6	6	6	6	6	6
P09467	FBP1	Fructose-1,6-bisphosphatase 1	F16P1_HUMAN	6.57e-24	17	17	17	17	17	17	17	17	0	17	17	17	17	17	17	17	17	17	17	17	17	17	17	17	17	17	17	17	17	17	17	17	17	17	17	17	17	17	17	17	17	17	17	17	17
P09486	SPARC	SPARC	SPRC_HUMAN	4.24e-21	8	8	8	8	8	8	8	8	8	8	8	8	8	8	8	8	8	8	8	8	8	8	8	8	8	8	8	8	8	8	8	8	0	8	8	8	8	8	8	8	8	8	8	8	8
P09488	GSTM1	Glutathione S-transferase Mu 1	GSTM1_HUMAN	2.24e-14	0	10	0	0	0	0	0	0	0	10	10	10	10	10	10	10	10	10	10	0	0	10	0	0	10	10	10	10	10	10	10	0	0	10	10	10	10	10	10	10	10	10	10	10	10
P09497	CLTB	Clathrin light chain B	CLCB_HUMAN	2.81e-14	5	5	5	5	5	5	5	5	0	5	5	5	5	5	5	5	5	5	5	0	0	5	5	0	5	5	5	5	5	5	0	5	0	5	5	5	5	5	5	5	0	0	5	5	5
P09525	ANXA4	Annexin A4	ANXA4_HUMAN	1.54e-21	16	16	16	16	16	16	16	16	16	16	16	16	16	16	16	16	16	16	16	16	16	16	16	16	16	16	16	16	16	16	16	16	16	16	16	16	16	16	16	16	16	16	16	16	16
P09529	INHBB	Inhibin beta B chain	INHBB_HUMAN	9.77e-15	3	3	3	0	3	0	3	3	3	3	3	3	3	3	3	3	3	0	3	0	3	3	3	3	3	3	3	3	3	3	3	3	3	3	3	3	3	3	3	3	3	3	3	3	3
P09543	CNP	2',3'-cyclic-nucleotide 3'-phosphodiesterase	CN37_HUMAN	3.45e-19	13	13	13	13	13	13	13	13	0	13	13	13	13	13	13	13	13	13	13	13	0	13	13	13	13	13	13	13	13	13	13	13	0	13	13	13	13	13	13	13	13	13	13	13	13
P09564	CD7	T-cell antigen CD7	CD7_HUMAN	2.75e-25	4	4	4	4	4	4	4	4	4	4	4	4	4	4	4	4	4	4	4	4	4	4	4	4	4	4	4	4	4	4	4	4	4	4	4	4	4	4	4	4	4	4	4	4	4
P09601	HMOX1	Heme oxygenase 1	HMOX1_HUMAN	5.28e-23	8	8	8	8	8	8	0	0	0	8	8	8	8	8	8	0	8	8	8	0	0	0	8	8	8	8	8	8	8	8	0	0	0	8	8	8	0	8	8	0	0	0	8	0	0
P09603	CSF1	Macrophage colony-stimulating factor 1	CSF1_HUMAN	5.98e-29	23	23	23	23	23	23	23	23	23	23	23	23	23	23	23	23	23	23	23	23	23	23	23	23	23	23	23	23	23	23	23	23	23	23	23	23	23	23	23	23	23	23	23	23	23
P09619	PDGFRB	Platelet-derived growth factor receptor beta	PGFRB_HUMAN	1.13e-20	10	10	10	10	10	10	10	10	10	10	10	10	10	10	10	10	10	10	10	10	10	10	10	10	10	10	10	10	10	10	10	10	10	10	10	10	10	10	10	10	10	10	10	10	10
P09622	DLD	Dihydrolipoyl dehydrogenase, mitochondrial	DLDH_HUMAN	2.47e-25	5	5	5	5	5	5	5	0	0	5	5	5	5	5	5	5	5	5	5	5	5	5	5	5	5	5	5	5	5	5	5	5	0	5	5	5	5	5	5	5	5	5	5	5	5
P09651	HNRNPA1	Heterogeneous nuclear ribonucleoprotein A1	ROA1_HUMAN	7.79e-19	6	6	6	6	6	6	0	0	0	6	6	6	6	6	6	6	6	0	6	0	0	6	6	6	6	6	6	6	6	6	0	6	0	6	6	6	6	6	0	6	0	6	6	6	0
P09668	CTSH	Pro-cathepsin H	CATH_HUMAN	3.18e-24	13	13	13	13	13	13	13	13	13	13	13	13	13	13	13	13	13	13	13	13	13	13	13	13	13	13	13	13	13	13	13	13	13	13	13	13	13	13	13	13	13	13	13	13	13
P09669	COX6C	Cytochrome c oxidase subunit 6C	COX6C_HUMAN	1.17e-12	2	2	2	2	2	2	0	0	0	2	2	2	2	2	2	0	0	0	0	2	0	2	2	2	2	2	2	2	2	2	2	0	0	2	2	2	2	2	2	2	2	2	2	2	2
P09758	TACSTD2	Tumor-associated calcium signal transducer 2	TACD2_HUMAN	1.11e-17	5	5	5	5	5	5	5	5	5	5	5	5	5	5	5	5	5	5	5	5	5	5	5	5	5	5	5	5	5	5	5	5	5	5	5	5	5	5	5	5	5	5	5	5	5
P09871	C1S	Complement C1s subcomponent	C1S_HUMAN	8.29e-24	9	9	9	9	9	9	9	9	9	9	9	9	9	9	9	9	9	9	9	9	9	9	9	9	9	9	9	9	9	9	9	9	0	9	9	9	9	9	9	9	9	9	9	9	9
P09923	ALPI	Intestinal-type alkaline phosphatase	PPBI_HUMAN	1.6e-24	13	13	13	13	13	13	13	13	13	13	13	13	13	13	13	13	13	13	13	13	13	13	13	13	13	13	13	13	13	13	13	13	0	13	13	13	13	13	13	13	13	13	13	13	13
P09936	UCHL1	Ubiquitin carboxyl-terminal hydrolase isozyme L1	UCHL1_HUMAN	1.42e-16	11	11	11	11	11	11	11	0	11	11	11	11	11	11	11	11	11	11	11	0	11	11	11	11	11	11	11	11	11	11	11	11	11	11	11	11	11	11	11	11	11	11	11	11	11
P09958	FURIN	Furin	FURIN_HUMAN	5.98e-29	6	6	6	6	6	6	0	6	0	6	6	6	6	6	6	6	6	6	6	6	6	6	6	6	6	6	6	6	6	6	6	6	6	6	6	6	6	6	6	6	6	6	6	6	0
P09960	LTA4H	Leukotriene A-4 hydrolase	LKHA4_HUMAN	1.14e-17	10	10	10	10	10	10	0	0	0	10	10	10	10	10	10	10	10	10	10	0	0	10	10	10	10	10	10	10	10	10	10	10	0	10	10	10	10	10	10	10	10	10	10	10	10
P09972	ALDOC	Fructose-bisphosphate aldolase C	ALDOC_HUMAN	4.81e-23	13	13	13	13	13	13	13	13	13	13	13	13	13	13	13	13	13	13	13	13	0	13	13	13	13	13	13	13	13	13	13	13	13	13	13	13	13	13	13	13	13	13	13	13	13
P0C0L4	C4A	Complement C4-A	CO4A_HUMAN	1.39e-22	4	4	4	4	4	4	0	4	0	4	4	4	4	4	4	0	4	4	4	0	0	4	4	4	4	4	4	4	4	4	4	4	4	4	4	4	4	4	4	4	4	4	4	4	4
P0C0L5	C4B	Complement C4-B	CO4B_HUMAN	2.36e-25	66	66	66	66	66	66	66	66	66	66	66	66	66	66	66	66	66	66	66	66	66	66	66	66	66	66	66	66	66	66	66	66	66	66	66	66	66	66	66	66	66	66	66	66	66
P0C0S5;Q71UI9	H2AFZ;H2AFV	Histone H2A.Z;Histone H2A.V	H2AZ_HUMAN;H2AV_HUMAN	2.97e-14	2	2	2	0	0	0	0	0	0	2	2	2	2	2	2	2	2	2	2	0	0	2	2	2	2	2	2	2	2	2	2	2	0	2	2	2	2	2	2	2	2	2	2	2	2
P0C0S8;P20671;Q16777;Q6FI13;Q96KK5;Q99878;Q9BTM1	HIST1H2AG;HIST1H2AD;HIST2H2AC;HIST2H2AA3;HIST1H2AH;HIST1H2AJ;H2AFJ	Histone H2A type 1;Histone H2A type 1-D;Histone H2A type 2-C;Histone H2A type 2-A;Histone H2A type 1-H;Histone H2A type 1-J;Histone H2A.J	H2A1_HUMAN;H2A1D_HUMAN;H2A2C_HUMAN;H2A2A_HUMAN;H2A1H_HUMAN;H2A1J_HUMAN;H2AJ_HUMAN	1.27e-17	4	4	4	4	4	4	4	4	4	4	4	4	4	4	4	4	4	4	4	4	4	4	4	4	4	4	4	4	4	4	4	4	4	4	4	4	4	4	4	4	4	4	4	4	4
P0C7U0	ELFN1	Protein ELFN1	ELFN1_HUMAN	3.21e-21	3	3	3	3	3	3	0	3	0	3	3	3	3	3	3	3	3	3	3	0	0	3	3	3	3	3	3	3	3	3	3	3	0	3	3	3	3	3	3	3	0	0	3	0	3
P0CAP1	MYZAP	Myocardial zonula adherens protein	MYZAP_HUMAN	9.36e-06	0	0	0	0	0	0	0	0	0	0	0	0	2	2	2	0	0	0	0	0	0	0	0	0	0	0	0	2	2	2	0	0	0	0	0	0	0	0	0	0	0	0	2	0	0
P0DJD8	PGA3	Pepsin A-3	PEPA3_HUMAN	2.19e-10	5	5	5	5	5	5	5	5	5	5	5	5	5	5	5	5	5	5	5	5	5	5	5	5	5	5	5	5	5	5	5	5	5	5	5	5	5	5	5	5	5	5	5	5	5
P0DJI8	SAA1	Serum amyloid A-1 protein	SAA1_HUMAN	3.63e-18	0	0	0	0	3	0	0	0	0	0	0	3	0	0	3	3	0	0	3	3	3	0	3	0	3	3	0	0	0	3	3	3	0	0	3	3	0	0	0	0	3	0	0	0	0
P0DMQ5	INAFM2	Putative transmembrane protein INAFM2	INAM2_HUMAN	2.41e-16	7	7	7	7	7	7	7	7	7	7	7	7	7	7	7	7	7	7	7	7	7	7	7	7	7	7	7	7	7	7	7	7	7	7	7	7	7	7	7	7	7	7	7	7	7
P0DMV8;P0DMV9	HSPA1A;HSPA1B	Heat shock 70 kDa protein 1A;Heat shock 70 kDa protein 1B	HS71A_HUMAN;HS71B_HUMAN	5.98e-29	28	28	28	28	28	28	28	28	28	28	28	28	28	28	28	28	28	28	28	28	28	28	28	28	28	28	28	28	28	28	28	28	28	28	28	28	28	28	28	28	28	28	28	28	28
P0DOX2		Immunoglobulin alpha-2 heavy chain	IGA2_HUMAN	2.32e-24	19	19	19	19	19	19	19	19	19	19	19	19	19	19	19	19	19	19	19	19	19	19	19	19	19	19	19	19	19	19	19	19	19	19	19	19	19	19	19	19	19	19	19	19	19
P0DOX3		Immunoglobulin delta heavy chain	IGD_HUMAN	1.11e-15	4	4	4	4	4	4	0	0	0	4	4	4	4	4	4	4	4	4	4	0	4	4	4	4	4	4	4	4	4	4	4	4	0	4	4	4	4	4	4	4	0	0	4	0	0
P0DOX5		Immunoglobulin gamma-1 heavy chain	IGG1_HUMAN	2.06e-25	19	19	19	19	19	19	19	19	19	19	19	19	19	19	19	19	19	19	19	19	19	19	19	19	19	19	19	19	19	19	19	19	19	19	19	19	19	19	19	19	19	19	19	19	19
P0DOX7		Immunoglobulin kappa light chain	IGK_HUMAN	6.77e-23	11	11	11	11	11	11	11	11	11	11	11	11	11	11	11	11	11	11	11	11	11	11	11	11	11	11	11	11	11	11	11	11	11	11	11	11	11	11	11	11	11	11	11	11	11
P0DOX8		Immunoglobulin lambda-1 light chain	IGL1_HUMAN	1.41e-23	9	9	9	9	9	9	9	9	9	9	9	9	9	9	9	9	9	9	9	9	9	9	9	9	9	9	9	9	9	9	9	9	9	9	9	9	9	9	9	9	9	9	9	9	9
P0DOY2;P0DOY3	IGLC2;IGLC3	Immunoglobulin lambda constant 2;Immunoglobulin lambda constant 3	IGLC2_HUMAN;IGLC3_HUMAN	1.51e-06	2	2	2	2	2	2	2	2	2	2	2	2	2	2	2	2	2	2	2	2	2	2	2	2	2	2	2	2	2	2	2	2	2	2	2	2	2	2	2	2	2	2	2	2	2
P0DP23;P0DP24;P0DP25	CALM1;CALM2;CALM3	Calmodulin-1;Calmodulin-2;Calmodulin-3	CALM1_HUMAN;CALM2_HUMAN;CALM3_HUMAN	1.91e-22	9	9	9	9	9	9	9	9	9	9	9	9	9	9	9	9	9	9	9	9	9	9	9	9	9	9	9	9	9	9	9	9	9	9	9	9	9	9	9	9	9	9	9	9	9
P0DP57	SLURP2	Secreted Ly-6/uPAR domain-containing protein 2	SLUR2_HUMAN	4.71e-13	4	4	4	4	4	4	4	4	4	4	4	4	4	4	4	4	4	4	4	4	4	4	4	4	4	4	4	4	4	4	4	4	4	4	4	4	4	4	4	4	4	4	4	4	4
P0DPH7;P0DPH8	TUBA3C;TUBA3D	Tubulin alpha-3C chain;Tubulin alpha-3D chain	TBA3C_HUMAN;TBA3D_HUMAN	7.91e-23	4	4	4	4	4	4	0	0	0	4	4	4	4	4	4	4	4	0	4	4	0	4	4	0	4	4	4	4	4	4	4	0	0	4	4	4	4	4	4	4	4	4	4	4	4
P10082	PYY	Peptide YY	PYY_HUMAN	3.02e-05	2	0	0	2	2	2	2	2	2	2	0	0	0	2	0	2	0	0	2	2	2	2	2	2	0	0	2	2	2	0	2	2	0	2	0	2	0	0	0	2	0	0	2	0	2
P10109	FDX1	Adrenodoxin, mitochondrial	ADX_HUMAN	7.44e-14	3	3	3	3	0	0	3	3	3	3	3	3	3	3	3	0	3	0	3	3	0	3	3	3	3	3	3	3	3	3	3	3	3	3	3	3	3	3	3	3	0	0	3	3	3
P10124	SRGN	Serglycin	SRGN_HUMAN	1.34e-05	0	0	0	0	3	3	0	0	0	3	0	3	3	3	3	3	3	3	3	0	3	0	3	0	3	3	3	3	0	0	3	3	3	3	3	3	3	0	3	0	0	3	3	0	0
P10153	RNASE2	Non-secretory ribonuclease	RNAS2_HUMAN	2.61e-22	8	8	8	8	8	8	8	8	8	8	8	8	8	8	8	8	8	8	8	8	8	8	8	8	8	8	8	8	8	8	8	8	8	8	8	8	8	8	8	8	8	8	8	8	8
P10155	RO60	60 kDa SS-A/Ro ribonucleoprotein	RO60_HUMAN	1.68e-16	0	0	0	3	3	3	0	0	0	3	3	3	3	3	3	0	3	0	3	0	0	3	3	3	3	3	3	3	3	3	3	0	0	3	3	3	3	3	0	0	0	0	3	0	0
P10253	GAA	Lysosomal alpha-glucosidase	LYAG_HUMAN	4.39e-25	44	44	44	44	44	44	44	44	44	44	44	44	44	44	44	44	44	44	44	44	44	44	44	44	44	44	44	44	44	44	44	44	44	44	44	44	44	44	44	44	44	44	44	44	44
P10301	RRAS	Ras-related protein R-Ras	RRAS_HUMAN	1.04e-14	4	4	4	0	0	0	0	0	0	4	4	4	4	4	4	4	4	4	4	0	0	4	0	0	4	4	4	4	4	4	4	4	4	4	4	4	4	4	4	4	4	4	4	4	0
P10316	HLA-A	HLA class I histocompatibility antigen, A-69 alpha chain	1A69_HUMAN	4.96e-17	6	6	6	6	0	6	6	6	6	6	6	6	6	6	6	6	6	6	6	6	6	6	6	6	6	6	6	6	6	6	6	6	6	6	6	6	6	6	6	6	6	6	6	6	6
P10323	ACR	Acrosin	ACRO_HUMAN	4.33e-19	0	0	0	0	0	0	0	0	0	0	0	0	0	0	0	0	0	0	0	0	0	0	0	7	0	0	0	0	0	0	0	0	0	0	0	0	0	0	0	7	7	7	7	7	7
P10451	SPP1	Osteopontin	OSTP_HUMAN	9e-23	21	21	21	21	21	21	21	21	21	21	21	21	21	21	21	21	21	21	21	21	21	21	21	21	21	21	21	21	21	21	21	21	21	21	21	21	21	21	21	21	21	21	21	21	21
P10515	DLAT	Dihydrolipoyllysine-residue acetyltransferase component of pyruvate dehydrogenase complex, mitochondrial	ODP2_HUMAN	7.51e-14	2	2	2	2	2	2	2	0	2	2	2	2	2	2	2	0	0	0	0	2	2	2	2	2	2	2	2	2	2	2	2	2	0	2	2	2	2	2	2	2	2	2	2	2	2
P10586	PTPRF	Receptor-type tyrosine-protein phosphatase F	PTPRF_HUMAN	2.09e-20	7	7	7	7	7	7	7	7	7	7	7	7	7	7	7	7	7	7	7	7	7	7	7	7	7	7	7	7	7	7	7	7	7	7	7	7	7	7	7	7	7	7	7	7	7
P10599	TXN	Thioredoxin	THIO_HUMAN	5.03e-27	8	8	8	8	8	8	8	8	8	8	8	8	8	8	8	8	8	8	8	8	8	8	8	8	8	8	8	8	8	8	8	8	8	8	8	8	8	8	8	8	8	8	8	8	8
P10606	COX5B	Cytochrome c oxidase subunit 5B, mitochondrial	COX5B_HUMAN	9.16e-17	4	4	4	4	4	4	0	0	0	4	4	4	4	4	4	4	4	0	4	4	4	4	4	4	4	4	4	4	4	4	0	4	0	4	4	4	4	4	4	4	4	4	4	4	4
P10619	CTSA	Lysosomal protective protein	PPGB_HUMAN	4.17e-26	14	14	14	14	14	14	14	14	14	14	14	14	14	14	14	14	14	14	14	0	14	14	14	14	14	14	14	14	14	14	14	14	14	14	14	14	14	14	14	14	14	14	14	14	14
P10643	C7	Complement component C7	CO7_HUMAN	6.72e-27	25	25	25	25	25	25	25	25	25	25	25	25	25	25	25	25	25	25	25	25	25	25	25	25	25	25	25	25	25	25	25	25	25	25	25	25	25	25	25	25	25	25	25	25	25
P10645	CHGA	Chromogranin-A	CMGA_HUMAN	5.68e-24	7	7	7	7	7	7	7	7	7	7	7	7	7	7	7	7	7	7	7	7	7	7	7	7	7	7	7	7	7	7	7	7	7	7	7	7	7	7	7	7	7	7	7	7	7
P10646	TFPI	Tissue factor pathway inhibitor	TFPI1_HUMAN	2.23e-24	2	2	2	2	2	2	2	2	2	2	2	2	2	2	2	2	2	2	2	2	2	2	2	2	2	2	2	2	2	2	2	2	0	2	2	2	2	2	2	2	2	2	2	2	2
P10721	KIT	Mast/stem cell growth factor receptor Kit	KIT_HUMAN	7.23e-20	5	5	5	5	5	5	5	5	5	5	5	5	5	5	5	5	5	5	5	5	5	5	5	5	5	5	5	5	5	5	5	5	5	5	5	5	5	5	5	5	5	5	5	5	5
P10768	ESD	S-formylglutathione hydrolase	ESTD_HUMAN	3.38e-15	8	8	8	8	8	8	8	8	0	8	8	8	8	8	8	8	8	8	8	0	0	8	8	8	8	8	8	8	8	8	8	0	8	8	8	8	8	8	8	8	8	8	8	8	8
P10809	HSPD1	60 kDa heat shock protein, mitochondrial	CH60_HUMAN	6.5e-25	10	10	10	10	10	10	10	0	0	10	10	10	10	10	10	10	10	10	10	0	0	10	10	10	10	10	10	10	10	10	0	10	0	10	10	10	10	10	10	10	10	10	10	10	10
P10909	CLU	Clusterin	CLUS_HUMAN	9e-22	24	24	24	24	24	24	24	24	24	24	24	24	24	24	24	24	24	24	24	24	24	24	24	24	24	24	24	24	24	24	24	24	24	24	24	24	24	24	24	24	24	24	24	24	24
P10912	GHR	Growth hormone receptor	GHR_HUMAN	5.53e-26	7	7	7	7	7	7	7	7	7	7	7	7	7	7	7	7	7	7	7	7	7	7	7	7	7	7	7	7	7	7	7	7	0	7	7	7	7	7	7	7	7	7	7	7	7
P11021	HSPA5	Endoplasmic reticulum chaperone BiP	BIP_HUMAN	5.98e-29	30	30	30	30	30	30	30	30	30	30	30	30	30	30	30	30	30	30	30	30	30	30	30	30	30	30	30	30	30	30	30	30	30	30	30	30	30	30	30	30	30	30	30	30	30
P11047	LAMC1	Laminin subunit gamma-1	LAMC1_HUMAN	2.4e-26	26	26	26	26	26	26	26	26	26	26	26	26	26	26	26	26	26	26	26	26	26	26	26	26	26	26	26	26	26	26	26	26	26	26	26	26	26	26	26	26	26	26	26	26	26
P11117	ACP2	Lysosomal acid phosphatase	PPAL_HUMAN	4.17e-26	16	16	16	16	16	16	16	16	16	16	16	16	16	16	16	16	16	16	16	16	16	16	16	16	16	16	16	16	16	16	16	16	16	16	16	16	16	16	16	16	16	16	16	16	16
P11142	HSPA8	Heat shock cognate 71 kDa protein	HSP7C_HUMAN	1.1e-23	32	32	32	32	32	32	32	32	32	32	32	32	32	32	32	32	32	32	32	32	32	32	32	32	32	32	32	32	32	32	32	32	32	32	32	32	32	32	32	32	32	32	32	32	32
P11166	SLC2A1	Solute carrier family 2, facilitated glucose transporter member 1	GTR1_HUMAN	9.25e-14	7	0	7	7	7	7	7	0	0	7	0	7	7	7	7	0	7	7	7	0	0	7	7	7	0	7	7	7	7	0	0	0	0	7	7	7	7	7	7	0	7	7	7	0	7
P11168	SLC2A2	Solute carrier family 2, facilitated glucose transporter member 2	GTR2_HUMAN	1.33e-16	2	0	2	0	0	0	2	2	2	2	2	2	2	2	2	2	2	2	0	2	2	2	2	2	2	2	2	2	2	2	2	2	0	2	2	2	2	2	2	2	0	2	2	2	2
P11171	EPB41	Protein 4.1	41_HUMAN	1e-09	14	14	14	14	14	14	14	0	14	14	14	14	14	14	14	14	14	14	14	14	14	14	14	14	14	14	14	14	14	14	14	14	14	14	14	14	14	14	14	14	14	14	14	14	14
P11215	ITGAM	Integrin alpha-M	ITAM_HUMAN	8.58e-11	10	10	10	10	10	10	10	10	10	10	10	10	10	10	10	10	10	0	10	10	10	10	10	10	10	10	10	10	10	10	10	10	0	10	10	10	10	10	10	10	0	0	10	0	0
P11216	PYGB	Glycogen phosphorylase, brain form	PYGB_HUMAN	1.08e-18	12	12	12	12	12	12	0	0	0	12	12	12	12	12	12	12	0	12	12	0	0	12	12	12	12	12	12	12	12	12	0	12	0	12	12	12	12	12	12	12	0	0	12	0	12
P11217	PYGM	Glycogen phosphorylase, muscle form	PYGM_HUMAN	2.61e-12	0	0	0	0	4	0	0	0	0	4	4	4	4	4	4	4	0	4	4	0	0	0	0	4	4	4	4	4	4	4	0	0	0	4	4	4	4	4	4	0	0	0	4	0	0
P11233	RALA	Ras-related protein Ral-A	RALA_HUMAN	5.93e-22	2	2	2	2	2	2	2	2	2	2	2	2	2	2	2	2	2	2	2	0	0	2	0	2	2	2	2	2	2	2	2	2	0	2	2	2	2	2	2	2	2	2	2	2	2
P11234	RALB	Ras-related protein Ral-B	RALB_HUMAN	1.07e-18	6	6	6	6	6	6	6	6	6	6	6	6	6	6	6	6	6	6	6	6	0	6	6	6	6	6	6	6	6	6	6	6	0	6	6	6	6	6	6	6	6	6	6	6	6
P11277	SPTB	Spectrin beta chain, erythrocytic	SPTB1_HUMAN	1.78e-20	59	59	59	59	59	59	0	0	59	59	59	59	59	59	59	59	59	59	59	0	0	59	59	59	59	59	59	59	59	59	59	59	59	59	59	59	59	59	59	59	59	59	59	59	59
P11279	LAMP1	Lysosome-associated membrane glycoprotein 1	LAMP1_HUMAN	1.05e-19	7	7	7	7	7	7	7	7	7	7	7	7	7	7	7	7	7	7	7	7	7	7	7	7	7	7	7	7	7	7	7	7	7	7	7	7	7	7	7	7	7	7	7	7	7
P11310	ACADM	Medium-chain specific acyl-CoA dehydrogenase, mitochondrial	ACADM_HUMAN	4.28e-06	2	2	0	0	0	0	0	0	0	2	2	2	2	2	2	0	0	0	2	0	0	2	2	2	2	2	2	2	2	2	0	0	0	2	2	2	2	2	2	2	2	2	2	2	0
P11362	FGFR1	Fibroblast growth factor receptor 1	FGFR1_HUMAN	6.15e-29	8	8	8	8	8	8	8	8	8	8	8	8	8	8	8	8	8	8	8	8	8	8	8	8	8	8	8	8	8	8	8	8	8	8	8	8	8	8	8	8	8	8	8	8	8
P11413	G6PD	Glucose-6-phosphate 1-dehydrogenase	G6PD_HUMAN	9.63e-20	9	9	9	9	9	9	0	0	0	9	9	9	9	9	9	0	9	9	9	0	0	9	9	9	9	9	9	9	9	9	9	0	0	9	9	9	9	9	9	9	9	0	9	9	9
P11586	MTHFD1	C-1-tetrahydrofolate synthase, cytoplasmic	C1TC_HUMAN	6.25e-20	14	14	14	14	14	14	0	14	14	14	14	14	14	14	14	14	14	14	14	0	14	14	14	14	14	14	14	14	14	14	14	14	0	14	14	14	14	14	14	14	14	14	14	14	14
P11597	CETP	Cholesteryl ester transfer protein	CETP_HUMAN	1.2e-17	11	11	11	11	11	11	0	0	0	11	11	11	11	11	11	11	11	11	11	0	0	11	11	11	11	11	11	11	11	11	11	11	0	11	11	11	11	11	11	11	11	11	11	11	11
P11684	SCGB1A1	Uteroglobin	UTER_HUMAN	1.2e-19	4	4	4	4	4	4	4	4	4	4	4	4	4	4	4	4	4	4	4	4	4	4	4	4	4	4	4	4	4	4	4	4	4	4	4	4	4	4	4	4	4	4	4	4	4
P11717	IGF2R	Cation-independent mannose-6-phosphate receptor	MPRI_HUMAN	5.98e-29	29	29	29	29	29	29	29	29	29	29	29	29	29	29	29	29	29	29	29	29	29	29	29	29	29	29	29	29	29	29	29	29	29	29	29	29	29	29	29	29	29	29	29	29	29
P11766	ADH5	Alcohol dehydrogenase class-3	ADHX_HUMAN	6.38e-18	10	10	10	10	10	10	10	0	10	10	10	10	10	10	10	10	10	10	10	10	0	10	10	10	10	10	10	10	10	10	10	10	10	10	10	10	10	10	10	10	10	10	10	10	10
P11940	PABPC1	Polyadenylate-binding protein 1	PABP1_HUMAN	3.15e-23	5	5	5	5	5	0	0	0	0	5	5	5	5	5	5	5	0	0	5	0	0	5	0	0	5	5	5	5	5	5	0	0	0	5	5	5	5	5	5	5	0	0	5	5	0
P12035	KRT3	Keratin, type II cytoskeletal 3	K2C3_HUMAN	2.98e-09	4	0	0	0	0	0	4	0	0	0	0	0	4	4	4	4	4	4	0	0	0	0	0	0	4	4	4	4	4	4	0	0	0	4	0	4	4	0	4	0	0	0	4	0	0
P12081	HARS	Histidine--tRNA ligase, cytoplasmic	SYHC_HUMAN	3.32e-15	0	0	0	0	0	0	0	0	0	0	3	3	3	3	3	3	3	3	3	0	0	3	0	0	3	3	0	3	3	3	0	3	0	3	3	0	3	0	3	0	0	0	0	0	0
P12109	COL6A1	Collagen alpha-1(VI) chain	CO6A1_HUMAN	5.2e-28	43	43	43	43	43	43	43	43	43	43	43	43	43	43	43	43	43	43	43	43	43	43	43	43	43	43	43	43	43	43	43	43	43	43	43	43	43	43	43	43	43	43	43	43	43
P12110	COL6A2	Collagen alpha-2(VI) chain	CO6A2_HUMAN	5.83e-26	4	4	4	4	4	4	4	4	4	4	4	4	4	4	4	4	4	0	4	4	4	4	4	4	4	4	4	4	4	4	4	4	0	4	4	4	4	4	4	4	4	4	4	4	4
P12111	COL6A3	Collagen alpha-3(VI) chain	CO6A3_HUMAN	2.35e-28	35	35	35	35	35	35	35	35	35	35	35	35	35	35	35	35	35	35	35	35	35	35	35	35	35	35	35	35	35	35	35	35	35	35	35	35	35	35	35	35	35	35	35	35	35
P12259	F5	Coagulation factor V	FA5_HUMAN	4.06e-17	8	8	8	8	8	8	8	8	8	8	8	8	8	8	8	8	8	8	8	8	8	8	8	8	8	8	8	8	8	8	8	8	8	8	8	8	8	8	8	8	8	8	8	8	8
P12273	PIP	Prolactin-inducible protein	PIP_HUMAN	4.85e-24	12	12	12	12	12	12	12	12	12	12	12	12	12	12	12	12	12	12	12	12	12	12	12	12	12	12	12	12	12	12	12	12	12	12	12	12	12	12	12	12	12	12	12	12	12
P12277	CKB	Creatine kinase B-type	KCRB_HUMAN	8.06e-23	11	11	11	11	11	11	11	11	0	11	11	11	11	11	11	11	11	11	11	11	11	11	11	11	11	11	11	11	11	11	11	11	0	11	11	11	11	11	11	11	11	11	11	11	11
P12318	FCGR2A	Low affinity immunoglobulin gamma Fc region receptor II-a	FCG2A_HUMAN	3.06e-13	0	0	0	5	0	0	5	5	5	5	5	5	5	5	5	5	5	5	5	0	5	5	5	5	5	5	5	5	5	5	5	5	0	5	5	5	5	5	5	0	0	0	5	0	0
P12319	FCER1A	High affinity immunoglobulin epsilon receptor subunit alpha	FCERA_HUMAN	3.8e-14	2	2	2	2	2	0	2	2	2	2	2	2	2	2	2	2	2	2	2	2	2	2	2	2	2	2	2	2	2	2	2	2	2	2	2	2	2	2	2	2	2	2	2	2	2
P12429	ANXA3	Annexin A3	ANXA3_HUMAN	1.73e-26	18	18	18	18	18	18	18	18	18	18	18	18	18	18	18	18	18	18	18	0	0	18	18	18	18	18	18	18	18	18	18	18	0	18	18	18	18	18	18	18	18	18	18	18	18
P12532	CKMT1A	Creatine kinase U-type, mitochondrial	KCRU_HUMAN	4.54e-19	0	8	8	0	0	0	0	8	0	8	8	8	8	8	8	8	0	0	8	0	0	8	8	0	8	8	8	8	8	8	8	0	0	8	8	8	8	8	0	0	0	0	8	0	0
P12724	RNASE3	Eosinophil cationic protein	ECP_HUMAN	7.78e-20	4	4	4	4	4	4	0	4	0	4	4	4	4	4	4	4	4	4	4	4	4	4	4	4	4	4	4	4	4	4	4	4	0	4	4	4	4	4	4	4	4	4	4	4	4
P12814	ACTN1	Alpha-actinin-1	ACTN1_HUMAN	3.75e-24	33	33	33	33	33	33	33	33	33	33	33	33	33	33	33	33	33	33	33	33	33	33	33	33	33	33	33	33	33	33	33	33	33	33	33	33	33	33	33	33	33	33	33	33	33
P12821	ACE	Angiotensin-converting enzyme	ACE_HUMAN	2.83e-23	20	20	20	20	20	20	0	0	0	20	20	20	20	20	20	20	20	20	20	0	0	20	20	20	20	20	20	20	20	20	20	20	0	20	20	20	20	20	20	20	20	20	20	20	20
P12830	CDH1	Cadherin-1	CADH1_HUMAN	2.24e-24	20	20	20	20	20	20	20	20	20	20	20	20	20	20	20	20	20	20	20	20	20	20	20	20	20	20	20	20	20	20	20	20	20	20	20	20	20	20	20	20	20	20	20	20	20
P12931	SRC	Proto-oncogene tyrosine-protein kinase Src	SRC_HUMAN	1.32e-18	5	5	5	5	5	5	5	0	0	5	5	5	5	5	5	5	5	5	5	0	0	5	5	0	5	5	5	5	5	5	5	5	5	5	5	5	5	5	5	5	5	5	5	5	5
P12955	PEPD	Xaa-Pro dipeptidase	PEPD_HUMAN	7.82e-25	16	16	16	16	16	16	0	16	0	16	16	16	16	16	16	16	16	16	16	16	16	16	16	16	16	16	16	16	16	16	16	16	0	16	16	16	16	16	16	16	16	16	16	16	16
P12956	XRCC6	X-ray repair cross-complementing protein 6	XRCC6_HUMAN	2.4e-09	4	4	4	4	0	4	0	0	0	4	4	4	4	4	4	0	4	4	4	0	0	4	4	4	4	4	4	4	4	4	4	4	0	4	0	4	4	4	4	0	0	4	4	4	0
P13010	XRCC5	X-ray repair cross-complementing protein 5	XRCC5_HUMAN	7.62e-22	0	4	4	0	4	0	0	0	0	0	4	4	4	4	4	0	0	0	4	0	0	0	0	0	4	4	4	4	4	4	0	0	0	0	4	4	4	4	0	0	0	0	4	0	0
P13073	COX4I1	Cytochrome c oxidase subunit 4 isoform 1, mitochondrial	COX41_HUMAN	1.1e-13	2	2	2	2	2	2	0	0	0	2	2	2	2	2	2	0	0	0	2	0	0	2	2	2	2	2	2	2	2	2	2	2	0	2	2	2	2	2	2	2	2	2	2	2	2
P13284	IFI30	Gamma-interferon-inducible lysosomal thiol reductase	GILT_HUMAN	1.16e-25	7	7	7	7	7	7	7	7	7	7	7	7	7	7	7	7	7	7	7	7	0	7	7	7	7	7	7	7	7	7	7	7	7	7	7	7	7	7	7	7	7	7	7	7	7
P13473	LAMP2	Lysosome-associated membrane glycoprotein 2	LAMP2_HUMAN	9.34e-27	5	5	5	5	5	5	5	5	5	5	5	5	5	5	5	5	5	5	5	5	5	5	5	5	5	5	5	5	5	5	5	5	5	5	5	5	5	5	5	5	5	5	5	5	5
P13489	RNH1	Ribonuclease inhibitor	RINI_HUMAN	5.03e-22	17	17	17	17	17	17	0	17	0	17	17	17	17	17	17	17	17	17	17	0	0	17	17	17	17	17	17	17	17	17	17	17	17	17	17	17	17	17	17	17	17	17	17	17	17
P13521	SCG2	Secretogranin-2	SCG2_HUMAN	1.13e-11	0	0	0	2	2	0	0	0	0	0	0	0	2	2	2	0	2	2	2	2	2	2	2	2	2	0	2	2	2	2	2	2	2	2	2	2	2	2	2	2	2	2	2	2	2
P13591	NCAM1	Neural cell adhesion molecule 1	NCAM1_HUMAN	2.92e-25	15	15	15	15	15	15	15	15	15	15	15	15	15	15	15	15	15	15	15	15	15	15	15	15	15	15	15	15	15	15	15	15	15	15	15	15	15	15	15	15	15	15	15	15	15
P13598	ICAM2	Intercellular adhesion molecule 2	ICAM2_HUMAN	1e-26	6	6	6	6	6	6	6	6	6	6	6	6	6	6	6	6	6	6	6	6	6	6	6	6	6	6	6	6	6	6	6	6	6	6	6	6	6	6	6	6	6	6	6	6	6
P13611	VCAN	Versican core protein	CSPG2_HUMAN	2.39e-24	20	20	20	20	20	20	20	20	20	20	20	20	20	20	20	20	20	20	20	20	20	20	20	20	20	20	20	20	20	20	20	20	20	20	20	20	20	20	20	20	20	20	20	20	20
P13639	EEF2	Elongation factor 2	EF2_HUMAN	5.34e-24	30	30	30	30	30	30	0	30	0	30	30	30	30	30	30	30	30	30	30	30	30	30	30	30	30	30	30	30	30	30	30	30	30	30	30	30	30	30	30	30	30	30	30	30	30
P13645	KRT10	Keratin, type I cytoskeletal 10	K1C10_HUMAN	2.17e-26	33	33	33	33	33	33	33	33	33	33	33	33	33	33	33	33	33	33	33	33	33	33	33	33	33	33	33	33	33	33	33	33	33	33	33	33	33	33	33	33	33	33	33	33	33
P13646	KRT13	Keratin, type I cytoskeletal 13	K1C13_HUMAN	2.61e-25	34	34	34	34	34	34	34	34	34	34	34	34	34	34	34	34	34	34	34	34	34	34	34	34	34	34	34	34	34	34	34	34	34	34	34	34	34	34	34	34	34	34	34	34	34
P13647	KRT5	Keratin, type II cytoskeletal 5	K2C5_HUMAN	4.18e-25	29	29	29	29	29	29	29	29	29	29	29	29	29	29	29	29	29	29	29	29	29	29	29	29	29	29	29	29	29	29	29	29	29	29	29	29	29	29	29	29	29	29	29	29	29
P13667	PDIA4	Protein disulfide-isomerase A4	PDIA4_HUMAN	3.6e-12	5	5	5	5	0	5	0	5	0	5	5	5	5	5	5	5	5	5	5	5	5	5	5	5	5	5	5	5	5	5	0	0	0	5	5	5	5	5	5	5	5	5	5	5	5
P13671	C6	Complement component C6	CO6_HUMAN	2.72e-21	13	13	13	13	13	13	13	13	13	13	13	13	13	13	13	13	13	13	13	13	13	13	13	13	13	13	13	13	13	13	13	13	13	13	13	13	13	13	13	13	13	13	13	13	13
P13688	CEACAM1	Carcinoembryonic antigen-related cell adhesion molecule 1	CEAM1_HUMAN	6.7e-23	4	4	4	0	0	0	4	4	4	4	4	4	4	4	4	4	4	4	4	4	4	4	4	4	4	4	4	4	4	4	4	4	0	4	4	4	4	4	4	4	4	4	4	4	4
P13693	TPT1	Translationally-controlled tumor protein	TCTP_HUMAN	2.71e-23	4	4	4	4	4	4	4	0	4	4	4	4	4	4	4	4	4	4	4	0	0	4	4	4	4	4	4	4	4	4	4	0	4	4	4	4	4	4	4	0	0	4	4	4	0
P13716	ALAD	Delta-aminolevulinic acid dehydratase	HEM2_HUMAN	5.77e-24	13	13	13	13	13	13	13	13	13	13	13	13	13	13	13	13	13	13	13	13	13	13	13	13	13	13	13	13	13	13	13	13	13	13	13	13	13	13	13	13	13	13	13	13	13
P13727	PRG2	Bone marrow proteoglycan	PRG2_HUMAN	2.21e-24	10	10	10	10	10	10	10	10	10	10	10	10	10	10	10	10	10	10	10	10	10	10	10	10	10	10	10	10	10	10	10	10	10	10	10	10	10	10	10	10	10	10	10	10	10
P13796	LCP1	Plastin-2	PLSL_HUMAN	2.7e-26	29	29	29	29	29	29	29	29	29	29	29	29	29	29	29	29	29	29	29	29	0	29	29	29	29	29	29	29	29	29	29	29	0	29	29	29	29	29	29	29	29	29	29	29	29
P13797	PLS3	Plastin-3	PLST_HUMAN	2.82e-28	24	24	24	24	24	24	24	24	24	24	24	24	24	24	24	24	24	24	24	24	0	24	24	24	24	24	24	24	24	24	24	24	0	24	24	24	24	24	24	24	24	24	24	24	24
P13798	APEH	Acylamino-acid-releasing enzyme	ACPH_HUMAN	1.62e-16	13	13	13	13	13	13	0	0	0	13	13	13	13	13	13	13	13	13	13	0	0	13	13	13	13	13	13	13	13	13	13	13	0	13	13	13	13	13	13	13	13	13	13	13	13
P13804	ETFA	Electron transfer flavoprotein subunit alpha, mitochondrial	ETFA_HUMAN	3.73e-16	0	0	0	0	3	3	0	0	0	0	0	3	3	3	3	3	0	3	0	0	0	0	0	0	3	3	3	3	3	3	0	0	0	3	3	3	3	3	3	3	0	0	0	0	0
P13861	PRKAR2A	cAMP-dependent protein kinase type II-alpha regulatory subunit	KAP2_HUMAN	1.85e-19	7	7	7	7	7	7	0	7	0	7	7	7	7	7	7	7	7	0	7	7	7	7	7	7	7	7	7	7	7	7	7	0	0	7	7	7	7	7	7	7	7	7	7	7	7
P13987	CD59	CD59 glycoprotein	CD59_HUMAN	1.07e-20	10	10	10	10	10	10	10	10	10	10	10	10	10	10	10	10	10	10	10	10	10	10	10	10	10	10	10	10	10	10	10	10	10	10	10	10	10	10	10	10	10	10	10	10	10
P14091	CTSE	Cathepsin E	CATE_HUMAN	2.34e-12	0	0	0	0	0	0	0	0	2	2	2	2	2	2	2	2	2	2	2	2	0	2	2	2	2	2	2	2	2	2	2	2	2	2	2	2	2	2	2	2	2	2	2	2	2
P14138	EDN3	Endothelin-3	EDN3_HUMAN	9.21e-09	2	2	2	2	2	2	2	2	2	2	2	2	0	2	2	2	2	2	2	2	2	2	2	2	2	2	2	2	2	2	2	2	2	2	2	2	2	2	2	2	2	2	2	2	2
P14151	SELL	L-selectin	LYAM1_HUMAN	1.91e-13	4	4	4	4	4	4	4	4	4	4	4	4	4	4	4	4	4	4	4	4	4	4	4	4	4	4	4	4	4	4	4	4	4	4	4	4	4	4	4	4	4	4	4	4	4
P14174	MIF	Macrophage migration inhibitory factor	MIF_HUMAN	1.04e-22	3	3	3	3	3	3	3	3	3	3	3	3	3	3	3	3	3	3	3	3	3	3	3	3	3	3	3	3	3	3	3	3	0	3	3	3	3	3	3	3	3	3	3	3	3
P14207	FOLR2	Folate receptor beta	FOLR2_HUMAN	1.66e-16	3	3	3	3	3	3	0	0	0	3	3	3	3	3	3	3	3	3	3	3	0	3	3	3	3	3	3	3	3	3	3	3	0	3	3	3	3	3	3	3	0	0	3	0	3
P14209	CD99	CD99 antigen	CD99_HUMAN	1.82e-25	3	3	3	3	3	3	3	3	3	3	3	3	3	3	3	3	3	3	3	3	3	3	3	3	3	3	3	3	3	3	3	3	3	3	3	3	3	3	3	3	3	3	3	3	3
P14314	PRKCSH	Glucosidase 2 subunit beta	GLU2B_HUMAN	5.48e-22	15	15	15	15	15	15	15	15	15	15	15	15	15	15	15	15	15	15	15	15	15	15	15	15	15	15	15	15	15	15	15	15	15	15	15	15	15	15	15	15	15	15	15	15	15
P14324	FDPS	Farnesyl pyrophosphate synthase	FPPS_HUMAN	4.59e-25	6	6	0	6	6	6	0	0	0	6	6	6	6	6	6	6	6	6	6	0	0	6	0	0	6	6	6	6	6	6	6	6	0	6	6	6	6	6	6	0	0	0	6	0	0
P14384	CPM	Carboxypeptidase M	CBPM_HUMAN	7.23e-23	19	19	19	19	19	19	19	19	19	19	19	19	19	19	19	19	19	19	19	19	19	19	19	19	19	19	19	19	19	19	19	19	19	19	19	19	19	19	19	19	19	19	19	19	19
P14406	COX7A2	Cytochrome c oxidase subunit 7A2, mitochondrial	CX7A2_HUMAN	9.46e-17	2	2	2	2	2	2	0	0	0	2	2	2	2	2	2	2	0	2	2	0	0	2	2	2	2	2	2	2	2	2	2	2	0	2	2	2	2	2	2	2	2	2	2	2	2
P14543	NID1	Nidogen-1	NID1_HUMAN	2.01e-23	26	26	26	26	26	26	26	26	26	26	26	26	26	26	26	26	26	26	26	26	26	26	26	26	26	26	26	26	26	26	26	26	26	26	26	26	26	26	26	26	26	26	26	26	26
P14550	AKR1A1	Aldo-keto reductase family 1 member A1	AK1A1_HUMAN	8.81e-25	21	21	21	21	21	21	21	21	21	21	21	21	21	21	21	21	21	21	21	21	21	21	21	21	21	21	21	21	21	21	21	21	0	21	21	21	21	21	21	21	21	21	21	21	21
P14618	PKM	Pyruvate kinase PKM	KPYM_HUMAN	2.45e-27	33	33	33	33	33	33	33	33	33	33	33	33	33	33	33	33	33	33	33	33	33	33	33	33	33	33	33	33	33	33	33	33	33	33	33	33	33	33	33	33	33	33	33	33	33
P14625	HSP90B1	Endoplasmin	ENPL_HUMAN	4.14e-24	14	14	14	14	14	14	14	14	14	14	14	14	14	14	14	14	14	14	14	14	14	14	14	14	14	14	14	14	14	14	14	14	14	14	14	14	14	14	14	14	14	14	14	14	14
P14678;P63162	SNRPB;SNRPN	Small nuclear ribonucleoprotein-associated proteins B and B';Small nuclear ribonucleoprotein-associated protein N	RSMB_HUMAN;RSMN_HUMAN	1.43e-07	0	2	0	2	0	0	0	0	0	2	2	2	2	2	2	0	0	0	2	0	0	0	0	0	2	2	2	2	2	2	0	0	0	2	0	0	0	2	0	0	0	0	2	0	0
P14735	IDE	Insulin-degrading enzyme	IDE_HUMAN	9.48e-17	0	4	0	0	0	0	0	0	0	4	0	0	4	4	4	0	0	0	4	0	0	0	4	0	0	0	0	4	4	4	0	0	0	4	4	0	4	4	0	4	4	0	4	0	4
P14778	IL1R1	Interleukin-1 receptor type 1	IL1R1_HUMAN	2.83e-12	3	3	3	3	3	3	0	0	0	3	3	3	3	3	3	0	0	0	3	0	0	3	3	3	3	3	3	3	3	3	0	0	0	3	3	3	3	3	3	3	3	0	3	0	3
P14780	MMP9	Matrix metalloproteinase-9	MMP9_HUMAN	2.94e-24	26	26	26	26	26	26	26	26	26	26	26	26	26	26	26	26	26	26	26	26	26	26	26	26	26	26	26	26	26	26	26	26	26	26	26	26	26	26	26	26	26	26	26	26	26
P14784	IL2RB	Interleukin-2 receptor subunit beta	IL2RB_HUMAN	2.93e-20	4	4	4	4	4	4	4	4	4	4	4	4	4	4	4	4	4	4	4	4	0	4	4	4	4	4	4	4	4	4	4	4	0	4	4	4	4	4	4	4	4	4	4	4	0
P14854	COX6B1	Cytochrome c oxidase subunit 6B1	CX6B1_HUMAN	4.07e-18	2	2	2	2	2	2	0	0	0	2	2	2	2	2	2	0	0	0	2	0	2	2	2	2	2	2	2	2	2	2	0	0	0	2	2	2	2	2	2	2	2	2	2	2	2
P14868	DARS	Aspartate--tRNA ligase, cytoplasmic	SYDC_HUMAN	1.54e-11	0	7	7	7	7	7	0	0	0	7	7	7	7	7	7	0	7	0	7	0	0	0	7	7	7	7	7	7	7	7	7	7	0	7	7	7	7	7	7	0	7	0	7	7	7
P14923	JUP	Junction plakoglobin	PLAK_HUMAN	8.93e-26	37	37	37	37	37	37	37	37	37	37	37	37	37	37	37	37	37	37	37	37	37	37	37	37	37	37	37	37	37	37	37	37	37	37	37	37	37	37	37	37	37	37	37	37	37
P15085	CPA1	Carboxypeptidase A1	CBPA1_HUMAN	5.21e-14	0	7	0	7	0	0	0	0	0	7	7	7	0	7	7	0	0	0	7	0	0	0	0	7	7	7	7	0	0	0	0	0	0	7	7	0	0	0	0	0	0	0	7	0	0
P15104	GLUL	Glutamine synthetase	GLNA_HUMAN	2.02e-23	13	13	13	13	13	13	13	13	13	13	13	13	13	13	13	13	13	13	13	13	0	13	13	13	13	13	13	13	13	13	13	13	13	13	13	13	13	13	13	13	13	13	13	13	13
P15121	AKR1B1	Aldo-keto reductase family 1 member B1	ALDR_HUMAN	3.37e-22	15	15	15	15	15	15	15	15	15	15	15	15	15	15	15	15	15	15	15	15	15	15	15	15	15	15	15	15	15	15	15	15	15	15	15	15	15	15	15	15	15	15	15	15	15
P15144	ANPEP	Aminopeptidase N	AMPN_HUMAN	9.12e-27	43	43	43	43	43	43	43	43	43	43	43	43	43	43	43	43	43	43	43	43	43	43	43	43	43	43	43	43	43	43	43	43	43	43	43	43	43	43	43	43	43	43	43	43	43
P15151	PVR	Poliovirus receptor	PVR_HUMAN	3.27e-17	7	7	7	7	7	7	7	7	7	7	7	7	7	7	7	7	7	7	7	7	7	7	7	7	7	7	7	7	7	7	7	7	7	7	7	7	7	7	7	7	7	7	7	7	7
P15153	RAC2	Ras-related C3 botulinum toxin substrate 2	RAC2_HUMAN	4.01e-06	0	0	0	0	2	2	0	0	0	2	2	2	2	2	2	0	2	0	2	0	0	0	0	0	2	0	2	2	2	2	0	0	0	0	0	0	0	0	2	0	0	0	2	0	0
P15260	IFNGR1	Interferon gamma receptor 1	INGR1_HUMAN	1.52e-05	2	2	2	2	2	2	2	2	2	2	2	2	2	2	2	2	2	2	2	0	0	2	2	2	2	2	2	2	2	2	2	2	0	2	2	2	2	2	2	2	0	2	2	2	2
P15289	ARSA	Arylsulfatase A	ARSA_HUMAN	1.46e-23	13	13	13	13	13	13	13	13	13	13	13	13	13	13	13	13	13	13	13	13	13	13	13	13	13	13	13	13	13	13	13	13	13	13	13	13	13	13	13	13	13	13	13	13	13
P15291	B4GALT1	Beta-1,4-galactosyltransferase 1	B4GT1_HUMAN	6.63e-27	7	7	7	7	7	7	0	0	0	7	7	7	7	7	7	7	7	7	7	7	0	7	7	7	7	7	7	7	7	7	7	7	0	7	7	7	7	7	7	7	7	7	7	0	7
P15309	ACPP	Prostatic acid phosphatase	PPAP_HUMAN	2.28e-24	20	20	20	20	20	20	20	20	20	20	20	20	20	20	20	20	20	20	20	20	20	20	20	20	20	20	20	20	20	20	20	20	20	20	20	20	20	20	20	20	20	20	20	20	20
P15311	EZR	Ezrin	EZRI_HUMAN	1.07e-26	24	24	24	24	24	24	24	24	24	24	24	24	24	24	24	24	24	24	24	24	24	24	24	24	24	24	24	24	24	24	24	24	24	24	24	24	24	24	24	24	24	24	24	24	24
P15313	ATP6V1B1	V-type proton ATPase subunit B, kidney isoform	VATB1_HUMAN	2.68e-24	11	11	11	11	11	11	11	11	11	11	11	11	11	11	11	11	11	11	11	11	11	11	11	11	11	11	11	11	11	11	11	11	11	11	11	11	11	11	11	11	11	11	11	11	11
P15328	FOLR1	Folate receptor alpha	FOLR1_HUMAN	4.04e-24	9	9	9	9	9	9	9	9	9	9	9	9	9	9	9	9	9	9	9	9	9	9	9	9	9	9	9	9	9	9	9	9	9	9	9	9	9	9	9	9	9	9	9	9	9
P15374	UCHL3	Ubiquitin carboxyl-terminal hydrolase isozyme L3	UCHL3_HUMAN	1.77e-08	5	5	5	5	5	5	5	5	0	5	5	5	5	5	5	5	0	0	5	0	0	5	5	5	5	5	5	5	5	5	0	0	0	5	5	5	5	5	5	0	0	0	5	5	5
P15428	HPGD	15-hydroxyprostaglandin dehydrogenase [NAD(+)]	PGDH_HUMAN	5.98e-29	9	9	9	9	9	9	9	0	0	9	9	9	9	9	9	9	9	9	9	0	0	9	9	9	9	9	9	9	9	9	9	9	0	9	9	9	9	9	9	9	9	9	9	9	9
P15529	CD46	Membrane cofactor protein	MCP_HUMAN	1.61e-20	6	6	6	6	6	6	6	6	6	6	6	6	6	6	6	6	6	6	6	6	6	6	6	6	6	6	6	6	6	6	6	6	6	6	6	6	6	6	6	6	6	6	6	6	6
P15531	NME1	Nucleoside diphosphate kinase A	NDKA_HUMAN	1.16e-15	5	5	5	5	5	5	0	0	0	5	5	5	5	5	5	5	5	0	5	0	0	0	0	0	5	5	5	5	5	5	0	0	0	5	5	5	5	0	5	5	5	0	5	0	0
P15586	GNS	N-acetylglucosamine-6-sulfatase	GNS_HUMAN	5.98e-29	15	15	15	15	15	15	15	15	15	15	15	15	15	15	15	15	15	15	15	15	15	15	15	15	15	15	15	15	15	15	15	15	15	15	15	15	15	15	15	15	15	15	15	15	15
P15848	ARSB	Arylsulfatase B	ARSB_HUMAN	6.38e-23	12	12	12	12	12	12	12	12	12	12	12	12	12	12	12	12	12	12	12	0	0	12	12	12	12	12	12	12	12	12	12	12	0	12	12	12	12	12	12	12	12	12	12	12	12
P15880	RPS2	40S ribosomal protein S2	RS2_HUMAN	1.88e-10	5	0	5	5	0	0	0	0	0	5	5	5	5	5	5	5	5	5	5	0	0	5	5	0	5	5	5	5	5	5	5	0	0	5	5	5	5	5	5	0	0	5	5	5	0
P15907	ST6GAL1	Beta-galactoside alpha-2,6-sialyltransferase 1	SIAT1_HUMAN	3.34e-19	6	6	6	6	6	6	0	0	0	6	6	6	6	6	6	6	6	6	6	0	0	6	0	6	6	6	6	6	6	6	0	6	0	6	6	6	6	6	6	0	6	6	6	0	0
P15924	DSP	Desmoplakin	DESP_HUMAN	2.9e-27	164	164	164	164	164	164	164	164	164	164	164	164	164	164	164	164	164	164	164	164	164	164	164	164	164	164	164	164	164	164	164	164	164	164	164	164	164	164	164	164	164	164	164	164	164
P15941	MUC1	Mucin-1	MUC1_HUMAN	4.87e-24	8	8	8	8	8	8	8	8	8	8	8	8	8	8	8	8	8	8	8	8	8	8	8	8	8	8	8	8	8	8	8	8	8	8	8	8	8	8	8	8	8	8	8	8	8
P16035	TIMP2	Metalloproteinase inhibitor 2	TIMP2_HUMAN	1.22e-24	8	8	8	8	8	8	8	8	8	8	8	8	8	8	8	8	8	8	8	0	8	8	8	8	8	8	8	8	8	8	8	8	0	8	8	8	8	8	8	8	8	8	8	8	8
P16066	NPR1	Atrial natriuretic peptide receptor 1	ANPRA_HUMAN	4.74e-14	7	7	7	7	7	7	0	7	7	7	7	7	7	7	7	7	7	7	7	0	7	7	7	7	7	7	7	7	7	7	7	7	7	7	7	7	7	7	7	7	0	7	7	0	0
P16070	CD44	CD44 antigen	CD44_HUMAN	3.02e-16	9	9	9	9	9	9	9	9	9	9	9	9	9	9	9	9	9	9	9	9	9	9	9	9	9	9	9	9	9	9	9	9	9	9	9	9	9	9	9	9	9	9	9	9	9
P16083	NQO2	Ribosyldihydronicotinamide dehydrogenase [quinone]	NQO2_HUMAN	4.1e-21	7	7	7	7	7	7	0	7	0	7	7	7	7	7	7	7	7	7	7	0	7	0	7	7	7	7	7	7	7	7	7	7	7	7	7	7	7	7	7	0	0	0	7	0	0
P16109	SELP	P-selectin	LYAM3_HUMAN	4.22e-12	3	3	3	3	3	3	3	3	3	3	3	3	3	3	3	3	3	3	3	3	3	3	3	3	3	3	3	3	3	3	3	3	3	3	3	3	3	3	3	3	3	3	3	3	3
P16112	ACAN	Aggrecan core protein	PGCA_HUMAN	2.03e-23	24	24	24	24	24	24	24	24	24	24	24	24	24	24	24	24	24	24	24	24	24	24	24	24	24	24	24	24	24	24	24	24	24	24	24	24	24	24	24	24	24	24	24	24	24
P16144	ITGB4	Integrin beta-4	ITB4_HUMAN	7.92e-08	0	0	0	0	0	0	2	2	2	2	0	2	0	0	0	2	2	2	2	0	0	2	2	2	2	2	2	0	0	0	2	2	2	2	0	2	2	2	2	2	0	0	2	0	2
P16150	SPN	Leukosialin	LEUK_HUMAN	4.63e-15	0	0	0	0	0	0	2	2	2	2	0	2	0	0	0	0	0	0	0	2	2	2	2	2	0	0	0	0	0	0	2	0	0	0	0	0	0	0	0	0	0	0	2	0	0
P16152	CBR1	Carbonyl reductase [NADPH] 1	CBR1_HUMAN	1.27e-26	16	16	16	16	16	16	16	16	16	16	16	16	16	16	16	16	16	16	16	16	16	16	16	16	16	16	16	16	16	16	16	16	0	16	16	16	16	16	16	16	16	16	16	16	16
P16157	ANK1	Ankyrin-1	ANK1_HUMAN	7.07e-21	45	45	45	45	45	45	45	0	45	45	45	45	45	45	45	45	45	45	45	0	45	45	45	45	45	45	45	45	45	45	45	45	0	45	45	45	45	45	45	45	45	0	45	45	0
P16234	PDGFRA	Platelet-derived growth factor receptor alpha	PGFRA_HUMAN	5.2e-20	2	2	2	2	2	2	2	2	2	2	2	2	2	2	2	2	2	2	2	2	2	2	2	2	2	2	2	2	2	2	2	2	2	2	2	2	2	2	2	2	2	2	2	2	2
P16278	GLB1	Beta-galactosidase	BGAL_HUMAN	4.21e-23	20	20	20	20	20	20	20	20	20	20	20	20	20	20	20	20	20	20	20	20	20	20	20	20	20	20	20	20	20	20	20	20	20	20	20	20	20	20	20	20	20	20	20	20	20
P16284	PECAM1	Platelet endothelial cell adhesion molecule	PECA1_HUMAN	5.98e-29	8	8	8	8	8	8	8	8	8	8	8	8	8	8	8	8	8	8	8	8	8	8	8	8	8	8	8	8	8	8	8	8	8	8	8	8	8	8	8	8	8	8	8	8	8
P16401	HIST1H1B	Histone H1.5	H15_HUMAN	6.42e-19	6	6	6	6	6	0	6	6	6	6	6	6	6	6	6	6	6	6	6	6	6	6	6	6	6	6	6	6	6	6	6	6	6	6	6	6	6	6	6	0	0	0	6	6	0
P16402	HIST1H1D	Histone H1.3	H13_HUMAN	2.39e-24	7	7	7	7	7	7	7	7	7	7	7	7	7	7	7	7	7	7	7	7	7	7	7	7	7	7	7	7	7	7	7	7	7	7	7	7	7	7	7	7	7	7	7	7	7
P16422	EPCAM	Epithelial cell adhesion molecule	EPCAM_HUMAN	4.73e-15	3	3	3	3	3	3	3	3	3	3	3	3	3	3	3	3	3	3	3	3	3	3	3	3	3	3	3	3	3	3	3	3	3	3	3	3	3	3	3	3	3	3	3	3	3
P16435	POR	NADPH--cytochrome P450 reductase	NCPR_HUMAN	3.35e-05	0	0	0	0	0	0	0	0	0	2	0	0	2	2	2	0	0	0	0	0	0	0	0	0	2	0	0	2	2	2	0	0	0	0	0	0	2	0	0	0	0	0	2	0	0
P16442	ABO	Histo-blood group ABO system transferase	BGAT_HUMAN	4.83e-15	3	3	3	3	3	3	3	3	3	3	3	3	3	3	3	3	3	3	3	3	3	3	3	3	3	3	3	3	3	3	3	3	3	3	3	3	3	3	3	3	3	3	3	3	3
P16444	DPEP1	Dipeptidase 1	DPEP1_HUMAN	5.98e-29	14	14	14	14	14	14	14	14	14	14	14	14	14	14	14	14	14	14	14	14	14	14	14	14	14	14	14	14	14	14	14	14	14	14	14	14	14	14	14	14	14	14	14	14	14
P16452	EPB42	Erythrocyte membrane protein band 4.2	EPB42_HUMAN	7.51e-13	15	0	15	15	15	15	0	0	15	15	0	15	15	15	15	15	15	0	15	15	0	15	15	15	15	15	15	15	0	15	15	15	15	15	15	15	15	15	15	15	15	0	15	15	0
P16615	ATP2A2	Sarcoplasmic/endoplasmic reticulum calcium ATPase 2	AT2A2_HUMAN	1.48e-20	10	10	10	0	10	10	0	0	0	10	10	10	10	10	10	10	0	0	10	0	0	10	10	10	10	10	10	10	10	10	10	0	0	10	10	0	10	10	0	0	0	0	10	0	0
P16870	CPE	Carboxypeptidase E	CBPE_HUMAN	2.27e-23	19	19	19	19	19	19	19	19	19	19	19	19	19	19	19	19	19	19	19	19	19	19	19	19	19	19	19	19	19	19	19	19	19	19	19	19	19	19	19	19	19	19	19	19	19
P16930	FAH	Fumarylacetoacetase	FAAA_HUMAN	2.01e-22	12	12	12	12	12	12	12	12	0	12	12	12	12	12	12	12	12	12	12	12	0	12	12	12	12	12	12	12	12	12	12	12	12	12	12	12	12	12	12	12	12	12	12	12	12
P16949	STMN1	Stathmin	STMN1_HUMAN	2.95e-06	2	2	2	0	0	0	0	0	0	2	0	2	2	2	2	0	0	2	2	0	0	2	0	0	2	2	2	2	0	0	0	0	0	0	2	0	0	0	0	0	2	0	2	0	0
P17050	NAGA	Alpha-N-acetylgalactosaminidase	NAGAB_HUMAN	1.24e-21	9	9	9	9	9	9	0	0	0	9	9	9	9	9	9	9	9	9	9	0	0	9	9	9	9	9	9	9	9	9	9	9	9	9	9	9	9	9	9	9	9	9	9	9	9
P17174	GOT1	Aspartate aminotransferase, cytoplasmic	AATC_HUMAN	5.98e-29	19	19	19	19	19	19	0	19	19	19	19	19	19	19	19	19	19	19	19	0	0	19	19	19	19	19	19	19	19	19	19	19	19	19	19	19	19	19	19	19	19	19	19	19	19
P17181	IFNAR1	Interferon alpha/beta receptor 1	INAR1_HUMAN	2.28e-17	4	4	4	4	4	4	4	4	4	4	4	4	4	4	4	4	4	4	4	4	4	4	4	4	4	4	4	4	4	4	4	4	0	4	4	4	4	4	4	4	0	0	4	0	0
P17213	BPI	Bactericidal permeability-increasing protein	BPI_HUMAN	7.98e-19	4	4	4	4	4	4	0	0	0	4	4	4	4	4	4	4	4	0	4	0	0	0	0	0	4	4	4	4	4	4	0	0	0	0	4	0	0	0	0	0	0	0	4	0	0
P17342	NPR3	Atrial natriuretic peptide receptor 3	ANPRC_HUMAN	3.47e-28	13	13	13	13	13	13	13	0	0	13	13	13	13	13	13	13	13	13	13	0	0	13	13	13	13	13	13	13	13	13	13	13	0	13	13	13	13	13	13	13	13	13	13	13	13
P17405	SMPD1	Sphingomyelin phosphodiesterase	ASM_HUMAN	1.07e-17	3	3	3	3	3	3	0	0	0	3	3	3	3	3	3	3	3	0	3	0	0	3	3	0	3	3	3	3	3	3	3	3	0	3	3	3	3	3	3	3	3	3	3	3	3
P17655	CAPN2	Calpain-2 catalytic subunit	CAN2_HUMAN	2.92e-20	12	12	12	12	12	12	0	0	0	12	12	12	12	12	12	12	12	12	12	0	0	12	0	12	12	12	12	12	12	12	12	12	0	12	12	12	12	12	12	12	12	12	12	12	12
P17813	ENG	Endoglin	EGLN_HUMAN	1.31e-21	5	5	5	5	5	5	5	5	5	5	5	5	5	5	5	5	5	5	5	5	5	5	5	5	5	5	5	5	5	5	5	5	0	5	5	5	5	5	5	5	5	5	5	5	5
P17858	PFKL	ATP-dependent 6-phosphofructokinase, liver type	PFKAL_HUMAN	2.92e-26	9	9	9	9	9	9	0	0	0	9	9	9	9	9	9	9	9	9	9	0	0	9	9	9	9	9	9	9	9	9	9	9	0	9	9	9	9	9	9	9	9	9	9	9	9
P17900	GM2A	Ganglioside GM2 activator	SAP3_HUMAN	2.48e-23	10	10	10	10	10	10	10	10	10	10	10	10	10	10	10	10	10	10	10	10	10	10	10	10	10	10	10	10	10	10	10	10	10	10	10	10	10	10	10	10	10	10	10	10	10
P17927	CR1	Complement receptor type 1	CR1_HUMAN	1.35e-21	11	11	11	11	11	11	11	11	11	11	11	11	11	11	11	11	11	11	11	11	11	11	11	11	11	11	11	11	11	11	11	11	11	11	11	11	11	11	11	11	11	11	11	11	11
P17931	LGALS3	Galectin-3	LEG3_HUMAN	3.55e-22	7	7	7	7	7	7	7	7	7	7	7	7	7	7	7	7	7	7	7	7	7	7	7	7	7	7	7	7	7	7	7	7	7	7	7	7	7	7	7	7	7	7	7	7	7
P17936	IGFBP3	Insulin-like growth factor-binding protein 3	IBP3_HUMAN	2.85e-19	11	11	11	11	11	11	11	11	11	11	11	11	11	11	11	11	11	11	11	11	11	11	11	11	11	11	11	11	11	11	11	11	11	11	11	11	11	11	11	11	11	11	11	11	11
P17980	PSMC3	26S proteasome regulatory subunit 6A	PRS6A_HUMAN	1.91e-14	0	6	0	6	6	6	0	0	0	6	6	6	6	6	6	0	0	6	6	0	0	6	0	0	6	6	6	6	6	6	0	0	0	6	6	6	6	6	6	0	0	0	6	6	0
P17987	TCP1	T-complex protein 1 subunit alpha	TCPA_HUMAN	4.49e-20	16	16	16	16	16	16	0	0	0	16	16	16	16	16	16	16	16	16	16	0	0	0	16	0	16	16	16	16	16	16	16	16	0	16	16	16	16	16	16	16	16	16	16	16	16
P18054	ALOX12	Arachidonate 12-lipoxygenase, 12S-type	LOX12_HUMAN	2.91e-20	21	21	21	21	21	21	0	0	0	21	21	21	21	21	21	21	21	21	21	0	0	21	21	21	21	21	21	21	21	21	21	0	0	21	21	21	21	21	21	21	0	0	21	0	0
P18065	IGFBP2	Insulin-like growth factor-binding protein 2	IBP2_HUMAN	7.14e-29	16	16	16	16	16	16	16	16	16	16	16	16	16	16	16	16	16	16	16	16	16	16	16	16	16	16	16	16	16	16	16	16	16	16	16	16	16	16	16	16	16	16	16	16	16
P18124	RPL7	60S ribosomal protein L7	RL7_HUMAN	4.97e-20	6	6	6	6	6	6	0	0	0	6	6	6	6	6	6	6	6	0	6	0	0	6	6	6	6	6	6	6	6	6	6	6	0	6	6	6	6	6	6	6	0	0	6	0	6
P18206	VCL	Vinculin	VINC_HUMAN	4.24e-27	29	29	29	29	29	29	29	29	29	29	29	29	29	29	29	29	29	29	29	0	0	29	29	29	29	29	29	29	29	29	29	29	0	29	29	29	29	29	29	29	29	29	29	29	29
P18428	LBP	Lipopolysaccharide-binding protein	LBP_HUMAN	4.58e-25	6	6	6	6	6	6	0	0	0	6	6	6	6	6	6	6	6	6	6	0	0	6	6	6	6	6	6	6	6	6	6	6	0	6	6	6	6	6	6	6	6	6	6	6	6
P18510	IL1RN	Interleukin-1 receptor antagonist protein	IL1RA_HUMAN	1.05e-19	7	7	7	7	7	7	7	7	7	7	7	7	7	7	7	7	7	7	7	7	7	7	7	7	7	7	7	7	7	7	7	7	0	7	7	7	7	7	7	7	7	7	7	7	7
P18577;Q02161	RHCE;RHD	Blood group Rh(CE) polypeptide;Blood group Rh(D) polypeptide	RHCE_HUMAN;RHD_HUMAN	4.17e-12	0	0	0	0	0	0	0	0	0	0	0	0	0	0	0	0	0	0	0	0	0	0	0	0	0	0	0	0	0	0	0	0	0	0	0	2	0	0	0	0	0	0	0	0	0
P18621	RPL17	60S ribosomal protein L17	RL17_HUMAN	4.7e-10	2	0	2	0	0	0	0	0	0	2	0	0	2	2	2	0	0	0	2	0	0	0	0	2	2	2	2	2	2	2	2	0	0	2	2	2	0	0	2	0	0	0	2	0	2
P18669	PGAM1	Phosphoglycerate mutase 1	PGAM1_HUMAN	2.88e-24	13	13	13	13	13	13	13	13	13	13	13	13	13	13	13	13	13	13	13	0	0	13	13	13	13	13	13	13	13	13	13	13	0	13	13	13	13	13	13	13	13	13	13	13	13
P18827	SDC1	Syndecan-1	SDC1_HUMAN	6.47e-17	3	3	3	3	0	3	3	3	3	3	3	3	3	3	3	3	3	3	3	3	3	3	3	3	3	3	3	3	3	3	3	3	3	3	3	3	3	3	3	3	3	3	3	3	3
P19012	KRT15	Keratin, type I cytoskeletal 15	K1C15_HUMAN	4.72e-15	9	9	9	9	9	9	9	9	0	9	9	9	9	9	9	9	9	9	9	9	9	9	9	9	9	9	9	9	9	9	0	9	0	9	9	9	9	0	9	9	0	0	9	0	0
P19013	KRT4	Keratin, type II cytoskeletal 4	K2C4_HUMAN	5.98e-29	51	51	51	51	51	51	51	51	51	51	51	51	51	51	51	51	51	51	51	51	51	51	51	51	51	51	51	51	51	51	51	51	51	51	51	51	51	51	51	51	51	51	51	51	51
P19021	PAM	Peptidyl-glycine alpha-amidating monooxygenase	AMD_HUMAN	5.76e-22	17	17	17	17	17	17	17	17	17	17	17	17	17	17	17	17	17	17	17	17	17	17	17	17	17	17	17	17	17	17	17	17	17	17	17	17	17	17	17	17	17	17	17	17	17
P19022	CDH2	Cadherin-2	CADH2_HUMAN	1.45e-25	22	22	22	22	22	22	22	22	22	22	22	22	22	22	22	22	22	22	22	22	22	22	22	22	22	22	22	22	22	22	22	22	22	22	22	22	22	22	22	22	22	22	22	22	22
P19256	CD58	Lymphocyte function-associated antigen 3	LFA3_HUMAN	1.23e-13	5	5	5	5	5	5	5	5	5	5	5	5	5	5	5	5	5	5	5	5	5	5	5	5	5	5	5	5	5	5	5	5	5	5	5	5	5	5	5	5	5	5	5	5	5
P19320	VCAM1	Vascular cell adhesion protein 1	VCAM1_HUMAN	3.27e-26	27	27	27	27	27	27	27	27	27	27	27	27	27	27	27	27	27	27	27	27	27	27	27	27	27	27	27	27	27	27	27	27	27	27	27	27	27	27	27	27	27	27	27	27	27
P19338	NCL	Nucleolin	NUCL_HUMAN	2.78e-06	5	5	5	0	5	0	0	0	0	5	5	5	5	5	5	5	5	5	5	0	0	0	5	0	5	5	5	5	5	5	5	0	0	5	5	5	5	5	5	0	0	5	5	0	0
P19367	HK1	Hexokinase-1	HXK1_HUMAN	2.09e-20	6	6	6	6	0	6	0	0	0	6	6	6	6	6	6	0	0	0	6	0	0	0	6	6	6	6	6	6	6	6	6	6	0	6	6	6	6	6	6	6	6	6	6	6	6
P19404	NDUFV2	NADH dehydrogenase [ubiquinone] flavoprotein 2, mitochondrial	NDUV2_HUMAN	6.85e-17	3	3	3	3	3	3	0	0	0	3	3	3	3	3	3	0	0	0	3	0	0	3	3	3	3	3	3	3	3	3	0	0	0	0	3	3	3	3	0	3	0	0	3	0	3
P19438	TNFRSF1A	Tumor necrosis factor receptor superfamily member 1A	TNR1A_HUMAN	3.13e-17	7	7	7	7	7	7	7	7	7	7	7	7	7	7	7	7	7	7	7	7	7	7	7	7	7	7	7	7	7	7	7	7	7	7	7	7	7	7	7	7	7	7	7	7	7
P19440	GGT1	Glutathione hydrolase 1 proenzyme	GGT1_HUMAN	6.25e-29	14	14	14	14	14	14	14	14	14	14	14	14	14	14	14	14	14	14	14	14	14	14	14	14	14	14	14	14	14	14	14	14	14	14	14	14	14	14	14	14	14	14	14	14	14
P19623	SRM	Spermidine synthase	SPEE_HUMAN	1.69e-05	0	0	0	2	0	2	0	0	0	0	0	0	2	0	2	0	0	0	2	0	0	0	0	0	2	2	2	2	2	2	0	0	0	0	0	0	0	0	0	0	0	0	2	0	0
P19652	ORM2	Alpha-1-acid glycoprotein 2	A1AG2_HUMAN	3.4e-23	10	10	10	10	10	10	10	10	10	10	10	10	10	10	10	10	10	10	10	10	10	10	10	10	10	10	10	10	10	10	10	10	10	10	10	10	10	10	10	10	10	10	10	10	10
P19801	AOC1	Amiloride-sensitive amine oxidase [copper-containing]	AOC1_HUMAN	1.36e-25	25	25	25	25	25	25	0	0	0	25	25	25	25	25	25	25	25	25	25	0	0	25	25	25	25	25	25	25	25	25	25	25	25	25	25	25	25	25	25	25	25	25	25	25	25
P19823	ITIH2	Inter-alpha-trypsin inhibitor heavy chain H2	ITIH2_HUMAN	1.16e-21	22	22	22	22	22	22	0	22	0	22	22	22	22	22	22	22	22	22	22	0	0	22	22	22	22	22	22	22	22	22	22	22	0	22	22	22	22	22	22	22	22	22	22	22	22
P19827	ITIH1	Inter-alpha-trypsin inhibitor heavy chain H1	ITIH1_HUMAN	5.98e-28	17	17	17	17	17	17	17	17	17	17	17	17	17	17	17	17	17	17	17	17	0	17	17	17	17	17	17	17	17	17	17	17	17	17	17	17	17	17	17	17	17	17	17	17	17
P19835	CEL	Bile salt-activated lipase	CEL_HUMAN	1.4e-26	26	26	26	26	26	26	26	26	26	26	26	26	26	26	26	26	26	26	26	26	26	26	26	26	26	26	26	26	26	26	26	26	26	26	26	26	26	26	26	26	26	26	26	26	26
P19957	PI3	Elafin	ELAF_HUMAN	1.22e-18	12	12	12	12	12	12	12	12	12	12	12	12	12	12	12	12	12	12	12	12	12	12	12	12	12	12	12	12	12	12	12	12	12	12	12	12	12	12	12	12	12	12	12	12	12
P19961	AMY2B	Alpha-amylase 2B	AMY2B_HUMAN	5.94e-23	7	7	7	7	7	7	0	7	0	7	7	7	7	7	7	7	7	7	7	0	0	7	7	7	7	7	7	7	7	7	7	7	7	7	7	7	7	7	7	7	7	7	7	7	7
P19971	TYMP	Thymidine phosphorylase	TYPH_HUMAN	2.89e-18	11	11	11	11	11	11	11	11	11	11	11	11	11	11	11	11	11	11	11	11	11	11	11	11	11	11	11	11	11	11	11	11	11	11	11	11	11	11	11	11	11	11	11	11	11
P20036	HLA-DPA1	HLA class II histocompatibility antigen, DP alpha 1 chain	DPA1_HUMAN	2.82e-05	0	0	2	2	0	2	0	0	0	2	2	0	0	2	0	0	0	0	2	0	0	2	2	2	2	2	2	2	2	2	0	0	0	2	2	2	0	0	0	0	0	0	2	0	0
P20042	EIF2S2	Eukaryotic translation initiation factor 2 subunit 2	IF2B_HUMAN	1.66e-06	0	0	0	0	0	0	0	0	0	0	0	2	2	2	2	0	0	0	2	0	0	2	2	2	2	2	2	2	2	0	0	0	0	2	2	2	0	0	0	0	0	2	2	0	0
P20061	TCN1	Transcobalamin-1	TCO1_HUMAN	9.59e-17	8	8	8	8	0	8	8	8	8	8	8	8	8	8	8	0	8	8	8	8	8	8	8	8	8	8	8	8	8	8	8	8	8	8	8	8	8	0	8	8	0	8	8	0	8
P20062	TCN2	Transcobalamin-2	TCO2_HUMAN	1.56e-26	9	9	9	9	9	9	9	9	9	9	9	9	9	9	9	9	9	9	9	0	0	9	9	9	9	9	9	9	9	9	9	9	9	9	9	9	9	9	9	9	9	9	9	9	9
P20073	ANXA7	Annexin A7	ANXA7_HUMAN	2.87e-23	16	16	16	16	16	16	16	16	16	16	16	16	16	16	16	16	16	16	16	16	0	16	16	16	16	16	16	16	16	16	16	16	16	16	16	16	16	16	16	16	16	16	16	16	16
P20138	CD33	Myeloid cell surface antigen CD33	CD33_HUMAN	7.11e-22	8	8	8	8	8	8	8	8	8	8	8	8	8	8	8	8	8	8	8	8	8	8	8	8	8	8	8	8	8	8	8	8	0	8	8	8	8	8	8	8	8	8	8	8	8
P20142	PGC	Gastricsin	PEPC_HUMAN	1.1e-12	0	3	0	3	3	3	0	0	0	3	3	3	3	3	3	3	3	3	3	0	0	3	3	3	3	3	3	3	3	3	3	3	0	3	3	3	3	3	3	3	3	3	3	3	3
P20155	SPINK2	Serine protease inhibitor Kazal-type 2	ISK2_HUMAN	9.57e-13	0	0	0	0	0	0	0	0	0	0	0	0	0	0	0	0	0	0	0	0	0	0	0	0	0	0	0	0	0	0	0	0	0	2	2	0	0	0	0	2	2	2	0	2	2
P20160	AZU1	Azurocidin	CAP7_HUMAN	1.1e-18	5	5	5	5	5	5	5	5	5	5	5	5	5	5	5	5	5	5	5	5	5	5	5	5	5	5	5	5	5	5	5	5	5	5	5	5	5	5	5	5	5	5	5	5	5
P20333	TNFRSF1B	Tumor necrosis factor receptor superfamily member 1B	TNR1B_HUMAN	1.76e-17	6	6	6	6	6	6	6	6	6	6	6	6	6	6	6	6	6	6	6	6	6	6	6	6	6	6	6	6	6	6	6	6	6	6	6	6	6	6	6	6	6	6	6	6	6
P20340	RAB6A	Ras-related protein Rab-6A	RAB6A_HUMAN	3.27e-14	5	5	5	5	5	5	0	0	0	5	5	5	5	5	5	5	5	5	5	0	0	5	5	5	5	5	5	5	5	5	5	5	0	5	5	5	5	5	5	5	5	0	5	0	0
P20472	PVALB	Parvalbumin alpha	PRVA_HUMAN	1.75e-19	3	3	3	3	0	0	3	3	3	3	3	3	3	3	3	3	3	3	3	3	3	3	3	3	3	3	3	3	3	3	3	3	0	3	3	3	3	3	3	3	3	3	3	3	3
P20591	MX1	Interferon-induced GTP-binding protein Mx1	MX1_HUMAN	2.84e-21	0	13	0	0	13	13	0	0	0	13	13	13	13	13	13	0	0	0	13	0	0	13	0	0	13	13	13	13	13	13	0	13	0	13	0	0	0	0	0	13	0	0	0	0	0
P20618	PSMB1	Proteasome subunit beta type-1	PSB1_HUMAN	4.96e-16	6	6	6	6	6	6	6	0	0	6	6	6	6	6	6	6	6	6	6	6	0	6	6	6	6	6	6	6	6	6	6	6	0	6	6	6	6	6	6	6	6	6	6	6	6
P20674	COX5A	Cytochrome c oxidase subunit 5A, mitochondrial	COX5A_HUMAN	4.76e-15	2	2	2	2	2	2	0	0	0	2	2	2	2	2	2	0	0	2	2	0	2	2	2	2	2	2	2	2	2	2	0	0	0	2	2	2	2	2	2	0	0	0	2	0	0
P20700	LMNB1	Lamin-B1	LMNB1_HUMAN	6.58e-20	8	8	8	8	8	8	0	0	0	8	8	8	8	8	8	8	0	0	8	0	0	8	8	0	8	8	8	8	8	8	0	0	0	8	8	8	0	0	8	8	0	0	8	0	0
P20711	DDC	Aromatic-L-amino-acid decarboxylase	DDC_HUMAN	5.5e-27	18	18	18	18	18	18	0	18	18	18	18	18	18	18	18	18	18	18	18	0	0	18	18	18	18	18	18	18	18	18	18	18	18	18	18	18	18	18	18	18	18	18	18	18	18
P20742	PZP	Pregnancy zone protein	PZP_HUMAN	3.39e-12	0	0	5	5	5	5	0	0	0	5	5	5	5	5	5	0	0	0	5	0	0	5	0	0	5	5	5	5	5	0	0	0	0	0	5	0	5	0	5	0	0	0	5	0	0
P20774	OGN	Mimecan	MIME_HUMAN	2.17e-25	7	0	7	7	7	7	7	7	7	7	7	7	7	7	7	7	7	7	7	7	7	7	7	7	7	7	7	7	7	7	7	0	0	7	7	7	7	7	7	7	7	7	7	7	7
P20810	CAST	Calpastatin	ICAL_HUMAN	6.59e-27	18	18	18	18	18	18	18	18	18	18	18	18	18	18	18	18	18	18	18	18	18	18	18	18	18	18	18	18	18	18	18	18	18	18	18	18	18	18	18	18	18	18	18	18	18
P20827	EFNA1	Ephrin-A1	EFNA1_HUMAN	3.45e-16	7	7	7	7	7	7	7	7	7	7	7	7	7	7	7	7	7	7	7	7	7	7	7	7	7	7	7	7	7	7	7	7	7	7	7	7	7	7	7	7	7	7	7	7	7
P20851	C4BPB	C4b-binding protein beta chain	C4BPB_HUMAN	2.93e-17	4	4	4	0	0	0	4	4	4	4	4	4	4	4	4	4	4	0	4	4	4	4	4	4	4	4	4	4	4	4	4	4	0	4	4	4	4	4	4	4	4	4	4	4	4
P20916	MAG	Myelin-associated glycoprotein	MAG_HUMAN	5.77e-26	5	5	5	5	5	5	5	5	5	5	5	5	5	5	5	5	5	5	5	5	5	5	5	5	5	5	5	5	5	5	5	5	5	5	5	5	5	5	5	5	5	5	5	5	5
P20930	FLG	Filaggrin	FILA_HUMAN	6.26e-25	29	29	29	29	29	29	29	29	29	29	29	29	29	29	29	29	29	29	29	29	29	29	29	29	29	29	29	29	29	29	29	29	29	29	29	29	29	29	29	29	29	29	29	29	29
P20933	AGA	N(4)-(beta-N-acetylglucosaminyl)-L-asparaginase	ASPG_HUMAN	1.53e-23	9	9	9	9	9	9	9	9	9	9	9	9	9	9	9	9	9	9	9	9	9	9	9	9	9	9	9	9	9	9	9	9	9	9	9	9	9	9	9	9	9	9	9	9	9
P21128	ENDOU	Poly(U)-specific endoribonuclease	ENDOU_HUMAN	3.69e-20	10	10	10	10	10	10	0	0	10	10	10	10	10	10	10	10	10	10	10	10	10	10	10	10	10	10	10	10	10	10	10	10	0	10	10	10	10	0	10	0	0	0	10	0	10
P21217;P51993;Q11128	FUT3;FUT6;FUT5	Galactoside 3(4)-L-fucosyltransferase;Alpha-(1,3)-fucosyltransferase 6;Alpha-(1,3)-fucosyltransferase 5	FUT3_HUMAN;FUT6_HUMAN;FUT5_HUMAN	3.34e-14	0	0	0	2	0	2	0	0	0	2	2	2	2	2	2	0	0	0	2	0	0	0	0	0	2	2	2	2	2	2	0	0	0	2	2	2	2	0	2	2	2	2	2	2	2
P21266	GSTM3	Glutathione S-transferase Mu 3	GSTM3_HUMAN	9.3e-22	13	13	13	13	13	13	0	0	0	13	13	13	13	13	13	13	13	13	13	0	0	13	13	13	13	13	13	13	13	13	13	13	0	13	13	13	13	13	13	13	13	13	13	13	13
P21281	ATP6V1B2	V-type proton ATPase subunit B, brain isoform	VATB2_HUMAN	1.76e-20	10	10	10	10	10	10	0	10	0	10	10	10	10	10	10	10	10	10	10	0	0	10	10	10	10	10	10	10	10	10	0	10	0	10	10	10	10	10	10	10	10	10	10	10	10
P21333	FLNA	Filamin-A	FLNA_HUMAN	3.47e-27	50	50	50	50	50	50	50	50	50	50	50	50	50	50	50	50	50	50	50	50	50	50	50	50	50	50	50	50	50	50	50	50	50	50	50	50	50	50	50	50	50	50	50	50	50
P21399	ACO1	Cytoplasmic aconitate hydratase	ACOC_HUMAN	4.62e-28	16	16	16	16	16	16	0	0	0	16	16	16	16	16	16	16	16	16	16	0	0	16	16	16	16	16	16	16	16	16	16	16	0	16	16	16	16	16	16	16	16	16	16	16	16
P21554	CNR1	Cannabinoid receptor 1	CNR1_HUMAN	7.01e-10	2	2	2	0	2	0	2	2	2	2	2	2	2	2	2	2	2	2	2	2	2	2	2	2	2	2	2	2	2	2	2	2	2	2	2	2	2	2	2	2	2	2	2	2	2
P21583	KITLG	Kit ligand	SCF_HUMAN	6.82e-20	2	2	2	2	2	2	2	2	2	2	2	2	2	2	2	0	0	0	2	0	0	2	2	2	2	2	2	2	0	2	2	2	0	2	2	2	2	2	2	2	2	2	2	2	2
P21695	GPD1	Glycerol-3-phosphate dehydrogenase [NAD(+)], cytoplasmic	GPDA_HUMAN	1.35e-27	17	17	17	17	17	17	17	0	0	17	17	17	17	17	17	17	17	17	17	17	0	17	17	17	17	17	17	17	17	17	17	17	0	17	17	17	17	17	17	17	17	17	17	17	17
P21709	EPHA1	Ephrin type-A receptor 1	EPHA1_HUMAN	1.16e-21	9	9	9	9	9	9	9	9	9	9	9	9	9	9	9	9	9	9	9	9	9	9	9	9	9	9	9	9	9	9	9	9	9	9	9	9	9	9	9	9	9	9	9	9	9
P21757	MSR1	Macrophage scavenger receptor types I and II	MSRE_HUMAN	3.98e-20	2	2	2	2	2	2	2	2	2	2	2	2	2	2	2	2	2	2	2	2	2	2	2	2	2	2	2	0	0	2	2	2	0	2	0	2	0	0	2	2	0	0	2	2	0
P21796	VDAC1	Voltage-dependent anion-selective channel protein 1	VDAC1_HUMAN	4.71e-15	7	7	7	0	0	0	0	0	7	7	7	7	7	7	7	7	7	0	7	0	0	7	7	7	7	7	7	7	7	7	7	7	0	7	7	7	7	7	7	7	7	7	7	7	0
P21802	FGFR2	Fibroblast growth factor receptor 2	FGFR2_HUMAN	3.51e-25	5	5	5	5	5	5	5	5	5	5	5	5	5	5	5	5	5	5	5	5	5	5	5	5	5	5	5	5	5	5	5	5	5	5	5	5	5	5	5	5	5	5	5	5	5
P21810	BGN	Biglycan	PGS1_HUMAN	5.74e-22	13	13	13	13	13	13	13	13	13	13	13	13	13	13	13	13	13	13	13	13	13	13	13	13	13	13	13	13	13	13	13	13	13	13	13	13	13	13	13	13	13	13	13	13	13
P21926	CD9	CD9 antigen	CD9_HUMAN	4.94e-17	6	6	6	6	6	6	6	6	6	6	6	6	6	6	6	6	6	6	6	6	6	6	6	6	6	6	6	6	6	6	6	6	6	6	6	6	6	6	6	6	6	6	6	6	6
P21964	COMT	Catechol O-methyltransferase	COMT_HUMAN	5.96e-13	7	7	7	7	7	7	0	0	7	7	7	7	7	7	7	7	7	0	7	7	0	7	7	7	7	7	7	7	7	7	7	7	7	7	7	7	7	7	7	7	7	7	7	7	7
P21980	TGM2	Protein-glutamine gamma-glutamyltransferase 2	TGM2_HUMAN	3.23e-13	10	10	10	10	10	10	0	0	0	10	10	10	10	10	10	0	10	0	10	10	10	10	10	10	10	10	10	10	10	10	10	10	0	10	10	10	10	10	10	10	10	10	10	10	10
P22004	BMP6	Bone morphogenetic protein 6	BMP6_HUMAN	6.37e-19	2	2	2	2	2	2	0	0	0	2	2	2	2	2	2	0	0	0	2	0	0	2	2	2	2	2	2	2	2	2	2	2	0	2	2	2	2	2	2	2	0	2	2	0	0
P22061	PCMT1	Protein-L-isoaspartate(D-aspartate) O-methyltransferase	PIMT_HUMAN	1.39e-12	4	4	4	4	4	4	0	0	0	4	4	4	4	4	4	4	4	4	4	0	0	0	0	0	4	4	4	4	4	4	0	0	0	4	4	4	0	4	4	0	0	0	4	0	0
P22105	TNXB	Tenascin-X	TENX_HUMAN	3.46e-28	93	93	93	93	93	93	93	93	93	93	93	93	93	93	93	93	93	93	93	93	93	93	93	93	93	93	93	93	93	93	93	93	93	93	93	93	93	93	93	93	93	93	93	93	93
P22223	CDH3	Cadherin-3	CADH3_HUMAN	3.77e-26	12	12	12	12	12	12	12	12	12	12	12	12	12	12	12	12	12	12	12	12	12	12	12	12	12	12	12	12	12	12	12	12	12	12	12	12	12	12	12	12	12	12	12	12	12
P22234	PAICS	Multifunctional protein ADE2	PUR6_HUMAN	2.93e-19	7	0	7	0	0	7	0	0	0	7	7	7	7	7	7	7	7	0	7	0	0	0	7	0	7	7	7	7	7	7	0	7	0	7	7	7	7	7	7	7	7	7	7	7	7
P22304	IDS	Iduronate 2-sulfatase	IDS_HUMAN	2.51e-22	10	10	10	10	10	10	10	10	10	10	10	10	10	10	10	10	10	10	10	10	10	10	10	10	10	10	10	10	10	10	10	10	10	10	10	10	10	10	10	10	10	10	10	10	10
P22307	SCP2	Non-specific lipid-transfer protein	NLTP_HUMAN	3.91e-17	0	5	5	5	0	5	0	0	0	5	5	5	5	5	5	0	0	0	5	0	0	5	5	5	5	5	5	5	5	5	0	0	0	5	0	0	5	0	0	0	0	0	5	0	0
P22314	UBA1	Ubiquitin-like modifier-activating enzyme 1	UBA1_HUMAN	3.54e-24	21	21	21	21	21	21	0	21	0	21	21	21	21	21	21	21	21	21	21	0	0	21	21	21	21	21	21	21	21	21	21	21	0	21	21	21	21	21	21	21	21	21	21	21	21
P22352	GPX3	Glutathione peroxidase 3	GPX3_HUMAN	1.34e-21	7	7	7	7	7	7	7	7	7	7	7	7	7	7	7	7	7	7	7	7	7	7	7	7	7	7	7	7	7	7	7	7	7	7	7	7	7	7	7	7	7	7	7	7	7
P22392	NME2	Nucleoside diphosphate kinase B	NDKB_HUMAN	8.98e-19	14	14	14	14	14	14	14	14	14	14	14	14	14	14	14	14	14	14	14	0	14	14	14	14	14	14	14	14	14	14	14	14	0	14	14	14	14	14	14	14	14	14	14	14	14
P22455	FGFR4	Fibroblast growth factor receptor 4	FGFR4_HUMAN	3.13e-24	2	2	2	2	2	2	2	2	2	2	2	2	2	2	2	0	0	0	2	0	2	2	2	2	2	2	2	2	2	2	2	2	0	2	2	2	2	2	2	2	2	2	2	2	2
P22528	SPRR1B	Cornifin-B	SPR1B_HUMAN	3.01e-16	3	3	3	3	3	3	3	3	3	3	3	3	3	3	3	3	3	3	3	3	3	3	3	3	3	3	3	3	3	3	3	3	3	3	3	3	3	3	3	0	3	3	3	3	0
P22532	SPRR2D	Small proline-rich protein 2D	SPR2D_HUMAN	1.76e-17	2	2	2	2	0	0	2	2	2	2	0	2	2	2	2	0	2	2	2	0	0	2	2	0	2	2	2	2	2	2	2	2	2	2	2	2	0	0	0	0	2	0	2	0	0
P22607	FGFR3	Fibroblast growth factor receptor 3	FGFR3_HUMAN	4.44e-17	5	5	5	5	5	5	5	5	5	5	5	5	5	5	5	5	5	5	5	5	5	5	5	5	5	5	5	5	5	5	5	5	5	5	5	5	5	5	5	5	5	5	5	5	5
P22626	HNRNPA2B1	Heterogeneous nuclear ribonucleoproteins A2/B1	ROA2_HUMAN	1.76e-14	8	8	8	8	8	8	0	0	8	8	8	8	8	8	8	8	8	8	8	8	8	8	8	8	8	8	8	8	8	8	8	8	0	8	8	8	8	8	8	8	8	0	8	0	0
P22692	IGFBP4	Insulin-like growth factor-binding protein 4	IBP4_HUMAN	2.51e-18	6	6	6	6	6	6	6	6	6	6	6	6	6	6	6	6	6	6	6	6	6	6	6	6	6	6	6	6	6	6	6	6	6	6	6	6	6	6	6	6	6	6	6	6	6
P22695	UQCRC2	Cytochrome b-c1 complex subunit 2, mitochondrial	QCR2_HUMAN	7.17e-19	6	6	6	6	6	6	0	0	0	6	6	6	6	6	6	0	6	0	6	0	0	0	6	6	6	6	6	6	6	6	0	6	0	6	6	6	6	6	6	6	6	6	6	0	6
P22732	SLC2A5	Solute carrier family 2, facilitated glucose transporter member 5	GTR5_HUMAN	5.98e-29	5	5	5	5	5	5	0	0	0	5	5	5	5	5	5	5	5	5	5	0	0	5	5	5	5	5	5	5	5	5	5	5	0	5	5	5	5	5	5	5	5	5	5	5	5
P22735	TGM1	Protein-glutamine gamma-glutamyltransferase K	TGM1_HUMAN	2.62e-27	25	25	25	25	25	25	25	25	0	25	25	25	25	25	25	25	25	25	25	25	0	25	25	25	25	25	25	25	25	25	25	25	25	25	25	25	25	25	25	25	25	25	25	25	25
P22748	CA4	Carbonic anhydrase 4	CAH4_HUMAN	1.73e-14	8	8	8	8	8	8	8	8	0	8	8	8	8	8	8	8	8	8	8	8	8	8	8	8	8	8	8	8	8	8	8	8	8	8	8	8	8	8	8	8	8	8	8	8	8
P22792	CPN2	Carboxypeptidase N subunit 2	CPN2_HUMAN	1.38e-26	14	14	14	14	14	14	14	14	14	14	14	14	14	14	14	14	14	14	14	14	14	14	14	14	14	14	14	14	14	14	14	14	14	14	14	14	14	14	14	14	14	14	14	14	14
P22794	EVI2A	Protein EVI2A	EVI2A_HUMAN	1.7e-05	3	0	0	0	0	0	3	3	0	0	0	0	0	0	0	3	3	3	0	3	3	0	3	0	3	0	3	0	3	0	0	0	0	3	3	3	3	0	3	0	0	3	3	3	3
P22891	PROZ	Vitamin K-dependent protein Z	PROZ_HUMAN	1.72e-23	17	17	17	17	17	17	17	17	17	17	17	17	17	17	17	17	17	17	17	17	17	17	17	17	17	17	17	17	17	17	17	17	17	17	17	17	17	17	17	17	17	17	17	17	17
P22894	MMP8	Neutrophil collagenase	MMP8_HUMAN	9.36e-25	7	7	7	7	7	7	0	0	0	7	7	7	7	7	7	7	7	0	7	0	0	7	7	0	7	7	7	7	7	7	0	7	0	7	7	7	7	7	7	0	0	7	7	0	0
P22897	MRC1	Macrophage mannose receptor 1	MRC1_HUMAN	7.42e-16	3	3	3	3	3	3	3	3	0	3	3	3	3	3	0	3	3	3	3	3	0	3	3	3	3	3	3	3	3	3	3	3	0	3	3	3	3	3	3	3	3	3	3	3	3
P23083	IGHV1-2	Immunoglobulin heavy variable 1-2	HV102_HUMAN	1.62e-11	3	3	3	3	3	3	3	3	3	3	3	3	3	3	3	3	3	3	3	3	3	3	3	3	3	3	3	3	3	3	3	3	3	3	3	3	3	3	3	3	3	3	3	3	3
P23142	FBLN1	Fibulin-1	FBLN1_HUMAN	2.77e-26	18	18	18	18	18	18	18	18	18	18	18	18	18	18	18	18	18	18	18	18	18	18	18	18	18	18	18	18	18	18	18	18	18	18	18	18	18	18	18	18	18	18	18	18	18
P23229	ITGA6	Integrin alpha-6	ITA6_HUMAN	0.000235398	0	0	0	0	0	0	0	2	0	0	0	2	0	0	0	0	0	0	0	2	2	0	2	2	0	0	0	0	0	0	0	0	0	0	0	0	0	0	0	0	0	0	2	0	0
P23246	SFPQ	Splicing factor, proline- and glutamine-rich	SFPQ_HUMAN	4.29e-06	0	3	3	0	0	0	0	0	0	3	3	3	3	3	3	0	0	0	3	0	0	0	0	0	3	3	3	3	3	3	0	0	0	0	0	0	3	3	3	0	0	3	3	0	0
P23284	PPIB	Peptidyl-prolyl cis-trans isomerase B	PPIB_HUMAN	1.07e-18	15	15	15	15	15	15	15	0	15	15	15	15	15	15	15	15	15	15	15	15	15	15	15	15	15	15	15	15	15	15	15	15	15	15	15	15	15	15	15	15	15	15	15	15	15
P23327	HRC	Sarcoplasmic reticulum histidine-rich calcium-binding protein	SRCH_HUMAN	1.34e-09	3	3	3	3	3	3	3	3	3	3	3	3	3	3	3	3	3	3	3	3	3	3	3	3	3	3	3	3	3	3	3	3	3	3	3	3	3	3	3	3	3	3	3	3	3
P23381	WARS	Tryptophan--tRNA ligase, cytoplasmic	SYWC_HUMAN	1.82e-22	2	0	2	2	0	2	0	0	0	2	2	2	2	2	2	0	2	2	2	0	0	2	2	2	2	2	2	2	2	2	2	2	0	2	2	2	2	2	2	2	2	2	2	2	2
P23396	RPS3	40S ribosomal protein S3	RS3_HUMAN	1.63e-12	12	12	12	12	12	12	0	0	0	12	12	12	12	12	12	0	12	12	12	12	12	12	12	12	12	12	12	12	12	12	12	12	12	12	12	12	12	12	12	12	12	0	12	12	0
P23468	PTPRD	Receptor-type tyrosine-protein phosphatase delta	PTPRD_HUMAN	2.47e-20	6	6	6	0	6	6	6	6	6	6	6	6	6	6	6	6	6	6	6	6	6	6	6	6	6	6	6	6	6	6	6	6	6	6	6	6	6	6	6	6	6	6	6	6	6
P23470	PTPRG	Receptor-type tyrosine-protein phosphatase gamma	PTPRG_HUMAN	2.35e-23	10	10	10	10	10	10	10	10	10	10	10	10	10	10	10	10	10	10	10	10	10	10	10	10	10	10	10	10	10	10	10	10	0	10	10	10	10	10	10	10	10	10	10	10	10
P23471	PTPRZ1	Receptor-type tyrosine-protein phosphatase zeta	PTPRZ_HUMAN	1.01e-23	8	8	8	8	8	8	8	8	8	8	8	8	8	0	8	8	8	8	8	8	8	8	8	8	8	8	8	8	8	8	8	8	8	8	8	8	8	8	8	8	8	8	8	8	8
P23515	OMG	Oligodendrocyte-myelin glycoprotein	OMGP_HUMAN	3.84e-15	2	0	2	0	0	0	2	2	2	0	2	0	2	2	0	2	2	2	2	2	2	2	2	2	2	2	2	2	2	2	2	2	2	2	2	2	2	2	2	2	2	2	2	0	2
P23526	AHCY	Adenosylhomocysteinase	SAHH_HUMAN	1.08e-21	16	16	16	16	16	16	16	16	0	16	16	16	16	16	16	16	16	16	16	16	0	16	16	16	16	16	16	16	16	16	16	16	16	16	16	16	16	16	16	16	16	16	16	16	16
P23528	CFL1	Cofilin-1	COF1_HUMAN	3.18e-21	14	14	14	14	14	14	14	14	14	14	14	14	14	14	14	14	14	14	14	14	14	14	14	14	14	14	14	14	14	14	14	14	14	14	14	14	14	14	14	14	14	14	14	14	14
P23588	EIF4B	Eukaryotic translation initiation factor 4B	IF4B_HUMAN	3.83e-20	0	0	3	3	3	0	0	0	0	3	0	3	3	3	3	0	3	3	3	0	0	0	3	0	3	3	3	0	3	0	3	3	3	3	3	3	0	0	3	0	0	0	3	0	0
P24043	LAMA2	Laminin subunit alpha-2	LAMA2_HUMAN	9.41e-23	7	7	7	7	7	7	7	7	7	7	7	7	7	7	7	7	7	7	7	7	7	7	7	7	7	7	7	7	7	7	7	7	7	7	7	7	7	7	7	7	7	7	7	7	7
P24158	PRTN3	Myeloblastin	PRTN3_HUMAN	5.98e-29	7	7	7	7	7	7	7	7	7	7	7	7	7	7	7	7	7	7	7	7	0	7	7	7	7	7	7	7	7	7	7	7	0	7	7	7	7	7	7	7	7	7	7	7	7
P24298	GPT	Alanine aminotransferase 1	ALAT1_HUMAN	2.09e-20	8	8	8	8	8	8	0	0	0	8	8	8	8	8	8	8	8	8	8	0	0	8	8	8	8	8	8	8	8	8	8	8	0	8	8	8	8	8	8	8	8	0	8	0	0
P24394	IL4R	Interleukin-4 receptor subunit alpha	IL4RA_HUMAN	7.83e-13	2	2	2	2	2	0	2	2	0	2	2	2	0	2	2	2	2	2	2	2	2	2	2	2	2	2	2	2	2	2	2	2	2	2	2	2	2	2	2	2	2	2	2	2	0
P24530	EDNRB	Endothelin receptor type B	EDNRB_HUMAN	2.3e-21	2	2	2	2	2	2	2	2	2	2	2	2	0	0	0	2	2	2	2	2	2	2	2	2	2	2	2	2	2	2	2	2	2	2	2	2	2	0	2	2	0	2	2	2	2
P24534	EEF1B2	Elongation factor 1-beta	EF1B_HUMAN	2.27e-14	3	3	3	3	3	3	3	3	3	3	3	3	3	3	3	0	3	3	3	0	3	3	3	3	3	3	3	3	3	3	3	0	0	3	3	3	3	3	3	3	3	3	3	3	3
P24592	IGFBP6	Insulin-like growth factor-binding protein 6	IBP6_HUMAN	8.93e-17	5	5	5	5	5	5	5	0	5	5	5	5	5	5	5	5	5	5	5	5	5	5	5	5	5	5	5	5	5	5	5	5	5	5	5	5	5	5	5	5	5	5	5	5	5
P24593	IGFBP5	Insulin-like growth factor-binding protein 5	IBP5_HUMAN	7.77e-21	5	5	5	5	5	5	5	5	5	5	5	5	5	5	5	5	5	5	5	5	5	5	5	5	5	5	5	5	5	5	5	5	5	5	5	5	5	5	5	5	5	5	5	5	5
P24666	ACP1	Low molecular weight phosphotyrosine protein phosphatase	PPAC_HUMAN	1.23e-17	3	3	3	3	3	3	3	3	3	3	3	3	3	3	3	3	3	0	3	3	3	3	3	3	3	3	3	3	3	3	3	3	0	3	3	3	3	3	3	3	3	3	3	3	3
P24752	ACAT1	Acetyl-CoA acetyltransferase, mitochondrial	THIL_HUMAN	2.7e-16	4	4	4	4	4	4	0	0	0	4	4	4	4	4	4	0	4	4	4	0	0	4	4	4	4	4	4	4	4	4	0	0	0	4	4	4	4	4	4	4	4	4	4	0	0
P24821	TNC	Tenascin	TENA_HUMAN	4.9e-27	42	42	42	42	42	42	42	42	42	42	42	42	42	42	42	42	42	42	42	42	42	42	42	42	42	42	42	42	42	42	42	42	42	42	42	42	42	42	42	42	42	42	42	42	42
P24855	DNASE1	Deoxyribonuclease-1	DNAS1_HUMAN	6e-17	7	7	7	7	7	7	7	7	7	7	7	7	7	7	7	7	7	7	7	7	7	7	7	7	7	7	7	7	7	7	7	7	7	7	7	7	7	7	7	7	7	7	7	7	7
P25311	AZGP1	Zinc-alpha-2-glycoprotein	ZA2G_HUMAN	5.98e-29	27	27	27	27	27	27	27	27	27	27	27	27	27	27	27	27	27	27	27	27	27	27	27	27	27	27	27	27	27	27	27	27	27	27	27	27	27	27	27	27	27	27	27	27	27
P25325	MPST	3-mercaptopyruvate sulfurtransferase	THTM_HUMAN	1.83e-26	12	12	12	12	12	12	12	12	12	12	12	12	12	12	12	12	12	12	12	0	0	12	12	12	12	12	12	12	12	12	12	12	0	12	12	12	12	12	12	12	12	12	12	12	12
P25398	RPS12	40S ribosomal protein S12	RS12_HUMAN	7.51e-13	0	5	5	5	0	5	0	0	0	5	5	5	5	5	5	0	5	5	5	0	0	5	5	5	5	5	5	5	5	5	0	5	0	5	5	5	5	0	5	5	0	5	5	0	0
P25685	DNAJB1	DnaJ homolog subfamily B member 1	DNJB1_HUMAN	1.72e-15	0	0	6	6	0	6	0	0	0	0	6	6	6	6	6	6	6	0	6	0	0	6	0	0	6	6	6	6	6	6	0	0	0	6	6	6	0	0	0	6	0	0	6	0	0
P25705	ATP5F1A	ATP synthase subunit alpha, mitochondrial	ATPA_HUMAN	5.98e-29	12	12	12	12	12	12	0	0	0	12	12	12	12	12	12	12	12	12	12	0	0	12	12	12	12	12	12	12	12	12	12	12	0	12	12	12	12	12	12	12	12	12	12	12	12
P25774	CTSS	Cathepsin S	CATS_HUMAN	2.18e-23	8	8	8	8	8	8	8	8	8	8	8	8	8	8	8	8	8	8	8	0	0	8	8	8	8	8	8	8	8	8	8	8	0	8	8	8	8	8	8	8	8	8	8	8	8
P25786	PSMA1	Proteasome subunit alpha type-1	PSA1_HUMAN	8.08e-19	12	12	12	12	12	12	0	0	0	12	12	12	12	12	12	12	12	12	12	0	12	12	12	12	12	12	12	12	12	12	12	12	0	12	12	12	12	12	12	12	12	12	12	12	12
P25787	PSMA2	Proteasome subunit alpha type-2	PSA2_HUMAN	5.31e-26	5	5	0	5	5	5	0	5	0	5	5	5	5	5	5	5	5	5	5	0	0	5	5	5	5	5	5	5	5	5	0	0	0	5	5	5	5	5	5	5	0	0	5	5	0
P25788	PSMA3	Proteasome subunit alpha type-3	PSA3_HUMAN	2.89e-28	9	9	9	9	9	9	0	0	0	9	9	9	9	9	9	9	9	9	9	0	0	9	9	9	9	9	9	9	9	9	9	9	0	9	9	9	9	9	9	9	9	9	9	9	9
P25789	PSMA4	Proteasome subunit alpha type-4	PSA4_HUMAN	9.13e-20	8	8	8	8	8	8	8	0	8	8	8	8	8	8	8	8	8	8	8	8	8	8	8	8	8	8	8	8	8	8	8	8	8	8	8	8	8	8	8	8	8	8	8	8	8
P25815	S100P	Protein S100-P	S100P_HUMAN	7.64e-19	5	5	5	5	5	5	5	5	5	5	5	5	5	5	5	5	5	5	5	5	5	5	5	5	5	5	5	5	5	5	5	5	5	5	5	5	5	5	5	5	5	5	5	5	5
P25940	COL5A3	Collagen alpha-3(V) chain	CO5A3_HUMAN	7.57e-22	8	8	8	8	8	8	8	8	8	8	8	8	8	8	8	8	8	8	8	8	8	8	8	8	8	8	8	8	8	8	8	8	8	8	8	8	8	8	8	8	8	8	8	8	8
P25942	CD40	Tumor necrosis factor receptor superfamily member 5	TNR5_HUMAN	4.03e-15	6	6	6	6	6	6	6	6	6	6	6	6	6	6	6	6	6	6	6	6	6	6	6	6	6	6	6	6	6	6	6	6	6	6	6	6	6	6	6	6	6	6	6	6	6
P26038	MSN	Moesin	MOES_HUMAN	1.21e-20	26	26	26	26	26	26	26	26	26	26	26	26	26	26	26	26	26	26	26	26	26	26	26	26	26	26	26	26	26	26	26	26	26	26	26	26	26	26	26	26	26	26	26	26	26
P26368	U2AF2	Splicing factor U2AF 65 kDa subunit	U2AF2_HUMAN	9.37e-06	0	0	0	0	0	0	0	0	0	0	0	0	2	2	2	0	0	0	2	0	0	0	0	0	2	2	2	2	2	2	0	0	0	0	0	2	0	0	0	0	0	0	2	0	0
P26373	RPL13	60S ribosomal protein L13	RL13_HUMAN	1.13e-09	2	2	2	0	2	0	0	0	0	0	0	2	2	2	2	0	2	0	2	2	2	2	2	2	2	2	2	2	2	2	0	0	0	2	0	2	2	2	2	2	0	0	2	0	2
P26436	ACRV1	Acrosomal protein SP-10	ASPX_HUMAN	2.65e-18	0	0	0	0	0	0	3	0	0	3	0	0	0	3	3	3	0	0	0	0	3	0	0	0	0	3	3	0	3	0	0	3	0	0	3	0	3	3	0	3	3	3	0	3	3
P26447	S100A4	Protein S100-A4	S10A4_HUMAN	3.29e-15	6	6	6	6	6	6	6	6	6	6	6	6	6	6	6	6	6	6	6	6	6	6	6	6	6	6	6	6	6	6	6	6	0	6	6	6	6	6	6	6	6	6	6	6	6
P26572	MGAT1	Alpha-1,3-mannosyl-glycoprotein 2-beta-N-acetylglucosaminyltransferase	MGAT1_HUMAN	2.36e-09	0	2	0	0	0	0	2	2	2	2	2	2	2	0	2	2	2	2	2	2	2	2	2	2	2	2	2	2	2	2	2	2	2	2	0	2	2	2	2	2	0	2	2	2	2
P26583	HMGB2	High mobility group protein B2	HMGB2_HUMAN	5.19e-18	3	3	0	3	3	3	3	3	0	3	3	3	3	3	3	3	3	3	3	0	0	0	3	0	3	3	3	3	3	3	3	0	0	0	3	3	3	0	0	3	0	3	3	3	3
P26599	PTBP1	Polypyrimidine tract-binding protein 1	PTBP1_HUMAN	9.87e-12	5	0	5	5	0	0	0	0	0	5	5	5	5	5	5	0	5	0	5	0	0	5	0	0	5	5	5	5	5	5	5	0	0	5	0	0	0	5	0	5	0	0	5	0	0
P26639	TARS	Threonine--tRNA ligase, cytoplasmic	SYTC_HUMAN	4.36e-08	0	0	0	0	0	0	0	0	0	3	0	0	3	3	3	0	0	0	3	0	0	3	0	3	3	3	0	3	3	3	0	0	0	3	3	3	3	3	0	0	0	0	3	0	0
P26641	EEF1G	Elongation factor 1-gamma	EF1G_HUMAN	5.98e-29	12	12	12	12	12	12	0	0	0	12	12	12	12	12	12	12	12	12	12	0	0	12	12	12	12	12	12	12	12	12	0	12	0	12	12	12	12	12	12	12	12	12	12	12	12
P26718	KLRK1	NKG2-D type II integral membrane protein	NKG2D_HUMAN	6.15e-29	3	3	3	3	3	3	3	3	3	3	3	3	3	3	3	3	3	3	3	3	3	3	3	3	3	3	3	3	3	3	3	3	0	3	3	3	3	3	3	3	3	3	3	3	3
P26842	CD27	CD27 antigen	CD27_HUMAN	1.1e-24	9	9	9	9	9	9	9	9	9	9	9	9	9	9	9	9	9	9	9	9	9	9	9	9	9	9	9	9	9	9	9	9	9	9	9	9	9	9	9	9	9	9	9	9	9
P26927	MST1	Hepatocyte growth factor-like protein	HGFL_HUMAN	2.8e-28	18	18	18	18	18	18	18	18	18	18	18	18	18	18	18	18	18	18	18	18	18	18	18	18	18	18	18	18	18	18	18	18	18	18	18	18	18	18	18	18	18	18	18	18	18
P26992	CNTFR	Ciliary neurotrophic factor receptor subunit alpha	CNTFR_HUMAN	1.42e-19	10	10	10	10	10	10	10	10	10	10	10	10	10	10	10	10	10	10	10	10	10	10	10	10	10	10	10	10	10	10	10	10	10	10	10	10	10	10	10	10	10	10	10	10	10
P27105	STOM	Erythrocyte band 7 integral membrane protein	STOM_HUMAN	1.43e-19	9	9	9	9	0	9	9	9	9	9	9	9	9	9	9	9	9	9	9	0	0	0	9	9	9	9	9	9	9	9	9	9	0	9	9	9	9	9	9	9	9	9	9	9	9
P27169	PON1	Serum paraoxonase/arylesterase 1	PON1_HUMAN	4.46e-15	4	4	4	4	4	4	0	0	0	4	4	4	4	4	4	4	4	0	4	0	0	4	0	0	4	4	4	4	4	0	0	4	0	4	4	4	4	4	4	0	0	0	4	0	0
P27348	YWHAQ	14-3-3 protein theta	1433T_HUMAN	4.34e-17	6	6	6	6	6	6	6	6	0	6	6	6	6	6	6	6	6	6	6	0	0	6	6	0	6	6	6	6	6	6	6	6	0	6	6	6	6	6	6	6	6	6	6	6	6
P27482	CALML3	Calmodulin-like protein 3	CALL3_HUMAN	5.98e-29	15	15	15	15	15	15	15	15	15	15	15	15	15	15	15	15	15	15	15	15	15	15	15	15	15	15	15	15	15	15	15	15	15	15	15	15	15	15	15	15	15	15	15	15	15
P27487	DPP4	Dipeptidyl peptidase 4	DPP4_HUMAN	7.48e-24	34	34	34	34	34	34	34	34	34	34	34	34	34	34	34	34	34	34	34	34	34	34	34	34	34	34	34	34	34	34	34	34	34	34	34	34	34	34	34	34	34	34	34	34	34
P27797	CALR	Calreticulin	CALR_HUMAN	9.23e-21	12	12	12	12	12	12	12	12	12	12	12	12	12	12	12	12	12	12	12	12	12	12	12	12	12	12	12	12	12	12	12	12	12	12	12	12	12	12	12	12	12	12	12	12	12
P27816	MAP4	Microtubule-associated protein 4	MAP4_HUMAN	2.12e-19	4	4	4	0	0	4	4	4	0	4	4	4	4	4	4	4	4	4	4	0	0	4	4	4	4	4	4	4	4	4	4	4	0	4	4	4	4	4	4	4	0	4	4	0	0
P27824	CANX	Calnexin	CALX_HUMAN	4.46e-19	13	13	13	13	13	13	0	13	13	13	13	13	13	13	13	13	13	13	13	13	13	13	13	13	13	13	13	13	13	13	13	13	0	13	13	13	13	13	13	13	13	13	13	13	13
P27918	CFP	Properdin	PROP_HUMAN	3.72e-10	3	3	3	0	3	3	3	0	0	3	3	3	3	3	3	0	0	0	3	0	3	0	0	0	3	3	3	3	3	3	0	0	3	0	0	3	0	3	3	3	0	0	3	0	0
P27930	IL1R2	Interleukin-1 receptor type 2	IL1R2_HUMAN	3.79e-24	8	8	8	8	8	8	8	8	0	8	8	8	8	8	8	8	8	8	8	8	0	8	8	8	8	8	8	8	8	8	8	8	0	8	8	8	8	8	8	8	8	8	8	8	8
P28062	PSMB8	Proteasome subunit beta type-8	PSB8_HUMAN	1.17e-18	0	4	4	0	0	0	0	0	0	4	4	4	4	4	4	4	4	4	4	0	0	4	4	4	4	4	4	4	4	4	0	0	0	4	4	4	0	0	0	0	0	0	4	0	0
P28065	PSMB9	Proteasome subunit beta type-9	PSB9_HUMAN	1.83e-10	4	4	0	0	4	0	0	0	0	4	4	4	4	4	4	0	4	0	4	0	0	4	4	4	0	4	4	4	4	4	0	0	0	4	4	4	0	0	0	0	4	0	4	0	0
P28066	PSMA5	Proteasome subunit alpha type-5	PSA5_HUMAN	6.08e-22	10	10	10	10	10	10	10	10	0	10	10	10	10	10	10	10	10	10	10	0	0	10	10	10	10	10	10	10	10	10	10	10	0	10	10	10	10	10	10	10	10	10	10	10	10
P28070	PSMB4	Proteasome subunit beta type-4	PSB4_HUMAN	1.6e-19	0	0	0	0	0	6	0	0	0	6	6	6	6	6	6	6	6	6	6	0	0	6	6	6	6	6	6	6	6	6	0	0	0	6	6	6	6	0	6	6	6	6	6	6	6
P28072	PSMB6	Proteasome subunit beta type-6	PSB6_HUMAN	1.84e-19	3	3	3	3	3	3	3	3	0	3	3	3	3	3	3	3	3	3	3	3	3	3	3	3	3	3	3	3	3	3	3	3	0	3	3	3	3	3	3	3	3	3	3	3	3
P28074	PSMB5	Proteasome subunit beta type-5	PSB5_HUMAN	4.53e-26	6	6	6	6	6	6	0	0	0	6	6	6	6	6	6	6	6	6	6	0	0	6	0	0	6	6	6	6	6	6	0	0	0	6	6	6	6	6	6	6	0	0	6	0	0
P28161	GSTM2	Glutathione S-transferase Mu 2	GSTM2_HUMAN	6.55e-21	6	6	6	6	6	6	0	0	0	6	6	6	6	6	6	6	6	6	6	0	0	0	6	0	6	6	6	6	6	6	6	6	6	6	6	6	6	6	6	6	6	6	6	6	6
P28288	ABCD3	ATP-binding cassette sub-family D member 3	ABCD3_HUMAN	2.08e-10	0	0	0	4	0	0	0	4	4	4	4	0	4	4	4	0	0	0	0	0	0	4	4	0	0	4	0	4	4	0	0	0	0	4	0	0	4	4	0	0	0	0	4	0	0
P28332	ADH6	Alcohol dehydrogenase 6	ADH6_HUMAN	4.57e-14	3	3	3	3	3	3	0	3	3	3	3	3	3	3	3	3	3	3	3	0	0	3	3	3	3	3	3	3	3	3	3	3	0	3	3	3	3	3	3	3	3	3	3	3	0
P28482	MAPK1	Mitogen-activated protein kinase 1	MK01_HUMAN	2.74e-16	0	4	0	4	4	0	0	0	0	4	4	4	4	4	4	0	4	0	4	0	0	0	0	0	4	4	4	4	4	4	4	0	0	4	4	4	4	4	4	0	0	0	4	0	0
P28676	GCA	Grancalcin	GRAN_HUMAN	2.58e-16	8	8	8	8	8	8	8	8	8	8	8	8	8	8	8	8	8	0	8	0	0	8	8	8	8	8	8	8	8	8	8	8	0	8	8	8	8	8	8	8	8	8	8	8	8
P28799	GRN	Progranulin	GRN_HUMAN	1.81e-22	25	25	25	25	25	25	25	25	25	25	25	25	25	25	25	25	25	25	25	25	25	25	25	25	25	25	25	25	25	25	25	25	25	25	25	25	25	25	25	25	25	25	25	25	25
P28827	PTPRM	Receptor-type tyrosine-protein phosphatase mu	PTPRM_HUMAN	6.83e-21	6	6	6	6	6	6	0	0	6	6	6	6	6	6	6	6	6	6	6	0	0	6	6	6	6	6	6	6	6	6	6	6	0	6	6	6	6	6	6	6	6	0	6	6	6
P28838	LAP3	Cytosol aminopeptidase	AMPL_HUMAN	3.09e-21	11	11	11	11	11	11	11	11	0	11	11	11	11	11	11	11	11	11	11	11	11	11	11	11	11	11	11	11	11	11	0	11	0	11	11	11	11	11	11	11	11	11	11	0	11
P28906	CD34	Hematopoietic progenitor cell antigen CD34	CD34_HUMAN	2.97e-07	2	2	0	2	2	2	2	2	2	2	2	2	0	2	2	2	2	2	2	2	2	2	2	2	0	2	2	2	2	2	2	2	2	2	2	2	2	2	2	2	2	2	2	2	2
P28908	TNFRSF8	Tumor necrosis factor receptor superfamily member 8	TNR8_HUMAN	1.77e-19	10	10	10	10	10	10	10	10	10	10	10	10	10	10	10	10	10	10	10	10	10	10	10	10	10	10	10	10	10	10	10	10	10	10	10	10	10	10	10	10	10	10	10	10	10
P29034	S100A2	Protein S100-A2	S10A2_HUMAN	1.18e-19	4	4	4	4	4	4	4	4	4	4	4	4	4	4	4	4	4	4	4	0	0	4	4	4	4	4	4	4	4	4	4	4	4	4	4	4	4	4	4	0	0	0	4	0	0
P29144	TPP2	Tripeptidyl-peptidase 2	TPP2_HUMAN	2.1e-07	4	4	0	4	4	4	4	0	0	4	4	4	4	4	4	0	4	4	4	0	0	4	0	0	4	4	4	4	4	4	0	0	0	4	4	4	4	0	4	0	0	0	4	4	4
P29218	IMPA1	Inositol monophosphatase 1	IMPA1_HUMAN	2.61e-21	5	5	5	5	5	5	0	0	5	5	5	5	5	5	5	5	5	5	5	0	0	5	0	0	5	5	5	5	5	5	5	5	0	5	5	5	5	5	5	5	5	5	5	5	5
P29279	CTGF	Connective tissue growth factor	CTGF_HUMAN	1.03e-17	7	7	7	7	7	7	7	7	7	7	7	7	7	7	7	7	7	7	7	7	7	7	7	7	7	7	7	7	7	7	7	7	7	7	7	7	7	7	7	7	7	7	7	7	7
P29317	EPHA2	Ephrin type-A receptor 2	EPHA2_HUMAN	2.94e-25	2	2	2	2	2	2	2	2	2	2	2	2	2	2	2	2	2	2	2	2	2	2	2	2	2	2	2	2	2	2	2	2	0	2	2	2	2	2	2	2	2	0	2	2	0
P29323	EPHB2	Ephrin type-B receptor 2	EPHB2_HUMAN	1.55e-21	14	14	14	14	14	14	14	14	14	14	14	14	14	14	14	14	14	14	14	14	14	14	14	14	14	14	14	14	14	14	14	14	14	14	14	14	14	14	14	14	14	14	14	14	14
P29373	CRABP2	Cellular retinoic acid-binding protein 2	RABP2_HUMAN	5.01e-22	8	8	8	8	8	8	8	8	8	8	8	8	8	8	8	8	8	8	8	8	0	8	8	8	8	8	8	8	8	8	8	8	8	8	8	8	8	8	8	8	8	8	8	8	8
P29400	COL4A5	Collagen alpha-5(IV) chain	CO4A5_HUMAN	1.44e-15	3	3	3	3	3	3	3	0	0	3	3	3	3	3	3	3	3	3	3	0	0	3	3	3	3	3	3	3	3	3	3	3	3	3	3	3	3	3	3	0	0	3	3	3	3
P29401	TKT	Transketolase	TKT_HUMAN	8.25e-16	16	16	16	16	16	16	0	0	0	16	16	16	16	16	16	16	16	16	16	16	16	16	16	16	16	16	16	16	16	16	16	16	0	16	16	16	16	16	16	16	16	16	16	16	16
P29508	SERPINB3	Serpin B3	SPB3_HUMAN	1.49e-24	15	15	15	15	15	15	15	15	15	15	15	15	15	15	15	15	15	15	15	15	15	15	15	15	15	15	15	15	15	15	15	15	15	15	15	15	15	15	15	15	15	15	15	15	15
P29622	SERPINA4	Kallistatin	KAIN_HUMAN	7.02e-24	19	19	19	19	19	19	19	19	19	19	19	19	19	19	19	19	19	19	19	19	19	19	19	19	19	19	19	19	19	19	19	19	19	19	19	19	19	19	19	19	19	19	19	19	19
P29692	EEF1D	Elongation factor 1-delta	EF1D_HUMAN	2.8e-18	5	5	5	5	5	5	0	0	0	5	5	5	5	5	5	0	5	0	5	0	0	5	5	5	5	5	5	5	5	5	0	0	0	5	5	5	5	5	5	5	5	5	5	5	5
P29966	MARCKS	Myristoylated alanine-rich C-kinase substrate	MARCS_HUMAN	3.57e-18	7	7	7	7	7	7	7	7	7	7	7	7	7	7	7	7	7	7	7	7	7	7	7	7	7	7	7	7	7	7	7	7	7	7	7	7	7	7	7	7	7	7	7	7	7
P29972	AQP1	Aquaporin-1	AQP1_HUMAN	4.91e-06	0	0	0	0	0	0	0	0	0	2	0	2	0	0	0	2	2	2	2	0	0	0	0	0	2	0	2	0	0	2	2	2	0	2	0	0	2	2	2	0	0	0	2	0	0
P29992	GNA11	Guanine nucleotide-binding protein subunit alpha-11	GNA11_HUMAN	2e-25	3	3	3	3	3	3	0	0	0	3	3	3	3	3	3	3	3	3	3	0	0	3	3	0	3	3	3	3	3	3	3	3	0	3	3	3	3	3	3	3	3	3	3	3	3
P30038	ALDH4A1	Delta-1-pyrroline-5-carboxylate dehydrogenase, mitochondrial	AL4A1_HUMAN	9.48e-14	0	0	0	0	0	0	0	0	0	3	3	0	3	3	3	0	0	0	3	0	0	0	0	0	3	3	3	3	0	3	0	0	0	0	0	0	3	3	3	0	0	0	3	0	0
P30039	PBLD	Phenazine biosynthesis-like domain-containing protein	PBLD_HUMAN	3.46e-21	14	14	14	14	14	14	0	0	0	14	14	14	14	14	14	14	14	14	14	0	0	14	14	14	14	14	14	14	14	14	14	14	0	14	14	14	14	14	14	14	14	14	14	14	14
P30040	ERP29	Endoplasmic reticulum resident protein 29	ERP29_HUMAN	1.8e-21	5	5	5	5	5	5	0	0	0	5	5	5	5	5	5	0	0	0	5	0	0	5	5	5	5	5	5	5	5	5	0	0	0	5	5	5	5	5	5	5	5	5	5	5	5
P30041	PRDX6	Peroxiredoxin-6	PRDX6_HUMAN	4.14e-24	18	18	18	18	18	18	18	18	18	18	18	18	18	18	18	18	18	18	18	18	18	18	18	18	18	18	18	18	18	18	18	18	18	18	18	18	18	18	18	18	18	18	18	18	18
P30043	BLVRB	Flavin reductase (NADPH)	BLVRB_HUMAN	5.89e-28	9	9	9	9	9	9	9	9	9	9	9	9	9	9	9	9	9	9	9	0	9	9	9	9	9	9	9	9	9	9	9	9	0	9	9	9	9	9	9	9	9	9	9	9	9
P30044	PRDX5	Peroxiredoxin-5, mitochondrial	PRDX5_HUMAN	3.79e-21	8	8	8	8	8	8	8	8	8	8	8	8	8	8	8	8	8	8	8	8	0	8	8	8	8	8	8	8	8	8	8	8	0	8	8	8	8	8	8	8	8	8	8	8	8
P30046	DDT	D-dopachrome decarboxylase	DOPD_HUMAN	1.83e-21	7	7	7	7	7	7	7	7	0	7	7	7	7	7	7	7	7	7	7	0	0	7	7	7	7	7	7	7	7	7	7	7	7	7	7	7	7	7	7	7	7	7	7	7	7
P30047	GCHFR	GTP cyclohydrolase 1 feedback regulatory protein	GFRP_HUMAN	3.76e-19	5	5	5	5	5	5	5	5	5	5	5	5	5	5	5	5	5	5	5	0	0	5	5	5	5	5	5	5	5	5	5	5	0	5	5	5	5	5	5	5	5	5	5	5	5
P30048	PRDX3	Thioredoxin-dependent peroxide reductase, mitochondrial	PRDX3_HUMAN	1.05e-19	6	6	6	6	6	6	0	0	0	6	6	6	6	6	6	6	6	6	6	0	0	6	6	6	6	6	6	6	6	6	6	6	0	6	6	6	6	6	6	6	6	6	6	6	6
P30049	ATP5F1D	ATP synthase subunit delta, mitochondrial	ATPD_HUMAN	7.5e-13	2	2	2	2	2	2	0	0	0	2	0	2	2	2	2	0	0	2	2	0	0	2	2	2	2	2	2	2	2	2	0	0	0	2	0	2	0	0	2	2	0	2	0	0	2
P30050	RPL12	60S ribosomal protein L12	RL12_HUMAN	1.26e-14	4	4	4	4	0	0	0	0	0	4	4	4	4	4	4	4	4	4	4	0	0	4	4	4	4	4	4	4	4	4	4	4	0	4	4	4	4	4	4	4	4	4	4	4	4
P30084	ECHS1	Enoyl-CoA hydratase, mitochondrial	ECHM_HUMAN	1.75e-23	4	4	4	4	4	4	0	0	0	4	4	4	4	4	4	0	0	0	4	0	0	4	4	4	4	4	4	4	4	4	4	4	0	4	4	4	4	4	4	4	4	0	4	4	4
P30085	CMPK1	UMP-CMP kinase	KCY_HUMAN	3.86e-14	7	7	7	7	7	7	7	7	0	7	7	7	7	7	7	7	7	7	7	7	7	7	7	7	7	7	7	7	7	7	7	7	0	7	7	7	7	7	7	7	7	7	7	7	7
P30086	PEBP1	Phosphatidylethanolamine-binding protein 1	PEBP1_HUMAN	5.98e-29	13	13	13	13	13	13	13	13	13	13	13	13	13	13	13	13	13	13	13	13	13	13	13	13	13	13	13	13	13	13	13	13	13	13	13	13	13	13	13	13	13	13	13	13	13
P30101	PDIA3	Protein disulfide-isomerase A3	PDIA3_HUMAN	3.36e-27	20	20	20	20	20	20	20	0	0	20	20	20	20	20	20	20	20	20	20	20	20	20	20	20	20	20	20	20	20	20	20	20	20	20	20	20	20	20	20	20	20	20	20	20	20
P30153	PPP2R1A	Serine/threonine-protein phosphatase 2A 65 kDa regulatory subunit A alpha isoform	2AAA_HUMAN	5.98e-29	15	15	15	15	15	15	0	0	0	15	15	15	15	15	15	15	15	15	15	0	0	15	0	15	15	15	15	15	15	15	15	15	0	15	15	15	15	15	15	15	15	15	15	15	15
P30510	HLA-C	HLA class I histocompatibility antigen, Cw-14 alpha chain	1C14_HUMAN	1.75e-14	4	4	4	4	4	0	4	4	0	4	4	4	4	4	4	4	4	4	4	0	4	4	4	4	4	4	4	4	4	4	4	4	4	4	0	4	4	4	4	4	0	0	4	0	0
P30530	AXL	Tyrosine-protein kinase receptor UFO	UFO_HUMAN	2.87e-19	7	7	7	7	7	7	7	7	7	7	7	7	7	7	7	7	7	7	7	7	7	7	7	7	7	7	7	7	7	7	7	7	7	7	7	7	7	7	7	7	7	7	7	7	7
P30613	PKLR	Pyruvate kinase PKLR	KPYR_HUMAN	1.13e-24	15	15	15	15	15	15	15	15	15	15	15	15	15	15	15	15	15	15	15	0	15	15	15	15	15	15	15	15	15	15	15	15	15	15	15	15	15	15	15	15	15	15	15	15	15
P30622	CLIP1	CAP-Gly domain-containing linker protein 1	CLIP1_HUMAN	5.78e-08	5	5	5	0	0	0	0	0	0	0	0	0	5	5	5	0	0	0	5	0	0	0	0	0	0	5	5	5	5	5	0	0	0	0	0	0	0	0	0	0	0	0	5	0	0
P30626	SRI	Sorcin	SORCN_HUMAN	9.88e-20	8	8	8	8	8	8	8	8	8	8	8	8	8	8	8	8	8	8	8	8	8	8	8	8	8	8	8	8	8	8	8	8	0	8	8	8	8	8	8	8	8	8	8	8	8
P30740	SERPINB1	Leukocyte elastase inhibitor	ILEU_HUMAN	4.25e-28	21	21	21	21	21	21	21	21	21	21	21	21	21	21	21	21	21	21	21	21	21	21	21	21	21	21	21	21	21	21	21	21	21	21	21	21	21	21	21	21	21	0	21	21	21
P30838	ALDH3A1	Aldehyde dehydrogenase, dimeric NADP-preferring	AL3A1_HUMAN	1.57e-15	3	0	0	0	0	0	0	0	0	3	3	3	3	3	3	0	0	0	3	0	0	0	0	0	3	3	3	3	3	3	0	0	0	0	0	3	3	0	3	0	0	0	3	0	0
P31025	LCN1	Lipocalin-1	LCN1_HUMAN	6.2e-25	9	9	9	9	9	9	9	9	9	9	9	9	9	9	9	9	9	9	9	9	9	9	9	9	9	9	9	9	9	9	9	9	9	9	9	9	9	9	9	9	9	9	9	9	9
P31146	CORO1A	Coronin-1A	COR1A_HUMAN	5.17e-17	9	9	9	9	9	9	9	9	9	9	9	9	9	9	9	9	9	9	9	0	9	9	9	9	9	9	9	9	9	9	9	9	0	9	9	9	9	0	9	9	9	9	9	9	9
P31150	GDI1	Rab GDP dissociation inhibitor alpha	GDIA_HUMAN	4.08e-13	2	2	2	2	2	2	0	0	0	2	2	2	2	2	2	2	2	2	2	0	0	2	2	2	2	2	2	2	2	2	2	0	0	2	2	2	2	2	2	0	0	2	2	0	0
P31151	S100A7	Protein S100-A7	S10A7_HUMAN	7.31e-17	6	6	6	6	6	6	6	6	6	6	6	6	6	6	6	6	6	6	6	6	6	6	6	6	6	6	6	6	6	6	6	6	6	6	6	6	6	6	6	6	6	6	6	6	6
P31431	SDC4	Syndecan-4	SDC4_HUMAN	4.66e-21	6	6	6	0	6	0	6	6	6	6	6	6	6	6	6	6	6	6	6	6	6	6	6	6	6	6	6	6	6	6	6	6	6	6	6	6	6	6	6	6	6	6	6	6	6
P31689	DNAJA1	DnaJ homolog subfamily A member 1	DNJA1_HUMAN	6.55e-09	2	2	2	0	2	2	2	2	2	2	2	2	2	2	2	2	2	2	2	2	2	2	2	2	2	2	2	2	2	2	2	2	0	2	2	2	2	2	2	2	2	0	2	2	2
P31930	UQCRC1	Cytochrome b-c1 complex subunit 1, mitochondrial	QCR1_HUMAN	2.57e-09	6	6	6	6	6	6	0	0	0	6	6	6	6	6	6	0	0	0	6	0	0	6	6	6	6	6	0	6	6	6	0	6	0	6	6	6	6	0	6	6	0	0	6	6	6
P31939	ATIC	Bifunctional purine biosynthesis protein PURH	PUR9_HUMAN	1.6e-22	4	4	4	4	4	4	0	0	0	4	4	4	4	4	4	4	4	4	4	0	0	4	0	0	4	4	4	4	4	4	4	4	0	4	4	4	4	4	4	4	4	4	4	4	0
P31943	HNRNPH1	Heterogeneous nuclear ribonucleoprotein H	HNRH1_HUMAN	2.14e-22	0	3	0	0	3	3	0	0	0	3	3	0	3	3	3	3	3	3	3	3	3	3	3	3	3	3	3	3	3	3	0	3	0	3	3	3	3	0	3	0	0	0	3	0	0
P31944	CASP14	Caspase-14	CASPE_HUMAN	3.1e-26	23	23	23	23	23	23	23	23	23	23	23	23	23	23	23	23	23	23	23	23	23	23	23	23	23	23	23	23	23	23	23	23	23	23	23	23	23	23	23	23	23	23	23	23	23
P31946	YWHAB	14-3-3 protein beta/alpha	1433B_HUMAN	1.86e-18	11	11	11	11	11	11	11	11	11	11	11	11	11	11	11	11	11	11	11	11	11	11	11	11	11	11	11	11	11	11	11	11	11	11	11	11	11	11	11	11	11	11	11	11	11
P31947	SFN	14-3-3 protein sigma	1433S_HUMAN	5.98e-29	12	12	12	12	12	12	12	12	0	12	12	12	12	12	12	12	12	12	12	0	0	12	12	12	12	12	12	12	12	12	12	0	0	12	12	12	12	12	12	0	0	0	12	0	12
P31948	STIP1	Stress-induced-phosphoprotein 1	STIP1_HUMAN	5.29e-12	11	11	11	11	11	11	11	11	0	11	11	11	11	11	11	11	11	11	11	11	0	11	11	11	11	11	11	11	11	11	11	11	11	11	11	11	11	11	11	11	11	11	11	11	11
P31949	S100A11	Protein S100-A11	S10AB_HUMAN	7.51e-27	6	6	6	6	6	6	6	6	6	6	6	6	6	6	6	6	6	6	6	6	6	6	6	6	6	6	6	6	6	6	6	6	6	6	6	6	6	6	6	6	6	6	6	6	6
P31997	CEACAM8	Carcinoembryonic antigen-related cell adhesion molecule 8	CEAM8_HUMAN	6.2e-25	4	4	4	4	4	4	4	4	4	4	4	4	4	4	4	4	4	4	4	4	4	4	4	4	4	4	4	4	4	4	4	4	4	4	4	4	4	4	4	4	4	4	4	4	4
P32004	L1CAM	Neural cell adhesion molecule L1	L1CAM_HUMAN	5.98e-29	21	21	21	21	21	21	21	21	21	21	21	21	21	21	21	21	21	21	21	21	21	21	21	21	21	21	21	21	21	21	21	21	21	21	21	21	21	21	21	21	21	21	21	21	21
P32119	PRDX2	Peroxiredoxin-2	PRDX2_HUMAN	5.37e-23	15	15	15	15	15	15	15	15	15	15	15	15	15	15	15	15	15	15	15	15	15	15	15	15	15	15	15	15	15	15	15	15	15	15	15	15	15	15	15	15	15	15	15	15	15
P32189	GK	Glycerol kinase	GLPK_HUMAN	2.74e-18	6	6	6	6	6	6	0	0	0	6	6	6	6	6	6	6	6	6	6	0	0	0	6	0	6	6	6	6	6	6	0	6	0	6	6	6	6	6	6	6	0	0	6	0	0
P32241	VIPR1	Vasoactive intestinal polypeptide receptor 1	VIPR1_HUMAN	3.72e-23	4	4	4	4	4	4	4	4	4	4	4	4	4	4	4	4	0	4	4	4	4	4	4	4	4	4	4	4	4	4	4	4	0	4	4	4	4	4	4	4	4	4	4	4	4
P32320	CDA	Cytidine deaminase	CDD_HUMAN	1.56e-17	6	6	6	6	6	6	6	6	6	6	6	6	6	6	6	6	6	6	6	0	0	6	6	6	6	6	6	6	6	6	6	6	0	6	6	6	6	6	6	6	6	0	6	6	0
P32455	GBP1	Guanylate-binding protein 1	GBP1_HUMAN	2.72e-09	2	2	2	2	2	2	0	0	0	2	2	2	2	2	2	2	2	2	2	0	0	0	2	2	2	2	2	2	2	2	2	2	2	2	2	2	2	2	2	0	2	2	2	2	2
P32754	HPD	4-hydroxyphenylpyruvate dioxygenase	HPPD_HUMAN	1.66e-27	8	8	8	8	8	8	0	0	0	8	8	8	8	8	8	8	8	8	8	0	0	8	8	8	8	8	8	8	8	8	8	8	0	8	8	8	8	8	8	8	8	8	8	0	8
P32926	DSG3	Desmoglein-3	DSG3_HUMAN	1.59e-27	24	24	24	24	24	24	24	24	24	24	24	24	24	24	24	24	24	24	24	24	24	24	24	24	24	24	24	24	24	24	24	24	24	24	24	24	24	24	24	24	24	24	24	24	0
P32929	CTH	Cystathionine gamma-lyase	CGL_HUMAN	1.04e-15	0	0	0	5	5	5	0	0	0	5	0	5	5	5	5	0	0	0	5	0	0	0	0	0	5	5	5	0	5	5	5	5	0	5	5	5	5	5	5	0	0	0	5	0	0
P32942	ICAM3	Intercellular adhesion molecule 3	ICAM3_HUMAN	9.9e-15	4	4	4	4	4	4	4	4	4	4	4	4	4	4	4	4	4	4	4	4	4	4	4	4	4	4	4	4	4	4	4	4	4	4	4	4	4	4	4	4	4	4	4	4	4
P32969	RPL9	60S ribosomal protein L9	RL9_HUMAN	1.65e-08	0	2	0	2	0	0	0	0	0	2	0	0	2	2	2	0	2	2	0	0	0	0	2	2	0	2	0	2	0	0	0	0	0	0	0	2	0	0	0	0	0	0	2	0	0
P33151	CDH5	Cadherin-5	CADH5_HUMAN	1.05e-24	10	10	10	10	10	10	10	10	10	10	10	10	10	10	10	10	10	10	10	10	10	10	10	10	10	10	10	10	10	10	10	10	10	10	10	10	10	10	10	10	10	10	10	10	10
P33241	LSP1	Lymphocyte-specific protein 1	LSP1_HUMAN	8.84e-07	2	2	0	2	0	2	0	0	0	2	2	2	0	2	2	2	0	0	2	0	2	0	0	2	2	2	2	0	2	2	0	0	0	2	2	2	0	0	0	0	0	0	2	0	2
P33908	MAN1A1	Mannosyl-oligosaccharide 1,2-alpha-mannosidase IA	MA1A1_HUMAN	5.89e-28	26	26	26	26	26	26	26	26	26	26	26	26	26	26	26	26	26	26	26	26	26	26	26	26	26	26	26	26	26	26	26	26	26	26	26	26	26	26	26	26	26	26	26	26	26
P34059	GALNS	N-acetylgalactosamine-6-sulfatase	GALNS_HUMAN	1.45e-24	18	18	18	18	18	18	0	0	0	18	18	18	18	18	18	18	18	18	18	0	0	18	18	18	18	18	18	18	18	18	18	18	0	18	18	18	18	18	18	18	18	18	18	18	18
P34096	RNASE4	Ribonuclease 4	RNAS4_HUMAN	1.91e-15	3	3	3	3	3	3	0	0	0	3	3	3	3	3	3	3	3	3	3	0	0	3	3	3	3	3	3	3	3	3	3	0	0	3	3	0	3	3	3	3	3	3	3	3	3
P34741	SDC2	Syndecan-2	SDC2_HUMAN	7.23e-08	3	0	3	0	0	0	3	3	3	0	0	0	3	0	3	3	3	3	3	3	3	0	3	3	3	3	3	0	0	3	3	0	0	3	3	3	3	3	3	0	0	0	3	0	0
P34896	SHMT1	Serine hydroxymethyltransferase, cytosolic	GLYC_HUMAN	1.98e-28	19	19	19	19	19	19	0	19	0	19	19	19	19	19	19	19	19	19	19	0	0	19	19	19	19	19	19	19	19	19	19	19	19	19	19	19	19	19	19	19	19	19	19	19	19
P34913	EPHX2	Bifunctional epoxide hydrolase 2	HYES_HUMAN	1.64e-24	9	9	9	9	9	9	0	0	0	9	9	9	9	9	9	9	9	9	9	0	0	0	0	9	9	9	9	9	9	9	9	9	0	9	9	9	9	9	9	9	9	9	9	9	9
P34932	HSPA4	Heat shock 70 kDa protein 4	HSP74_HUMAN	1.26e-18	9	9	9	9	9	9	9	0	0	9	9	9	9	9	9	9	9	9	9	0	0	9	9	9	9	9	9	9	9	9	9	0	0	9	9	9	9	9	9	9	9	9	9	9	0
P35052	GPC1	Glypican-1	GPC1_HUMAN	4.82e-22	12	12	12	12	12	12	12	12	12	12	12	12	12	12	12	12	12	12	12	12	12	12	12	12	12	12	12	12	12	12	12	12	12	12	12	12	12	12	12	12	12	12	12	12	12
P35221	CTNNA1	Catenin alpha-1	CTNA1_HUMAN	2.83e-18	18	18	18	18	18	18	0	0	0	18	18	18	18	18	18	18	18	18	18	0	0	18	18	18	18	18	18	18	18	18	18	18	0	18	18	18	18	18	18	18	0	0	18	0	18
P35222	CTNNB1	Catenin beta-1	CTNB1_HUMAN	3.97e-11	0	0	3	3	0	0	0	0	0	0	0	0	3	3	3	3	0	0	3	0	0	0	3	0	3	3	3	3	3	3	0	0	0	3	3	3	3	3	3	0	3	0	3	0	0
P35232	PHB	Prohibitin	PHB_HUMAN	4.95e-16	3	3	3	3	3	3	0	0	0	3	3	0	3	3	3	0	3	0	0	0	0	3	0	0	3	3	3	3	3	3	0	0	0	3	3	3	3	3	3	0	0	0	3	0	0
P35237	SERPINB6	Serpin B6	SPB6_HUMAN	5.62e-24	7	7	7	7	7	7	7	7	7	7	7	7	7	7	7	7	7	7	7	7	7	7	7	7	7	7	7	7	7	7	7	7	0	7	7	7	7	7	7	7	7	7	7	7	7
P35241	RDX	Radixin	RADI_HUMAN	4.99e-27	21	21	21	21	21	21	21	21	21	21	21	21	21	21	21	21	21	21	21	21	21	21	21	21	21	21	21	21	21	21	21	21	21	21	21	21	21	21	21	21	21	21	21	21	21
P35268	RPL22	60S ribosomal protein L22	RL22_HUMAN	1.25e-24	2	2	2	0	0	0	0	0	0	2	2	2	2	2	2	2	2	2	2	2	0	2	2	2	2	2	2	2	2	2	2	2	0	2	2	2	2	2	2	0	0	0	2	0	0
P35270	SPR	Sepiapterin reductase	SPRE_HUMAN	1.16e-12	3	3	3	3	3	3	0	0	0	3	3	3	3	3	3	0	3	0	3	0	0	3	0	3	3	3	3	3	3	3	0	0	0	3	3	3	3	0	3	3	3	3	3	3	3
P35318	ADM	ADM	ADML_HUMAN	4.7e-22	4	4	4	0	0	0	4	4	4	4	4	4	4	4	4	4	4	4	4	4	4	4	4	4	4	4	4	4	4	4	4	4	4	4	4	4	4	4	4	4	4	4	4	4	4
P35321	SPRR1A	Cornifin-A	SPR1A_HUMAN	6.45e-17	7	7	7	7	7	7	7	7	7	7	7	7	7	7	7	7	7	7	7	7	7	7	7	7	7	7	7	7	7	7	7	7	7	7	7	7	7	7	7	0	7	7	7	7	7
P35325	SPRR2B	Small proline-rich protein 2B	SPR2B_HUMAN	1.29e-17	6	6	6	6	6	6	6	6	6	6	6	6	6	6	6	6	6	6	6	6	6	6	6	6	6	6	6	6	6	6	6	6	6	6	6	6	6	6	6	0	0	0	6	0	0
P35442	THBS2	Thrombospondin-2	TSP2_HUMAN	7.19e-17	3	0	0	0	0	0	3	3	3	3	3	3	3	3	3	3	3	3	3	3	3	3	3	3	3	3	3	3	3	3	3	3	3	3	3	3	3	3	3	3	3	3	3	3	3
P35443	THBS4	Thrombospondin-4	TSP4_HUMAN	3.05e-22	11	11	11	11	11	11	11	11	11	11	11	11	11	11	11	11	11	11	11	11	11	11	11	11	11	11	11	11	11	11	11	11	11	11	11	11	11	11	11	11	11	11	11	11	11
P35475	IDUA	Alpha-L-iduronidase	IDUA_HUMAN	1.43e-15	5	5	5	5	5	5	0	0	0	5	5	5	5	5	5	5	5	5	5	0	0	0	5	5	5	5	5	5	5	5	5	5	0	5	5	5	5	5	5	0	5	0	5	5	0
P35527	KRT9	Keratin, type I cytoskeletal 9	K1C9_HUMAN	3.05e-22	36	36	36	36	36	36	36	36	36	36	36	36	36	36	36	36	36	36	36	36	36	36	36	36	36	36	36	36	36	36	36	36	36	36	36	36	36	36	36	36	36	36	36	36	36
P35542	SAA4	Serum amyloid A-4 protein	SAA4_HUMAN	7.34e-17	3	0	0	3	3	3	3	3	0	3	3	3	3	3	3	3	3	3	3	3	0	3	3	3	3	3	3	0	3	3	0	3	0	3	3	3	3	3	0	3	0	0	0	3	0
P35555	FBN1	Fibrillin-1	FBN1_HUMAN	3.23e-25	75	75	75	75	75	75	75	75	75	75	75	75	75	75	75	75	75	75	75	75	75	75	75	75	75	75	75	75	75	75	75	75	75	75	75	75	75	75	75	75	75	75	75	75	75
P35558	PCK1	Phosphoenolpyruvate carboxykinase, cytosolic [GTP]	PCKGC_HUMAN	5.98e-29	16	16	16	16	16	16	0	0	0	16	16	16	16	16	16	16	16	16	16	16	16	16	16	16	16	16	16	16	16	16	16	16	16	16	16	16	16	16	16	16	16	16	16	16	16
P35579	MYH9	Myosin-9	MYH9_HUMAN	5.84e-26	56	56	56	56	56	56	56	56	56	56	56	56	56	56	56	56	56	56	56	56	56	56	56	56	56	56	56	56	56	56	56	56	56	56	56	56	56	56	56	56	56	56	56	56	56
P35580	MYH10	Myosin-10	MYH10_HUMAN	1.81e-18	11	11	11	11	11	11	11	11	11	11	11	11	11	11	11	11	11	11	11	11	11	11	11	0	11	11	11	11	11	11	11	11	0	11	11	11	11	11	11	11	11	11	11	11	11
P35606	COPB2	Coatomer subunit beta'	COPB2_HUMAN	1.83e-19	9	9	9	9	9	9	0	0	0	9	9	9	9	9	9	9	9	9	9	0	0	9	9	9	9	9	9	9	9	9	9	0	0	9	9	9	9	9	9	9	0	0	9	0	0
P35611	ADD1	Alpha-adducin	ADDA_HUMAN	3.82e-06	3	3	3	3	3	0	0	0	3	3	3	3	3	3	3	3	3	3	3	3	3	3	3	3	0	3	3	3	3	3	3	3	3	3	3	3	3	3	3	3	0	3	3	0	3
P35612	ADD2	Beta-adducin	ADDB_HUMAN	3.17e-09	0	0	0	0	0	0	0	0	0	0	0	0	0	0	0	0	0	0	0	0	0	0	0	0	0	0	0	0	0	0	0	0	0	0	0	0	3	0	0	3	0	0	3	0	0
P35613	BSG	Basigin	BASI_HUMAN	4.6e-20	9	9	9	9	9	9	9	9	9	9	9	9	9	9	9	9	9	9	9	9	9	9	9	9	9	9	9	9	9	9	9	9	9	9	9	9	9	9	9	9	9	9	9	9	9
P35625	TIMP3	Metalloproteinase inhibitor 3	TIMP3_HUMAN	9.96e-19	0	2	0	0	0	0	2	2	2	2	2	2	2	2	2	2	2	2	2	2	2	2	2	2	2	2	2	0	0	0	2	2	0	2	2	2	2	2	2	2	2	2	2	2	2
P35754	GLRX	Glutaredoxin-1	GLRX1_HUMAN	9.85e-21	3	3	3	3	3	3	3	3	3	3	3	3	3	3	3	3	3	3	3	3	3	3	3	3	3	3	3	3	3	3	3	3	3	3	3	3	3	3	3	3	3	3	3	3	3
P35858	IGFALS	Insulin-like growth factor-binding protein complex acid labile subunit	ALS_HUMAN	2.9e-27	17	17	17	17	17	17	17	17	17	17	17	17	17	17	17	17	17	17	17	17	17	17	17	17	17	17	17	17	17	17	17	17	17	17	17	17	17	17	17	17	17	17	17	17	17
P35908	KRT2	Keratin, type II cytoskeletal 2 epidermal	K22E_HUMAN	1.78e-19	43	43	43	43	43	43	43	43	43	43	43	43	43	43	43	43	43	43	43	43	43	43	43	43	43	43	43	43	43	43	43	43	43	43	43	43	43	43	43	43	43	43	43	43	43
P35968	KDR	Vascular endothelial growth factor receptor 2	VGFR2_HUMAN	1.36e-14	2	2	2	2	0	0	0	2	2	2	2	2	2	2	2	0	0	0	2	0	0	2	2	0	2	2	2	2	2	2	2	2	0	2	2	2	0	2	0	0	0	0	2	0	0
P35998	PSMC2	26S proteasome regulatory subunit 7	PRS7_HUMAN	3.01e-17	4	4	4	4	0	0	0	0	0	4	4	4	4	4	4	0	0	0	4	0	0	0	0	0	4	4	4	4	4	4	0	0	0	4	4	4	4	4	4	4	0	0	4	4	4
P36222	CHI3L1	Chitinase-3-like protein 1	CH3L1_HUMAN	1.94e-14	0	7	7	7	0	0	0	0	0	7	7	7	7	7	7	7	7	7	7	0	0	7	7	7	7	7	7	7	7	7	7	0	0	7	7	7	7	7	7	0	0	0	7	0	0
P36405	ARL3	ADP-ribosylation factor-like protein 3	ARL3_HUMAN	3.93e-23	4	4	4	4	4	4	0	0	0	4	4	4	4	4	4	4	4	4	4	0	0	4	4	4	4	4	4	4	4	4	0	4	0	4	4	4	4	4	4	4	4	4	4	4	4
P36507	MAP2K2	Dual specificity mitogen-activated protein kinase kinase 2	MP2K2_HUMAN	1.39e-07	3	3	3	3	3	3	0	0	0	3	3	3	3	3	3	3	3	3	3	0	0	3	3	0	3	3	3	3	3	3	3	3	0	3	3	3	3	3	3	0	3	0	3	0	3
P36543	ATP6V1E1	V-type proton ATPase subunit E 1	VATE1_HUMAN	7.38e-23	6	6	6	6	6	6	6	6	6	6	6	6	6	6	6	6	6	6	6	0	0	6	6	6	6	6	6	6	6	6	6	6	0	6	6	6	6	6	6	6	6	6	6	6	6
P36551	CPOX	Oxygen-dependent coproporphyrinogen-III oxidase, mitochondrial	HEM6_HUMAN	1.53e-11	3	3	3	0	3	3	0	0	0	3	3	3	3	3	3	0	0	0	3	0	0	0	3	3	3	3	3	3	3	3	0	0	0	3	3	3	0	3	0	0	0	0	3	0	0
P36578	RPL4	60S ribosomal protein L4	RL4_HUMAN	1.48e-11	8	8	0	8	0	8	0	0	0	8	0	0	8	8	8	0	0	8	8	0	0	8	0	0	8	8	8	8	8	8	0	8	0	8	8	8	8	8	8	8	0	0	8	0	0
P36639	NUDT1	7,8-dihydro-8-oxoguanine triphosphatase	8ODP_HUMAN	7.86e-20	2	2	2	2	2	2	2	2	2	2	2	2	2	2	2	2	2	2	2	0	0	2	2	2	2	2	2	2	2	2	2	2	0	2	2	2	2	2	2	2	0	2	2	0	0
P36871	PGM1	Phosphoglucomutase-1	PGM1_HUMAN	5.16e-21	12	12	12	12	12	12	0	0	0	12	12	12	12	12	12	12	12	12	12	0	0	0	0	12	12	12	12	12	12	12	12	12	0	12	12	12	12	12	12	12	12	12	12	12	12
P36896	ACVR1B	Activin receptor type-1B	ACV1B_HUMAN	3.11e-16	4	4	4	4	4	4	4	4	4	4	4	4	4	4	4	4	4	4	4	4	4	4	4	4	4	4	4	4	4	4	4	4	4	4	4	4	4	4	4	4	4	4	4	4	4
P36897	TGFBR1	TGF-beta receptor type-1	TGFR1_HUMAN	1.16e-18	3	3	3	3	3	3	3	3	3	3	3	3	3	3	3	3	3	3	3	3	3	3	3	3	3	3	3	3	3	3	3	3	3	3	3	3	3	3	3	3	3	3	3	3	3
P36952	SERPINB5	Serpin B5	SPB5_HUMAN	1.29e-17	12	12	12	12	12	12	0	0	0	12	12	12	12	12	12	12	12	12	12	0	0	12	12	12	12	12	12	12	12	12	0	0	0	12	12	12	12	12	0	12	0	12	12	12	0
P36955	SERPINF1	Pigment epithelium-derived factor	PEDF_HUMAN	3.7e-24	13	13	13	13	13	13	0	0	0	13	13	13	13	13	13	13	13	13	13	13	13	13	13	13	13	13	13	13	13	13	13	13	13	13	13	13	13	13	13	13	13	13	13	13	13
P36957	DLST	Dihydrolipoyllysine-residue succinyltransferase component of 2-oxoglutarate dehydrogenase complex, mitochondrial	ODO2_HUMAN	1.66e-23	11	11	11	11	11	11	11	11	11	11	11	11	11	11	11	11	11	11	11	11	11	11	11	11	11	11	11	11	11	11	11	11	11	11	11	11	11	11	11	11	11	11	11	11	11
P36959	GMPR	GMP reductase 1	GMPR1_HUMAN	1.42e-05	2	0	0	0	0	2	0	0	0	2	0	0	0	2	2	0	0	2	2	0	0	0	0	0	0	0	0	0	2	0	0	0	0	2	0	2	0	2	0	0	0	0	0	0	0
P36969	GPX4	Phospholipid hydroperoxide glutathione peroxidase	GPX4_HUMAN	8.73e-27	0	4	4	0	4	0	0	0	0	4	4	4	4	4	4	4	4	4	4	0	0	4	4	4	4	4	4	4	4	4	4	4	0	4	4	4	4	4	4	4	4	4	4	4	4
P36980	CFHR2	Complement factor H-related protein 2	FHR2_HUMAN	1.24e-21	3	3	3	3	3	3	3	3	3	3	3	3	3	3	3	3	3	3	3	3	3	3	3	3	3	3	3	3	3	3	0	3	0	3	3	3	3	3	3	3	3	3	3	3	3
P37173	TGFBR2	TGF-beta receptor type-2	TGFR2_HUMAN	2.68e-16	2	2	2	2	2	2	2	2	2	2	2	2	2	2	2	2	2	2	2	2	2	2	2	2	2	2	2	2	2	2	2	2	2	2	2	2	2	2	2	2	2	2	2	2	2
P37802	TAGLN2	Transgelin-2	TAGL2_HUMAN	8.44e-23	11	11	11	11	11	11	11	11	11	11	11	11	11	11	11	11	11	11	11	11	0	11	11	11	11	11	11	11	11	11	11	11	0	11	11	11	11	11	11	11	11	11	11	11	11
P37837	TALDO1	Transaldolase	TALDO_HUMAN	3.63e-18	14	14	14	14	14	14	0	14	0	14	14	14	14	14	14	14	14	14	14	0	0	14	14	14	14	14	14	14	14	14	14	14	0	14	14	14	14	14	14	14	14	14	14	14	14
P37840	SNCA	Alpha-synuclein	SYUA_HUMAN	2.81e-21	9	9	9	9	9	9	9	0	0	9	9	9	9	9	9	9	0	9	9	0	0	9	9	0	9	9	9	9	9	9	9	9	9	9	9	9	0	0	9	9	9	9	9	9	9
P38571	LIPA	Lysosomal acid lipase/cholesteryl ester hydrolase	LICH_HUMAN	1.04e-21	3	3	3	3	3	3	0	0	0	3	3	3	3	3	3	3	3	0	3	0	0	0	0	0	3	3	3	3	3	3	3	3	0	3	3	3	3	3	3	3	3	3	3	3	3
P38606	ATP6V1A	V-type proton ATPase catalytic subunit A	VATA_HUMAN	9.92e-20	20	20	20	20	20	20	0	0	0	20	20	20	20	20	20	20	20	20	20	0	0	20	20	20	20	20	20	20	20	20	20	20	20	20	20	20	20	20	20	20	20	20	20	20	20
P38646	HSPA9	Stress-70 protein, mitochondrial	GRP75_HUMAN	1.76e-23	8	8	8	8	8	8	8	8	0	8	8	8	8	8	8	8	8	8	8	8	0	8	8	8	8	8	8	8	8	8	8	8	0	8	8	8	8	8	8	8	8	0	8	8	8
P39023	RPL3	60S ribosomal protein L3	RL3_HUMAN	4.97e-13	0	5	5	5	0	0	0	0	0	5	5	0	5	5	5	0	0	0	5	0	0	5	5	0	5	5	5	5	5	5	5	0	0	5	5	5	5	5	5	5	5	5	5	5	5
P39059	COL15A1	Collagen alpha-1(XV) chain	COFA1_HUMAN	2.32e-21	10	10	10	10	10	10	10	10	10	10	10	10	10	10	10	10	10	10	10	10	10	10	10	10	10	10	10	10	10	10	10	10	10	10	10	10	10	10	10	10	10	10	10	10	10
P39060	COL18A1	Collagen alpha-1(XVIII) chain	COIA1_HUMAN	1.54e-25	20	20	20	20	20	20	20	20	20	20	20	20	20	20	20	20	20	20	20	20	20	20	20	20	20	20	20	20	20	20	20	20	20	20	20	20	20	20	20	20	20	20	20	20	20
P39656	DDOST	Dolichyl-diphosphooligosaccharide--protein glycosyltransferase 48 kDa subunit	OST48_HUMAN	3.36e-21	5	5	5	5	5	5	0	0	0	5	5	5	5	5	5	5	0	5	5	0	0	5	0	5	5	5	5	5	5	5	0	0	0	5	5	5	5	5	5	5	5	5	5	5	5
P40121	CAPG	Macrophage-capping protein	CAPG_HUMAN	1.7e-19	10	10	10	10	10	10	10	10	10	10	10	10	10	10	10	10	10	10	10	10	10	10	10	10	10	10	10	10	10	10	10	10	10	10	10	10	10	10	10	10	10	10	10	10	10
P40189	IL6ST	Interleukin-6 receptor subunit beta	IL6RB_HUMAN	2.7e-21	14	14	14	14	14	14	14	14	14	14	14	14	14	14	14	14	14	14	14	14	14	14	14	14	14	14	14	14	14	14	14	14	14	14	14	14	14	14	14	14	14	14	14	14	14
P40197	GP5	Platelet glycoprotein V	GPV_HUMAN	2.63e-19	0	8	8	8	8	8	8	0	8	8	8	8	8	8	8	8	8	8	8	0	0	0	8	0	8	8	8	8	8	8	8	8	0	8	8	8	8	8	8	8	0	0	8	0	0
P40199	CEACAM6	Carcinoembryonic antigen-related cell adhesion molecule 6	CEAM6_HUMAN	9.94e-23	4	4	4	4	4	4	4	4	4	4	4	4	4	4	4	4	4	4	4	4	4	4	4	4	4	4	4	4	4	4	4	4	4	4	4	4	4	4	4	4	4	4	4	4	4
P40227	CCT6A	T-complex protein 1 subunit zeta	TCPZ_HUMAN	4.06e-13	9	9	9	9	9	9	9	9	9	9	9	9	9	9	9	9	9	9	9	0	0	9	9	0	9	9	9	9	9	9	0	0	9	9	9	9	9	9	9	9	9	9	9	9	9
P40429	RPL13A	60S ribosomal protein L13a	RL13A_HUMAN	1.04e-13	0	0	2	0	0	0	0	0	0	0	0	0	2	2	2	0	2	0	2	0	0	0	0	0	2	2	0	2	2	0	0	0	0	2	0	0	0	0	2	0	0	0	2	0	0
P40925	MDH1	Malate dehydrogenase, cytoplasmic	MDHC_HUMAN	1.8e-22	10	10	10	10	10	10	10	10	10	10	10	10	10	10	10	10	10	10	10	10	10	10	10	10	10	10	10	10	10	10	10	10	10	10	10	10	10	10	10	10	10	10	10	10	10
P40926	MDH2	Malate dehydrogenase, mitochondrial	MDHM_HUMAN	4.41e-24	17	17	17	17	17	17	0	17	0	17	17	17	17	17	17	17	17	17	17	0	0	17	17	17	17	17	17	17	17	17	17	17	0	17	17	17	17	17	17	17	17	17	17	17	17
P40939	HADHA	Trifunctional enzyme subunit alpha, mitochondrial	ECHA_HUMAN	7.03e-12	4	4	4	0	0	0	0	0	0	4	0	4	4	4	4	0	4	0	4	0	0	4	4	4	4	4	4	4	4	4	0	4	0	4	4	4	4	4	4	4	4	4	4	4	4
P41091;Q2VIR3	EIF2S3;EIF2S3B	Eukaryotic translation initiation factor 2 subunit 3;Eukaryotic translation initiation factor 2 subunit 3B	IF2G_HUMAN;IF2GL_HUMAN	2.26e-21	0	0	3	0	0	3	0	0	0	0	3	0	3	3	3	0	0	0	3	0	0	0	0	0	3	3	3	3	3	3	0	0	0	0	3	3	3	3	3	0	0	0	3	0	0
P41181	AQP2	Aquaporin-2	AQP2_HUMAN	1.49e-26	4	4	4	4	4	4	4	4	4	4	4	4	4	4	4	4	4	4	4	0	4	4	4	4	4	4	4	4	4	4	4	4	4	4	4	4	4	4	4	4	4	4	4	4	4
P41217	CD200	OX-2 membrane glycoprotein	OX2G_HUMAN	1.99e-22	5	5	5	5	5	5	5	5	5	5	5	5	5	5	5	5	5	5	5	5	5	5	5	5	5	5	5	5	5	5	5	5	5	5	5	5	5	5	5	5	5	5	5	5	5
P41218	MNDA	Myeloid cell nuclear differentiation antigen	MNDA_HUMAN	4.01e-14	8	8	8	8	0	0	0	0	0	8	8	8	8	8	8	0	0	0	8	0	0	0	0	0	8	8	8	8	8	8	0	0	0	8	0	8	0	0	0	8	8	0	8	0	0
P41222	PTGDS	Prostaglandin-H2 D-isomerase	PTGDS_HUMAN	8.94e-14	10	10	10	10	10	10	10	10	10	10	10	10	10	10	10	10	10	10	10	10	10	10	10	10	10	10	10	10	10	10	10	10	10	10	10	10	10	10	10	10	10	10	10	10	10
P41240	CSK	Tyrosine-protein kinase CSK	CSK_HUMAN	1.81e-09	0	0	0	0	0	0	0	0	0	3	3	0	3	3	3	0	0	0	3	0	0	0	0	0	3	3	3	3	3	3	0	0	0	0	0	0	3	0	0	0	0	0	3	0	0
P41250	GARS	Glycine--tRNA ligase	GARS_HUMAN	1.7e-06	0	0	0	2	0	2	0	0	0	2	0	0	2	2	2	0	2	0	2	0	0	2	0	0	2	2	0	2	2	2	0	0	0	2	2	2	2	0	0	0	2	2	2	0	0
P41271	NBL1	Neuroblastoma suppressor of tumorigenicity 1	NBL1_HUMAN	4.3e-16	3	3	3	3	3	3	3	3	3	3	3	3	3	3	3	3	3	3	3	3	3	3	3	3	3	3	3	3	3	3	3	3	3	3	3	3	3	3	3	3	3	3	3	3	3
P42126	ECI1	Enoyl-CoA delta isomerase 1, mitochondrial	ECI1_HUMAN	2.11e-19	5	5	5	5	5	5	0	0	0	5	5	5	5	5	5	5	5	0	5	0	0	0	5	0	5	5	5	5	5	5	5	0	0	5	5	5	5	5	5	5	0	5	5	5	5
P42167	TMPO	Lamina-associated polypeptide 2, isoforms beta/gamma	LAP2B_HUMAN	4.09e-21	2	0	0	2	0	2	0	0	0	2	2	2	2	0	2	0	0	0	2	0	0	0	0	0	2	2	2	2	2	2	0	2	0	2	2	0	2	0	0	0	0	0	2	0	0
P42224	STAT1	Signal transducer and activator of transcription 1-alpha/beta	STAT1_HUMAN	1.78e-18	4	0	0	0	0	0	0	0	0	0	0	0	4	4	4	0	0	4	4	0	0	0	0	0	4	0	4	4	4	4	4	0	0	4	4	4	4	4	4	0	0	0	4	0	0
P42330	AKR1C3	Aldo-keto reductase family 1 member C3	AK1C3_HUMAN	5.75e-18	9	9	9	9	9	9	0	9	0	9	9	9	9	9	9	9	9	9	9	9	9	9	9	9	9	9	9	9	9	9	9	9	9	9	9	9	9	9	9	9	9	9	9	9	9
P42357	HAL	Histidine ammonia-lyase	HUTH_HUMAN	1.86e-09	5	5	0	5	0	5	0	0	0	5	5	0	5	5	5	5	5	5	5	0	0	0	0	0	5	0	0	5	5	5	5	5	0	5	5	5	0	0	0	5	0	0	0	0	0
P42566	EPS15	Epidermal growth factor receptor substrate 15	EPS15_HUMAN	6.69e-07	0	0	0	0	0	0	0	0	0	0	2	2	2	2	2	2	0	0	2	0	0	0	0	0	2	2	2	2	2	2	0	0	0	2	0	0	0	0	0	0	0	0	0	0	0
P42685	FRK	Tyrosine-protein kinase FRK	FRK_HUMAN	4.36e-21	7	7	7	7	7	7	0	0	0	7	7	7	7	7	7	7	7	7	7	0	0	7	7	0	7	7	7	7	7	7	7	7	0	7	7	7	7	7	7	7	7	7	7	7	7
P42702	LIFR	Leukemia inhibitory factor receptor	LIFR_HUMAN	2.15e-16	6	6	6	6	6	6	6	6	0	6	6	6	6	6	6	6	6	6	6	0	0	6	6	6	6	6	6	6	6	6	6	6	6	6	6	6	6	6	6	6	6	6	6	6	6
P42766	RPL35	60S ribosomal protein L35	RL35_HUMAN	3.09e-10	0	0	2	2	2	0	0	0	0	0	2	0	2	2	2	2	2	0	0	0	0	0	0	0	2	2	2	2	2	2	0	0	0	2	2	2	2	0	0	0	0	0	0	0	0
P42785	PRCP	Lysosomal Pro-X carboxypeptidase	PCP_HUMAN	5.71e-25	20	20	20	20	20	20	20	20	20	20	20	20	20	20	20	20	20	20	20	20	0	20	20	20	20	20	20	20	20	20	20	20	20	20	20	20	20	20	20	20	20	20	20	20	20
P43034	PAFAH1B1	Platelet-activating factor acetylhydrolase IB subunit alpha	LIS1_HUMAN	6.85e-06	0	0	0	0	0	5	0	0	0	0	5	0	5	5	5	0	0	0	5	0	0	0	0	0	5	5	0	5	5	5	0	0	0	5	5	5	5	5	5	0	0	0	0	0	0
P43121	MCAM	Cell surface glycoprotein MUC18	MUC18_HUMAN	1.48e-21	20	20	20	20	20	20	20	20	20	20	20	20	20	20	20	20	20	20	20	20	20	20	20	20	20	20	20	20	20	20	20	20	20	20	20	20	20	20	20	20	20	20	20	20	20
P43251	BTD	Biotinidase	BTD_HUMAN	5.98e-29	14	14	14	14	14	14	0	14	0	14	14	14	14	14	14	14	14	14	14	0	0	14	14	14	14	14	14	14	14	14	14	14	14	14	14	14	14	14	14	14	14	14	14	14	14
P43490	NAMPT	Nicotinamide phosphoribosyltransferase	NAMPT_HUMAN	5.23e-17	17	17	17	17	17	17	0	0	0	17	17	17	17	17	17	0	17	17	17	0	0	0	17	0	17	17	17	17	17	17	0	17	0	17	17	17	17	17	17	0	0	17	17	0	17
P43626;Q14953	KIR2DL1;KIR2DS5	Killer cell immunoglobulin-like receptor 2DL1;Killer cell immunoglobulin-like receptor 2DS5	KI2L1_HUMAN;KI2S5_HUMAN	2.01e-09	4	4	4	4	4	4	0	0	0	4	4	4	4	4	4	4	4	4	4	4	0	4	4	4	4	4	4	4	4	4	4	0	4	4	4	4	4	4	4	4	0	4	4	4	0
P43652	AFM	Afamin	AFAM_HUMAN	2.81e-22	30	30	30	30	30	30	30	30	30	30	30	30	30	30	30	30	30	30	30	30	30	30	30	30	30	30	30	30	30	30	30	30	30	30	30	30	30	30	30	30	30	30	30	30	30
P43686	PSMC4	26S proteasome regulatory subunit 6B	PRS6B_HUMAN	1.68e-17	4	4	4	4	4	0	0	4	0	4	4	4	4	4	4	4	4	4	4	4	4	4	4	4	4	4	4	4	4	4	4	4	0	4	4	4	4	4	4	4	4	4	4	4	4
P45381	ASPA	Aspartoacylase	ACY2_HUMAN	2.02e-06	0	0	0	0	0	0	0	0	0	0	2	2	2	2	2	0	0	0	2	0	0	2	2	0	2	2	2	0	2	0	2	2	0	2	2	2	2	2	2	0	0	0	2	0	0
P45877	PPIC	Peptidyl-prolyl cis-trans isomerase C	PPIC_HUMAN	1.66e-25	3	3	3	3	3	3	0	0	0	3	3	3	3	3	3	3	3	3	3	0	0	3	3	3	3	3	3	3	3	3	3	3	0	3	3	3	3	3	3	3	3	3	3	3	3
P45880	VDAC2	Voltage-dependent anion-selective channel protein 2	VDAC2_HUMAN	8.57e-22	6	6	6	0	0	0	0	0	0	6	6	6	6	6	6	0	6	0	6	0	0	6	6	6	6	6	6	6	6	6	6	6	0	6	6	6	6	6	6	6	6	6	6	6	6
P45974	USP5	Ubiquitin carboxyl-terminal hydrolase 5	UBP5_HUMAN	1.2e-16	5	5	5	5	5	5	0	0	0	5	5	5	5	5	5	5	5	0	5	0	0	5	5	5	5	5	5	5	5	5	0	5	0	5	5	5	5	5	5	5	5	5	5	5	5
P46108	CRK	Adapter molecule crk	CRK_HUMAN	1.77e-24	4	4	4	4	4	4	4	4	4	4	4	4	4	4	4	4	4	4	4	4	4	4	4	4	4	4	4	4	4	4	4	4	0	4	4	4	4	4	4	4	4	4	4	4	4
P46459	NSF	Vesicle-fusing ATPase	NSF_HUMAN	7.1e-11	0	7	0	7	7	7	0	0	0	0	7	7	7	7	7	7	7	0	7	0	0	0	0	0	7	7	7	7	7	7	0	0	0	7	0	7	0	7	0	7	7	7	7	0	7
P46531	NOTCH1	Neurogenic locus notch homolog protein 1	NOTC1_HUMAN	4.61e-09	6	6	6	6	6	0	6	6	6	6	6	6	6	6	6	6	6	6	6	6	6	6	6	6	6	6	6	6	6	6	6	6	0	6	6	6	6	6	6	6	6	6	6	6	6
P46777	RPL5	60S ribosomal protein L5	RL5_HUMAN	2.13e-09	0	5	5	0	0	0	0	0	0	5	5	5	5	5	5	5	5	0	5	0	0	5	5	0	5	5	5	5	5	5	0	0	0	5	5	5	0	0	5	0	0	0	5	0	0
P46781	RPS9	40S ribosomal protein S9	RS9_HUMAN	1.32e-08	6	6	6	0	0	6	0	0	0	0	0	0	6	6	6	6	6	0	6	0	0	0	6	0	6	6	6	6	6	6	0	0	0	6	6	6	6	6	6	6	6	6	6	6	6
P46926	GNPDA1	Glucosamine-6-phosphate isomerase 1	GNPI1_HUMAN	2.87e-20	6	6	6	6	6	6	0	0	0	6	6	6	6	6	6	6	6	6	6	0	0	6	6	6	6	6	6	6	6	6	6	6	0	6	6	6	6	6	6	6	6	6	6	6	6
P46940	IQGAP1	Ras GTPase-activating-like protein IQGAP1	IQGA1_HUMAN	1.87e-22	55	55	55	55	55	55	55	55	55	55	55	55	55	55	55	55	55	55	55	55	55	55	55	55	55	55	55	55	55	55	55	55	55	55	55	55	55	55	55	55	55	55	55	55	55
P46952	HAAO	3-hydroxyanthranilate 3,4-dioxygenase	3HAO_HUMAN	7.08e-19	5	5	5	5	5	5	0	0	0	5	5	5	5	5	5	5	5	5	5	5	5	5	5	5	5	5	5	5	5	5	5	5	0	5	5	5	5	5	5	5	5	5	5	0	5
P46976	GYG1	Glycogenin-1	GLYG_HUMAN	9.93e-25	3	3	0	3	3	3	0	0	0	3	3	3	3	3	3	0	3	0	3	0	0	3	3	3	3	3	3	3	3	3	0	0	0	3	3	3	3	0	3	0	3	0	3	0	3
P47755	CAPZA2	F-actin-capping protein subunit alpha-2	CAZA2_HUMAN	2.45e-23	4	4	4	4	4	4	0	0	0	4	4	4	4	4	4	4	4	0	4	0	0	4	4	4	4	4	4	4	4	4	4	4	0	4	4	4	4	4	4	4	0	0	4	4	0
P47756	CAPZB	F-actin-capping protein subunit beta	CAPZB_HUMAN	2.78e-19	14	14	14	14	14	14	14	14	14	14	14	14	14	14	14	14	14	14	14	14	0	14	14	14	14	14	14	14	14	14	14	14	14	14	14	14	14	14	14	14	14	14	14	14	14
P47895	ALDH1A3	Aldehyde dehydrogenase family 1 member A3	AL1A3_HUMAN	1.01e-11	3	3	3	0	0	3	3	3	3	3	3	3	3	3	3	3	3	3	3	3	3	3	3	3	3	3	3	3	3	3	3	3	3	3	3	3	3	3	3	3	0	3	3	3	3
P47897	QARS	Glutamine--tRNA ligase	SYQ_HUMAN	4e-11	0	8	0	8	8	8	0	0	0	8	8	8	8	8	8	8	8	0	8	0	0	0	8	8	8	8	8	8	8	8	0	8	0	8	8	8	8	8	8	8	0	8	8	0	8
P47929	LGALS7	Galectin-7	LEG7_HUMAN	9.81e-24	10	10	10	10	10	10	10	10	10	10	10	10	10	10	10	10	10	10	10	10	10	10	10	10	10	10	10	10	10	10	10	10	10	10	10	10	10	10	10	10	10	10	10	10	10
P47972	NPTX2	Neuronal pentraxin-2	NPTX2_HUMAN	1.01e-20	3	3	3	3	3	3	3	0	3	3	3	3	3	3	3	3	0	3	3	0	0	3	3	3	3	3	3	3	3	3	3	3	0	3	3	3	3	3	3	3	3	3	3	3	3
P47985	UQCRFS1	Cytochrome b-c1 complex subunit Rieske, mitochondrial	UCRI_HUMAN	6.24e-15	2	2	2	2	0	2	0	0	0	0	0	2	2	2	2	0	0	0	2	0	0	0	2	0	0	0	0	2	2	2	0	0	0	2	2	2	2	2	0	2	2	0	0	0	0
P48047	ATP5PO	ATP synthase subunit O, mitochondrial	ATPO_HUMAN	6.67e-14	4	4	0	0	4	4	0	0	0	4	4	4	4	4	4	0	0	0	4	0	0	4	4	4	4	4	4	4	4	4	0	0	0	4	4	4	4	4	4	4	4	4	4	4	0
P48061	CXCL12	Stromal cell-derived factor 1	SDF1_HUMAN	4.09e-23	5	5	5	5	5	5	5	5	5	5	5	5	5	5	5	5	5	5	5	5	5	5	5	5	5	5	5	5	5	5	5	5	5	5	5	5	5	5	5	5	5	5	5	5	5
P48147	PREP	Prolyl endopeptidase	PPCE_HUMAN	3.88e-20	3	3	3	3	3	3	0	0	0	0	3	3	3	3	3	0	0	0	3	0	0	0	0	0	3	3	3	3	3	3	0	0	0	3	3	3	3	3	0	0	0	0	3	0	0
P48163	ME1	NADP-dependent malic enzyme	MAOX_HUMAN	1.51e-19	0	0	0	0	3	0	0	0	0	0	3	3	3	3	3	0	3	0	3	0	0	3	0	3	3	3	3	3	3	3	3	0	0	3	3	3	0	0	0	3	0	0	3	0	0
P48304	REG1B	Lithostathine-1-beta	REG1B_HUMAN	2.29e-19	0	4	4	0	0	0	4	4	4	4	4	4	0	0	4	0	4	0	4	4	4	4	4	4	4	4	4	4	4	4	4	4	0	0	0	0	4	4	4	4	4	4	4	4	4
P48444	ARCN1	Coatomer subunit delta	COPD_HUMAN	2.97e-17	7	7	7	7	7	7	0	7	0	7	7	7	7	7	7	7	7	0	7	0	0	7	7	0	0	7	7	7	7	7	0	0	0	7	7	7	7	7	7	0	7	0	7	0	7
P48506	GCLC	Glutamate--cysteine ligase catalytic subunit	GSH1_HUMAN	5.22e-17	3	3	3	3	3	3	0	0	0	3	3	3	3	3	3	3	0	0	3	0	0	0	0	0	3	3	3	3	3	3	0	0	0	3	3	3	3	3	3	3	0	0	3	0	0
P48551	IFNAR2	Interferon alpha/beta receptor 2	INAR2_HUMAN	2.79e-17	2	2	2	2	2	2	2	2	2	2	2	2	2	2	2	2	2	2	2	2	2	2	2	2	2	2	2	2	2	2	2	2	0	2	2	2	2	2	2	2	2	2	2	2	2
P48556	PSMD8	26S proteasome non-ATPase regulatory subunit 8	PSMD8_HUMAN	5.58e-10	0	4	4	4	4	4	0	0	0	4	0	4	4	4	4	0	4	0	4	0	0	4	0	4	4	4	4	4	4	4	0	0	0	4	4	4	4	4	4	4	0	4	4	4	0
P48594	SERPINB4	Serpin B4	SPB4_HUMAN	1.87e-23	22	22	22	22	22	22	22	22	22	22	22	22	22	22	22	22	22	22	22	22	22	22	22	22	22	22	22	22	22	22	22	22	22	22	22	22	22	22	22	22	22	22	22	22	22
P48637	GSS	Glutathione synthetase	GSHB_HUMAN	5.71e-28	15	15	15	15	15	15	0	15	0	15	15	15	15	15	15	15	15	15	15	0	0	15	15	15	15	15	15	15	15	15	15	15	0	15	15	15	15	15	15	15	15	15	15	15	15
P48643	CCT5	T-complex protein 1 subunit epsilon	TCPE_HUMAN	2.63e-14	10	10	10	10	10	10	0	0	0	10	10	10	10	10	10	0	0	0	10	0	0	10	0	0	10	10	10	10	10	10	0	10	0	10	10	10	10	10	10	10	10	10	10	0	0
P48668	KRT6C	Keratin, type II cytoskeletal 6C	K2C6C_HUMAN	6.15e-19	2	2	2	2	2	2	2	2	0	2	2	2	2	2	2	2	2	2	2	0	0	2	2	2	2	2	2	2	2	2	2	2	0	2	2	2	2	2	2	0	2	2	2	2	2
P48723	HSPA13	Heat shock 70 kDa protein 13	HSP13_HUMAN	1.16e-18	2	2	2	2	2	2	0	0	0	2	2	2	2	0	2	0	0	0	2	0	0	0	2	0	2	2	2	2	2	2	0	0	0	2	2	2	2	2	2	2	2	2	2	2	2
P48735	IDH2	Isocitrate dehydrogenase [NADP], mitochondrial	IDHP_HUMAN	9.97e-26	10	10	10	10	10	10	0	0	0	10	10	10	10	10	10	10	10	0	10	0	0	10	10	10	10	10	10	10	10	10	0	10	0	10	10	10	10	10	10	10	10	10	10	10	10
P48739	PITPNB	Phosphatidylinositol transfer protein beta isoform	PIPNB_HUMAN	9.85e-12	0	0	3	3	0	3	0	0	0	3	3	3	3	3	3	0	3	0	3	0	0	0	3	0	0	0	0	3	3	3	3	3	0	3	0	0	0	0	0	0	0	0	0	0	0
P48740	MASP1	Mannan-binding lectin serine protease 1	MASP1_HUMAN	2.45e-17	5	5	5	5	0	5	5	5	5	5	5	5	5	5	5	5	5	5	5	5	5	5	5	5	5	5	5	5	5	5	0	5	0	5	5	5	5	5	5	5	0	0	5	5	0
P48745	CCN3	CCN family member 3	CCN3_HUMAN	2.57e-18	11	11	11	11	11	11	11	11	11	11	11	11	11	11	11	11	11	11	11	11	11	11	11	11	11	11	11	11	11	11	11	11	11	11	11	11	11	11	11	11	11	11	11	11	11
P48960	CD97	CD97 antigen	CD97_HUMAN	2.43e-23	3	3	3	3	3	3	3	3	3	3	3	3	3	3	3	3	3	3	3	3	3	3	3	3	3	3	3	3	3	3	3	3	3	3	3	3	3	3	3	3	3	3	3	3	3
P49189	ALDH9A1	4-trimethylaminobutyraldehyde dehydrogenase	AL9A1_HUMAN	5.74e-28	15	15	15	15	15	15	0	15	0	15	15	15	15	15	15	15	15	15	15	15	0	15	15	15	15	15	15	15	15	15	15	15	15	15	15	15	15	15	15	15	15	15	15	15	15
P49223	SPINT3	Kunitz-type protease inhibitor 3	SPIT3_HUMAN	8.03e-14	3	3	3	0	3	3	3	3	3	0	0	3	0	3	3	3	3	3	3	0	0	0	3	3	3	3	3	3	3	3	3	3	3	3	3	3	3	3	0	3	3	3	3	3	3
P49247	RPIA	Ribose-5-phosphate isomerase	RPIA_HUMAN	3.83e-19	0	0	0	0	3	3	0	0	0	3	3	0	3	3	3	0	0	0	3	0	0	0	0	0	3	0	3	3	3	3	0	0	0	3	0	0	3	3	0	3	0	0	3	0	0
P49327	FASN	Fatty acid synthase	FAS_HUMAN	1.53e-26	35	35	35	35	35	35	0	0	0	35	35	35	35	35	35	35	35	35	35	0	0	0	35	35	35	35	35	35	35	35	35	35	0	35	35	35	35	35	35	35	35	35	35	0	35
P49354	FNTA	Protein farnesyltransferase/geranylgeranyltransferase type-1 subunit alpha	FNTA_HUMAN	2.78e-08	0	0	0	5	0	0	0	0	0	5	5	5	5	5	5	0	0	0	5	0	0	5	0	0	5	5	5	5	5	5	0	5	0	5	5	5	5	5	5	0	0	0	5	0	0
P49368	CCT3	T-complex protein 1 subunit gamma	TCPG_HUMAN	2.76e-27	8	8	8	8	8	8	0	0	0	8	8	8	8	8	8	8	8	8	8	8	0	8	8	8	8	8	8	8	8	8	8	8	0	8	8	8	8	8	8	8	8	8	8	8	8
P49411	TUFM	Elongation factor Tu, mitochondrial	EFTU_HUMAN	1.24e-21	0	5	5	5	5	0	5	0	5	5	0	5	5	5	5	5	5	5	5	0	0	0	0	0	5	5	5	5	5	5	5	5	0	5	0	5	5	5	5	5	5	5	5	5	5
P49418	AMPH	Amphiphysin	AMPH_HUMAN	5.98e-29	5	5	5	5	5	5	5	5	5	5	5	5	5	5	5	5	5	5	5	5	5	5	5	5	5	5	5	5	5	5	5	5	0	5	5	5	5	5	5	5	5	5	5	5	5
P49419	ALDH7A1	Alpha-aminoadipic semialdehyde dehydrogenase	AL7A1_HUMAN	3.67e-24	15	15	15	15	15	15	0	15	15	15	15	15	15	15	15	15	15	15	15	0	0	15	15	15	15	15	15	15	15	15	15	15	0	15	15	15	15	15	15	15	15	15	15	15	15
P49585	PCYT1A	Choline-phosphate cytidylyltransferase A	PCY1A_HUMAN	6.19e-22	0	0	0	0	0	0	0	0	0	0	0	0	0	0	0	0	0	0	0	0	0	0	0	0	0	0	0	2	2	2	0	0	0	0	0	0	0	0	0	0	0	0	0	0	0
P49591	SARS	Serine--tRNA ligase, cytoplasmic	SYSC_HUMAN	1.25e-17	0	4	4	4	0	4	0	0	0	4	4	4	4	4	4	4	4	0	4	0	0	0	0	4	4	4	4	4	4	4	0	0	0	4	4	4	4	4	4	0	4	0	4	0	0
P49720	PSMB3	Proteasome subunit beta type-3	PSB3_HUMAN	8.77e-17	5	5	5	5	5	5	0	0	0	5	5	5	5	5	5	0	5	0	5	0	0	5	5	5	5	5	5	5	5	5	5	0	0	5	5	5	5	5	0	0	0	0	5	0	0
P49721	PSMB2	Proteasome subunit beta type-2	PSB2_HUMAN	4.59e-12	6	6	6	6	6	6	0	0	0	6	6	6	6	6	6	6	6	6	6	0	0	6	6	6	6	6	6	6	6	6	6	6	0	6	6	6	6	6	6	6	6	6	6	6	6
P49747	COMP	Cartilage oligomeric matrix protein	COMP_HUMAN	7.34e-22	20	20	20	20	20	20	20	20	20	20	20	20	20	20	20	20	20	20	20	20	20	20	20	20	20	20	20	20	20	20	20	20	20	20	20	20	20	20	20	20	20	20	20	20	20
P49748	ACADVL	Very long-chain specific acyl-CoA dehydrogenase, mitochondrial	ACADV_HUMAN	1.88e-07	0	0	5	5	5	5	0	0	0	0	0	5	5	5	5	0	0	0	5	0	0	0	0	0	5	5	5	5	5	5	0	0	0	5	5	5	5	5	5	0	0	0	0	0	0
P49755	TMED10	Transmembrane emp24 domain-containing protein 10	TMEDA_HUMAN	7.58e-14	3	3	3	3	0	3	0	0	0	3	0	3	3	3	3	3	3	0	3	0	3	3	3	3	3	3	3	3	3	3	0	3	3	3	3	3	3	3	3	3	0	3	3	0	3
P49763	PGF	Placenta growth factor	PLGF_HUMAN	1.94e-17	2	2	2	2	0	0	0	2	2	2	2	2	2	2	2	0	0	0	2	0	0	2	2	2	2	2	2	2	2	2	2	2	0	2	2	2	2	2	2	2	2	2	2	2	2
P49773	HINT1	Histidine triad nucleotide-binding protein 1	HINT1_HUMAN	3.9e-20	6	6	6	6	6	6	6	6	6	6	6	6	6	6	6	6	6	6	6	6	6	6	6	6	6	6	6	6	6	6	6	6	0	6	6	6	6	6	6	6	6	6	6	6	6
P49788	RARRES1	Retinoic acid receptor responder protein 1	TIG1_HUMAN	2.43e-05	0	0	0	2	2	2	2	0	0	2	2	2	2	2	2	2	2	2	2	0	0	2	2	2	2	2	2	2	2	2	2	2	0	2	2	2	2	2	2	0	0	0	2	0	0
P49862	KLK7	Kallikrein-7	KLK7_HUMAN	9.49e-14	8	8	0	0	8	8	8	8	0	8	8	8	8	8	8	8	8	8	8	0	8	0	8	8	8	8	8	8	8	8	8	8	8	0	8	8	8	0	8	0	0	8	0	0	8
P49902	NT5C2	Cytosolic purine 5'-nucleotidase	5NTC_HUMAN	7.89e-19	9	9	0	9	0	9	0	0	0	9	9	9	9	9	9	0	9	0	9	0	0	0	0	9	9	9	9	9	9	9	0	0	0	9	9	9	0	0	0	0	9	9	9	9	0
P49903	SEPHS1	Selenide, water dikinase 1	SPS1_HUMAN	2.86e-11	0	2	0	2	2	0	0	0	0	2	2	2	2	2	2	2	2	2	2	0	0	2	2	0	2	2	2	2	2	2	0	0	0	2	2	2	2	2	2	0	0	0	2	2	0
P49908	SELENOP	Selenoprotein P	SEPP1_HUMAN	2.11e-21	4	4	4	4	4	4	4	4	4	4	4	4	4	4	4	4	4	4	4	4	4	4	4	4	4	4	4	4	4	4	4	4	4	4	4	4	4	4	4	4	4	4	4	4	4
P49913	CAMP	Cathelicidin antimicrobial peptide	CAMP_HUMAN	3.07e-20	10	10	10	10	10	10	10	10	10	10	10	10	10	10	10	10	10	10	10	10	10	10	10	10	10	10	10	10	10	10	10	10	10	10	10	10	10	10	10	10	10	10	10	10	10
P50053	KHK	Ketohexokinase	KHK_HUMAN	1.31e-17	10	10	10	10	10	10	10	10	10	10	10	10	10	10	10	10	10	10	10	10	10	10	10	10	10	10	10	10	10	10	10	10	10	10	10	10	10	10	10	10	10	10	10	10	10
P50148	GNAQ	Guanine nucleotide-binding protein G(q) subunit alpha	GNAQ_HUMAN	3.28e-17	6	6	6	0	0	6	6	6	0	6	6	6	6	6	6	6	6	6	6	0	0	6	6	6	6	6	6	6	6	6	6	6	6	6	6	6	6	6	6	6	6	6	6	6	6
P50225;P50226	SULT1A1;SULT1A2	Sulfotransferase 1A1;Sulfotransferase 1A2	ST1A1_HUMAN;ST1A2_HUMAN	7.45e-16	2	2	2	2	2	2	0	0	0	2	2	2	2	2	2	0	0	0	2	0	0	0	2	2	2	2	2	2	2	0	0	0	0	2	2	2	2	2	2	2	2	2	2	2	2
P50395	GDI2	Rab GDP dissociation inhibitor beta	GDIB_HUMAN	1.19e-22	26	26	26	26	26	26	0	0	0	26	26	26	26	26	26	26	26	26	26	0	0	26	26	26	26	26	26	26	26	26	26	26	0	26	26	26	26	26	26	26	26	26	26	26	26
P50440	GATM	Glycine amidinotransferase, mitochondrial	GATM_HUMAN	4.71e-08	0	3	3	3	3	3	0	0	0	3	3	3	3	3	3	0	3	3	3	0	0	3	3	3	3	3	3	3	3	0	0	0	0	3	3	3	3	3	3	3	3	0	3	0	0
P50452	SERPINB8	Serpin B8	SPB8_HUMAN	9.16e-20	6	6	6	6	6	6	6	6	6	6	6	6	6	6	6	6	6	6	6	6	6	6	6	6	6	6	6	6	6	6	6	6	0	6	6	6	6	6	6	6	0	6	6	6	6
P50453	SERPINB9	Serpin B9	SPB9_HUMAN	7.55e-15	3	0	0	3	3	3	0	0	0	3	0	0	3	3	3	0	0	0	3	0	0	0	3	0	3	3	3	3	3	3	3	0	0	3	3	3	0	0	3	0	0	0	3	0	0
P50502	ST13	Hsc70-interacting protein	F10A1_HUMAN	1.08e-17	8	8	8	8	8	8	8	8	8	8	8	8	8	8	8	8	8	8	8	8	8	8	8	8	8	8	8	8	8	8	8	8	8	8	8	8	8	8	8	8	8	8	8	8	8
P50552	VASP	Vasodilator-stimulated phosphoprotein	VASP_HUMAN	9.82e-19	2	2	2	0	0	0	0	2	2	2	2	2	2	2	2	2	0	2	2	2	2	2	2	0	2	2	2	2	2	2	2	2	0	2	2	2	0	0	0	2	2	2	2	2	2
P50570	DNM2	Dynamin-2	DYN2_HUMAN	1.03e-21	7	7	7	7	7	0	0	0	0	7	7	7	7	7	7	7	7	7	7	0	0	0	7	0	7	7	7	7	7	7	7	7	0	7	7	7	7	7	7	7	7	7	7	7	7
P50851	LRBA	Lipopolysaccharide-responsive and beige-like anchor protein	LRBA_HUMAN	2.44e-11	3	3	3	3	3	3	3	3	3	3	3	3	3	3	3	3	3	3	3	3	3	3	3	3	3	3	3	3	3	3	3	3	3	3	3	3	3	3	3	3	3	3	3	3	3
P50895	BCAM	Basal cell adhesion molecule	BCAM_HUMAN	5.98e-29	21	21	21	21	21	21	21	21	21	21	21	21	21	21	21	21	21	21	21	21	21	21	21	21	21	21	21	21	21	21	21	21	21	21	21	21	21	21	21	21	21	21	21	21	21
P50897	PPT1	Palmitoyl-protein thioesterase 1	PPT1_HUMAN	3.06e-21	5	5	5	5	5	5	5	5	5	5	5	5	5	5	5	5	5	5	5	0	0	5	5	5	5	5	5	5	5	5	5	5	0	5	5	5	5	5	5	5	0	0	5	5	5
P50914	RPL14	60S ribosomal protein L14	RL14_HUMAN	7.54e-24	3	0	0	0	0	0	0	0	0	0	0	3	3	3	3	0	0	0	0	0	0	3	0	3	3	3	3	3	3	3	0	0	0	3	3	3	0	0	0	0	0	0	3	0	0
P50990	CCT8	T-complex protein 1 subunit theta	TCPQ_HUMAN	7.59e-24	21	21	21	21	21	21	21	21	21	21	21	21	21	21	21	21	21	21	21	21	21	21	21	21	21	21	21	21	21	21	21	21	21	21	21	21	21	21	21	21	21	21	21	21	21
P50991	CCT4	T-complex protein 1 subunit delta	TCPD_HUMAN	4.23e-23	7	7	7	7	7	7	0	0	0	7	7	7	7	7	7	7	7	7	7	0	0	7	7	7	7	7	7	7	7	7	7	7	0	7	7	7	7	7	7	7	7	7	7	7	7
P50995	ANXA11	Annexin A11	ANX11_HUMAN	1.67e-24	22	22	22	22	22	22	22	22	22	22	22	22	22	22	22	22	22	22	22	22	22	22	22	22	22	22	22	22	22	22	22	22	22	22	22	22	22	22	22	22	22	22	22	22	22
P51148	RAB5C	Ras-related protein Rab-5C	RAB5C_HUMAN	5.98e-29	4	4	4	4	4	4	0	0	4	4	4	4	4	4	4	4	4	4	4	0	0	0	4	0	4	4	4	4	4	4	4	4	0	4	4	4	4	4	4	4	4	4	4	4	4
P51149	RAB7A	Ras-related protein Rab-7a	RAB7A_HUMAN	3.64e-24	9	9	9	9	9	9	9	9	0	9	9	9	9	9	9	9	9	9	9	0	0	9	9	9	9	9	9	9	9	9	9	9	9	9	9	9	9	9	9	9	9	9	9	9	9
P51170	SCNN1G	Amiloride-sensitive sodium channel subunit gamma	SCNNG_HUMAN	1.16e-19	3	3	3	3	0	0	3	3	3	3	3	3	3	3	3	3	3	3	3	3	3	3	3	3	3	3	3	3	0	0	3	3	0	3	3	3	3	3	3	3	3	3	3	3	3
P51178	PLCD1	1-phosphatidylinositol 4,5-bisphosphate phosphodiesterase delta-1	PLCD1_HUMAN	4.92e-12	0	4	4	4	0	4	0	0	0	4	0	4	4	4	4	4	4	4	4	0	0	0	0	0	4	4	4	4	4	4	0	0	0	0	4	4	4	4	4	0	4	0	4	0	4
P51570	GALK1	Galactokinase	GALK1_HUMAN	1.14e-06	0	3	3	3	0	3	0	0	0	3	3	3	3	3	3	0	3	3	3	0	0	3	3	3	3	3	3	3	3	3	0	0	0	3	3	3	3	3	3	3	0	3	3	3	3
P51580	TPMT	Thiopurine S-methyltransferase	TPMT_HUMAN	2.36e-23	6	6	6	6	6	6	0	0	0	6	6	6	6	6	6	6	6	6	6	0	0	6	6	6	6	6	6	6	6	6	6	0	0	6	6	6	6	6	6	6	0	6	6	6	6
P51606	RENBP	N-acylglucosamine 2-epimerase	RENBP_HUMAN	4.48e-13	4	4	4	4	4	4	4	0	0	4	4	4	4	4	4	4	4	4	4	0	0	4	4	4	4	4	4	4	4	4	4	4	0	4	4	4	4	4	4	4	0	0	4	4	4
P51648	ALDH3A2	Fatty aldehyde dehydrogenase	AL3A2_HUMAN	2.42e-15	0	7	7	0	0	7	0	0	0	7	7	7	7	7	7	7	7	0	7	0	0	7	7	0	7	7	7	7	7	7	0	0	0	7	7	7	7	7	7	0	0	7	7	0	0
P51654	GPC3	Glypican-3	GPC3_HUMAN	6.52e-27	8	8	8	8	8	8	8	8	8	8	8	8	8	8	8	8	8	8	8	8	0	8	8	8	8	8	8	8	8	8	8	8	8	8	8	8	8	8	8	8	8	8	8	8	0
P51659	HSD17B4	Peroxisomal multifunctional enzyme type 2	DHB4_HUMAN	4.35e-23	10	0	10	10	10	10	0	0	0	10	10	10	10	10	10	0	10	0	10	0	0	10	10	10	10	10	10	10	10	10	0	10	0	10	10	10	10	10	10	0	0	0	10	0	0
P51665	PSMD7	26S proteasome non-ATPase regulatory subunit 7	PSMD7_HUMAN	2.78e-05	2	2	2	2	2	2	2	0	0	2	2	2	2	2	2	2	2	0	2	0	0	2	2	2	2	2	2	2	2	2	2	2	2	2	2	2	2	2	2	2	0	0	2	0	0
P51688	SGSH	N-sulphoglucosamine sulphohydrolase	SPHM_HUMAN	5.91e-24	15	15	15	15	15	15	0	15	15	15	15	15	15	15	15	15	15	15	15	15	15	15	15	15	15	15	15	15	15	15	15	15	15	15	15	15	15	15	15	15	15	15	15	15	15
P51693	APLP1	Amyloid-like protein 1	APLP1_HUMAN	1.12e-22	4	4	4	4	4	4	4	4	4	4	4	4	4	4	4	4	4	4	4	4	4	4	4	4	4	4	4	4	4	4	4	4	4	4	4	4	4	4	4	4	4	4	4	4	4
P51858	HDGF	Hepatoma-derived growth factor	HDGF_HUMAN	1.51e-06	4	4	4	4	4	4	4	4	4	4	4	4	4	4	4	4	4	0	4	4	4	4	4	4	4	4	4	4	4	4	0	4	0	4	4	4	0	4	4	4	0	4	4	4	0
P51884	LUM	Lumican	LUM_HUMAN	4.31e-19	13	13	13	13	13	13	13	13	13	13	13	13	13	13	13	13	13	13	13	13	13	13	13	13	13	13	13	13	13	13	13	13	13	13	13	13	13	13	13	13	13	13	13	13	13
P51991	HNRNPA3	Heterogeneous nuclear ribonucleoprotein A3	ROA3_HUMAN	6.07e-13	0	6	0	0	6	0	0	0	0	6	6	0	6	6	6	0	0	0	6	0	0	6	6	0	6	6	0	6	6	6	6	6	0	6	6	6	6	6	6	0	0	0	6	0	0
P52209	PGD	6-phosphogluconate dehydrogenase, decarboxylating	6PGD_HUMAN	7.26e-20	18	18	18	18	18	18	0	0	18	18	18	18	18	18	18	18	18	18	18	0	0	18	18	18	18	18	18	18	18	18	18	18	0	18	18	18	18	18	18	18	18	18	18	18	18
P52272	HNRNPM	Heterogeneous nuclear ribonucleoprotein M	HNRPM_HUMAN	1.27e-23	8	8	8	8	8	8	8	8	8	8	8	8	8	8	8	8	8	8	8	8	8	8	8	8	8	8	8	8	8	8	8	8	8	8	8	8	8	8	8	8	8	8	8	8	8
P52565	ARHGDIA	Rho GDP-dissociation inhibitor 1	GDIR1_HUMAN	2.41e-18	7	7	7	7	7	7	7	7	7	7	7	7	7	7	7	7	7	7	7	7	7	7	7	7	7	7	7	7	7	7	7	7	7	7	7	7	7	7	7	7	7	7	7	7	7
P52566	ARHGDIB	Rho GDP-dissociation inhibitor 2	GDIR2_HUMAN	1.01e-11	8	8	8	8	8	8	8	8	8	8	8	8	8	8	8	8	8	8	8	8	8	8	8	8	8	8	8	8	8	8	8	8	0	8	8	8	8	8	8	8	0	0	8	8	8
P52758	RIDA	2-iminobutanoate/2-iminopropanoate deaminase	RIDA_HUMAN	1.8e-20	6	6	6	6	6	6	6	6	6	6	6	6	6	6	6	6	6	6	6	6	6	6	6	6	6	6	6	6	6	6	6	6	6	6	6	6	6	6	6	6	6	6	6	6	6
P52798	EFNA4	Ephrin-A4	EFNA4_HUMAN	2.21e-06	2	2	2	2	2	2	0	0	0	2	2	2	0	0	0	0	0	0	2	0	0	2	2	0	2	2	2	2	2	2	0	0	0	2	0	2	0	0	0	0	0	0	2	0	0
P52803	EFNA5	Ephrin-A5	EFNA5_HUMAN	1.16e-10	3	3	0	3	3	3	0	0	0	3	3	3	3	3	3	3	3	3	3	3	3	3	3	3	3	3	3	3	3	3	3	3	3	3	3	3	3	3	3	3	0	3	3	3	3
P52823	STC1	Stanniocalcin-1	STC1_HUMAN	5.89e-20	5	5	5	5	5	5	5	5	5	5	5	5	5	5	5	5	5	5	5	5	5	5	5	5	5	5	5	5	5	5	5	0	0	5	5	5	5	5	5	5	0	5	5	0	5
P52907	CAPZA1	F-actin-capping protein subunit alpha-1	CAZA1_HUMAN	5.59e-27	9	9	9	9	9	9	9	9	9	9	9	9	9	9	9	9	9	9	9	9	9	9	9	9	9	9	9	9	9	9	9	9	0	9	9	9	9	9	9	9	9	9	9	9	9
P53004	BLVRA	Biliverdin reductase A	BIEA_HUMAN	1.95e-13	5	5	5	5	5	5	5	0	0	5	5	5	5	5	5	5	5	5	5	0	0	5	5	5	5	5	5	5	5	5	5	5	0	5	5	5	5	5	5	0	0	0	5	0	0
P53396	ACLY	ATP-citrate synthase	ACLY_HUMAN	5.98e-29	6	0	6	6	6	0	6	0	0	6	6	6	6	6	6	6	6	0	6	0	0	0	6	0	6	6	6	6	6	6	0	0	0	6	6	6	6	6	6	6	6	6	6	0	6
P53618	COPB1	Coatomer subunit beta	COPB_HUMAN	1.86e-16	0	5	0	5	5	5	0	0	0	0	5	0	5	5	5	0	0	0	0	0	0	0	0	5	5	0	5	5	5	5	0	0	0	5	5	5	0	0	0	5	0	0	5	0	0
P53621	COPA	Coatomer subunit alpha	COPA_HUMAN	3.39e-15	13	13	13	0	0	0	0	0	0	13	13	0	13	13	13	0	0	0	13	0	0	0	13	0	13	13	13	13	13	13	0	0	0	13	13	13	13	13	13	13	13	13	13	13	0
P53634	CTSC	Dipeptidyl peptidase 1	CATC_HUMAN	6.52e-24	16	16	16	16	16	16	16	16	16	16	16	16	16	16	16	16	16	16	16	16	16	16	16	16	16	16	16	16	16	16	16	16	16	16	16	16	16	16	16	16	16	16	16	16	16
P53801	PTTG1IP	Pituitary tumor-transforming gene 1 protein-interacting protein	PTTG_HUMAN	2.45e-20	3	3	3	3	3	3	3	3	3	3	3	3	3	3	3	3	3	3	3	3	3	3	3	3	3	3	3	3	3	3	3	3	3	3	3	3	3	3	3	3	3	3	3	3	3
P53990	IST1	IST1 homolog	IST1_HUMAN	1.82e-25	15	15	15	15	15	15	15	15	15	15	15	15	15	15	15	15	15	15	15	15	15	15	15	15	15	15	15	15	15	15	15	15	15	15	15	15	15	15	15	15	15	15	15	15	15
P53999	SUB1	Activated RNA polymerase II transcriptional coactivator p15	TCP4_HUMAN	1.9e-16	2	2	2	0	0	0	0	0	0	0	2	0	2	2	2	0	2	2	2	0	0	0	0	2	2	2	2	2	2	2	2	2	0	2	2	0	2	2	2	2	2	2	2	2	2
P54107	CRISP1	Cysteine-rich secretory protein 1	CRIS1_HUMAN	8.57e-19	0	7	0	0	0	0	0	0	0	0	0	0	7	0	0	0	7	0	0	0	0	0	0	0	0	0	0	0	0	0	0	0	0	7	0	0	0	0	0	7	7	7	7	7	7
P54108	CRISP3	Cysteine-rich secretory protein 3	CRIS3_HUMAN	2.19e-16	3	3	3	3	3	3	3	0	0	3	3	3	3	3	3	3	3	3	3	3	3	3	3	3	3	3	3	3	3	3	3	3	3	3	3	3	3	3	3	3	3	3	3	3	3
P54136	RARS	Arginine--tRNA ligase, cytoplasmic	SYRC_HUMAN	5.79e-13	0	4	4	0	0	4	0	0	0	4	4	0	4	4	4	0	0	0	0	0	0	4	4	0	4	4	4	4	4	4	0	0	0	4	4	0	4	4	0	0	0	0	4	0	0
P54289	CACNA2D1	Voltage-dependent calcium channel subunit alpha-2/delta-1	CA2D1_HUMAN	1.59e-22	20	20	20	20	20	20	20	20	20	20	20	20	20	20	20	20	20	20	20	20	20	20	20	20	20	20	20	20	20	20	20	20	0	20	20	20	20	20	20	20	20	20	20	20	20
P54577	YARS	Tyrosine--tRNA ligase, cytoplasmic	SYYC_HUMAN	2.11e-08	0	0	0	3	0	0	0	0	0	3	0	0	3	3	3	0	0	0	3	0	0	0	0	0	3	3	3	3	3	3	0	0	0	3	3	0	3	3	0	0	0	0	3	0	3
P54578	USP14	Ubiquitin carboxyl-terminal hydrolase 14	UBP14_HUMAN	2.98e-11	0	5	5	5	5	5	5	0	0	5	5	5	5	5	5	5	5	0	5	0	0	5	5	5	5	5	5	5	5	5	5	5	0	5	5	5	5	5	5	5	5	5	5	5	5
P54619	PRKAG1	5'-AMP-activated protein kinase subunit gamma-1	AAKG1_HUMAN	2.91e-08	2	2	2	2	2	2	0	0	0	0	2	0	2	2	2	0	2	0	2	0	0	0	0	0	2	2	2	0	2	0	0	0	0	2	2	2	2	2	0	0	0	0	2	0	0
P54652	HSPA2	Heat shock-related 70 kDa protein 2	HSP72_HUMAN	4.57e-18	6	6	6	6	6	6	6	6	6	6	6	6	6	6	6	6	6	6	6	0	0	6	6	6	6	6	6	6	6	6	6	6	0	6	6	6	6	6	6	6	6	6	6	6	6
P54710	FXYD2	Sodium/potassium-transporting ATPase subunit gamma	ATNG_HUMAN	1.71e-28	2	0	0	2	0	0	0	0	0	2	0	2	2	0	2	2	2	2	2	2	2	0	2	2	2	2	2	2	0	2	2	2	2	2	2	2	2	2	2	2	2	2	2	2	2
P54725	RAD23A	UV excision repair protein RAD23 homolog A	RD23A_HUMAN	1.08e-10	3	3	3	3	3	3	0	3	0	3	3	3	3	3	3	3	3	3	3	0	3	3	3	3	3	3	3	3	3	3	3	3	0	3	3	3	3	3	3	3	3	3	3	3	3
P54727	RAD23B	UV excision repair protein RAD23 homolog B	RD23B_HUMAN	5.98e-29	11	11	11	11	11	11	11	11	11	11	11	11	11	11	11	11	11	11	11	11	11	11	11	11	11	11	11	11	11	11	11	11	11	11	11	11	11	11	11	11	11	11	11	11	11
P54753	EPHB3	Ephrin type-B receptor 3	EPHB3_HUMAN	8.87e-21	14	14	14	14	14	14	14	14	14	14	14	14	14	14	14	14	14	14	14	14	14	14	14	14	14	14	14	14	14	14	14	14	14	14	14	14	14	14	14	14	14	14	14	14	14
P54760	EPHB4	Ephrin type-B receptor 4	EPHB4_HUMAN	1.38e-24	15	15	15	15	15	15	15	15	15	15	15	15	15	15	15	15	15	15	15	15	15	15	15	15	15	15	15	15	15	15	15	15	15	15	15	15	15	15	15	15	15	15	15	15	15
P54764	EPHA4	Ephrin type-A receptor 4	EPHA4_HUMAN	1.52e-22	4	4	4	4	4	4	4	4	4	4	4	4	4	4	4	4	4	4	4	0	0	4	4	4	4	4	4	4	4	4	4	4	0	4	4	4	4	4	4	4	4	4	4	4	4
P54793	ARSF	Arylsulfatase F	ARSF_HUMAN	4.86e-25	10	10	10	10	10	10	10	0	10	10	10	10	10	10	10	10	10	10	10	0	0	10	10	10	10	10	10	10	10	10	10	10	0	10	10	10	10	10	10	10	10	10	10	10	10
P54802	NAGLU	Alpha-N-acetylglucosaminidase	ANAG_HUMAN	5.14e-26	27	27	27	27	27	27	27	0	0	27	27	27	27	27	27	27	27	27	27	27	0	27	27	27	27	27	27	27	27	27	27	27	27	27	27	27	27	27	27	27	27	27	27	27	27
P54803	GALC	Galactocerebrosidase	GALC_HUMAN	2.12e-20	2	2	2	2	2	2	0	0	0	2	2	2	2	2	2	2	2	2	2	0	0	2	2	0	2	2	2	2	2	2	2	2	0	2	2	2	2	2	2	2	0	0	2	0	2
P54819	AK2	Adenylate kinase 2, mitochondrial	KAD2_HUMAN	1.03e-23	10	10	10	10	10	10	10	10	10	10	10	10	10	10	10	10	10	10	10	10	0	10	10	10	10	10	10	10	10	10	10	10	0	10	10	10	10	10	10	10	0	10	10	10	10
P54826	GAS1	Growth arrest-specific protein 1	GAS1_HUMAN	5.48e-19	8	8	8	8	8	8	8	8	8	8	8	8	8	8	8	8	8	8	8	8	8	8	8	8	8	8	8	8	8	8	8	8	8	8	8	8	8	8	8	8	8	8	8	8	8
P54840	GYS2	Glycogen [starch] synthase, liver	GYS2_HUMAN	3.31e-23	3	3	3	0	3	0	0	0	0	3	0	0	3	3	3	0	0	0	3	0	0	0	3	3	3	3	3	3	3	3	3	3	0	3	3	3	0	0	3	0	0	0	3	0	0
P54920	NAPA	Alpha-soluble NSF attachment protein	SNAA_HUMAN	1.93e-14	4	4	4	4	4	4	0	0	0	4	4	4	4	4	4	4	4	0	4	0	0	4	4	4	4	4	4	4	4	4	0	4	0	4	4	4	4	4	4	4	0	4	4	4	4
P55000	SLURP1	Secreted Ly-6/uPAR-related protein 1	SLUR1_HUMAN	2.88e-15	5	5	5	5	5	5	5	5	5	5	5	5	5	5	5	5	5	5	5	5	5	5	5	5	5	5	5	5	5	5	5	5	5	5	5	5	5	5	5	5	5	5	5	5	5
P55010	EIF5	Eukaryotic translation initiation factor 5	IF5_HUMAN	1.27e-09	5	5	5	5	5	5	5	5	5	5	5	5	5	5	5	5	5	5	5	5	5	5	5	5	5	5	5	5	5	5	5	5	5	5	5	5	5	5	5	5	0	5	5	5	5
P55017	SLC12A3	Solute carrier family 12 member 3	S12A3_HUMAN	4.6e-25	22	22	22	22	22	22	0	0	0	22	22	22	22	22	22	22	22	22	22	0	22	22	22	22	22	22	22	22	22	22	22	22	22	22	22	22	22	22	22	22	22	22	22	22	22
P55058	PLTP	Phospholipid transfer protein	PLTP_HUMAN	3.77e-11	4	4	0	4	4	4	4	4	4	4	4	4	4	4	4	4	4	4	4	4	4	4	4	4	4	4	4	4	4	4	4	4	0	4	4	4	4	4	4	4	4	4	4	4	4
P55060	CSE1L	Exportin-2	XPO2_HUMAN	1.78e-09	5	5	5	5	5	5	5	5	5	5	5	5	5	5	5	0	5	5	5	5	5	0	0	5	5	5	5	5	5	5	5	0	5	5	5	5	5	5	5	5	5	5	5	5	5
P55072	VCP	Transitional endoplasmic reticulum ATPase	TERA_HUMAN	2.33e-27	25	25	25	25	25	25	0	0	25	25	25	25	25	25	25	25	25	25	25	25	25	25	25	25	25	25	25	25	25	25	25	25	25	25	25	25	25	25	25	25	25	25	25	25	25
P55083	MFAP4	Microfibril-associated glycoprotein 4	MFAP4_HUMAN	1.62e-23	2	2	2	2	2	2	2	2	2	2	2	2	2	2	2	2	0	2	2	0	2	2	2	2	2	2	2	2	2	2	2	2	0	2	2	2	2	2	2	2	2	2	2	2	2
P55084	HADHB	Trifunctional enzyme subunit beta, mitochondrial	ECHB_HUMAN	1.25e-11	5	5	5	5	5	5	5	0	0	5	5	5	5	5	5	5	5	5	5	0	0	5	5	5	5	5	5	5	5	5	0	5	0	5	5	5	5	5	5	5	5	5	5	5	5
P55103	INHBC	Inhibin beta C chain	INHBC_HUMAN	3.96e-13	2	2	2	2	2	2	2	2	2	2	2	2	2	2	2	2	2	2	2	2	2	2	2	2	2	2	2	2	2	2	2	2	0	2	2	2	2	2	2	2	2	2	2	2	2
P55145	MANF	Mesencephalic astrocyte-derived neurotrophic factor	MANF_HUMAN	3.97e-26	7	7	7	0	7	7	0	0	0	7	7	7	7	7	7	7	7	7	7	7	7	7	7	7	7	7	7	7	7	7	7	0	0	7	7	7	7	7	7	7	7	7	7	7	7
P55160	NCKAP1L	Nck-associated protein 1-like	NCKPL_HUMAN	1.51e-13	0	0	3	0	3	3	3	3	3	3	3	3	0	0	0	3	3	0	3	3	3	3	3	3	3	3	3	0	3	3	3	3	3	3	3	3	0	3	3	3	3	3	3	3	3
P55196	AFDN	Afadin	AFAD_HUMAN	2.99e-09	6	0	0	0	0	6	0	0	0	6	6	6	6	6	6	6	0	0	6	0	0	0	0	0	6	6	6	6	6	6	0	0	0	0	0	6	0	0	0	0	0	0	6	6	0
P55259	GP2	Pancreatic secretory granule membrane major glycoprotein GP2	GP2_HUMAN	1.13e-18	4	4	4	4	4	4	4	4	4	4	4	4	4	4	4	4	4	4	4	4	4	4	4	4	4	4	4	4	4	4	4	4	4	4	4	4	4	4	4	4	4	4	4	4	4
P55263	ADK	Adenosine kinase	ADK_HUMAN	5.53e-11	3	0	0	3	0	0	0	0	0	3	3	3	3	3	3	0	3	0	3	0	0	0	0	3	3	3	3	3	3	3	3	0	0	3	3	3	0	3	3	3	0	0	3	0	0
P55268	LAMB2	Laminin subunit beta-2	LAMB2_HUMAN	7.7e-25	17	17	17	17	17	17	17	17	17	17	17	17	17	17	17	17	17	17	17	17	17	17	17	17	17	17	17	17	17	17	17	17	0	17	17	17	17	17	17	17	17	17	17	17	17
P55283	CDH4	Cadherin-4	CADH4_HUMAN	7.77e-27	3	3	3	3	3	3	3	3	3	3	3	3	3	3	3	3	3	3	3	0	0	3	3	3	3	3	3	3	3	3	3	3	0	3	3	3	3	3	3	3	3	3	3	3	3
P55285	CDH6	Cadherin-6	CADH6_HUMAN	2.39e-23	15	15	15	15	15	15	15	15	15	15	15	15	15	15	15	15	15	15	15	15	15	15	15	15	15	15	15	15	15	15	15	15	15	15	15	15	15	15	15	15	15	15	15	15	15
P55286	CDH8	Cadherin-8	CADH8_HUMAN	1.83e-19	4	4	4	4	0	4	4	4	4	4	4	4	4	4	4	4	4	4	4	4	4	4	4	4	4	4	4	4	4	4	4	0	0	4	4	4	4	4	4	4	4	4	4	4	4
P55287	CDH11	Cadherin-11	CAD11_HUMAN	1.17e-28	24	24	24	24	24	24	24	24	24	24	24	24	24	24	24	24	24	24	24	24	24	24	24	24	24	24	24	24	24	24	24	24	24	24	24	24	24	24	24	24	24	24	24	24	24
P55290	CDH13	Cadherin-13	CAD13_HUMAN	9.31e-24	20	20	20	20	20	20	20	20	20	20	20	20	20	20	20	20	20	20	20	20	20	20	20	20	20	20	20	20	20	20	20	20	20	20	20	20	20	20	20	20	20	20	20	20	20
P55291	CDH15	Cadherin-15	CAD15_HUMAN	1.35e-21	9	9	9	9	9	9	9	9	9	9	9	9	9	9	9	9	9	9	9	9	9	9	9	9	9	9	9	9	9	9	9	9	0	9	9	9	9	9	9	9	9	0	9	9	9
P55327	TPD52	Tumor protein D52	TPD52_HUMAN	8.73e-24	3	3	3	3	3	3	0	0	0	3	3	3	3	3	3	3	3	3	3	3	3	3	3	3	3	3	3	3	3	3	3	3	0	3	3	3	3	3	3	0	3	0	3	0	0
P55786	NPEPPS	Puromycin-sensitive aminopeptidase	PSA_HUMAN	5.98e-29	26	26	26	26	26	26	26	26	0	26	26	26	26	26	26	26	26	26	26	0	0	26	26	26	26	26	26	26	26	26	26	26	0	26	26	26	26	26	26	26	26	26	26	26	26
P55884	EIF3B	Eukaryotic translation initiation factor 3 subunit B	EIF3B_HUMAN	9.67e-08	0	0	0	0	0	0	0	0	0	6	0	0	6	6	6	0	0	0	6	0	0	0	0	0	0	0	0	6	6	6	0	0	0	0	0	0	0	6	6	0	0	0	0	0	0
P55957	BID	BH3-interacting domain death agonist	BID_HUMAN	9.95e-29	6	6	6	6	6	6	0	0	0	6	6	6	6	6	6	6	6	6	6	0	0	6	6	6	6	6	6	6	6	6	6	6	0	6	6	6	6	6	6	6	0	6	6	0	6
P56134	ATP5MF	ATP synthase subunit f, mitochondrial	ATPK_HUMAN	2.69e-19	2	2	2	2	2	0	2	0	0	2	2	2	2	2	2	2	2	0	2	0	0	2	2	2	2	2	2	2	2	2	2	2	0	2	2	2	2	2	2	2	0	2	2	2	2
P56385	ATP5ME	ATP synthase subunit e, mitochondrial	ATP5I_HUMAN	5.65e-08	0	2	0	0	2	0	0	0	0	2	2	2	2	2	2	0	2	0	2	2	0	2	2	2	2	2	2	2	2	2	2	0	0	2	2	2	2	2	2	0	0	0	2	0	0
P56537	EIF6	Eukaryotic translation initiation factor 6	IF6_HUMAN	1.35e-24	9	9	9	9	9	9	9	9	9	9	9	9	9	9	9	9	9	9	9	9	9	9	9	9	9	9	9	9	9	9	9	9	9	9	9	9	9	9	9	9	9	9	9	9	9
P56851	EDDM3B	Epididymal secretory protein E3-beta	EP3B_HUMAN	4.52e-23	2	2	2	2	2	2	0	0	0	2	2	0	2	2	2	0	0	2	2	2	2	2	0	0	2	2	2	2	2	2	0	2	0	2	2	2	2	2	2	2	2	2	2	2	2
P57087	JAM2	Junctional adhesion molecule B	JAM2_HUMAN	6.15e-20	2	0	2	0	0	0	2	2	2	2	2	2	0	0	0	0	2	0	2	2	2	2	2	2	2	2	2	2	2	2	2	2	0	2	2	2	2	0	2	2	2	2	2	0	2
P57735	RAB25	Ras-related protein Rab-25	RAB25_HUMAN	9.93e-18	3	3	3	3	0	3	0	0	0	3	3	3	3	3	3	3	3	3	3	0	0	0	0	0	3	3	3	3	3	3	3	0	0	3	3	3	3	3	3	3	3	3	3	0	0
P58062	SPINK7	Serine protease inhibitor Kazal-type 7	ISK7_HUMAN	1.66e-10	3	3	3	3	0	3	3	0	0	3	0	0	3	3	3	3	3	3	3	0	3	3	3	0	3	3	3	3	3	3	3	3	3	3	3	3	0	3	0	0	0	0	3	0	0
P58107	EPPK1	Epiplakin	EPIPL_HUMAN	5.63e-15	5	0	0	0	5	0	5	0	0	5	5	5	5	5	5	5	5	5	5	0	0	5	0	5	5	5	5	5	5	5	0	0	0	5	5	5	5	5	5	5	0	5	0	0	0
P58400;Q9ULB1	NRXN1	Neurexin-1-beta;Neurexin-1	NRX1B_HUMAN;NRX1A_HUMAN	6.72e-17	2	2	2	0	2	2	2	2	2	0	0	2	2	2	2	0	0	2	2	2	2	2	2	2	2	2	2	2	2	2	2	2	2	2	2	2	0	0	2	2	2	2	2	2	2
P58499	FAM3B	Protein FAM3B	FAM3B_HUMAN	1.48e-21	8	8	8	8	8	8	8	8	8	8	8	8	8	8	8	8	8	8	8	8	8	8	8	8	8	8	8	8	8	8	8	8	8	8	8	8	8	8	8	8	8	8	8	8	8
P58546	MTPN	Myotrophin	MTPN_HUMAN	3.64e-22	7	7	7	7	7	7	7	7	7	7	7	7	7	7	7	7	7	7	7	7	0	7	7	7	7	7	7	7	7	7	7	7	0	7	7	7	7	7	7	7	0	0	7	0	0
P59666	DEFA3	Neutrophil defensin 3	DEF3_HUMAN	4.91e-10	5	5	5	5	5	5	5	5	5	5	5	5	5	5	5	5	5	5	5	5	5	5	5	5	5	5	5	5	5	5	5	5	5	5	5	5	5	5	5	5	5	5	5	5	5
P59998	ARPC4	Actin-related protein 2/3 complex subunit 4	ARPC4_HUMAN	5.81e-21	4	4	4	4	4	4	4	4	0	4	4	4	4	4	4	4	4	4	4	4	0	4	4	4	4	4	4	4	4	4	4	4	0	4	4	4	4	4	4	4	4	4	4	4	4
P60022	DEFB1	Beta-defensin 1	DEFB1_HUMAN	3.57e-10	2	2	2	2	2	2	2	2	2	2	2	2	2	2	2	2	2	2	2	2	2	2	2	2	2	2	2	2	2	2	2	2	2	2	2	2	2	2	2	2	2	2	2	2	2
P60033	CD81	CD81 antigen	CD81_HUMAN	1.71e-14	3	3	3	0	0	0	0	0	0	3	3	3	3	3	3	3	3	0	3	0	0	0	0	3	3	3	3	3	3	3	3	3	0	3	3	3	3	3	3	3	3	3	3	3	3
P60174	TPI1	Triosephosphate isomerase	TPIS_HUMAN	2.3e-28	18	18	18	18	18	18	18	18	18	18	18	18	18	18	18	18	18	18	18	18	18	18	18	18	18	18	18	18	18	18	18	18	18	18	18	18	18	18	18	18	18	18	18	18	18
P60228	EIF3E	Eukaryotic translation initiation factor 3 subunit E	EIF3E_HUMAN	8.69e-09	0	0	0	0	0	0	0	0	0	0	0	0	3	3	3	0	0	0	3	0	0	0	0	0	3	0	0	3	3	3	0	0	0	0	0	0	0	0	0	0	0	0	3	0	0
P60660	MYL6	Myosin light polypeptide 6	MYL6_HUMAN	2.86e-24	8	8	8	8	8	8	8	8	8	8	8	8	8	8	8	8	8	8	8	8	8	8	8	8	8	8	8	8	8	8	8	8	8	8	8	8	8	8	8	8	8	8	8	8	8
P60842	EIF4A1	Eukaryotic initiation factor 4A-I	IF4A1_HUMAN	2.35e-18	13	13	13	13	13	13	0	13	0	13	13	13	13	13	13	13	13	13	13	0	13	13	13	13	13	13	13	13	13	13	13	13	0	13	13	13	13	13	13	13	13	13	13	13	13
P60866	RPS20	40S ribosomal protein S20	RS20_HUMAN	5.69e-07	2	0	2	2	0	0	0	0	0	2	0	2	2	2	2	2	0	0	2	0	0	0	0	2	2	2	2	2	2	2	2	2	0	2	2	2	2	0	0	0	0	0	2	0	0
P60900	PSMA6	Proteasome subunit alpha type-6	PSA6_HUMAN	1.44e-17	12	12	12	12	12	12	0	0	0	12	12	12	12	12	12	12	12	12	12	0	0	12	12	12	12	12	12	12	12	12	12	12	0	12	12	12	12	12	12	12	12	12	12	12	12
P60903	S100A10	Protein S100-A10	S10AA_HUMAN	4.9e-21	4	4	4	4	4	4	4	4	4	4	4	4	4	4	4	4	4	4	4	4	0	4	4	4	4	4	4	4	4	4	4	4	4	4	4	4	4	4	4	4	4	4	4	4	4
P60953	CDC42	Cell division control protein 42 homolog	CDC42_HUMAN	6.51e-25	6	6	6	6	6	6	6	6	6	6	6	6	6	6	6	6	6	6	6	0	0	6	6	6	6	6	6	6	6	6	6	6	0	6	6	6	6	6	6	6	6	6	6	6	6
P60981	DSTN	Destrin	DEST_HUMAN	6.04e-13	8	8	8	8	8	8	8	8	8	8	8	8	8	8	8	8	8	8	8	8	8	8	8	8	8	8	8	8	8	8	8	8	0	8	8	8	8	8	8	8	8	8	8	8	8
P60985	KRTDAP	Keratinocyte differentiation-associated protein	KTDAP_HUMAN	1.42e-12	0	0	0	0	0	0	0	0	0	3	0	3	3	3	0	3	3	0	0	0	0	3	0	0	3	3	3	0	0	3	0	0	0	3	3	3	3	0	3	0	0	0	3	0	0
P61019	RAB2A	Ras-related protein Rab-2A	RAB2A_HUMAN	3.91e-20	12	12	12	12	12	12	0	0	12	12	12	12	12	12	12	12	12	12	12	0	0	12	12	12	12	12	12	12	12	12	12	12	0	12	12	12	12	12	12	12	12	12	12	12	12
P61020	RAB5B	Ras-related protein Rab-5B	RAB5B_HUMAN	4.13e-25	5	5	5	5	0	5	5	5	0	5	5	5	5	5	5	5	5	5	5	0	0	5	5	5	5	5	5	5	5	5	5	5	5	5	5	5	5	5	5	5	5	5	5	5	5
P61026	RAB10	Ras-related protein Rab-10	RAB10_HUMAN	8.77e-21	4	4	4	4	4	4	0	0	4	4	4	4	4	4	4	4	4	4	4	0	0	4	4	4	4	4	4	4	4	4	4	4	0	4	4	4	4	4	4	4	4	4	4	4	4
P61086	UBE2K	Ubiquitin-conjugating enzyme E2 K	UBE2K_HUMAN	2.95e-06	2	0	2	2	0	2	0	0	0	0	2	2	2	2	2	0	0	0	2	0	0	0	0	0	2	2	2	2	2	2	0	0	0	0	0	2	2	2	0	0	0	0	2	0	0
P61088	UBE2N	Ubiquitin-conjugating enzyme E2 N	UBE2N_HUMAN	1.33e-24	7	7	7	7	7	7	0	7	0	7	7	7	7	7	7	7	7	7	7	0	0	7	7	7	7	7	7	7	7	7	7	7	7	7	7	7	7	7	7	7	7	7	7	7	7
P61106	RAB14	Ras-related protein Rab-14	RAB14_HUMAN	5.77e-19	9	9	9	9	9	9	0	0	0	9	9	9	9	9	9	9	9	9	9	0	0	9	9	9	9	9	9	9	9	9	9	9	0	9	9	9	9	9	9	9	9	9	9	9	9
P61158	ACTR3	Actin-related protein 3	ARP3_HUMAN	6.87e-24	14	14	14	14	14	14	14	14	0	14	14	14	14	14	14	14	14	14	14	0	0	14	14	14	14	14	14	14	14	14	14	14	14	14	14	14	14	14	14	14	14	14	14	14	14
P61160	ACTR2	Actin-related protein 2	ARP2_HUMAN	1.28e-22	8	8	8	8	8	8	0	0	8	8	8	8	8	8	8	8	8	8	8	8	0	8	0	0	8	8	8	8	8	8	8	8	0	8	8	8	8	8	8	8	8	8	8	8	8
P61163	ACTR1A	Alpha-centractin	ACTZ_HUMAN	1.87e-17	2	0	2	2	0	0	0	0	0	2	2	2	2	2	2	2	2	2	0	0	0	0	2	0	2	2	0	0	2	2	0	0	0	2	2	2	2	2	2	2	0	0	2	0	0
P61201	COPS2	COP9 signalosome complex subunit 2	CSN2_HUMAN	7.22e-05	0	0	0	0	0	0	0	0	0	0	0	0	2	2	2	0	0	0	0	0	0	0	0	0	0	0	0	0	0	0	0	0	0	0	0	0	0	0	0	0	0	0	0	0	0
P61204;P84077	ARF3;ARF1	ADP-ribosylation factor 3;ADP-ribosylation factor 1	ARF3_HUMAN;ARF1_HUMAN	7.85e-27	7	7	7	7	7	7	7	7	0	7	7	7	7	7	7	7	7	7	7	0	0	7	7	7	7	7	7	7	7	7	7	7	0	7	7	7	7	7	7	7	7	7	7	7	7
P61224	RAP1B	Ras-related protein Rap-1b	RAP1B_HUMAN	3.23e-28	8	8	8	8	8	8	8	8	8	8	8	8	8	8	8	8	8	8	8	0	0	8	8	8	8	8	8	8	8	8	8	8	8	8	8	8	8	8	8	8	8	8	8	8	8
P61225	RAP2B	Ras-related protein Rap-2b	RAP2B_HUMAN	1.19e-22	3	3	3	0	0	0	0	0	0	3	0	3	3	3	3	0	3	0	3	0	0	3	3	3	3	3	3	3	3	3	3	3	0	3	3	3	3	3	3	3	3	3	3	3	3
P61247	RPS3A	40S ribosomal protein S3a	RS3A_HUMAN	4.04e-17	0	8	8	0	0	0	0	0	0	8	0	8	8	8	8	0	8	8	8	0	0	8	8	8	8	8	8	8	8	8	0	0	0	8	8	8	8	8	0	0	0	0	8	0	8
P61254;Q9UNX3	RPL26;RPL26L1	60S ribosomal protein L26;60S ribosomal protein L26-like 1	RL26_HUMAN;RL26L_HUMAN	7.83e-09	0	2	0	0	0	0	2	0	0	2	2	0	2	2	2	0	2	2	0	0	2	2	2	2	2	2	2	2	0	0	0	0	0	2	2	2	0	2	0	0	0	0	2	0	0
P61313	RPL15	60S ribosomal protein L15	RL15_HUMAN	2.09e-14	0	0	0	0	0	0	0	0	0	3	0	0	3	3	3	0	0	0	0	0	0	0	0	0	3	3	3	3	3	3	0	3	0	3	0	3	3	0	3	3	0	0	3	0	0
P61421	ATP6V0D1	V-type proton ATPase subunit d 1	VA0D1_HUMAN	1.04e-18	5	5	5	5	5	5	0	0	0	5	5	5	5	5	5	5	5	5	5	0	0	5	5	5	5	5	5	5	5	5	5	5	0	5	5	5	5	5	5	5	5	5	5	5	0
P61457	PCBD1	Pterin-4-alpha-carbinolamine dehydratase	PHS_HUMAN	2.14e-23	5	5	5	5	5	5	5	0	0	5	5	5	5	5	5	5	5	5	5	5	5	5	5	5	5	5	5	5	5	5	5	5	5	5	5	5	5	5	5	5	5	5	5	5	5
P61586	RHOA	Transforming protein RhoA	RHOA_HUMAN	2.87e-25	6	6	6	6	6	6	6	0	0	6	6	6	6	6	6	6	6	6	6	0	0	6	6	6	6	6	6	6	6	6	6	6	6	6	6	6	6	6	6	6	6	6	6	6	6
P61604	HSPE1	10 kDa heat shock protein, mitochondrial	CH10_HUMAN	1.23e-19	7	7	7	7	7	7	7	7	7	7	7	7	7	7	7	7	7	7	7	7	7	7	7	7	7	7	7	7	7	7	7	7	7	7	7	7	7	7	7	7	7	7	7	7	7
P61626	LYZ	Lysozyme C	LYSC_HUMAN	3.86e-26	10	10	10	10	10	10	10	10	10	10	10	10	10	10	10	10	10	10	10	10	10	10	10	10	10	10	10	10	10	10	10	10	10	10	10	10	10	10	10	10	10	10	10	10	10
P61769	B2M	Beta-2-microglobulin	B2MG_HUMAN	1.89e-19	4	4	4	4	4	4	4	4	4	4	4	4	4	4	4	4	4	4	4	4	4	4	4	4	4	4	4	4	4	4	4	4	4	4	4	4	4	4	4	4	4	4	4	4	4
P61803	DAD1	Dolichyl-diphosphooligosaccharide--protein glycosyltransferase subunit DAD1	DAD1_HUMAN	1.98e-07	0	0	3	3	0	0	0	0	0	0	0	3	3	3	3	0	0	0	3	0	0	0	3	0	0	3	3	3	3	3	3	0	0	0	3	3	3	0	3	0	0	0	3	0	0
P61916	NPC2	NPC intracellular cholesterol transporter 2	NPC2_HUMAN	1.52e-23	11	11	11	11	11	11	11	11	11	11	11	11	11	11	11	11	11	11	11	11	11	11	11	11	11	11	11	11	11	11	11	11	11	11	11	11	11	11	11	11	11	11	11	11	11
P61923	COPZ1	Coatomer subunit zeta-1	COPZ1_HUMAN	1.32e-11	3	3	3	0	3	3	0	0	0	3	0	3	3	3	3	3	3	0	3	0	0	0	0	0	3	3	3	3	3	3	3	3	0	3	3	3	3	3	3	3	3	0	3	0	0
P61970	NUTF2	Nuclear transport factor 2	NTF2_HUMAN	7.06e-17	6	6	6	6	6	6	6	6	6	6	6	6	6	6	6	6	6	6	6	6	6	6	6	6	6	6	6	6	6	6	6	6	6	6	6	6	6	6	6	6	6	6	6	6	6
P61978	HNRNPK	Heterogeneous nuclear ribonucleoprotein K	HNRPK_HUMAN	3.05e-28	11	11	11	11	11	11	0	0	0	11	11	11	11	11	11	11	11	11	11	0	0	11	11	11	11	11	11	11	11	11	11	11	11	11	11	11	11	11	11	11	11	0	11	11	0
P61981	YWHAG	14-3-3 protein gamma	1433G_HUMAN	6.38e-13	5	5	5	5	5	5	5	5	0	5	5	5	5	5	5	5	5	5	5	5	0	5	5	5	5	5	5	5	5	5	5	5	0	5	5	5	5	5	5	0	0	5	5	5	5
P62070	RRAS2	Ras-related protein R-Ras2	RRAS2_HUMAN	6.76e-15	2	2	2	0	0	0	0	0	0	2	0	0	2	2	2	2	2	2	2	0	0	0	0	0	2	2	2	2	2	2	2	2	0	2	2	2	2	2	2	2	2	0	2	2	2
P62081	RPS7	40S ribosomal protein S7	RS7_HUMAN	8.63e-19	2	2	2	2	2	0	0	0	0	2	2	2	2	2	2	0	2	0	2	0	0	2	0	0	2	2	2	2	2	2	2	0	0	2	2	2	0	0	0	2	0	0	2	0	0
P62140	PPP1CB	Serine/threonine-protein phosphatase PP1-beta catalytic subunit	PP1B_HUMAN	8.29e-19	11	11	11	11	11	11	0	0	0	11	11	11	11	11	11	11	11	11	11	0	0	11	11	11	11	11	11	11	11	11	0	0	0	11	11	11	11	11	11	11	0	0	11	0	0
P62241	RPS8	40S ribosomal protein S8	RS8_HUMAN	8.69e-15	7	7	7	7	7	7	0	0	0	7	7	7	7	7	7	7	7	0	7	0	0	7	7	7	7	7	7	7	7	7	7	7	0	7	7	7	7	7	7	0	0	7	7	7	7
P62244	RPS15A	40S ribosomal protein S15a	RS15A_HUMAN	2.97e-25	3	3	3	0	0	0	0	0	0	0	0	0	3	3	3	0	0	0	0	0	0	3	0	0	3	3	3	3	3	3	3	3	0	3	3	3	3	3	0	0	0	0	3	0	0
P62249	RPS16	40S ribosomal protein S16	RS16_HUMAN	3.02e-24	6	6	6	0	6	6	0	0	0	6	6	6	6	6	6	6	6	6	6	0	0	6	6	6	6	6	6	6	6	6	6	6	0	6	6	6	6	6	6	6	6	6	6	6	6
P62253	UBE2G1	Ubiquitin-conjugating enzyme E2 G1	UB2G1_HUMAN	2.75e-06	2	0	0	2	2	2	0	0	0	2	2	2	2	2	2	0	0	0	2	0	0	0	0	0	2	2	2	2	2	2	0	0	0	2	2	2	0	2	0	0	0	0	2	0	0
P62256	UBE2H	Ubiquitin-conjugating enzyme E2 H	UBE2H_HUMAN	1.51e-14	0	0	0	0	0	0	0	0	0	0	0	0	2	2	2	0	0	0	2	0	0	0	0	0	0	0	0	0	2	0	0	0	0	0	0	0	0	0	0	0	0	0	0	0	0
P62258	YWHAE	14-3-3 protein epsilon	1433E_HUMAN	3.03e-25	17	17	17	17	17	17	17	17	17	17	17	17	17	17	17	17	17	17	17	17	17	17	17	17	17	17	17	17	17	17	17	17	17	17	17	17	17	17	17	17	17	17	17	17	17
P62263	RPS14	40S ribosomal protein S14	RS14_HUMAN	5.98e-29	3	0	3	0	0	0	3	0	0	3	3	0	3	3	3	3	3	3	3	3	0	3	3	0	3	3	3	3	3	3	3	3	0	3	3	3	3	0	3	0	0	0	3	0	0
P62269	RPS18	40S ribosomal protein S18	RS18_HUMAN	2.51e-22	3	3	3	3	3	0	0	0	0	3	3	3	3	3	3	3	0	0	3	0	0	3	3	3	3	3	3	3	3	3	3	3	0	3	3	3	3	3	3	3	3	0	3	0	3
P62277	RPS13	40S ribosomal protein S13	RS13_HUMAN	3.41e-18	4	4	4	4	4	4	0	0	0	4	4	4	4	4	4	4	4	0	4	0	0	4	4	4	4	4	4	4	4	4	0	0	0	4	4	4	4	4	4	0	4	0	4	0	0
P62280	RPS11	40S ribosomal protein S11	RS11_HUMAN	4.26e-13	4	4	0	0	0	0	0	0	0	4	0	4	4	4	4	0	4	0	4	0	0	4	4	4	4	4	4	4	4	4	4	0	0	4	0	4	4	4	4	0	0	0	4	0	4
P62310	LSM3	U6 snRNA-associated Sm-like protein LSm3	LSM3_HUMAN	4.7e-17	2	2	2	2	2	2	2	0	0	2	2	2	2	2	2	0	0	0	2	0	0	2	2	2	2	2	2	2	2	2	2	2	0	2	2	2	2	2	2	0	0	0	2	0	0
P62316	SNRPD2	Small nuclear ribonucleoprotein Sm D2	SMD2_HUMAN	2.47e-07	0	3	3	0	0	0	0	0	0	3	3	3	3	3	3	0	0	0	3	0	0	3	3	0	3	3	3	3	3	0	0	0	0	3	0	0	3	0	0	0	0	0	3	0	0
P62318	SNRPD3	Small nuclear ribonucleoprotein Sm D3	SMD3_HUMAN	1.35e-23	2	2	2	2	2	2	0	0	0	2	2	2	2	2	2	0	2	2	2	0	0	2	2	2	2	2	2	2	2	2	2	2	0	2	2	2	2	2	2	0	0	0	2	0	0
P62328	TMSB4X	Thymosin beta-4	TYB4_HUMAN	7.84e-22	7	7	7	7	7	7	7	7	7	7	7	7	7	7	7	7	7	7	7	7	7	7	7	7	7	7	7	7	7	7	7	7	7	7	7	7	7	7	7	7	7	7	7	7	7
P62330	ARF6	ADP-ribosylation factor 6	ARF6_HUMAN	5.26e-26	4	4	4	4	4	4	0	0	0	4	4	4	4	4	4	4	4	4	4	0	0	4	4	4	4	4	4	4	4	4	4	4	0	4	4	4	4	4	4	4	4	4	4	4	4
P62333	PSMC6	26S proteasome regulatory subunit 10B	PRS10_HUMAN	7.68e-13	3	0	3	3	0	3	0	0	0	3	3	3	3	3	3	0	0	0	3	0	0	0	0	0	3	3	3	3	3	3	0	0	0	3	3	3	3	3	3	3	0	0	3	3	3
P62424	RPL7A	60S ribosomal protein L7a	RL7A_HUMAN	7.8e-09	6	6	6	0	0	0	6	6	6	0	0	6	6	6	6	6	6	6	6	0	0	0	6	0	6	6	6	6	6	6	6	6	6	6	6	6	0	0	6	0	0	0	6	0	0
P62495	ETF1	Eukaryotic peptide chain release factor subunit 1	ERF1_HUMAN	4.98e-14	4	0	0	0	4	4	0	0	0	4	4	4	4	4	4	0	4	0	4	0	0	0	0	0	4	4	4	4	4	4	0	0	0	4	4	4	4	4	0	4	0	0	4	0	0
P62701	RPS4X	40S ribosomal protein S4, X isoform	RS4X_HUMAN	9.07e-18	7	7	7	7	7	0	7	7	7	7	7	7	7	7	7	7	7	0	7	7	7	7	7	7	7	7	7	7	7	7	7	7	0	7	7	7	7	7	7	7	7	7	7	7	7
P62714;P67775	PPP2CB;PPP2CA	Serine/threonine-protein phosphatase 2A catalytic subunit beta isoform;Serine/threonine-protein phosphatase 2A catalytic subunit alpha isoform	PP2AB_HUMAN;PP2AA_HUMAN	1.61e-18	5	5	5	5	5	5	0	0	5	5	5	5	5	5	5	0	5	0	5	0	5	5	5	5	5	5	5	5	5	5	5	5	0	5	5	5	5	5	5	5	5	5	5	5	0
P62750	RPL23A	60S ribosomal protein L23a	RL23A_HUMAN	3.1e-10	2	2	2	2	0	0	0	0	0	0	2	2	2	2	2	2	2	0	2	0	0	2	0	2	2	2	2	0	0	2	0	0	0	2	2	2	0	0	0	0	0	2	2	0	0
P62753	RPS6	40S ribosomal protein S6	RS6_HUMAN	4.94e-17	4	4	4	0	0	0	0	0	0	4	4	0	4	4	4	4	4	4	4	4	0	4	4	4	4	4	4	4	4	4	4	4	0	4	0	4	4	4	4	0	0	0	4	0	0
P62760	VSNL1	Visinin-like protein 1	VISL1_HUMAN	3.62e-20	4	4	4	4	4	4	0	0	0	4	4	4	4	4	4	0	4	0	4	0	0	4	4	4	4	4	4	4	4	4	4	0	0	0	4	4	4	4	4	4	0	0	4	0	0
P62805	HIST1H4A	Histone H4	H4_HUMAN	5.3e-28	9	9	9	9	9	9	9	9	9	9	9	9	9	9	9	9	9	9	9	9	9	9	9	9	9	9	9	9	9	9	9	9	9	9	9	9	9	9	9	9	9	9	9	9	9
P62820	RAB1A	Ras-related protein Rab-1A	RAB1A_HUMAN	3.18e-18	4	4	4	4	4	4	0	0	0	4	4	4	4	4	4	4	4	4	4	0	0	4	4	4	4	4	4	4	4	4	4	4	0	4	4	4	4	4	4	4	4	4	4	4	4
P62826	RAN	GTP-binding nuclear protein Ran	RAN_HUMAN	4.02e-20	7	7	7	7	7	7	0	0	0	7	7	7	7	7	7	7	7	7	7	0	0	0	7	0	7	7	7	7	7	7	7	7	0	7	7	7	7	7	7	7	7	7	7	7	7
P62829	RPL23	60S ribosomal protein L23	RL23_HUMAN	5.46e-09	0	0	0	0	0	0	0	0	0	2	0	0	2	2	2	0	2	2	2	0	0	2	2	0	2	2	2	2	2	2	2	2	0	2	0	2	0	0	0	0	0	0	2	0	0
P62834	RAP1A	Ras-related protein Rap-1A	RAP1A_HUMAN	6.04e-21	2	2	2	2	2	2	0	2	0	2	2	2	2	2	2	2	2	2	2	0	0	2	2	2	2	2	2	2	2	2	2	2	0	2	2	2	2	2	2	2	2	2	2	2	2
P62851	RPS25	40S ribosomal protein S25	RS25_HUMAN	1.38e-14	2	2	2	0	0	0	0	0	0	2	2	2	2	2	2	2	2	2	2	2	0	2	2	2	2	2	2	2	2	2	2	0	0	2	2	2	2	2	2	0	0	0	2	0	0
P62857	RPS28	40S ribosomal protein S28	RS28_HUMAN	2.57e-18	3	3	3	3	3	0	0	0	0	3	3	3	3	3	3	3	3	3	3	3	0	3	3	3	3	3	3	3	3	3	3	3	0	3	3	3	3	0	3	3	3	3	3	3	3
P62873	GNB1	Guanine nucleotide-binding protein G(I)/G(S)/G(T) subunit beta-1	GBB1_HUMAN	2.85e-17	6	6	6	6	6	6	6	6	6	6	6	6	6	6	6	6	6	6	6	0	0	6	6	6	6	6	6	6	6	6	6	6	6	6	6	6	6	6	6	6	6	6	6	6	6
P62879	GNB2	Guanine nucleotide-binding protein G(I)/G(S)/G(T) subunit beta-2	GBB2_HUMAN	4.68e-18	11	11	11	11	11	11	11	11	11	11	11	11	11	11	11	11	11	11	11	0	0	11	11	11	11	11	11	11	11	11	11	11	11	11	11	11	11	11	11	11	11	11	11	11	11
P62888	RPL30	60S ribosomal protein L30	RL30_HUMAN	2.75e-24	3	0	0	0	0	0	0	0	0	3	0	3	3	3	3	3	3	3	3	0	0	3	3	3	3	3	3	3	3	3	0	3	0	3	3	3	3	3	3	0	0	0	3	0	0
P62906	RPL10A	60S ribosomal protein L10a	RL10A_HUMAN	9.86e-13	6	6	6	6	6	6	0	0	0	6	6	6	6	6	6	6	6	6	6	0	0	0	0	6	6	6	6	6	6	6	6	6	0	6	6	6	6	0	6	6	6	6	6	6	6
P62913	RPL11	60S ribosomal protein L11	RL11_HUMAN	2.05e-10	2	2	2	0	0	0	0	0	0	0	0	0	2	2	2	0	2	0	2	0	0	0	2	2	2	2	2	2	2	2	2	2	0	2	2	2	2	2	2	0	0	0	2	0	0
P62917	RPL8	60S ribosomal protein L8	RL8_HUMAN	5.96e-10	2	2	2	0	0	0	0	0	0	0	2	2	2	2	2	2	2	2	2	0	0	2	2	2	2	2	2	2	2	2	2	2	0	2	0	2	2	2	2	0	0	0	2	0	2
P62937	PPIA	Peptidyl-prolyl cis-trans isomerase A	PPIA_HUMAN	4.54e-25	11	11	11	11	11	11	11	11	11	11	11	11	11	11	11	11	11	11	11	11	11	11	11	11	11	11	11	11	11	11	11	11	11	11	11	11	11	11	11	11	11	11	11	11	11
P62942	FKBP1A	Peptidyl-prolyl cis-trans isomerase FKBP1A	FKB1A_HUMAN	9e-16	3	3	3	3	3	3	0	3	3	3	3	3	3	3	3	3	3	3	3	3	3	3	3	3	3	3	3	3	3	3	0	0	0	3	3	3	3	3	3	3	3	3	3	3	0
P62979	RPS27A	Ubiquitin-40S ribosomal protein S27a	RS27A_HUMAN	4.26e-17	12	12	12	12	12	12	12	12	12	12	12	12	12	12	12	12	12	12	12	12	12	12	12	12	12	12	12	12	12	12	12	12	12	12	12	12	12	12	12	12	12	12	12	12	12
P62993	GRB2	Growth factor receptor-bound protein 2	GRB2_HUMAN	5.06e-12	6	6	6	6	6	6	6	6	6	6	6	6	6	6	6	6	6	6	6	6	6	6	6	6	6	6	6	6	6	6	6	6	0	6	6	6	6	6	6	6	6	6	6	6	6
P63000	RAC1	Ras-related C3 botulinum toxin substrate 1	RAC1_HUMAN	2.48e-26	7	7	7	7	7	7	7	7	7	7	7	7	7	7	7	7	7	7	7	7	0	7	7	7	7	7	7	7	7	7	7	7	7	7	7	7	7	7	7	7	7	7	7	7	7
P63010	AP2B1	AP-2 complex subunit beta	AP2B1_HUMAN	2.61e-06	0	0	0	4	4	0	0	0	0	4	4	4	4	4	4	4	4	4	4	0	0	4	0	4	4	4	4	4	4	4	0	0	0	4	4	4	4	4	4	0	0	0	4	0	0
P63092;Q5JWF2	GNAS	Guanine nucleotide-binding protein G(s) subunit alpha isoforms short;Guanine nucleotide-binding protein G(s) subunit alpha isoforms XLas	GNAS2_HUMAN;GNAS1_HUMAN	1.92e-24	9	9	9	9	9	9	0	9	0	9	9	9	9	9	9	9	9	9	9	0	0	9	9	9	9	9	9	9	9	9	9	9	0	9	9	9	9	9	9	9	9	9	9	9	9
P63096	GNAI1	Guanine nucleotide-binding protein G(i) subunit alpha-1	GNAI1_HUMAN	1.67e-16	2	2	2	2	0	2	0	0	0	2	2	2	2	2	2	2	2	2	2	0	0	2	0	2	2	2	2	2	2	2	2	0	0	2	2	2	2	2	2	2	0	2	2	2	0
P63104	YWHAZ	14-3-3 protein zeta/delta	1433Z_HUMAN	3.5e-21	14	14	14	14	14	14	14	14	14	14	14	14	14	14	14	14	14	14	14	0	0	14	14	14	14	14	14	14	14	14	14	14	14	14	14	14	14	14	14	14	14	14	14	14	14
P63151	PPP2R2A	Serine/threonine-protein phosphatase 2A 55 kDa regulatory subunit B alpha isoform	2ABA_HUMAN	4.95e-19	3	3	3	3	0	0	0	0	0	3	0	3	3	3	3	0	0	0	3	0	0	3	3	0	0	3	0	3	3	3	0	0	0	3	3	3	3	3	3	3	0	0	3	0	0
P63167	DYNLL1	Dynein light chain 1, cytoplasmic	DYL1_HUMAN	2.18e-19	4	4	4	0	4	4	0	0	0	4	4	4	4	4	4	4	4	4	4	0	0	4	0	4	4	4	4	4	4	4	4	4	0	4	4	4	4	4	4	4	4	4	4	4	4
P63208	SKP1	S-phase kinase-associated protein 1	SKP1_HUMAN	1.51e-12	5	5	5	5	5	5	5	5	0	5	5	5	5	5	5	5	5	5	5	0	0	5	5	5	5	5	5	5	5	5	5	5	0	5	5	5	5	5	5	5	5	5	5	5	5
P63241	EIF5A	Eukaryotic translation initiation factor 5A-1	IF5A1_HUMAN	4.41e-23	8	8	8	8	8	8	8	8	8	8	8	8	8	8	8	8	8	8	8	8	8	8	8	8	8	8	8	8	8	8	8	8	0	8	8	8	8	8	8	8	8	8	8	8	8
P63244	RACK1	Receptor of activated protein C kinase 1	RACK1_HUMAN	5.44e-27	10	10	10	0	10	10	0	0	0	10	10	10	10	10	10	10	10	10	10	0	0	10	10	10	10	10	10	10	10	10	10	10	0	10	10	10	10	10	10	10	0	10	10	10	10
P63261	ACTG1	Actin, cytoplasmic 2	ACTG_HUMAN	9.97e-26	24	24	24	24	24	24	24	24	24	24	24	24	24	24	24	24	24	24	24	24	24	24	24	24	24	24	24	24	24	24	24	24	24	24	24	24	24	24	24	24	24	24	24	24	24
P63279	UBE2I	SUMO-conjugating enzyme UBC9	UBC9_HUMAN	7.33e-07	2	0	2	2	2	0	0	0	0	2	2	2	2	2	2	2	0	0	2	0	0	2	2	0	2	2	2	2	2	2	0	2	0	2	2	0	2	2	2	0	2	2	2	0	0
P67809	YBX1	Nuclease-sensitive element-binding protein 1	YBOX1_HUMAN	2.78e-07	0	0	2	0	0	0	0	0	0	0	0	0	2	0	2	2	0	2	2	2	2	2	2	2	2	2	2	0	0	2	2	0	0	2	2	0	0	0	0	0	0	0	2	0	0
P67812	SEC11A	Signal peptidase complex catalytic subunit SEC11A	SC11A_HUMAN	8.16e-14	0	0	0	0	0	0	0	0	0	0	0	0	2	2	2	0	0	0	0	0	0	0	0	0	0	0	2	2	2	2	0	0	0	2	0	0	2	0	2	2	2	2	2	2	0
P67936	TPM4	Tropomyosin alpha-4 chain	TPM4_HUMAN	1.06e-22	16	16	16	16	16	16	16	16	16	16	16	16	16	16	16	16	16	16	16	16	16	16	16	16	16	16	16	16	16	16	16	16	16	16	16	16	16	16	16	16	16	16	16	16	16
P68032;P68133	ACTC1;ACTA1	Actin, alpha cardiac muscle 1;Actin, alpha skeletal muscle	ACTC_HUMAN;ACTS_HUMAN	1.34e-18	3	3	3	3	3	3	3	3	0	3	3	3	3	3	3	3	3	3	3	3	3	3	3	3	3	3	3	3	3	3	3	3	0	3	3	3	3	3	3	3	3	3	3	3	3
P68036	UBE2L3	Ubiquitin-conjugating enzyme E2 L3	UB2L3_HUMAN	3.71e-15	4	4	4	4	4	4	4	0	0	4	4	4	4	4	4	4	0	4	4	0	0	4	4	4	4	4	4	4	4	4	4	0	0	4	4	4	4	4	4	4	4	0	4	4	4
P68104	EEF1A1	Elongation factor 1-alpha 1	EF1A1_HUMAN	4.86e-25	15	15	15	15	15	15	15	15	15	15	15	15	15	15	15	15	15	15	15	15	15	15	15	15	15	15	15	15	15	15	15	15	15	15	15	15	15	15	15	15	15	15	15	15	15
P68363	TUBA1B	Tubulin alpha-1B chain	TBA1B_HUMAN	2.26e-21	18	18	18	18	18	18	18	0	18	18	18	18	18	18	18	18	18	18	18	18	18	18	18	18	18	18	18	18	18	18	18	18	18	18	18	18	18	18	18	18	18	18	18	18	18
P68366	TUBA4A	Tubulin alpha-4A chain	TBA4A_HUMAN	9.83e-20	3	3	3	3	3	3	0	0	0	3	3	3	3	3	3	3	3	3	3	0	0	3	3	3	3	3	3	3	3	3	3	3	0	3	3	3	3	3	3	3	3	0	3	0	3
P68371	TUBB4B	Tubulin beta-4B chain	TBB4B_HUMAN	2.27e-23	16	16	16	16	16	16	16	16	16	16	16	16	16	16	16	16	16	16	16	16	16	16	16	16	16	16	16	16	16	16	16	16	0	16	16	16	16	16	16	16	16	16	16	16	16
P68402	PAFAH1B2	Platelet-activating factor acetylhydrolase IB subunit beta	PA1B2_HUMAN	2.28e-24	2	2	2	2	2	2	0	0	0	2	2	2	2	2	2	0	0	0	2	0	0	2	2	2	2	2	2	2	2	2	2	2	0	2	2	2	2	2	2	2	2	2	2	2	2
P68431;P84243;Q16695;Q71DI3	HIST1H3A;H3F3A;HIST3H3;HIST2H3A	Histone H3.1;Histone H3.3;Histone H3.1t;Histone H3.2	H31_HUMAN;H33_HUMAN;H31T_HUMAN;H32_HUMAN	3.12e-24	4	4	4	4	4	4	4	4	4	4	4	4	4	4	4	4	4	4	4	4	4	4	4	4	4	4	4	4	4	4	4	4	4	4	4	4	4	4	4	4	4	4	4	4	4
P68871	HBB	Hemoglobin subunit beta	HBB_HUMAN	2.29e-21	19	19	19	19	19	19	19	19	19	19	19	19	19	19	19	19	19	19	19	19	19	19	19	19	19	19	19	19	19	19	19	19	19	19	19	19	19	19	19	19	19	19	19	19	19
P69849;Q15155;Q5JPE7	NOMO3;NOMO1;NOMO2	Nodal modulator 3;Nodal modulator 1;Nodal modulator 2	NOMO3_HUMAN;NOMO1_HUMAN;NOMO2_HUMAN	1.94e-22	4	4	4	4	4	4	4	0	0	4	4	4	4	4	4	0	4	0	4	0	0	4	4	4	4	4	4	4	4	4	4	4	0	4	4	4	4	4	4	4	4	4	4	4	0
P69891	HBG1	Hemoglobin subunit gamma-1	HBG1_HUMAN	8.75e-21	14	14	14	14	14	14	14	14	14	14	14	14	14	14	14	14	14	14	14	0	14	14	14	14	14	14	14	14	14	14	14	14	0	14	14	14	14	14	14	14	14	14	14	14	14
P69905	HBA1	Hemoglobin subunit alpha	HBA_HUMAN	3.8e-28	14	14	14	14	14	14	14	14	14	14	14	14	14	14	14	14	14	14	14	14	14	14	14	14	14	14	14	14	14	14	14	14	14	14	14	14	14	14	14	14	14	14	14	14	14
P78324	SIRPA	Tyrosine-protein phosphatase non-receptor type substrate 1	SHPS1_HUMAN	3.02e-20	19	19	19	19	19	19	19	19	19	19	19	19	19	19	19	19	19	19	19	19	19	19	19	19	19	19	19	19	19	19	19	19	19	19	19	19	19	19	19	19	19	19	19	19	19
P78330	PSPH	Phosphoserine phosphatase	SERB_HUMAN	3.62e-15	0	0	0	5	5	5	0	0	0	5	5	5	5	5	5	5	5	5	5	0	0	5	5	5	5	5	5	5	5	5	5	0	0	5	0	5	5	5	5	5	5	5	5	5	5
P78371	CCT2	T-complex protein 1 subunit beta	TCPB_HUMAN	1.97e-22	11	11	11	11	11	11	0	0	0	11	11	11	11	11	11	11	11	11	11	0	0	11	11	11	11	11	11	11	11	11	11	0	0	11	11	11	11	11	11	11	11	11	11	11	11
P78380	OLR1	Oxidized low-density lipoprotein receptor 1	OLR1_HUMAN	3.66e-22	8	8	8	8	8	8	8	8	8	8	8	8	8	8	8	8	8	8	8	0	0	8	8	8	8	8	8	8	8	8	8	0	0	8	8	8	8	8	8	8	8	8	8	8	8
P78417	GSTO1	Glutathione S-transferase omega-1	GSTO1_HUMAN	1.26e-23	15	15	15	15	15	15	15	15	15	15	15	15	15	15	15	15	15	15	15	15	15	15	15	15	15	15	15	15	15	15	15	15	15	15	15	15	15	15	15	15	15	15	15	15	15
P78423	CX3CL1	Fractalkine	X3CL1_HUMAN	6.31e-19	3	3	3	3	3	3	3	3	3	3	3	3	3	0	0	3	3	3	3	3	3	3	3	3	3	0	3	3	3	3	3	3	3	3	3	3	3	3	3	3	3	3	3	3	3
P78504	JAG1	Protein jagged-1	JAG1_HUMAN	3.98e-22	9	9	9	9	9	9	9	9	9	9	9	9	9	9	9	9	9	9	9	9	9	9	9	9	9	9	9	9	9	9	9	9	0	9	9	9	9	9	9	9	9	9	9	9	9
P78527	PRKDC	DNA-dependent protein kinase catalytic subunit	PRKDC_HUMAN	5.63e-07	5	5	5	5	5	5	0	0	0	5	5	5	5	5	5	5	5	0	5	0	0	5	5	5	5	5	5	5	5	5	5	5	0	5	5	5	5	0	5	0	0	0	5	0	0
P78552	IL13RA1	Interleukin-13 receptor subunit alpha-1	I13R1_HUMAN	4.62e-24	6	6	6	6	6	6	6	6	6	6	6	6	6	6	6	6	6	6	6	6	6	6	6	6	6	6	6	6	6	6	6	6	6	6	6	6	6	6	6	6	6	6	6	6	6
P80108	GPLD1	Phosphatidylinositol-glycan-specific phospholipase D	PHLD_HUMAN	9.57e-17	5	5	5	5	5	5	0	0	0	5	5	5	5	5	5	0	0	5	5	0	0	0	0	0	0	0	5	5	5	0	0	0	0	5	5	5	0	0	0	0	0	0	5	0	0
P80188	LCN2	Neutrophil gelatinase-associated lipocalin	NGAL_HUMAN	5.75e-22	14	14	14	14	14	14	14	14	14	14	14	14	14	14	14	14	14	14	14	14	14	14	14	14	14	14	14	14	14	14	14	14	14	14	14	14	14	14	14	14	14	14	14	14	14
P80303	NUCB2	Nucleobindin-2	NUCB2_HUMAN	2.99e-16	10	10	10	10	10	10	10	10	0	10	10	10	10	10	10	10	10	10	10	10	10	10	10	10	10	10	10	10	10	10	10	0	0	10	10	10	10	10	10	10	10	10	10	10	10
P80370	DLK1	Protein delta homolog 1	DLK1_HUMAN	3.62e-22	7	7	7	7	7	7	7	7	7	7	7	7	7	7	7	7	7	7	7	7	7	7	7	7	7	7	7	7	7	7	7	7	7	7	7	7	7	7	7	7	7	7	7	7	7
P80511	S100A12	Protein S100-A12	S10AC_HUMAN	6.45e-14	4	4	4	4	0	4	4	4	0	4	4	4	4	4	4	0	4	4	4	0	0	4	0	0	4	4	4	4	4	4	0	0	0	4	0	0	0	0	0	0	0	0	4	0	0
P80723	BASP1	Brain acid soluble protein 1	BASP1_HUMAN	1.12e-13	7	7	7	7	7	7	7	7	7	7	7	7	7	7	7	7	7	7	7	7	7	7	7	7	7	7	7	7	7	7	7	7	7	7	7	7	7	7	7	7	7	7	7	7	7
P80748	IGLV3-21	Immunoglobulin lambda variable 3-21	LV321_HUMAN	5.68e-21	6	6	6	6	6	6	6	6	6	6	6	6	6	6	6	6	6	6	6	6	6	6	6	6	6	6	6	6	6	6	6	6	6	6	6	6	6	6	6	6	6	6	6	6	6
P81172	HAMP	Hepcidin	HEPC_HUMAN	9.89e-17	2	2	2	2	2	2	2	2	2	2	2	2	2	2	2	2	2	2	2	2	2	2	2	2	2	2	2	2	2	2	2	2	0	2	2	2	2	2	2	2	2	2	2	2	2
P81605	DCD	Dermcidin	DCD_HUMAN	2e-25	5	5	5	5	5	5	5	5	5	5	5	5	5	5	5	5	5	5	5	5	5	5	5	5	5	5	5	5	5	5	5	5	5	5	5	5	5	5	5	5	5	5	5	5	5
P82980	RBP5	Retinol-binding protein 5	RET5_HUMAN	5.44e-17	8	8	8	8	8	8	8	0	0	8	8	8	8	8	8	8	8	8	8	8	0	8	8	8	8	8	8	8	8	8	8	8	0	8	8	8	8	8	8	8	8	8	8	8	8
P82987	ADAMTSL3	ADAMTS-like protein 3	ATL3_HUMAN	1.15e-06	3	0	3	0	0	0	3	3	3	3	3	3	3	3	3	0	3	3	3	3	3	3	3	3	3	3	3	3	3	3	3	3	0	3	3	3	3	3	3	3	3	3	3	3	3
P83110	HTRA3	Serine protease HTRA3	HTRA3_HUMAN	1.41e-23	4	4	4	4	4	0	4	4	4	4	4	4	4	4	4	4	4	4	4	4	4	4	4	4	4	4	4	4	4	4	4	4	4	4	4	4	4	4	4	4	4	4	4	4	4
P83731	RPL24	60S ribosomal protein L24	RL24_HUMAN	5.53e-20	2	2	0	0	0	0	0	0	0	0	0	0	2	2	2	0	0	0	2	0	0	0	2	0	2	2	2	2	2	2	0	2	0	0	0	2	2	0	0	0	0	0	2	0	0
P84095	RHOG	Rho-related GTP-binding protein RhoG	RHOG_HUMAN	3.3e-21	2	2	2	0	0	2	0	0	0	2	2	2	2	2	2	2	2	2	2	0	0	0	0	0	2	2	2	2	2	2	0	0	0	2	2	2	2	2	2	2	2	2	2	2	2
P84103	SRSF3	Serine/arginine-rich splicing factor 3	SRSF3_HUMAN	2.46e-05	0	0	0	0	0	0	0	0	0	0	0	0	2	2	2	0	0	0	2	0	0	0	0	0	2	2	2	0	2	2	0	2	0	2	0	0	0	0	0	0	2	0	2	0	0
P98088	MUC5AC	Mucin-5AC	MUC5A_HUMAN	2.35e-13	0	7	0	7	7	7	7	7	7	7	0	7	7	7	7	7	7	7	7	0	0	7	7	7	7	7	7	7	7	7	0	0	0	7	7	7	0	0	7	7	0	0	7	7	7
P98095	FBLN2	Fibulin-2	FBLN2_HUMAN	5.98e-29	16	16	16	16	16	16	16	16	16	16	16	16	16	16	16	16	16	16	16	16	16	16	16	16	16	16	16	16	16	16	16	16	16	16	16	16	16	16	16	16	16	16	16	16	16
P98160	HSPG2	Basement membrane-specific heparan sulfate proteoglycan core protein	PGBM_HUMAN	5.98e-29	108	108	108	108	108	108	108	108	108	108	108	108	108	108	108	108	108	108	108	108	108	108	108	108	108	108	108	108	108	108	108	108	108	108	108	108	108	108	108	108	108	108	108	108	108
P98164	LRP2	Low-density lipoprotein receptor-related protein 2	LRP2_HUMAN	5.98e-29	138	138	138	138	138	138	138	138	138	138	138	138	138	138	138	138	138	138	138	138	138	138	138	138	138	138	138	138	138	138	138	138	138	138	138	138	138	138	138	138	138	138	138	138	138
P98172	EFNB1	Ephrin-B1	EFNB1_HUMAN	2.48e-20	8	8	8	8	8	8	8	8	8	8	8	8	8	8	8	8	8	8	8	8	8	8	8	8	8	8	8	8	8	8	8	8	8	8	8	8	8	8	8	8	8	8	8	8	8
P99999	CYCS	Cytochrome c	CYC_HUMAN	1.5e-22	7	7	7	7	7	7	7	7	7	7	7	7	7	7	7	7	7	7	7	7	7	7	7	7	7	7	7	7	7	7	7	7	0	7	7	7	7	7	7	7	7	7	7	7	7
Q00013	MPP1	55 kDa erythrocyte membrane protein	EM55_HUMAN	2.95e-12	0	2	0	0	0	0	2	0	0	2	0	2	2	2	2	0	2	2	2	0	0	0	0	0	2	0	0	2	2	0	2	0	0	2	0	0	2	0	2	0	0	0	0	0	0
Q00169	PITPNA	Phosphatidylinositol transfer protein alpha isoform	PIPNA_HUMAN	1.71e-14	3	3	3	3	0	3	0	0	0	3	3	3	3	3	3	0	0	0	3	0	0	3	0	3	3	3	3	3	3	3	0	0	0	3	3	3	0	0	0	3	0	0	3	0	0
Q00325	SLC25A3	Phosphate carrier protein, mitochondrial	MPCP_HUMAN	2.54e-13	0	0	0	0	0	4	0	0	0	4	4	0	4	4	4	4	4	0	0	0	0	4	4	4	4	4	4	4	4	4	4	4	0	4	4	4	4	4	4	4	4	4	4	0	4
Q00341	HDLBP	Vigilin	VIGLN_HUMAN	1.98e-06	0	0	0	0	3	3	0	0	0	3	0	0	3	3	3	0	3	3	0	3	3	0	0	0	3	3	0	3	3	3	0	0	0	0	0	0	3	3	0	0	0	0	3	0	0
Q00610	CLTC	Clathrin heavy chain 1	CLH1_HUMAN	5.98e-29	39	39	39	39	39	39	0	0	0	39	39	39	39	39	39	39	39	39	39	39	0	39	39	39	39	39	39	39	39	39	39	39	0	39	39	39	39	39	39	39	39	39	39	39	39
Q00688	FKBP3	Peptidyl-prolyl cis-trans isomerase FKBP3	FKBP3_HUMAN	1.54e-05	0	2	0	0	0	0	0	0	0	0	0	0	2	2	2	0	0	0	2	0	0	0	0	0	0	0	0	0	0	0	0	0	0	0	0	0	0	0	0	0	0	0	0	0	0
Q00796	SORD	Sorbitol dehydrogenase	DHSO_HUMAN	5.38e-23	14	14	14	14	14	14	0	0	0	14	14	14	14	14	14	14	14	14	14	0	0	14	14	14	14	14	14	14	14	14	14	14	14	14	14	14	14	14	14	14	14	14	14	14	14
Q00839	HNRNPU	Heterogeneous nuclear ribonucleoprotein U	HNRPU_HUMAN	6.69e-08	0	3	0	3	3	0	3	3	0	3	3	3	3	3	3	3	3	0	3	0	0	0	0	0	3	3	3	3	3	3	3	3	0	3	0	3	3	3	3	0	0	0	3	0	0
Q01082	SPTBN1	Spectrin beta chain, non-erythrocytic 1	SPTB2_HUMAN	2.66e-14	0	10	10	10	0	0	0	0	10	10	10	10	10	10	10	0	0	10	10	0	0	10	10	0	10	10	10	10	10	10	10	10	0	10	10	10	10	10	10	10	0	10	10	10	0
Q01105	SET	Protein SET	SET_HUMAN	3.02e-15	4	4	4	4	4	4	0	0	0	4	4	4	4	4	4	4	4	4	4	0	0	4	0	0	4	4	4	4	4	4	4	0	0	4	4	4	4	4	0	0	0	0	4	0	0
Q01151	CD83	CD83 antigen	CD83_HUMAN	2.59e-15	3	3	3	3	3	3	3	3	3	3	3	3	3	3	3	3	3	3	3	3	3	3	3	3	3	3	3	3	3	3	3	3	3	3	3	3	3	3	3	3	3	0	3	3	0
Q01459	CTBS	Di-N-acetylchitobiase	DIAC_HUMAN	1.04e-20	15	15	15	15	15	15	15	15	15	15	15	15	15	15	15	15	15	15	15	15	15	15	15	15	15	15	15	15	15	15	15	15	15	15	15	15	15	15	15	15	15	15	15	15	15
Q01469	FABP5	Fatty acid-binding protein 5	FABP5_HUMAN	7.53e-27	19	19	19	19	19	19	19	19	19	19	19	19	19	19	19	19	19	19	19	19	19	19	19	19	19	19	19	19	19	19	19	19	19	19	19	19	19	19	19	19	19	19	19	19	19
Q01518	CAP1	Adenylyl cyclase-associated protein 1	CAP1_HUMAN	9.04e-27	14	14	14	14	14	14	14	14	0	14	14	14	14	14	14	14	14	14	14	14	14	14	14	14	14	14	14	14	14	14	14	14	0	14	14	14	14	14	14	14	14	14	14	14	14
Q01546	KRT76	Keratin, type II cytoskeletal 2 oral	K22O_HUMAN	1.22e-17	0	0	0	0	0	0	0	0	0	5	0	0	5	5	5	5	0	0	5	0	0	5	5	0	5	5	5	5	0	0	5	0	0	5	5	5	5	0	0	5	0	0	0	0	0
Q01813	PFKP	ATP-dependent 6-phosphofructokinase, platelet type	PFKAP_HUMAN	2.1e-22	7	7	7	7	0	7	0	0	7	7	7	7	7	7	7	7	7	7	7	0	0	7	7	0	7	7	7	7	7	7	0	0	0	7	7	7	7	7	7	7	7	7	7	7	7
Q01973	ROR1	Inactive tyrosine-protein kinase transmembrane receptor ROR1	ROR1_HUMAN	6.16e-27	9	9	9	9	9	9	9	9	9	9	9	9	9	9	9	9	9	9	9	9	9	9	9	9	9	9	9	9	9	9	9	9	9	9	9	9	9	9	9	9	9	9	9	9	9
Q01974	ROR2	Tyrosine-protein kinase transmembrane receptor ROR2	ROR2_HUMAN	2.26e-24	3	3	3	3	3	3	3	3	3	3	3	3	3	3	3	3	3	3	3	3	0	3	3	3	3	3	3	3	3	3	3	3	3	3	3	3	3	3	3	3	3	3	3	3	3
Q02083	NAAA	N-acylethanolamine-hydrolyzing acid amidase	NAAA_HUMAN	4.14e-23	5	5	5	5	5	5	5	0	0	5	5	5	5	5	5	5	5	5	5	0	0	5	5	5	5	5	5	5	5	5	5	0	0	5	5	5	5	5	5	5	5	0	5	5	0
Q02218;Q9ULD0	OGDH;OGDHL	2-oxoglutarate dehydrogenase, mitochondrial;2-oxoglutarate dehydrogenase-like, mitochondrial	ODO1_HUMAN;OGDHL_HUMAN	1.17e-05	4	4	0	4	0	0	4	0	0	4	0	4	4	4	4	0	0	0	0	0	0	0	0	0	0	0	0	4	4	4	0	0	0	0	4	4	4	4	4	0	4	0	4	0	4
Q02246	CNTN2	Contactin-2	CNTN2_HUMAN	9.03e-14	4	4	4	4	4	0	4	4	4	4	4	4	4	4	4	4	4	4	4	4	4	4	4	4	4	4	4	4	4	4	4	4	4	4	4	4	4	4	4	4	4	0	4	4	4
Q02252	ALDH6A1	Methylmalonate-semialdehyde dehydrogenase [acylating], mitochondrial	MMSA_HUMAN	5.33e-14	0	0	4	0	4	0	0	0	0	4	4	4	4	4	4	0	4	4	4	0	0	4	4	4	4	4	4	4	4	4	0	0	0	4	0	4	4	4	4	4	4	0	4	4	0
Q02383	SEMG2	Semenogelin-2	SEMG2_HUMAN	1.52e-26	54	54	54	54	54	54	54	54	54	54	54	54	54	54	54	54	54	54	54	54	54	54	54	54	54	54	54	54	54	54	54	54	54	54	54	54	54	54	54	54	54	54	54	54	54
Q02388	COL7A1	Collagen alpha-1(VII) chain	CO7A1_HUMAN	3.17e-17	9	9	9	9	9	9	9	9	9	9	9	9	9	9	9	9	9	9	9	0	9	9	9	9	9	9	9	9	9	9	9	9	0	9	9	9	9	9	9	9	9	9	9	9	9
Q02413	DSG1	Desmoglein-1	DSG1_HUMAN	1.52e-25	24	24	24	24	24	24	24	24	24	24	24	24	24	24	24	24	24	24	24	24	24	24	24	24	24	24	24	24	24	24	24	24	24	24	24	24	24	24	24	24	24	24	24	24	24
Q02487	DSC2	Desmocollin-2	DSC2_HUMAN	3e-20	25	25	25	25	25	25	25	25	25	25	25	25	25	25	25	25	25	25	25	25	25	25	25	25	25	25	25	25	25	25	25	25	25	25	25	25	25	25	25	25	25	25	25	25	25
Q02543	RPL18A	60S ribosomal protein L18a	RL18A_HUMAN	1.67e-13	0	0	0	0	0	0	0	0	0	0	2	0	2	2	2	0	0	0	0	0	0	0	0	0	0	0	0	0	0	2	2	0	0	0	0	0	0	0	0	0	0	0	0	0	0
Q02747	GUCA2A	Guanylin	GUC2A_HUMAN	1.97e-20	5	5	5	5	5	5	5	5	5	5	5	5	5	5	5	5	5	5	5	5	5	5	5	5	5	5	5	5	5	5	5	5	5	5	5	5	5	5	5	5	5	5	5	5	5
Q02790	FKBP4	Peptidyl-prolyl cis-trans isomerase FKBP4	FKBP4_HUMAN	1.78e-13	9	9	9	9	9	9	0	0	0	9	9	9	9	9	9	9	0	9	9	0	0	9	9	9	9	9	9	9	9	9	9	9	0	9	9	9	9	9	9	9	9	9	9	9	0
Q02817	MUC2	Mucin-2	MUC2_HUMAN	9.21e-09	3	3	3	3	3	3	0	0	3	3	3	3	3	3	3	3	0	3	3	0	0	3	0	3	3	3	3	3	3	3	3	3	0	3	3	3	3	3	0	3	0	3	3	3	0
Q02818	NUCB1	Nucleobindin-1	NUCB1_HUMAN	9.27e-24	30	30	30	30	30	30	30	30	30	30	30	30	30	30	30	30	30	30	30	30	30	30	30	30	30	30	30	30	30	30	30	30	30	30	30	30	30	30	30	30	30	30	30	30	30
Q02878	RPL6	60S ribosomal protein L6	RL6_HUMAN	2.16e-10	8	8	8	0	0	8	0	8	0	8	8	8	8	8	8	8	8	8	8	0	0	8	8	8	8	8	8	8	8	8	8	8	0	8	8	8	8	8	8	0	0	0	8	0	8
Q02978	SLC25A11	Mitochondrial 2-oxoglutarate/malate carrier protein	M2OM_HUMAN	5.75e-12	0	0	2	2	2	0	0	0	0	0	2	0	2	2	2	0	0	0	0	0	0	2	0	0	2	2	2	2	2	2	0	0	0	2	2	2	2	2	2	0	2	0	2	0	0
Q03154	ACY1	Aminoacylase-1	ACY1_HUMAN	4.11e-27	25	25	25	25	25	25	25	25	25	25	25	25	25	25	25	25	25	25	25	25	25	25	25	25	25	25	25	25	25	25	25	25	25	25	25	25	25	25	25	25	25	25	25	25	25
Q03167	TGFBR3	Transforming growth factor beta receptor type 3	TGBR3_HUMAN	3.03e-24	2	2	2	2	0	2	2	2	2	2	2	2	2	2	2	2	2	2	2	2	2	2	2	2	2	2	2	2	2	2	2	2	2	2	2	2	2	2	2	2	2	2	2	2	2
Q03169	TNFAIP2	Tumor necrosis factor alpha-induced protein 2	TNAP2_HUMAN	1.56e-08	0	0	0	0	0	0	0	0	0	0	0	0	2	2	2	0	0	0	0	0	0	0	0	0	0	2	0	2	2	0	0	0	0	0	0	0	0	0	0	0	0	0	0	0	0
Q03252	LMNB2	Lamin-B2	LMNB2_HUMAN	1.69e-13	0	0	5	0	5	5	0	0	0	5	5	5	5	5	5	5	5	0	5	0	0	5	0	0	5	5	5	5	5	5	0	0	0	5	0	5	0	0	5	0	0	5	0	0	0
Q03403	TFF2	Trefoil factor 2	TFF2_HUMAN	4.15e-18	8	8	8	8	8	8	8	8	8	8	8	8	8	8	8	8	8	8	8	8	8	8	8	8	8	8	8	8	8	8	8	8	8	8	8	8	8	8	8	8	8	8	8	8	8
Q03405	PLAUR	Urokinase plasminogen activator surface receptor	UPAR_HUMAN	9.67e-26	10	10	10	10	10	10	10	10	10	10	10	10	10	10	10	10	10	10	10	10	10	10	10	10	10	10	10	10	10	10	10	10	10	10	10	10	10	10	10	10	10	10	10	10	10
Q03426	MVK	Mevalonate kinase	KIME_HUMAN	1.16e-18	2	2	2	2	2	2	0	0	0	2	2	2	2	2	2	0	0	0	2	0	0	0	0	0	2	2	2	2	2	2	0	2	0	2	2	2	0	2	0	0	0	0	2	0	0
Q03591	CFHR1	Complement factor H-related protein 1	FHR1_HUMAN	3.69e-15	14	14	14	14	14	14	14	14	14	14	14	14	14	14	14	14	14	14	14	14	14	14	14	14	14	14	14	14	14	14	14	14	14	14	14	14	14	14	14	14	14	14	14	14	14
Q04637	EIF4G1	Eukaryotic translation initiation factor 4 gamma 1	IF4G1_HUMAN	4.52e-15	4	4	4	4	0	4	0	0	0	4	4	4	4	4	4	0	4	0	4	0	0	4	0	4	4	4	4	4	4	4	4	4	0	4	4	4	4	4	4	4	4	4	4	0	4
Q04695	KRT17	Keratin, type I cytoskeletal 17	K1C17_HUMAN	7.39e-19	8	8	8	8	8	8	8	8	8	8	8	8	8	8	8	8	8	8	8	8	8	8	8	8	8	8	8	8	8	8	8	8	8	8	8	8	8	8	8	8	8	0	8	8	8
Q04721	NOTCH2	Neurogenic locus notch homolog protein 2	NOTC2_HUMAN	5e-21	10	10	10	10	10	10	10	10	10	10	10	10	10	10	10	10	10	10	10	10	10	10	10	10	10	10	10	10	10	10	10	10	10	10	10	10	10	10	10	10	10	10	10	10	10
Q04756	HGFAC	Hepatocyte growth factor activator	HGFA_HUMAN	7.29e-26	13	13	13	13	13	13	13	13	13	13	13	13	13	13	13	13	13	13	13	13	13	13	13	13	13	13	13	13	13	13	13	13	0	13	13	13	13	13	13	13	13	13	13	13	13
Q04760	GLO1	Lactoylglutathione lyase	LGUL_HUMAN	8.8e-23	10	10	10	10	10	10	10	10	10	10	10	10	10	10	10	10	10	10	10	10	10	10	10	10	10	10	10	10	10	10	10	10	0	10	10	10	10	10	10	10	10	10	10	10	10
Q04771	ACVR1	Activin receptor type-1	ACVR1_HUMAN	1.25e-12	2	2	2	0	2	2	2	2	2	2	2	2	2	2	2	2	2	2	2	2	2	2	2	2	2	2	2	2	2	2	2	2	0	2	2	2	2	2	2	0	2	2	2	2	2
Q04917	YWHAH	14-3-3 protein eta	1433F_HUMAN	3.01e-23	6	6	6	6	6	6	6	0	0	6	6	6	6	6	6	6	6	6	6	0	0	6	6	6	6	6	6	6	6	6	6	6	0	6	6	6	6	6	6	6	0	6	6	6	6
Q05707	COL14A1	Collagen alpha-1(XIV) chain	COEA1_HUMAN	4.87e-28	18	18	18	18	18	18	18	18	18	18	18	18	18	18	18	18	18	18	18	18	18	18	18	18	18	18	18	18	18	18	18	18	18	18	18	18	18	18	18	18	18	18	18	18	18
Q06033	ITIH3	Inter-alpha-trypsin inhibitor heavy chain H3	ITIH3_HUMAN	1.89e-22	0	0	2	2	2	2	2	2	0	2	2	2	2	0	2	2	2	0	2	2	0	2	2	2	2	2	2	2	2	2	2	0	0	2	2	0	0	0	2	0	0	0	2	0	0
Q06278	AOX1	Aldehyde oxidase	AOXA_HUMAN	1.19e-20	12	12	12	12	12	12	0	12	0	12	12	12	12	12	12	12	12	12	12	12	0	12	12	12	12	12	12	12	12	12	12	12	12	12	12	12	12	12	12	12	12	12	12	12	12
Q06323	PSME1	Proteasome activator complex subunit 1	PSME1_HUMAN	2.06e-24	12	12	12	12	12	12	0	0	0	12	12	12	12	12	12	12	12	12	12	12	0	12	12	12	12	12	12	12	12	12	12	12	12	12	12	12	12	12	12	12	12	12	12	12	12
Q06418	TYRO3	Tyrosine-protein kinase receptor TYRO3	TYRO3_HUMAN	3.05e-22	3	3	3	3	3	3	3	3	3	3	3	3	3	3	3	3	3	3	3	3	3	3	3	3	3	3	3	3	3	3	3	3	3	3	3	3	3	3	3	3	3	3	3	3	3
Q06481	APLP2	Amyloid-like protein 2	APLP2_HUMAN	1.26e-18	13	13	13	13	13	13	13	13	13	13	13	13	13	13	13	13	13	13	13	13	13	13	13	13	13	13	13	13	13	13	13	13	13	13	13	13	13	13	13	13	13	13	13	13	13
Q06828	FMOD	Fibromodulin	FMOD_HUMAN	1.18e-20	5	5	5	5	5	0	5	5	5	5	5	5	5	5	5	5	5	5	5	5	5	5	5	5	5	5	5	5	5	5	5	5	5	5	5	5	5	5	5	5	5	5	5	5	5
Q06830	PRDX1	Peroxiredoxin-1	PRDX1_HUMAN	6.09e-23	18	18	18	18	18	18	18	18	18	18	18	18	18	18	18	18	18	18	18	18	18	18	18	18	18	18	18	18	18	18	18	18	18	18	18	18	18	18	18	18	18	18	18	18	18
Q07020	RPL18	60S ribosomal protein L18	RL18_HUMAN	3.12e-19	3	3	3	0	0	0	0	0	0	0	3	3	3	3	3	3	3	3	3	0	0	3	3	3	3	3	3	3	3	3	0	0	0	3	3	3	3	3	3	3	0	3	3	0	3
Q07021	C1QBP	Complement component 1 Q subcomponent-binding protein, mitochondrial	C1QBP_HUMAN	5.49e-20	4	4	4	4	4	0	4	0	0	4	0	0	4	4	4	0	0	0	4	0	0	4	4	4	4	4	4	4	4	4	4	4	4	4	4	4	4	4	0	4	4	4	4	4	0
Q07065	CKAP4	Cytoskeleton-associated protein 4	CKAP4_HUMAN	5.06e-15	8	8	8	8	8	8	0	0	0	8	8	8	8	8	8	0	0	8	8	0	0	8	8	0	8	8	8	8	8	8	8	0	0	8	8	8	8	0	8	0	0	0	8	0	0
Q07075	ENPEP	Glutamyl aminopeptidase	AMPE_HUMAN	5.98e-29	32	32	32	32	32	32	32	32	32	32	32	32	32	32	32	32	32	32	32	0	0	32	32	32	32	32	32	32	32	32	32	32	32	32	32	32	32	32	32	32	32	32	32	32	32
Q07157	TJP1	Tight junction protein ZO-1	ZO1_HUMAN	4.83e-13	8	8	8	8	8	8	0	0	0	8	8	8	8	8	8	0	0	8	8	0	0	8	8	0	8	8	8	8	8	8	8	8	0	8	8	8	8	8	8	0	0	0	8	0	0
Q07507	DPT	Dermatopontin	DERM_HUMAN	4.76e-24	8	8	8	8	8	8	8	8	8	8	8	8	8	8	8	8	8	8	8	8	8	8	8	8	8	8	8	8	8	8	8	8	8	8	8	8	8	8	8	8	8	8	8	8	8
Q075Z2	BSPH1	Binder of sperm protein homolog 1	BSPH1_HUMAN	4.82e-11	0	0	0	0	0	0	0	0	0	0	3	0	0	0	0	0	0	0	0	0	0	0	0	0	0	0	0	0	0	0	0	0	0	0	0	0	0	0	0	3	3	3	0	3	3
Q07654	TFF3	Trefoil factor 3	TFF3_HUMAN	2.49e-22	6	6	6	6	6	6	6	6	6	6	6	6	6	6	6	6	6	6	6	6	6	6	6	6	6	6	6	6	6	6	6	6	6	6	6	6	6	6	6	6	6	6	6	6	6
Q07699	SCN1B	Sodium channel subunit beta-1	SCN1B_HUMAN	1.72e-05	2	0	2	0	0	2	2	2	0	2	2	2	2	2	2	2	2	2	2	2	2	2	2	2	2	2	2	2	2	2	2	2	0	2	0	2	2	2	2	2	0	2	2	2	0
Q07812	BAX	Apoptosis regulator BAX	BAX_HUMAN	4.87e-20	2	0	2	2	2	2	0	0	0	2	2	2	2	2	2	0	2	0	2	0	0	0	0	0	2	2	2	2	2	2	0	0	0	2	2	2	2	2	0	0	0	0	2	0	2
Q07837	SLC3A1	Neutral and basic amino acid transport protein rBAT	SLC31_HUMAN	1.2e-19	7	7	7	0	0	0	0	0	0	7	7	7	7	7	7	7	7	7	7	0	0	7	7	7	7	7	7	7	7	7	7	7	0	7	7	7	7	7	7	7	0	0	7	0	7
Q07954	LRP1	Prolow-density lipoprotein receptor-related protein 1	LRP1_HUMAN	4.93e-21	23	23	23	23	23	23	23	23	23	23	23	23	23	23	23	23	23	23	23	23	23	23	23	23	23	23	23	23	23	23	23	23	23	23	23	23	23	23	23	23	23	23	23	23	23
Q07960	ARHGAP1	Rho GTPase-activating protein 1	RHG01_HUMAN	4.42e-22	5	5	5	5	5	0	0	0	0	5	5	5	5	5	5	5	5	5	5	0	0	0	0	5	5	5	5	5	5	5	5	5	0	5	5	5	5	5	5	5	0	0	5	5	0
Q08174	PCDH1	Protocadherin-1	PCDH1_HUMAN	3.42e-24	15	15	15	15	15	15	15	15	15	15	15	15	15	15	15	15	15	15	15	15	15	15	15	15	15	15	15	15	15	15	15	15	15	15	15	15	15	15	15	15	15	15	15	15	15
Q08188	TGM3	Protein-glutamine gamma-glutamyltransferase E	TGM3_HUMAN	2.04e-21	28	28	28	28	28	28	28	28	28	28	28	28	28	28	28	28	28	28	28	28	0	28	28	28	28	28	28	28	28	28	28	28	28	28	28	28	28	28	28	28	28	28	28	28	28
Q08211	DHX9	ATP-dependent RNA helicase A	DHX9_HUMAN	2.16e-06	0	0	0	0	0	0	0	0	0	0	0	2	2	2	2	0	0	0	0	0	0	0	0	0	0	0	0	2	2	0	0	0	0	0	0	0	2	0	0	0	0	0	0	0	0
Q08257	CRYZ	Quinone oxidoreductase	QOR_HUMAN	2.41e-21	13	13	13	13	13	13	13	0	13	13	13	13	13	13	13	13	13	13	13	0	0	13	13	13	13	13	13	13	13	13	13	13	13	13	13	13	13	13	13	13	13	13	13	13	13
Q08334	IL10RB	Interleukin-10 receptor subunit beta	I10R2_HUMAN	3.12e-16	5	5	5	5	5	5	5	5	5	5	5	5	5	5	5	5	5	5	5	5	5	5	5	5	5	5	5	5	5	5	5	5	0	5	5	5	5	5	5	5	5	5	5	5	5
Q08345	DDR1	Epithelial discoidin domain-containing receptor 1	DDR1_HUMAN	4.76e-25	16	16	16	16	16	16	16	16	16	16	16	16	16	16	16	16	16	16	16	16	16	16	16	16	16	16	16	16	16	16	16	16	16	16	16	16	16	16	16	16	16	16	16	16	16
Q08380	LGALS3BP	Galectin-3-binding protein	LG3BP_HUMAN	2.87e-24	22	22	22	22	22	22	22	22	22	22	22	22	22	22	22	22	22	22	22	22	22	22	22	22	22	22	22	22	22	22	22	22	22	22	22	22	22	22	22	22	22	22	22	22	22
Q08431	MFGE8	Lactadherin	MFGM_HUMAN	4.03e-24	0	0	5	0	0	0	0	5	5	5	5	5	5	5	5	5	5	5	5	5	5	5	5	5	5	5	5	5	5	5	5	5	0	5	5	5	5	5	5	5	5	5	5	5	5
Q08495	DMTN	Dematin	DEMA_HUMAN	2.64e-08	8	8	0	8	8	0	8	8	0	8	8	8	8	8	8	0	8	0	8	0	0	0	8	8	8	8	8	0	8	8	8	0	0	8	8	8	8	0	0	8	0	8	8	0	8
Q08554	DSC1	Desmocollin-1	DSC1_HUMAN	6.6e-21	10	10	10	10	10	10	10	10	10	10	10	10	10	10	10	10	10	10	10	10	10	10	10	10	10	10	10	10	10	10	10	10	10	10	10	10	10	10	10	10	10	10	10	10	10
Q08722	CD47	Leukocyte surface antigen CD47	CD47_HUMAN	5.29e-18	3	3	3	3	3	3	3	3	3	3	3	3	3	3	3	3	3	3	3	3	3	3	3	3	3	3	3	3	3	3	3	3	3	3	3	3	3	3	3	3	3	3	3	3	3
Q08830	FGL1	Fibrinogen-like protein 1	FGL1_HUMAN	2.93e-18	2	0	0	2	2	2	0	2	0	2	2	2	2	2	2	2	2	0	2	0	0	2	2	2	2	2	2	2	2	2	0	0	0	2	2	2	2	2	2	2	2	0	2	2	0
Q08945	SSRP1	FACT complex subunit SSRP1	SSRP1_HUMAN	4.48e-05	0	0	0	0	0	0	0	0	0	2	0	0	0	0	0	0	0	0	0	0	0	0	0	0	0	0	0	2	2	2	0	0	0	0	0	0	0	0	0	0	0	0	0	0	0
Q08AI8	MAB21L4	Protein mab-21-like 4	MB214_HUMAN	1.35e-27	0	15	15	15	15	15	0	0	0	15	15	15	15	15	15	0	0	0	15	0	0	0	0	0	15	15	15	15	15	15	0	0	0	15	15	0	15	0	0	15	0	15	15	15	15
Q09028;Q16576	RBBP4;RBBP7	Histone-binding protein RBBP4;Histone-binding protein RBBP7	RBBP4_HUMAN;RBBP7_HUMAN	2.82e-06	3	3	3	3	3	3	3	3	3	3	3	3	3	3	3	3	3	3	3	3	3	3	3	3	3	3	3	3	3	3	3	3	3	3	3	3	3	3	3	3	3	0	3	3	0
Q09328	MGAT5	Alpha-1,6-mannosylglycoprotein 6-beta-N-acetylglucosaminyltransferase A	MGT5A_HUMAN	1.86e-18	11	11	11	11	11	11	11	11	11	11	11	11	11	11	11	11	11	11	11	11	11	11	11	11	11	11	11	11	11	11	11	11	11	11	11	11	11	11	11	11	11	11	11	11	11
Q09666	AHNAK	Neuroblast differentiation-associated protein AHNAK	AHNK_HUMAN	2.3e-28	242	242	242	242	242	242	242	242	242	242	242	242	242	242	242	242	242	242	242	242	242	242	242	242	242	242	242	242	242	242	242	242	242	242	242	242	242	242	242	242	242	242	242	242	242
Q10471	GALNT2	Polypeptide N-acetylgalactosaminyltransferase 2	GALT2_HUMAN	3.13e-21	0	2	2	2	2	0	2	2	2	0	0	2	2	2	2	2	2	2	2	2	2	2	2	2	2	2	2	2	0	2	2	2	0	2	2	2	2	2	2	2	2	2	2	2	2
Q10567	AP1B1	AP-1 complex subunit beta-1	AP1B1_HUMAN	2.89e-17	13	13	13	13	13	13	0	0	0	13	13	13	13	13	13	13	13	0	13	0	0	13	0	13	13	13	13	13	13	13	0	0	0	13	13	13	13	13	13	13	13	0	13	0	0
Q10588	BST1	ADP-ribosyl cyclase/cyclic ADP-ribose hydrolase 2	BST1_HUMAN	6.62e-24	7	7	7	7	7	7	7	7	7	7	7	7	7	7	7	7	7	7	7	7	7	7	7	7	7	7	7	7	7	7	7	7	0	7	7	7	7	7	7	7	7	7	7	7	7
Q10589	BST2	Bone marrow stromal antigen 2	BST2_HUMAN	4.78e-18	2	2	2	2	2	2	2	2	2	2	2	2	2	2	2	2	2	2	2	2	2	2	2	2	2	2	2	2	2	2	2	2	0	2	2	2	2	2	2	2	2	2	2	2	2
Q12765	SCRN1	Secernin-1	SCRN1_HUMAN	3.05e-13	3	3	3	3	3	3	0	0	0	3	3	3	3	3	3	3	0	0	3	0	0	3	0	0	3	3	3	3	3	3	0	0	0	3	3	3	3	0	3	0	0	0	3	0	0
Q12792	TWF1	Twinfilin-1	TWF1_HUMAN	1.33e-20	6	6	6	6	0	6	0	0	0	6	6	6	6	6	6	6	6	0	6	0	0	6	6	6	6	6	6	6	6	6	6	6	0	6	6	6	6	6	6	0	0	0	6	6	0
Q12794	HYAL1	Hyaluronidase-1	HYAL1_HUMAN	5.98e-29	8	8	8	8	8	8	0	0	8	8	8	8	8	8	8	8	8	8	8	0	0	8	8	8	8	8	8	8	8	8	8	8	0	8	8	8	8	8	8	8	0	8	8	8	8
Q12805	EFEMP1	EGF-containing fibulin-like extracellular matrix protein 1	FBLN3_HUMAN	2.35e-23	23	23	23	23	23	23	23	23	23	23	23	23	23	23	23	23	23	23	23	23	23	23	23	23	23	23	23	23	23	23	23	23	23	23	23	23	23	23	23	23	23	23	23	23	23
Q12841	FSTL1	Follistatin-related protein 1	FSTL1_HUMAN	5.98e-29	14	14	14	14	14	14	14	14	14	14	14	14	14	14	14	14	14	14	14	14	14	14	14	14	14	14	14	14	14	14	14	14	14	14	14	14	14	14	14	14	14	14	14	14	14
Q12860	CNTN1	Contactin-1	CNTN1_HUMAN	5.98e-29	36	36	36	36	36	36	36	36	36	36	36	36	36	36	36	36	36	36	36	36	36	36	36	36	36	36	36	36	36	36	36	36	36	36	36	36	36	36	36	36	36	36	36	36	36
Q12864	CDH17	Cadherin-17	CAD17_HUMAN	2.26e-27	7	7	7	7	7	7	7	7	7	7	7	7	7	7	7	7	7	7	7	7	7	7	7	7	7	7	7	7	7	7	7	7	7	7	7	7	7	7	7	7	7	7	7	7	7
Q12866	MERTK	Tyrosine-protein kinase Mer	MERTK_HUMAN	8.61e-17	5	5	5	5	5	5	5	5	5	5	5	5	5	5	5	5	5	5	5	5	5	5	5	5	5	5	5	5	5	5	5	5	0	5	5	5	5	5	5	5	5	5	5	5	5
Q12905	ILF2	Interleukin enhancer-binding factor 2	ILF2_HUMAN	4.71e-10	0	0	0	0	0	0	0	0	0	2	2	2	2	2	2	0	2	0	2	0	0	0	0	0	2	2	2	2	2	2	2	2	0	2	2	2	2	0	0	0	0	0	2	0	0
Q12906	ILF3	Interleukin enhancer-binding factor 3	ILF3_HUMAN	1.8e-09	0	0	3	0	0	0	0	0	0	3	0	3	3	3	3	0	0	0	3	3	0	0	0	0	3	3	3	3	3	3	0	0	0	0	0	3	0	0	0	0	0	0	3	0	0
Q12907	LMAN2	Vesicular integral-membrane protein VIP36	LMAN2_HUMAN	1.07e-21	21	21	21	21	21	21	21	21	21	21	21	21	21	21	21	21	21	21	21	21	21	21	21	21	21	21	21	21	21	21	21	21	21	21	21	21	21	21	21	21	21	21	21	21	21
Q12913	PTPRJ	Receptor-type tyrosine-protein phosphatase eta	PTPRJ_HUMAN	6.4e-23	22	22	22	22	22	22	22	22	22	22	22	22	22	22	22	22	22	22	22	22	22	22	22	22	22	22	22	22	22	22	22	22	22	22	22	22	22	22	22	22	22	22	22	22	22
Q12929	EPS8	Epidermal growth factor receptor kinase substrate 8	EPS8_HUMAN	3.65e-27	19	19	19	19	19	19	19	19	19	19	19	19	19	19	19	19	19	19	19	0	0	19	19	19	19	19	19	19	19	19	19	19	19	19	19	19	19	19	19	19	19	19	19	19	19
Q12955	ANK3	Ankyrin-3	ANK3_HUMAN	5.77e-11	0	0	0	4	0	0	0	0	0	0	0	4	4	4	4	0	0	0	0	0	0	0	0	0	0	0	4	0	4	4	0	0	0	0	0	0	0	0	0	4	4	4	0	0	4
Q12965	MYO1E	Unconventional myosin-Ie	MYO1E_HUMAN	1.37e-10	0	3	0	0	0	3	0	0	0	3	0	3	3	3	3	0	0	0	3	0	0	3	3	3	3	3	3	3	3	3	0	0	0	0	0	3	0	0	0	0	0	0	3	0	0
Q13011	ECH1	Delta(3,5)-Delta(2,4)-dienoyl-CoA isomerase, mitochondrial	ECH1_HUMAN	5.14e-20	4	4	4	4	4	4	0	0	0	4	4	4	4	0	4	0	0	0	4	0	0	4	4	4	4	4	4	4	4	4	0	0	0	4	4	4	4	4	4	0	0	0	4	0	0
Q13045	FLII	Protein flightless-1 homolog	FLII_HUMAN	4.18e-14	0	0	0	0	0	0	0	0	0	0	4	0	4	4	4	0	0	0	4	0	0	0	0	0	4	4	4	4	4	4	0	0	0	4	4	0	4	0	0	0	0	0	4	0	0
Q13057	COASY	Bifunctional coenzyme A synthase	COASY_HUMAN	4.3e-19	3	0	3	3	3	3	0	3	0	3	3	3	3	3	3	3	3	3	3	0	0	3	3	3	3	3	3	3	3	3	3	3	0	3	3	3	3	3	3	3	0	3	3	3	3
Q13126	MTAP	S-methyl-5'-thioadenosine phosphorylase	MTAP_HUMAN	8.19e-21	9	9	9	9	9	9	9	0	0	9	9	9	9	9	9	9	0	9	9	0	0	9	9	9	9	9	9	9	9	9	0	9	0	9	9	9	9	9	9	9	0	0	9	0	0
Q13145	BAMBI	BMP and activin membrane-bound inhibitor homolog	BAMBI_HUMAN	6.16e-28	4	4	4	4	4	4	4	4	4	4	4	4	4	4	4	4	4	4	4	4	4	4	4	4	4	4	4	4	4	4	4	4	4	4	4	4	4	4	4	4	4	4	4	4	4
Q13162	PRDX4	Peroxiredoxin-4	PRDX4_HUMAN	1.93e-18	3	3	3	0	3	0	0	0	0	3	3	3	3	3	3	0	0	0	3	0	0	0	3	3	3	3	3	3	3	3	3	3	0	3	3	3	3	0	0	3	3	3	3	3	3
Q13183	SLC13A2	Solute carrier family 13 member 2	S13A2_HUMAN	5.55e-12	0	2	0	0	0	0	0	0	0	2	2	2	2	2	2	2	2	2	2	0	0	2	2	2	2	2	2	2	0	0	2	2	0	2	2	2	2	2	2	2	2	0	2	0	0
Q13200	PSMD2	26S proteasome non-ATPase regulatory subunit 2	PSMD2_HUMAN	1.83e-21	5	5	0	5	5	5	0	0	0	5	0	5	5	5	5	0	0	0	5	0	0	0	0	0	5	5	5	5	5	5	0	5	0	5	5	5	5	5	5	5	5	5	5	5	5
Q13201	MMRN1	Multimerin-1	MMRN1_HUMAN	5.91e-23	3	3	3	3	3	3	3	3	3	3	3	3	3	3	3	3	3	3	3	3	3	3	3	3	3	3	3	3	3	3	3	3	3	3	3	3	3	3	3	3	3	3	3	3	3
Q13228	SELENBP1	Methanethiol oxidase	SBP1_HUMAN	5.98e-29	25	25	25	25	25	25	25	25	25	25	25	25	25	25	25	25	25	25	25	25	25	25	25	25	25	25	25	25	25	25	25	25	25	25	25	25	25	25	25	25	25	25	25	25	25
Q13241	KLRD1	Natural killer cells antigen CD94	KLRD1_HUMAN	5.65e-21	2	2	2	2	0	2	2	0	2	2	2	2	2	2	2	2	2	2	2	2	2	2	2	2	2	2	2	2	2	2	0	0	0	2	0	0	2	0	2	0	0	0	2	0	0
Q13268	DHRS2	Dehydrogenase/reductase SDR family member 2, mitochondrial	DHRS2_HUMAN	1.95e-18	5	5	5	5	5	5	0	5	0	5	5	5	5	5	5	5	5	5	5	0	0	5	5	5	5	5	5	5	5	5	5	5	0	5	5	5	5	5	5	0	0	0	5	5	0
Q13277	STX3	Syntaxin-3	STX3_HUMAN	1.92e-23	4	4	4	4	4	4	0	0	0	4	4	4	4	4	4	4	4	4	4	0	0	4	4	4	4	4	4	4	4	4	4	4	0	4	4	4	4	4	4	4	4	4	4	4	4
Q13291	SLAMF1	Signaling lymphocytic activation molecule	SLAF1_HUMAN	7.24e-25	2	2	2	2	2	2	0	2	0	2	2	2	2	2	2	2	2	2	2	2	0	2	2	2	2	2	2	2	2	2	2	2	0	2	2	2	2	2	2	2	2	2	2	2	2
Q13308	PTK7	Inactive tyrosine-protein kinase 7	PTK7_HUMAN	1.55e-20	11	11	11	11	11	11	11	11	11	11	11	11	11	11	11	11	11	11	11	11	11	11	11	11	11	11	11	11	11	11	11	11	11	11	11	11	11	11	11	11	11	11	11	11	11
Q13332	PTPRS	Receptor-type tyrosine-protein phosphatase S	PTPRS_HUMAN	2.34e-26	25	25	25	25	25	25	25	25	25	25	25	25	25	25	25	25	25	25	25	25	25	25	25	25	25	25	25	25	25	25	25	25	25	25	25	25	25	25	25	25	25	25	25	25	25
Q13347	EIF3I	Eukaryotic translation initiation factor 3 subunit I	EIF3I_HUMAN	1.89e-07	0	0	0	0	0	0	0	0	0	0	0	0	2	2	2	0	0	0	2	0	0	2	0	0	0	0	0	2	2	2	0	0	0	2	2	0	2	0	0	0	0	0	2	0	0
Q13361	MFAP5	Microfibrillar-associated protein 5	MFAP5_HUMAN	8.46e-16	3	3	3	3	3	3	3	3	3	3	3	3	3	3	3	3	3	3	3	3	3	3	3	3	3	3	3	3	3	3	3	3	3	3	3	3	3	3	3	3	3	3	3	3	3
Q13404	UBE2V1	Ubiquitin-conjugating enzyme E2 variant 1	UB2V1_HUMAN	1.56e-14	6	6	6	6	6	6	6	0	6	6	6	6	6	6	6	6	6	6	6	6	6	6	6	6	6	6	6	6	6	6	6	6	0	6	6	6	6	6	6	6	6	6	6	6	6
Q13405	MRPL49	39S ribosomal protein L49, mitochondrial	RM49_HUMAN	7.29e-08	0	0	0	0	0	0	0	0	0	0	0	0	2	2	0	0	0	0	2	0	0	0	0	0	0	0	0	2	2	2	0	0	0	0	0	0	0	0	0	0	0	0	0	0	0
Q13409	DYNC1I2	Cytoplasmic dynein 1 intermediate chain 2	DC1I2_HUMAN	7.13e-12	0	0	2	0	0	0	0	0	0	2	2	2	2	2	2	2	0	2	2	0	0	2	2	0	2	2	2	2	2	2	0	2	0	2	2	2	2	0	2	2	0	0	2	2	2
Q13421	MSLN	Mesothelin	MSLN_HUMAN	2.08e-26	10	10	10	10	10	10	10	10	10	10	10	10	10	10	10	10	10	10	10	10	10	10	10	10	10	10	10	10	10	10	10	10	10	10	10	10	10	10	10	10	10	10	10	10	10
Q13442	PDAP1	28 kDa heat- and acid-stable phosphoprotein	HAP28_HUMAN	1.66e-14	0	0	0	0	0	2	0	0	0	0	0	2	2	0	2	0	2	2	2	2	0	2	2	2	2	2	2	0	2	2	2	2	0	2	2	2	2	2	2	2	0	2	2	0	2
Q13443	ADAM9	Disintegrin and metalloproteinase domain-containing protein 9	ADAM9_HUMAN	8.23e-19	9	9	9	9	9	9	9	9	9	9	9	9	9	9	9	9	9	9	9	9	9	9	9	9	9	9	9	9	9	9	9	9	9	9	9	9	9	9	9	9	9	9	9	9	9
Q13449	LSAMP	Limbic system-associated membrane protein	LSAMP_HUMAN	9.44e-22	8	8	8	8	8	8	8	8	8	8	8	8	8	8	8	8	8	8	8	8	8	8	8	8	8	8	8	8	8	8	8	8	8	8	8	8	8	8	8	8	8	8	8	8	8
Q13477	MADCAM1	Mucosal addressin cell adhesion molecule 1	MADCA_HUMAN	5.5e-27	7	7	7	7	7	7	7	7	7	7	7	7	7	7	7	7	7	7	7	7	7	7	7	7	7	7	7	7	7	7	7	7	7	7	7	7	7	7	7	7	7	7	7	7	7
Q13510	ASAH1	Acid ceramidase	ASAH1_HUMAN	2.27e-22	19	19	19	19	19	19	19	19	19	19	19	19	19	19	19	19	19	19	19	19	19	19	19	19	19	19	19	19	19	19	19	19	19	19	19	19	19	19	19	19	19	19	19	19	19
Q13557	CAMK2D	Calcium/calmodulin-dependent protein kinase type II subunit delta	KCC2D_HUMAN	8.84e-11	2	0	2	2	2	2	0	0	0	2	2	2	2	2	2	0	0	0	2	0	0	2	2	0	2	2	2	2	2	2	2	2	0	2	2	2	2	2	2	0	0	0	2	0	0
Q13561	DCTN2	Dynactin subunit 2	DCTN2_HUMAN	2.71e-11	6	6	6	6	6	6	6	6	6	6	6	6	6	6	6	6	6	6	6	6	6	6	6	6	6	6	6	6	6	6	6	6	6	6	6	6	6	6	6	6	6	6	6	6	6
Q13591	SEMA5A	Semaphorin-5A	SEM5A_HUMAN	1.95e-19	6	6	6	6	6	6	6	0	0	6	6	6	6	6	6	6	6	6	6	6	6	6	6	6	6	6	6	6	6	6	6	6	0	6	6	6	6	6	6	6	6	6	6	6	6
Q13596	SNX1	Sorting nexin-1	SNX1_HUMAN	1.3e-16	2	2	2	2	2	2	2	2	2	2	2	2	2	2	2	2	2	2	2	2	2	2	2	2	2	2	2	2	0	2	2	2	2	2	0	2	0	0	2	0	0	2	2	0	0
Q13618	CUL3	Cullin-3	CUL3_HUMAN	2.04e-09	0	0	0	0	0	0	0	0	0	0	2	0	2	2	2	0	0	0	2	0	0	0	0	0	2	2	2	2	2	2	0	0	0	2	2	0	2	2	0	2	2	2	2	2	2
Q13621	SLC12A1	Solute carrier family 12 member 1	S12A1_HUMAN	1.07e-26	20	20	20	20	20	20	20	20	20	20	20	20	20	20	20	20	20	20	20	20	20	20	20	20	20	20	20	20	20	20	20	20	20	20	20	20	20	20	20	20	20	20	20	20	20
Q13630	TSTA3	GDP-L-fucose synthase	FCL_HUMAN	5.7e-09	3	3	3	3	3	3	0	0	0	3	0	3	3	3	3	0	0	3	3	0	0	0	0	0	3	0	0	3	3	3	0	0	0	3	3	3	3	3	0	0	0	0	3	0	0
Q13740	ALCAM	CD166 antigen	CD166_HUMAN	5.98e-29	9	9	9	9	9	9	9	9	9	9	9	9	9	9	9	9	9	9	9	9	9	9	9	9	9	9	9	9	9	9	9	9	0	9	9	9	9	9	9	9	9	9	9	9	9
Q13753	LAMC2	Laminin subunit gamma-2	LAMC2_HUMAN	5.29e-21	2	2	2	0	2	2	2	2	2	2	2	2	2	0	2	2	2	2	2	2	2	2	2	2	2	2	2	2	2	2	2	2	0	2	2	2	2	2	2	2	2	2	2	2	2
Q13790	APOF	Apolipoprotein F	APOF_HUMAN	2.42e-13	2	2	2	2	0	2	2	2	2	2	2	2	2	2	2	2	2	2	2	2	2	2	2	2	2	2	2	2	2	0	2	2	2	2	2	2	2	2	2	2	2	2	2	2	2
Q13813	SPTAN1	Spectrin alpha chain, non-erythrocytic 1	SPTN1_HUMAN	9.01e-29	52	52	52	52	52	52	0	0	0	52	52	52	52	52	52	52	52	52	52	0	0	52	52	52	52	52	52	52	52	52	52	52	0	52	52	52	52	52	52	52	52	52	52	0	52
Q13822	ENPP2	Ectonucleotide pyrophosphatase/phosphodiesterase family member 2	ENPP2_HUMAN	1.21e-21	16	16	16	16	16	16	16	16	16	16	16	16	16	16	16	16	16	16	16	16	16	16	16	16	16	16	16	16	16	16	16	16	16	16	16	16	16	16	16	16	16	16	16	16	16
Q13835	PKP1	Plakophilin-1	PKP1_HUMAN	2.06e-22	28	28	28	28	28	28	28	28	28	28	28	28	28	28	28	28	28	28	28	28	28	28	28	28	28	28	28	28	28	28	28	28	28	28	28	28	28	28	28	28	28	28	28	28	28
Q13838	DDX39B	Spliceosome RNA helicase DDX39B	DX39B_HUMAN	3.58e-12	5	5	5	5	5	5	0	0	0	5	5	5	5	5	5	5	0	5	5	0	0	5	5	5	5	5	5	5	5	5	5	0	0	5	5	5	5	5	5	0	0	0	5	0	0
Q13867	BLMH	Bleomycin hydrolase	BLMH_HUMAN	4.44e-18	11	11	11	11	11	11	11	0	11	11	11	11	11	11	11	11	11	11	11	0	0	11	11	11	11	11	11	11	11	11	11	11	0	11	11	11	11	11	11	11	11	11	11	0	11
Q13873	BMPR2	Bone morphogenetic protein receptor type-2	BMPR2_HUMAN	3.4e-13	5	5	5	5	5	5	5	5	5	5	5	5	5	5	5	5	5	5	5	5	5	5	5	5	5	5	5	5	5	5	5	5	5	5	5	5	5	5	5	5	5	5	5	5	5
Q13938	CAPS	Calcyphosin	CAYP1_HUMAN	6.5e-13	7	7	7	7	7	7	7	7	7	7	7	7	7	7	7	7	7	7	7	7	7	7	7	7	7	7	7	7	7	7	7	7	0	7	7	7	7	7	7	7	7	7	7	7	7
Q14002	CEACAM7	Carcinoembryonic antigen-related cell adhesion molecule 7	CEAM7_HUMAN	6.98e-13	5	5	5	5	5	5	5	5	5	5	5	5	5	5	5	5	5	5	5	0	0	5	5	5	5	5	5	5	5	5	5	5	5	5	5	5	5	5	5	5	5	5	5	5	5
Q14019	COTL1	Coactosin-like protein	COTL1_HUMAN	1.48e-15	13	13	13	13	13	13	13	13	13	13	13	13	13	13	13	13	13	13	13	13	13	13	13	13	13	13	13	13	13	13	13	13	13	13	13	13	13	13	13	13	13	13	13	13	13
Q14031	COL4A6	Collagen alpha-6(IV) chain	CO4A6_HUMAN	1.6e-11	2	2	2	2	2	2	0	0	0	2	2	2	2	2	2	2	2	2	2	0	0	0	0	2	2	2	2	2	2	2	0	0	0	2	2	2	2	2	2	0	0	2	2	0	0
Q14103	HNRNPD	Heterogeneous nuclear ribonucleoprotein D0	HNRPD_HUMAN	3.97e-19	0	0	3	3	3	3	3	0	0	3	3	3	3	3	3	3	3	0	3	0	3	3	3	3	3	3	3	3	3	3	0	3	0	3	0	3	3	0	3	3	0	0	3	0	0
Q14108	SCARB2	Lysosome membrane protein 2	SCRB2_HUMAN	1.24e-19	7	7	7	7	7	7	7	7	7	7	7	7	7	7	7	7	7	7	7	7	7	7	7	7	7	7	7	7	7	7	7	7	7	7	7	7	7	7	7	7	7	7	7	7	7
Q14112	NID2	Nidogen-2	NID2_HUMAN	8.51e-10	3	3	3	0	0	3	3	3	3	3	3	3	3	3	3	3	3	3	3	3	3	3	3	3	3	3	3	3	3	3	3	3	3	3	3	3	3	3	3	3	3	3	3	3	3
Q14116	IL18	Interleukin-18	IL18_HUMAN	4.47e-19	3	3	3	3	3	3	3	3	3	3	3	3	3	3	3	3	3	3	3	3	0	3	3	3	3	3	3	3	3	3	0	0	0	3	3	3	3	3	3	0	0	0	3	3	3
Q14117	DPYS	Dihydropyrimidinase	DPYS_HUMAN	7.62e-23	7	7	7	7	7	7	0	0	0	7	7	7	7	7	7	7	7	7	7	0	0	7	7	7	7	7	7	7	7	7	7	7	0	7	7	7	7	7	7	7	0	0	7	0	0
Q14118	DAG1	Dystroglycan	DAG1_HUMAN	1.36e-26	17	17	17	17	17	17	17	17	17	17	17	17	17	17	17	17	17	17	17	17	17	17	17	17	17	17	17	17	17	17	17	17	17	17	17	17	17	17	17	17	17	17	17	17	17
Q14126	DSG2	Desmoglein-2	DSG2_HUMAN	6.85e-19	13	13	13	13	13	13	13	13	13	13	13	13	13	13	13	13	13	13	13	13	13	13	13	13	13	13	13	13	13	13	13	13	13	13	13	13	13	13	13	13	13	13	13	13	13
Q14134	TRIM29	Tripartite motif-containing protein 29	TRI29_HUMAN	3.12e-16	15	15	15	15	15	15	0	15	0	15	15	15	15	15	15	15	15	0	15	15	15	15	15	0	15	15	15	15	15	15	15	15	15	15	15	15	15	15	15	0	0	0	15	0	0
Q14152	EIF3A	Eukaryotic translation initiation factor 3 subunit A	EIF3A_HUMAN	5.38e-14	0	0	12	0	0	0	0	0	0	12	12	12	12	12	12	12	0	0	12	0	0	0	0	0	12	12	12	12	12	12	0	12	0	12	12	12	12	12	0	12	12	0	12	0	12
Q14162	SCARF1	Scavenger receptor class F member 1	SREC_HUMAN	1.04e-22	2	0	0	2	0	2	2	2	2	2	2	2	0	2	0	2	2	2	2	2	2	2	2	2	2	2	2	2	2	2	2	2	0	2	2	2	2	2	2	2	2	0	2	2	2
Q14165	MLEC	Malectin	MLEC_HUMAN	6.09e-11	5	5	5	5	5	5	5	0	5	5	5	5	5	5	5	5	5	5	5	5	0	5	5	5	5	5	5	5	5	5	5	5	0	5	5	5	5	5	5	5	5	5	5	5	5
Q14166	TTLL12	Tubulin--tyrosine ligase-like protein 12	TTL12_HUMAN	3.99e-13	0	7	0	7	0	0	0	0	0	7	7	7	7	7	7	0	0	7	7	0	0	0	0	0	7	7	7	7	7	7	0	0	0	7	7	0	7	7	7	0	0	0	7	0	0
Q14194	CRMP1	Dihydropyrimidinase-related protein 1	DPYL1_HUMAN	1.77e-09	3	0	3	3	0	3	3	3	3	3	3	3	3	3	3	3	3	3	3	3	3	3	3	3	3	3	3	3	3	3	3	3	3	3	3	3	3	3	3	3	3	3	3	3	0
Q14204	DYNC1H1	Cytoplasmic dynein 1 heavy chain 1	DYHC1_HUMAN	1.04e-20	34	34	34	34	0	34	34	0	0	34	34	34	34	34	34	34	34	0	34	0	0	34	34	34	34	34	34	34	34	34	34	34	34	34	34	34	34	34	34	34	0	0	34	34	0
Q14210	LY6D	Lymphocyte antigen 6D	LY6D_HUMAN	2.07e-19	4	4	4	4	4	4	4	4	4	4	4	4	4	4	4	4	4	4	4	4	4	4	4	4	4	4	4	4	4	4	4	4	4	4	4	4	4	4	4	4	4	4	4	4	4
Q14247	CTTN	Src substrate cortactin	SRC8_HUMAN	4.57e-10	10	10	10	10	10	10	10	10	10	10	10	10	10	10	10	10	10	10	10	10	10	10	10	10	10	10	10	10	10	10	10	10	10	10	10	10	10	10	10	10	10	10	10	10	10
Q14254	FLOT2	Flotillin-2	FLOT2_HUMAN	6.9e-18	3	3	3	0	0	0	0	0	0	3	3	3	3	3	3	3	3	3	3	0	0	0	3	0	3	3	3	3	3	3	0	3	0	3	3	3	3	3	3	0	3	3	3	3	3
Q14314	FGL2	Fibroleukin	FGL2_HUMAN	5.43e-14	12	12	12	12	12	12	12	12	0	12	12	12	12	12	12	12	12	12	12	0	12	12	12	12	12	12	12	12	12	12	12	12	0	12	12	12	12	12	12	12	0	12	12	12	12
Q14315	FLNC	Filamin-C	FLNC_HUMAN	1.79e-21	27	27	27	27	27	27	27	27	27	27	27	27	27	27	27	27	27	27	27	27	27	27	27	27	27	27	27	27	27	27	27	27	27	27	27	27	27	27	27	27	27	27	27	27	27
Q14344	GNA13	Guanine nucleotide-binding protein subunit alpha-13	GNA13_HUMAN	2.2e-17	4	4	4	4	4	4	0	0	0	4	4	4	4	4	4	4	4	4	4	0	0	4	0	0	4	4	4	4	4	4	4	4	0	4	4	4	4	4	4	4	4	4	4	4	4
Q14376	GALE	UDP-glucose 4-epimerase	GALE_HUMAN	2.02e-21	4	4	4	4	4	4	0	4	4	4	4	4	4	4	4	0	4	0	4	0	0	4	4	4	4	4	4	4	4	4	4	4	0	4	4	4	4	4	4	4	0	0	4	4	0
Q14393	GAS6	Growth arrest-specific protein 6	GAS6_HUMAN	7.02e-24	17	17	17	17	17	17	17	17	0	17	17	17	17	17	17	17	17	17	17	17	0	17	17	17	17	17	17	17	17	17	17	17	17	17	17	17	17	17	17	17	17	17	17	17	17
Q14508	WFDC2	WAP four-disulfide core domain protein 2	WFDC2_HUMAN	7.34e-22	8	8	8	8	8	8	8	8	8	8	8	8	8	8	8	8	8	8	8	8	8	8	8	8	8	8	8	8	8	8	8	8	8	8	8	8	8	8	8	8	8	8	8	8	8
Q14515	SPARCL1	SPARC-like protein 1	SPRL1_HUMAN	1.53e-23	29	29	29	29	29	29	29	29	29	29	29	29	29	29	29	29	29	29	29	29	29	29	29	29	29	29	29	29	29	29	29	29	29	29	29	29	29	29	29	29	29	29	29	29	29
Q14574	DSC3	Desmocollin-3	DSC3_HUMAN	1.98e-27	12	12	12	12	12	12	12	12	12	12	12	12	12	12	12	12	12	12	12	12	12	12	12	12	12	12	12	12	12	12	12	12	0	12	12	12	12	12	12	12	12	12	12	12	12
Q14624	ITIH4	Inter-alpha-trypsin inhibitor heavy chain H4	ITIH4_HUMAN	5.98e-29	42	42	42	42	42	42	42	42	42	42	42	42	42	42	42	42	42	42	42	42	42	42	42	42	42	42	42	42	42	42	42	42	42	42	42	42	42	42	42	42	42	42	42	42	42
Q14651	PLS1	Plastin-1	PLSI_HUMAN	3.88e-21	3	0	3	3	3	3	0	0	0	3	3	3	3	0	3	3	3	3	3	0	0	3	3	0	3	3	3	3	3	3	0	0	0	3	3	3	3	3	3	3	0	0	3	0	0
Q14677	CLINT1	Clathrin interactor 1	EPN4_HUMAN	1.44e-07	0	0	0	0	4	0	0	0	0	0	0	0	4	4	4	0	0	0	4	0	0	0	0	0	4	4	4	4	4	4	0	0	0	0	0	4	0	0	0	0	0	0	4	0	0
Q14697	GANAB	Neutral alpha-glucosidase AB	GANAB_HUMAN	6.23e-24	12	12	12	12	12	12	12	0	12	12	12	12	12	12	12	12	12	12	12	12	12	12	12	12	12	12	12	12	12	12	12	12	0	12	12	12	12	12	12	12	12	12	12	12	12
Q14703	MBTPS1	Membrane-bound transcription factor site-1 protease	MBTP1_HUMAN	7.17e-06	5	5	5	5	5	5	0	0	0	5	5	5	5	5	5	5	5	5	5	0	0	0	0	0	5	5	5	5	0	5	0	0	0	5	5	5	5	5	5	0	0	0	5	0	0
Q14764	MVP	Major vault protein	MVP_HUMAN	1.84e-18	22	22	22	22	22	22	22	0	0	22	22	22	22	22	22	22	22	22	22	0	22	22	22	22	22	22	22	22	22	22	22	22	0	22	22	22	22	22	22	22	22	0	22	0	0
Q14766	LTBP1	Latent-transforming growth factor beta-binding protein 1	LTBP1_HUMAN	1.13e-25	16	16	16	16	16	16	16	16	16	16	16	16	16	16	16	16	16	16	16	16	16	16	16	16	16	16	16	16	16	16	16	16	16	16	16	16	16	16	16	16	16	16	16	16	16
Q14767	LTBP2	Latent-transforming growth factor beta-binding protein 2	LTBP2_HUMAN	4.28e-21	34	34	34	34	34	34	34	34	34	34	34	34	34	34	34	34	34	34	34	34	34	34	34	34	34	34	34	34	34	34	34	34	34	34	34	34	34	34	34	34	34	34	34	34	34
Q14847	LASP1	LIM and SH3 domain protein 1	LASP1_HUMAN	5.63e-15	9	9	9	9	9	9	9	9	9	9	9	9	9	9	9	9	9	9	9	9	9	9	9	9	9	9	9	9	9	9	9	9	9	9	9	9	9	9	9	9	9	9	9	9	9
Q14894	CRYM	Ketimine reductase mu-crystallin	CRYM_HUMAN	1.39e-18	8	8	8	8	8	8	0	0	0	8	8	8	8	8	8	8	8	8	8	0	0	8	8	8	8	8	8	8	8	8	8	8	8	8	8	8	8	8	8	8	8	8	8	8	8
Q14914	PTGR1	Prostaglandin reductase 1	PTGR1_HUMAN	4.33e-21	15	15	15	15	15	15	15	15	15	15	15	15	15	15	15	15	15	15	15	15	0	15	15	15	15	15	15	15	15	15	15	15	15	15	15	15	15	15	15	15	15	15	15	15	15
Q14974	KPNB1	Importin subunit beta-1	IMB1_HUMAN	8.83e-23	9	9	9	9	9	9	0	0	0	9	9	9	9	9	9	0	0	0	9	0	0	0	9	0	9	9	9	9	9	9	0	0	0	9	9	9	9	9	9	9	0	9	9	0	0
Q14982	OPCML	Opioid-binding protein/cell adhesion molecule	OPCM_HUMAN	2.44e-18	12	12	12	12	12	12	12	12	12	12	12	12	12	12	12	12	12	12	12	12	12	12	12	12	12	12	12	12	12	12	12	12	12	12	12	12	12	12	12	12	12	12	12	12	12
Q14990	ODF1	Outer dense fiber protein 1	ODFP1_HUMAN	4.61e-21	0	3	0	0	0	0	0	0	0	3	0	0	3	0	3	0	0	0	0	0	0	0	0	0	0	3	0	3	3	0	0	0	0	0	0	0	3	0	0	3	3	3	0	3	3
Q14CN2	CLCA4	Calcium-activated chloride channel regulator 4	CLCA4_HUMAN	1.59e-27	27	27	27	27	27	27	27	27	27	27	27	27	27	27	27	27	27	27	27	27	27	27	27	27	27	27	27	27	27	27	27	27	0	27	27	27	27	27	27	27	27	27	27	27	27
Q14CN4	KRT72	Keratin, type II cytoskeletal 72	K2C72_HUMAN	4.91e-14	2	2	2	0	2	2	0	2	0	0	2	2	2	2	2	2	2	2	0	0	0	0	2	2	2	2	2	2	2	2	2	0	2	2	2	2	0	2	2	0	0	0	2	0	0
Q15008	PSMD6	26S proteasome non-ATPase regulatory subunit 6	PSMD6_HUMAN	7.01e-23	3	3	3	3	3	3	0	0	0	3	3	3	3	3	3	0	3	3	3	0	0	3	3	3	3	3	3	3	3	3	0	3	0	3	3	3	3	3	3	3	3	3	3	3	3
Q15019	45171	Septin-2	SEPT2_HUMAN	2.27e-08	2	2	2	0	2	0	0	0	0	2	2	2	2	2	2	0	2	2	2	0	0	0	0	0	2	2	2	2	2	2	2	2	0	2	2	2	2	2	2	2	2	0	2	2	0
Q15043	SLC39A14	Zinc transporter ZIP14	S39AE_HUMAN	1.13e-25	3	3	3	3	3	3	3	3	3	3	3	3	3	3	3	3	3	3	3	3	3	3	3	3	3	3	3	3	3	3	3	3	3	3	3	3	3	3	3	3	3	3	3	3	3
Q15056	EIF4H	Eukaryotic translation initiation factor 4H	IF4H_HUMAN	7.07e-12	2	2	2	0	0	2	0	0	0	2	0	0	2	2	2	0	2	0	2	0	2	0	2	0	2	2	0	2	2	2	0	0	0	2	2	2	2	0	2	0	0	0	2	0	0
Q15067	ACOX1	Peroxisomal acyl-coenzyme A oxidase 1	ACOX1_HUMAN	9.18e-11	0	0	0	0	0	0	0	0	0	3	0	3	3	3	3	3	0	0	3	0	0	0	0	0	3	3	3	3	3	3	0	0	0	0	0	0	0	3	0	0	0	0	3	0	0
Q15075	EEA1	Early endosome antigen 1	EEA1_HUMAN	5.81e-13	6	6	0	0	6	0	0	0	0	6	6	0	6	6	6	6	0	0	6	0	0	0	0	0	6	6	6	6	6	0	0	6	0	6	6	6	6	0	0	0	0	0	6	0	0
Q15084	PDIA6	Protein disulfide-isomerase A6	PDIA6_HUMAN	1.3e-19	11	11	11	11	11	11	0	0	0	11	11	11	11	11	11	11	11	11	11	0	0	11	11	11	11	11	11	11	11	11	11	11	0	11	11	11	11	11	11	11	11	11	11	11	11
Q15109	AGER	Advanced glycosylation end product-specific receptor	RAGE_HUMAN	2.09e-17	2	2	2	2	2	0	2	2	2	2	2	2	2	2	2	0	0	0	2	2	2	2	2	2	2	2	2	2	2	2	2	2	0	2	2	2	2	2	2	2	2	2	2	2	2
Q15113	PCOLCE	Procollagen C-endopeptidase enhancer 1	PCOC1_HUMAN	4.41e-27	12	12	12	12	12	12	12	12	12	12	12	12	12	12	12	12	12	12	12	12	12	12	12	12	12	12	12	12	12	12	12	12	12	12	12	12	12	12	12	12	12	12	12	12	12
Q15116	PDCD1	Programmed cell death protein 1	PDCD1_HUMAN	5.45e-12	3	3	3	3	0	3	3	3	3	3	3	3	3	3	3	3	3	3	3	3	3	3	3	3	3	3	3	3	3	3	3	3	3	3	3	3	3	3	3	3	3	3	3	3	3
Q15121	PEA15	Astrocytic phosphoprotein PEA-15	PEA15_HUMAN	8.29e-21	2	2	2	2	2	2	0	0	0	2	2	2	2	2	2	0	2	0	2	0	0	2	2	2	2	2	2	2	2	2	0	0	0	2	2	2	2	2	2	0	0	0	2	0	0
Q15126	PMVK	Phosphomevalonate kinase	PMVK_HUMAN	5.07e-07	0	0	0	0	2	0	0	0	0	2	0	2	2	2	2	0	0	0	2	0	0	0	0	0	2	0	0	2	2	2	0	0	0	2	2	0	2	0	0	0	0	0	2	0	0
Q15149	PLEC	Plectin	PLEC_HUMAN	1.16e-25	71	71	71	71	71	71	71	71	71	71	71	71	71	71	71	71	71	71	71	71	71	71	71	71	71	71	71	71	71	71	71	71	0	71	71	71	71	71	71	71	71	71	71	71	71
Q15172	PPP2R5A	Serine/threonine-protein phosphatase 2A 56 kDa regulatory subunit alpha isoform	2A5A_HUMAN	5.6e-10	0	0	0	0	0	0	0	0	0	0	0	0	2	2	2	0	0	0	2	0	0	0	0	0	0	2	0	2	2	2	0	0	0	0	2	0	0	0	0	0	0	0	2	0	0
Q15181	PPA1	Inorganic pyrophosphatase	IPYR_HUMAN	1.2e-15	12	12	12	12	12	12	0	0	0	12	12	12	12	12	12	12	12	0	12	12	0	12	12	12	12	12	12	12	12	12	12	12	0	12	12	12	12	12	12	12	12	0	12	12	12
Q15185	PTGES3	Prostaglandin E synthase 3	TEBP_HUMAN	3.98e-18	3	3	3	3	3	3	0	3	0	3	3	3	3	3	3	0	3	0	3	3	0	0	0	0	3	3	3	3	3	3	0	3	0	3	3	0	3	3	3	0	0	0	3	0	0
Q15223	NECTIN1	Nectin-1	NECT1_HUMAN	2.1e-21	8	8	8	8	8	8	8	8	8	8	8	8	8	8	8	8	8	8	8	8	8	8	8	8	8	8	8	8	8	8	8	8	8	8	8	8	8	8	8	8	8	8	8	8	8
Q15257	PTPA	Serine/threonine-protein phosphatase 2A activator	PTPA_HUMAN	5.98e-29	5	5	5	5	5	5	0	0	0	5	5	5	5	5	5	5	5	5	5	5	0	5	5	5	5	5	5	5	5	5	0	5	0	5	5	5	5	5	5	5	5	5	5	5	5
Q15262	PTPRK	Receptor-type tyrosine-protein phosphatase kappa	PTPRK_HUMAN	7.51e-22	0	5	5	5	5	5	0	0	0	5	5	5	5	5	5	5	5	5	5	0	0	5	5	5	5	5	5	5	5	5	5	5	0	5	5	5	5	5	5	5	5	0	5	5	0
Q15274	QPRT	Nicotinate-nucleotide pyrophosphorylase [carboxylating]	NADC_HUMAN	2.73e-22	7	7	7	7	7	7	7	0	0	7	7	7	7	7	7	7	7	7	7	0	0	7	7	7	7	7	7	7	7	7	7	7	0	7	7	7	7	7	7	7	7	7	7	7	7
Q15293	RCN1	Reticulocalbin-1	RCN1_HUMAN	5.59e-11	7	7	7	7	7	7	7	7	7	7	7	7	7	7	7	7	7	7	7	7	7	7	7	7	7	7	7	7	7	7	7	7	0	7	7	7	7	7	7	7	7	7	7	7	7
Q15303	ERBB4	Receptor tyrosine-protein kinase erbB-4	ERBB4_HUMAN	7.13e-15	3	3	3	3	3	3	0	0	0	3	3	3	3	3	3	3	3	3	3	0	0	3	3	3	3	3	3	3	3	3	3	3	0	3	3	3	3	3	3	0	0	0	3	0	0
Q15323	KRT31	Keratin, type I cuticular Ha1	K1H1_HUMAN	3.09e-21	11	11	11	11	11	11	11	11	11	11	11	11	11	11	11	11	11	11	11	11	11	11	11	11	11	11	11	11	11	11	11	11	11	11	11	11	11	11	11	11	11	11	11	11	11
Q15365	PCBP1	Poly(rC)-binding protein 1	PCBP1_HUMAN	3.99e-20	6	6	6	6	6	6	0	6	0	6	6	6	6	6	6	6	6	6	6	0	0	6	6	6	6	6	6	6	6	6	6	6	0	6	6	6	6	6	6	0	0	0	6	0	0
Q15366	PCBP2	Poly(rC)-binding protein 2	PCBP2_HUMAN	1.49e-21	6	6	6	6	6	6	0	0	0	6	6	6	6	6	6	6	6	0	6	0	0	6	6	6	6	6	6	6	6	6	6	6	6	6	6	6	6	6	6	6	0	0	6	6	6
Q15375	EPHA7	Ephrin type-A receptor 7	EPHA7_HUMAN	7.03e-21	12	12	12	12	12	12	12	12	12	12	12	12	12	12	12	12	12	12	12	0	12	12	12	12	12	12	12	12	12	12	12	12	12	12	12	12	12	12	12	12	12	12	12	12	12
Q15417	CNN3	Calponin-3	CNN3_HUMAN	1.91e-24	2	2	2	2	0	2	0	0	0	2	2	2	2	2	2	0	2	0	2	0	0	0	0	2	2	2	2	2	2	2	0	0	0	2	2	2	2	0	2	0	0	0	2	0	2
Q15435	PPP1R7	Protein phosphatase 1 regulatory subunit 7	PP1R7_HUMAN	5.98e-29	6	6	6	6	6	6	0	0	0	6	6	6	6	6	6	6	6	6	6	0	0	6	6	6	6	6	6	6	6	6	6	0	0	6	6	6	6	6	6	6	6	6	6	6	6
Q15437	SEC23B	Protein transport protein Sec23B	SC23B_HUMAN	3.78e-10	0	2	2	0	2	0	0	0	0	2	0	0	2	2	2	0	0	0	0	0	0	2	2	2	0	0	0	2	2	2	0	0	0	0	2	0	2	0	0	0	0	0	2	0	0
Q15485	FCN2	Ficolin-2	FCN2_HUMAN	5.49e-16	10	10	10	10	10	10	10	10	10	10	10	10	10	10	10	10	10	10	10	0	0	10	10	10	10	10	10	10	10	10	10	10	10	10	10	10	10	10	10	10	10	10	10	10	10
Q15493	RGN	Regucalcin	RGN_HUMAN	1.46e-06	2	0	0	2	2	2	0	0	0	2	2	2	2	0	2	0	0	0	2	0	0	2	2	2	2	2	2	2	2	2	0	0	0	2	0	2	2	2	2	0	0	0	2	0	0
Q15517	CDSN	Corneodesmosin	CDSN_HUMAN	4.1e-16	4	4	4	4	4	4	4	4	4	4	4	4	4	4	4	4	4	4	4	4	4	4	4	4	4	4	4	4	4	4	4	4	4	4	4	4	4	4	4	4	4	4	4	4	4
Q15631	TSN	Translin	TSN_HUMAN	2.46e-11	0	0	0	0	0	3	0	0	0	0	0	0	3	3	3	0	0	0	3	0	0	0	0	0	3	3	3	3	3	3	0	0	0	3	3	3	3	3	0	3	3	3	3	3	3
Q15642	TRIP10	Cdc42-interacting protein 4	CIP4_HUMAN	1.45e-08	4	4	4	4	0	4	4	0	4	4	4	4	4	4	4	4	4	4	4	0	4	4	4	4	4	4	4	4	4	4	4	4	0	4	4	4	4	4	4	0	0	4	4	4	0
Q15691	MAPRE1	Microtubule-associated protein RP/EB family member 1	MARE1_HUMAN	7.72e-09	3	3	0	3	3	0	0	0	0	3	3	3	3	3	3	0	3	0	3	0	0	0	3	0	3	3	3	3	3	3	0	0	0	3	3	3	3	0	3	3	0	0	3	0	3
Q15738	NSDHL	Sterol-4-alpha-carboxylate 3-dehydrogenase, decarboxylating	NSDHL_HUMAN	8.44e-20	0	0	0	2	2	0	0	0	0	2	0	2	2	2	2	0	0	0	2	0	0	0	0	0	2	2	2	2	2	2	0	0	0	2	2	0	2	2	0	0	0	0	2	0	0
Q15746	MYLK	Myosin light chain kinase, smooth muscle	MYLK_HUMAN	6.54e-24	4	4	4	4	4	4	4	4	4	4	4	4	4	4	4	4	4	4	4	4	4	4	4	4	4	4	4	4	4	4	4	4	4	4	4	4	4	4	4	4	4	4	4	4	4
Q15828	CST6	Cystatin-M	CYTM_HUMAN	1.66e-27	10	10	10	10	10	10	10	10	10	10	10	10	10	10	10	10	10	10	10	10	10	10	10	10	10	10	10	10	10	10	10	10	10	10	10	10	10	10	10	10	10	10	10	10	10
Q15833	STXBP2	Syntaxin-binding protein 2	STXB2_HUMAN	4.32e-18	4	4	4	4	4	4	0	0	0	4	4	4	4	4	4	0	4	0	4	0	0	4	0	4	4	4	4	4	4	4	4	0	0	4	4	4	4	4	4	4	4	4	4	0	0
Q15847	ADIRF	Adipogenesis regulatory factor	ADIRF_HUMAN	1.1e-14	2	2	2	0	0	0	2	0	2	2	0	2	2	2	2	2	2	2	2	2	2	2	2	2	2	2	2	0	2	2	2	2	2	2	2	2	2	2	2	2	2	2	2	2	2
Q15848	ADIPOQ	Adiponectin	ADIPO_HUMAN	9.95e-22	2	2	2	2	2	2	2	2	2	2	2	2	2	0	2	2	2	2	2	0	2	2	2	2	2	2	2	2	2	2	2	2	0	2	2	2	2	2	2	2	2	2	2	2	2
Q15904	ATP6AP1	V-type proton ATPase subunit S1	VAS1_HUMAN	2.17e-22	8	8	8	8	8	8	8	8	8	8	8	8	8	8	8	8	8	8	8	8	8	8	8	8	8	8	8	8	8	8	8	8	8	8	8	8	8	8	8	8	8	8	8	8	8
Q15907	RAB11B	Ras-related protein Rab-11B	RB11B_HUMAN	1.01e-20	10	10	10	10	10	10	10	10	10	10	10	10	10	10	10	10	10	10	10	0	0	10	10	10	10	10	10	10	10	10	10	10	0	10	10	10	10	10	10	10	10	10	10	10	10
Q15942	ZYX	Zyxin	ZYX_HUMAN	3.36e-11	0	0	0	0	0	0	0	0	0	2	2	2	2	2	2	0	0	0	2	0	0	0	0	2	2	2	2	0	0	0	0	0	0	2	2	0	0	0	0	0	0	0	2	0	0
Q16181	45176	Septin-7	SEPT7_HUMAN	1.6e-10	3	0	3	0	0	0	0	0	0	3	0	3	3	3	3	3	3	0	3	0	0	0	0	3	3	0	3	0	3	0	0	0	0	0	0	3	3	3	3	0	0	0	0	0	0
Q16186	ADRM1	Proteasomal ubiquitin receptor ADRM1	ADRM1_HUMAN	3.92e-07	2	0	0	2	2	0	0	0	0	2	2	2	2	2	2	0	0	0	2	0	0	2	2	2	2	2	2	2	2	2	2	0	0	2	2	2	2	2	2	2	2	0	2	0	2
Q16270	IGFBP7	Insulin-like growth factor-binding protein 7	IBP7_HUMAN	5.98e-29	18	18	18	18	18	18	18	18	18	18	18	18	18	18	18	18	18	18	18	18	18	18	18	18	18	18	18	18	18	18	18	18	18	18	18	18	18	18	18	18	18	18	18	18	18
Q16363	LAMA4	Laminin subunit alpha-4	LAMA4_HUMAN	7.23e-23	5	5	5	5	5	5	5	5	5	5	5	5	5	5	5	5	5	5	5	5	5	5	5	5	5	5	5	5	5	5	5	5	5	5	5	5	5	5	5	5	5	5	5	5	5
Q16378	PRR4	Proline-rich protein 4	PROL4_HUMAN	6.37e-17	2	2	2	2	2	0	2	2	2	2	2	2	2	2	2	2	2	0	2	2	2	2	2	2	2	2	2	2	2	2	2	2	0	2	2	2	2	2	2	2	2	2	2	2	2
Q16401	PSMD5	26S proteasome non-ATPase regulatory subunit 5	PSMD5_HUMAN	3.69e-17	3	3	3	3	3	3	0	0	0	3	3	3	3	3	3	0	0	0	3	0	0	0	0	0	3	3	3	3	3	3	0	0	0	3	3	3	3	3	3	3	3	3	3	3	3
Q16531	DDB1	DNA damage-binding protein 1	DDB1_HUMAN	4.07e-22	14	14	14	14	14	14	0	14	14	14	14	14	14	14	14	14	14	0	14	0	0	14	14	0	14	14	14	14	14	14	14	14	0	14	14	14	14	14	14	14	14	14	14	14	14
Q16581	C3AR1	C3a anaphylatoxin chemotactic receptor	C3AR_HUMAN	1.33e-24	3	3	3	3	3	3	3	3	3	3	3	3	3	3	3	3	3	3	3	3	3	3	3	3	3	3	3	3	3	3	3	3	3	3	3	3	3	3	3	3	3	3	3	3	3
Q16609	LPAL2	Putative apolipoprotein(a)-like protein 2	LPAL2_HUMAN	3.32e-14	2	2	2	0	0	0	2	2	2	2	2	2	2	0	2	2	2	2	2	2	2	2	2	2	2	2	2	2	2	2	2	2	2	2	2	2	2	2	2	2	2	2	2	2	2
Q16610	ECM1	Extracellular matrix protein 1	ECM1_HUMAN	8.11e-28	25	25	25	25	25	25	25	25	25	25	25	25	25	25	25	25	25	25	25	25	25	25	25	25	25	25	25	25	25	25	25	25	25	25	25	25	25	25	25	25	25	25	25	25	25
Q16620	NTRK2	BDNF/NT-3 growth factors receptor	NTRK2_HUMAN	9.41e-11	0	2	2	2	2	0	2	2	2	2	0	2	2	2	2	2	2	2	2	2	2	0	2	2	2	2	2	2	2	2	2	2	2	2	2	2	2	0	2	2	0	2	2	2	2
Q16651	PRSS8	Prostasin	PRSS8_HUMAN	2.4e-26	6	6	6	6	6	6	6	6	6	6	6	6	6	6	6	6	6	6	6	6	6	6	6	6	6	6	6	6	6	6	6	6	6	6	6	6	6	6	6	6	6	6	6	6	6
Q16658	FSCN1	Fascin	FSCN1_HUMAN	2.98e-22	0	2	2	0	0	0	0	0	0	2	2	0	2	2	2	0	2	0	0	0	0	0	2	2	2	2	2	2	2	2	0	0	0	0	0	2	0	0	0	0	0	0	2	0	0
Q16661	GUCA2B	Guanylate cyclase activator 2B	GUC2B_HUMAN	5.88e-21	3	3	3	3	3	3	3	3	0	3	3	3	3	3	3	0	3	0	3	3	3	3	3	3	3	3	3	3	3	3	3	3	3	3	0	0	3	3	3	3	3	3	3	3	3
Q16698	DECR1	2,4-dienoyl-CoA reductase, mitochondrial	DECR_HUMAN	1.93e-26	10	10	10	10	10	10	0	10	0	10	10	10	10	10	10	10	10	10	10	0	0	10	10	10	10	10	10	10	10	10	10	10	0	10	10	10	10	10	10	10	10	10	10	10	10
Q16706	MAN2A1	Alpha-mannosidase 2	MA2A1_HUMAN	1.12e-21	17	17	17	17	17	17	17	17	17	17	17	17	17	17	17	17	17	17	17	17	17	17	17	17	17	17	17	17	17	17	17	17	0	17	17	17	17	17	17	17	17	17	17	17	17
Q16762	TST	Thiosulfate sulfurtransferase	THTR_HUMAN	2.91e-13	0	5	0	0	0	5	0	0	0	0	5	5	5	5	5	5	0	0	5	0	0	0	5	5	5	5	5	5	5	5	5	0	0	0	5	5	0	5	5	5	0	5	5	5	0
Q16769	QPCT	Glutaminyl-peptide cyclotransferase	QPCT_HUMAN	2e-27	14	14	14	14	14	14	14	14	14	14	14	14	14	14	14	14	14	14	14	14	14	14	14	14	14	14	14	14	14	14	14	14	14	14	14	14	14	14	14	14	14	14	14	14	14
Q16775	HAGH	Hydroxyacylglutathione hydrolase, mitochondrial	GLO2_HUMAN	5.22e-19	0	3	3	3	3	3	0	3	0	3	3	3	3	3	3	3	3	3	3	3	0	0	3	3	3	3	3	3	3	3	3	0	0	3	3	3	3	3	3	3	0	3	3	0	0
Q16787	LAMA3	Laminin subunit alpha-3	LAMA3_HUMAN	1.15e-17	4	4	4	4	4	4	4	4	4	4	4	4	4	4	4	4	4	4	4	0	4	4	4	4	4	4	4	4	4	4	4	4	0	4	4	4	4	4	4	4	4	4	4	4	4
Q16819	MEP1A	Meprin A subunit alpha	MEP1A_HUMAN	5.24e-14	3	3	3	3	3	3	3	3	3	3	3	3	3	3	3	3	3	3	3	3	3	3	3	3	3	3	3	3	3	3	3	3	3	3	3	3	3	3	3	3	3	3	3	3	3
Q16827	PTPRO	Receptor-type tyrosine-protein phosphatase O	PTPRO_HUMAN	1.15e-25	5	5	5	0	0	0	0	0	0	5	5	5	5	5	5	5	5	5	5	0	0	0	0	5	5	5	5	5	5	5	5	5	0	5	5	5	5	5	5	5	5	5	5	5	5
Q16831	UPP1	Uridine phosphorylase 1	UPP1_HUMAN	8.43e-17	0	0	0	5	0	0	0	0	0	0	0	0	5	5	5	0	0	0	5	0	0	0	0	0	5	5	0	5	5	5	0	0	0	0	0	0	0	0	0	0	0	0	5	0	0
Q16832	DDR2	Discoidin domain-containing receptor 2	DDR2_HUMAN	2.32e-15	7	0	7	7	7	7	0	7	0	7	7	7	7	7	7	7	7	7	7	7	7	7	7	7	7	7	7	7	7	7	7	7	7	7	7	7	7	7	7	7	7	0	7	7	7
Q16849	PTPRN	Receptor-type tyrosine-protein phosphatase-like N	PTPRN_HUMAN	8.48e-23	5	5	5	5	5	5	5	5	5	5	5	5	5	5	5	5	5	5	5	5	5	5	5	5	5	5	5	5	5	5	5	5	5	5	5	5	5	5	5	5	5	5	5	5	5
Q16851	UGP2	UTP--glucose-1-phosphate uridylyltransferase	UGPA_HUMAN	3.76e-18	9	9	9	9	9	9	0	0	0	9	9	9	9	9	9	9	9	9	9	0	0	0	0	0	9	9	9	9	9	9	9	9	0	9	9	9	9	9	9	9	9	9	9	9	9
Q16890	TPD52L1	Tumor protein D53	TPD53_HUMAN	5.7e-24	0	2	2	2	0	0	0	0	0	0	2	0	2	2	2	0	0	0	2	0	0	0	2	0	2	2	2	2	2	2	2	0	0	2	2	2	2	2	0	2	0	0	2	2	0
Q1EHB4	SLC5A12	Sodium-coupled monocarboxylate transporter 2	SC5AC_HUMAN	5.79e-12	3	3	3	3	3	3	0	0	0	0	3	3	3	3	3	3	3	3	3	3	3	3	3	3	3	3	3	3	3	3	3	0	0	3	3	3	3	3	3	3	3	0	3	3	0
Q24JP5	TMEM132A	Transmembrane protein 132A	T132A_HUMAN	6.54e-24	10	10	10	0	10	10	10	10	0	10	10	10	10	10	10	10	10	10	10	0	0	10	10	0	10	10	10	10	10	10	10	10	0	10	10	10	10	10	10	0	0	0	10	10	0
Q2TAA2	IAH1	Isoamyl acetate-hydrolyzing esterase 1 homolog	IAH1_HUMAN	7.8e-08	0	0	0	2	2	2	0	0	0	2	2	2	2	0	2	0	2	0	2	0	0	2	2	0	2	2	2	2	2	2	0	0	0	2	2	0	2	0	0	0	0	0	2	2	2
Q2UY09	COL28A1	Collagen alpha-1(XXVIII) chain	COSA1_HUMAN	4.39e-18	4	4	4	4	4	4	4	4	4	4	4	4	4	4	4	4	4	4	4	4	4	4	4	4	4	4	4	4	4	4	4	4	4	4	4	4	4	4	4	4	4	4	4	4	4
Q3LXA3	TKFC	Triokinase/FMN cyclase	TKFC_HUMAN	4.49e-23	14	14	14	14	14	14	14	14	0	14	14	14	14	14	14	14	14	14	14	14	14	14	14	14	14	14	14	14	14	14	14	14	14	14	14	14	14	14	14	14	14	14	14	14	14
Q3ZCW2	LGALSL	Galectin-related protein	LEGL_HUMAN	3.14e-22	0	4	0	0	0	4	0	0	0	4	4	4	4	4	4	0	0	0	4	0	0	0	4	0	4	4	4	4	4	4	0	0	0	0	4	0	0	4	0	0	0	0	0	0	0
Q495M3	SLC36A2	Proton-coupled amino acid transporter 2	S36A2_HUMAN	3.97e-23	7	7	7	7	7	7	0	0	0	7	7	7	7	7	7	7	7	7	7	0	0	7	7	7	7	7	7	7	7	7	7	7	0	7	7	7	7	7	7	7	0	7	7	0	7
Q496F6	CD300E	CMRF35-like molecule 2	CLM2_HUMAN	2.44e-22	7	7	7	7	7	7	7	7	7	7	7	7	7	7	7	7	7	7	7	7	7	7	7	7	7	7	7	7	7	7	7	7	7	7	7	7	7	7	7	7	7	7	7	7	7
Q4G0I0	CCSMST1	Protein CCSMST1	CSMT1_HUMAN	1.57e-18	2	2	2	0	0	2	2	2	2	2	0	0	2	0	2	2	2	2	2	2	2	2	2	2	2	2	2	2	2	2	2	2	0	2	2	2	2	2	2	2	2	2	2	2	2
Q4LDE5	SVEP1	Sushi, von Willebrand factor type A, EGF and pentraxin domain-containing protein 1	SVEP1_HUMAN	1.73e-19	3	3	3	3	3	3	3	3	3	3	3	3	3	3	3	3	3	3	3	3	3	3	3	3	3	3	3	3	3	3	3	3	3	3	3	3	3	3	3	3	3	3	3	3	3
Q53FA7	TP53I3	Quinone oxidoreductase PIG3	QORX_HUMAN	8.91e-21	10	10	10	10	10	10	10	10	0	10	10	10	10	10	10	10	10	10	10	0	0	10	10	10	10	10	10	10	10	10	10	10	0	10	10	10	10	10	10	10	10	10	10	0	10
Q53GD3	SLC44A4	Choline transporter-like protein 4	CTL4_HUMAN	3.95e-19	5	5	5	5	5	5	5	5	0	5	5	5	5	5	5	5	5	5	5	0	0	5	5	5	5	5	5	5	5	5	5	5	0	5	5	5	5	5	5	5	5	5	5	5	5
Q53H76	PLA1A	Phospholipase A1 member A	PLA1A_HUMAN	1.86e-25	5	0	5	0	0	0	0	0	0	5	5	5	5	5	5	5	5	5	5	0	0	0	0	0	5	5	5	0	5	5	5	0	0	5	5	5	5	5	5	5	5	5	5	5	5
Q53RD9	FBLN7	Fibulin-7	FBLN7_HUMAN	4.54e-23	10	10	10	10	10	10	10	10	10	10	10	10	10	10	10	10	10	10	10	10	10	10	10	10	10	10	10	10	10	10	10	10	10	10	10	10	10	10	10	10	10	10	10	10	10
Q53TN4	CYBRD1	Cytochrome b reductase 1	CYBR1_HUMAN	1.18e-09	3	3	3	3	3	0	3	3	3	3	3	3	3	3	3	3	3	3	3	0	0	0	3	3	3	3	3	3	3	3	3	3	3	3	3	3	3	0	3	3	3	0	3	3	3
Q5BJF6	ODF2	Outer dense fiber protein 2	ODFP2_HUMAN	2.3e-23	6	0	0	0	6	6	0	0	0	6	6	6	6	6	0	0	0	0	6	0	0	6	0	0	6	6	0	6	6	0	6	6	0	6	0	0	0	6	6	6	6	6	0	6	6
Q5D862	FLG2	Filaggrin-2	FILA2_HUMAN	1.46e-23	8	8	8	8	8	8	8	8	8	8	8	8	8	8	8	8	8	8	8	0	0	8	8	8	8	8	8	8	8	8	8	8	0	8	8	8	8	0	8	8	0	8	8	8	8
Q5FWE3	PRRT3	Proline-rich transmembrane protein 3	PRRT3_HUMAN	1.26e-10	3	3	3	3	3	3	3	3	3	3	3	3	3	3	3	3	3	3	3	3	3	3	3	3	3	3	3	3	3	3	3	3	3	3	3	3	3	3	3	3	3	3	3	3	3
Q5IJ48	CRB2	Protein crumbs homolog 2	CRUM2_HUMAN	2.76e-24	13	13	13	13	13	13	13	13	13	13	13	13	13	13	13	13	13	13	13	0	0	13	13	13	13	13	13	13	13	13	13	13	13	13	13	13	13	13	13	13	13	13	13	13	13
Q5JQC9	AKAP4	A-kinase anchor protein 4	AKAP4_HUMAN	2.77e-21	21	21	21	21	21	21	0	0	21	21	21	21	21	21	21	21	21	21	21	21	21	0	21	21	21	21	21	0	21	21	21	21	0	21	21	21	21	21	21	21	21	21	21	21	21
Q5JRA6	MIA3	Transport and Golgi organization protein 1 homolog	TGO1_HUMAN	8.8e-24	8	8	8	8	8	8	8	8	8	8	8	8	8	8	8	8	8	8	8	8	8	8	8	8	8	8	8	8	8	8	8	8	0	8	8	8	8	8	8	8	0	0	8	8	8
Q5JS37	NHLRC3	NHL repeat-containing protein 3	NHLC3_HUMAN	1.42e-23	8	8	8	8	8	8	8	8	8	8	8	8	8	8	8	8	8	8	8	8	8	8	8	8	8	8	8	8	8	8	8	8	8	8	8	8	8	8	8	8	8	8	8	8	8
Q5JXA9	SIRPB2	Signal-regulatory protein beta-2	SIRB2_HUMAN	1.83e-23	7	7	7	7	7	7	7	7	7	7	7	7	7	7	7	7	7	7	7	0	7	7	7	7	7	7	7	7	7	7	7	7	0	7	7	7	7	7	7	7	7	7	7	7	7
Q5JZY3	EPHA10	Ephrin type-A receptor 10	EPHAA_HUMAN	2.42e-15	2	2	2	0	2	2	0	0	0	2	2	2	2	2	2	2	2	0	2	0	0	2	2	2	2	2	2	2	2	2	2	2	0	2	2	2	2	2	2	0	0	0	2	0	0
Q5K651	SAMD9	Sterile alpha motif domain-containing protein 9	SAMD9_HUMAN	1.3e-13	0	0	9	9	9	0	0	0	0	9	9	9	9	9	9	0	0	0	0	0	0	0	0	0	9	9	9	9	9	9	0	0	0	0	0	0	0	0	0	0	0	0	9	0	0
Q5KU26	COLEC12	Collectin-12	COL12_HUMAN	1.82e-20	11	11	11	11	11	11	11	11	11	11	11	11	11	11	11	11	11	11	11	11	11	11	11	11	11	11	11	11	11	11	11	11	11	11	11	11	11	11	11	11	11	11	11	11	11
Q5R3I4	TTC38	Tetratricopeptide repeat protein 38	TTC38_HUMAN	3.12e-18	6	6	6	6	6	6	0	0	0	6	6	6	6	6	6	6	6	0	6	0	0	6	6	6	6	6	6	6	6	6	6	6	0	6	6	6	6	6	6	6	6	6	6	6	6
Q5SZK8	FREM2	FRAS1-related extracellular matrix protein 2	FREM2_HUMAN	1.87e-24	59	59	59	59	59	59	59	59	59	59	59	59	59	59	59	59	59	59	59	59	59	59	59	59	59	59	59	59	59	59	59	59	0	59	59	59	59	59	59	59	59	59	59	59	59
Q5T0Z8	C6orf132	Uncharacterized protein C6orf132	CF132_HUMAN	1.59e-09	0	3	3	0	3	0	0	0	0	0	0	3	3	3	3	0	0	0	3	0	0	0	0	0	3	3	3	0	0	0	3	3	0	3	3	3	0	0	0	0	0	0	3	0	0
Q5T2W1	PDZK1	Na(+)/H(+) exchange regulatory cofactor NHE-RF3	NHRF3_HUMAN	2.66e-20	14	14	14	14	14	14	0	14	14	14	14	14	14	14	14	14	14	14	14	14	14	14	14	14	14	14	14	14	14	14	14	14	0	14	14	14	14	14	14	14	14	14	14	14	14
Q5T4S7	UBR4	E3 ubiquitin-protein ligase UBR4	UBR4_HUMAN	3.78e-06	0	0	0	0	0	0	0	0	0	0	0	0	3	3	3	0	0	0	3	0	0	0	0	0	3	0	0	3	3	3	0	0	0	0	0	0	3	0	0	0	0	0	3	0	0
Q5T749	KPRP	Keratinocyte proline-rich protein	KPRP_HUMAN	2.42e-20	11	11	11	11	11	11	11	11	11	11	11	11	11	11	11	11	11	11	11	11	11	11	11	11	11	11	11	11	11	11	11	11	0	11	11	11	11	11	11	11	11	11	11	11	11
Q5TDH0	DDI2	Protein DDI1 homolog 2	DDI2_HUMAN	4.91e-10	4	4	4	4	4	0	0	0	0	4	4	4	4	4	4	0	4	0	4	0	0	4	4	4	4	4	4	4	4	4	4	4	0	4	4	4	4	4	0	4	4	0	4	4	0
Q5TFQ8	SIRPB1	Signal-regulatory protein beta-1 isoform 3	SIRBL_HUMAN	4.36e-05	2	0	0	2	0	2	0	0	0	2	2	2	0	0	0	2	2	2	2	0	0	0	0	0	2	2	2	2	2	2	0	0	0	0	0	0	0	0	0	0	0	0	2	0	0
Q5UCC4	EMC10	ER membrane protein complex subunit 10	EMC10_HUMAN	4.01e-09	4	4	4	4	4	4	4	4	4	4	4	4	4	4	4	4	0	4	4	4	4	4	4	4	4	4	4	4	4	4	4	4	4	4	4	4	4	4	4	4	4	4	4	4	0
Q5VT79	ANXA8L1	Annexin A8-like protein 1	AXA81_HUMAN	1.38e-18	16	16	16	16	16	16	0	16	0	16	16	16	16	16	16	16	16	16	16	16	0	16	16	16	16	16	16	16	16	16	16	16	0	16	16	16	16	16	16	16	16	16	16	0	16
Q5VUB5	FAM171A1	Protein FAM171A1	F1711_HUMAN	4.21e-16	4	4	4	4	4	4	0	0	0	4	4	4	4	4	4	0	4	0	4	0	0	4	4	4	4	4	4	4	4	4	4	0	0	4	4	4	4	4	4	0	0	0	4	0	0
Q5VVQ6	YOD1	Ubiquitin thioesterase OTU1	OTU1_HUMAN	4.26e-06	0	2	0	0	0	2	0	0	0	2	0	2	2	2	2	0	0	0	2	0	0	2	0	0	2	2	2	2	2	2	0	0	0	2	2	2	0	2	2	0	0	0	2	0	0
Q5VW32	BROX	BRO1 domain-containing protein BROX	BROX_HUMAN	3.05e-21	9	9	9	9	9	9	9	9	9	9	9	9	9	9	9	9	9	9	9	0	0	9	9	9	9	9	9	9	9	9	9	9	9	9	9	9	9	9	9	9	9	9	9	9	9
Q5VY43	PEAR1	Platelet endothelial aggregation receptor 1	PEAR1_HUMAN	1.62e-20	10	10	10	10	10	10	10	10	10	10	10	10	10	10	10	10	10	10	10	10	10	10	10	10	10	10	10	10	10	10	10	10	0	10	10	10	10	10	10	10	10	10	10	10	10
Q5VYJ5	MALRD1	MAM and LDL-receptor class A domain-containing protein 1	MALR1_HUMAN	1.55e-07	2	2	2	2	2	2	0	0	0	0	2	2	2	0	0	2	2	0	0	0	0	2	2	2	2	2	2	2	2	2	0	0	0	0	0	2	2	2	2	2	0	0	0	2	0
Q5ZPR3	CD276	CD276 antigen	CD276_HUMAN	7.05e-27	7	7	7	7	7	7	7	7	7	7	7	7	7	7	7	7	7	7	7	7	7	7	7	7	7	7	7	7	7	7	7	7	7	7	7	7	7	7	7	7	7	7	7	7	7
Q66K79	CPZ	Carboxypeptidase Z	CBPZ_HUMAN	2.6e-21	7	7	7	7	7	7	7	7	7	7	7	7	7	7	7	7	7	7	7	0	0	7	7	7	7	7	7	7	7	7	7	7	0	7	7	7	7	7	7	7	7	7	7	7	7
Q68CJ9	CREB3L3	Cyclic AMP-responsive element-binding protein 3-like protein 3	CR3L3_HUMAN	3.85e-12	3	3	3	3	3	3	3	3	3	3	3	3	3	3	3	3	3	3	3	3	3	3	3	3	3	3	3	3	3	3	3	3	3	3	3	3	3	3	3	3	3	3	3	3	3
Q68D85	NCR3LG1	Natural cytotoxicity triggering receptor 3 ligand 1	NR3L1_HUMAN	5.98e-29	7	7	7	7	7	7	7	7	7	7	7	7	7	7	7	7	7	7	7	7	7	7	7	7	7	7	7	7	7	7	7	7	7	7	7	7	7	7	7	7	7	7	7	7	7
Q6B0K9	HBM	Hemoglobin subunit mu	HBM_HUMAN	1.26e-20	5	5	5	5	5	5	0	0	0	5	5	5	5	5	5	5	5	5	5	0	0	5	5	5	5	5	5	5	5	5	5	5	0	5	5	5	5	5	5	5	0	0	5	0	0
Q6DD88	ATL3	Atlastin-3	ATLA3_HUMAN	7.78e-14	0	0	0	0	0	0	0	0	0	0	0	0	2	2	2	0	0	0	0	0	0	0	2	2	0	0	0	2	2	2	0	0	0	0	0	0	2	0	0	0	0	0	2	0	0
Q6E0U4	DMKN	Dermokine	DMKN_HUMAN	1.06e-17	4	4	4	4	4	4	4	4	4	4	4	4	4	4	4	4	4	4	4	4	4	4	4	4	4	4	4	4	4	4	4	4	4	4	4	4	4	4	4	4	4	4	4	4	4
Q6EMK4	VASN	Vasorin	VASN_HUMAN	7.29e-23	12	12	12	12	12	12	12	12	12	12	12	12	12	12	12	12	12	12	12	12	12	12	12	12	12	12	12	12	12	12	12	12	12	12	12	12	12	12	12	12	12	12	12	12	12
Q6FHJ7	SFRP4	Secreted frizzled-related protein 4	SFRP4_HUMAN	1.49e-24	2	2	2	2	2	2	2	2	2	2	2	2	2	2	2	2	2	2	2	2	2	2	2	2	2	2	2	2	2	2	2	2	2	2	2	2	2	2	2	2	2	2	2	2	2
Q6GTS8	PM20D1	N-fatty-acyl-amino acid synthase/hydrolase PM20D1	P20D1_HUMAN	4.75e-19	0	0	0	0	0	0	0	0	0	4	4	0	4	4	4	0	0	0	0	0	0	0	0	0	0	4	0	4	4	0	0	0	0	0	0	0	0	0	0	0	0	0	0	0	0
Q6GTX8	LAIR1	Leukocyte-associated immunoglobulin-like receptor 1	LAIR1_HUMAN	5.34e-17	7	7	7	7	7	7	7	7	7	7	7	7	7	7	7	7	7	7	7	7	7	7	7	7	7	7	7	7	7	7	7	7	7	7	7	7	7	7	7	7	7	7	7	7	7
Q6H9L7	ISM2	Isthmin-2	ISM2_HUMAN	4.06e-11	3	3	3	0	3	3	3	3	3	3	3	3	3	0	3	0	3	3	3	0	3	3	3	3	3	3	3	3	3	3	0	0	0	3	3	3	3	3	3	3	3	3	3	3	3
Q6IBS0	TWF2	Twinfilin-2	TWF2_HUMAN	9.49e-23	5	5	5	5	5	0	0	0	0	5	5	5	5	5	5	5	0	0	5	0	0	5	5	0	5	5	0	5	5	5	0	5	0	5	5	5	5	5	5	5	0	0	5	0	0
Q6ISS4	LAIR2	Leukocyte-associated immunoglobulin-like receptor 2	LAIR2_HUMAN	8.95e-15	6	6	6	6	6	6	6	6	6	6	6	6	6	6	6	6	6	6	6	6	6	6	6	6	6	6	6	6	6	6	6	6	6	6	6	6	6	6	6	6	6	6	6	6	6
Q6KB66	KRT80	Keratin, type II cytoskeletal 80	K2C80_HUMAN	7.14e-20	10	10	10	10	10	10	10	10	10	10	10	10	10	10	10	10	10	10	10	10	10	10	10	10	10	10	10	10	10	10	10	10	0	10	10	10	10	10	10	10	0	10	10	10	10
Q6NUS6	TCTN3	Tectonic-3	TECT3_HUMAN	1.2e-21	3	3	3	3	3	3	3	3	0	3	3	3	3	3	3	3	3	3	3	0	0	3	3	3	3	3	3	3	3	3	3	3	0	3	3	3	3	3	3	3	3	3	3	3	3
Q6P1N0	CC2D1A	Coiled-coil and C2 domain-containing protein 1A	C2D1A_HUMAN	3.21e-06	2	2	2	2	2	2	2	2	0	2	2	2	2	2	2	0	2	2	2	0	0	2	0	0	2	2	2	2	2	2	2	2	0	2	2	2	2	2	0	2	0	2	2	0	2
Q6P4A8	PLBD1	Phospholipase B-like 1	PLBL1_HUMAN	5.76e-24	8	8	8	8	8	8	0	0	0	8	8	8	8	8	8	8	8	8	8	0	0	8	8	8	8	8	8	8	8	8	8	8	0	8	8	8	8	8	8	8	8	8	8	8	8
Q6P4E1	CASC4	Protein CASC4	CASC4_HUMAN	5.58e-17	2	2	2	0	2	2	2	2	2	2	2	2	2	2	2	0	2	2	2	2	2	2	2	2	2	2	2	2	2	2	2	2	2	2	2	2	2	2	2	2	2	2	2	2	2
Q6P531	GGT6	Glutathione hydrolase 6	GGT6_HUMAN	4.24e-25	6	6	6	6	6	6	0	6	0	6	6	6	6	6	6	6	6	6	6	6	0	6	6	6	6	6	6	6	6	6	6	6	0	6	6	6	6	6	6	6	6	6	6	6	6
Q6P587	FAHD1	Acylpyruvase FAHD1, mitochondrial	FAHD1_HUMAN	1.21e-11	4	4	4	4	0	0	4	0	0	4	4	4	4	0	4	4	4	0	4	4	0	4	4	4	4	4	4	4	4	4	4	4	4	4	4	4	4	0	4	0	4	4	4	4	0
Q6P9A2	GALNT18	Polypeptide N-acetylgalactosaminyltransferase 18	GLT18_HUMAN	1.24e-20	13	13	13	13	13	13	13	13	0	13	13	13	13	13	13	13	13	13	13	0	0	13	13	13	13	13	13	13	13	13	13	13	0	13	13	13	13	13	13	13	0	0	13	0	13
Q6PCB0	VWA1	von Willebrand factor A domain-containing protein 1	VWA1_HUMAN	2.14e-24	11	11	11	11	11	11	0	11	0	11	11	11	11	11	11	11	11	11	11	0	0	11	11	11	11	11	11	11	11	11	11	11	0	11	11	11	11	11	11	11	11	11	11	11	11
Q6PK18	OGFOD3	2-oxoglutarate and iron-dependent oxygenase domain-containing protein 3	OGFD3_HUMAN	1.79e-21	8	8	8	8	8	8	0	0	0	8	8	8	8	8	8	8	8	8	8	0	0	8	8	8	8	8	8	8	8	8	8	8	8	8	8	8	8	8	8	8	8	8	8	8	8
Q6UVK1	CSPG4	Chondroitin sulfate proteoglycan 4	CSPG4_HUMAN	1.33e-24	28	28	28	28	28	28	28	28	28	28	28	28	28	28	28	28	28	28	28	28	28	28	28	28	28	28	28	28	28	28	28	28	28	28	28	28	28	28	28	28	28	28	28	28	28
Q6UWI4	SHISA2	Protein shisa-2 homolog	SHSA2_HUMAN	3e-20	3	3	3	3	3	3	3	3	3	3	3	3	3	3	3	3	3	3	3	3	3	3	3	3	3	3	3	3	3	3	3	3	3	3	3	3	3	3	3	3	3	3	3	3	3
Q6UWM5	GLIPR1L1	GLIPR1-like protein 1	GPRL1_HUMAN	5.25e-08	0	0	0	0	0	0	0	0	0	0	0	0	0	0	0	0	0	0	0	0	0	0	0	0	2	0	0	2	0	0	2	0	0	2	0	0	0	0	0	2	2	2	2	2	2
Q6UWP8	SBSN	Suprabasin	SBSN_HUMAN	1.18e-22	27	27	27	27	27	27	27	27	27	27	27	27	27	27	27	27	27	27	27	27	27	27	27	27	27	27	27	27	27	27	27	27	27	27	27	27	27	27	27	27	27	27	27	27	27
Q6UWV6	ENPP7	Ectonucleotide pyrophosphatase/phosphodiesterase family member 7	ENPP7_HUMAN	1.9e-22	5	5	5	5	5	5	0	0	0	5	5	5	5	5	5	5	5	0	5	0	0	5	5	5	5	5	5	5	5	5	5	5	0	5	5	5	5	5	5	5	5	5	5	5	5
Q6UX06	OLFM4	Olfactomedin-4	OLFM4_HUMAN	4.29e-25	14	14	14	14	14	14	14	14	14	14	14	14	14	14	14	14	14	14	14	14	0	14	14	14	14	14	14	14	14	14	14	14	14	14	14	14	14	14	14	14	14	14	14	14	14
Q6UX15	LAYN	Layilin	LAYN_HUMAN	1.66e-19	6	6	6	6	6	6	6	6	6	6	6	6	6	6	6	6	6	6	6	6	6	6	6	6	6	6	6	6	6	6	6	6	6	6	6	6	6	6	6	6	6	6	6	6	6
Q6UX71	PLXDC2	Plexin domain-containing protein 2	PXDC2_HUMAN	6.46e-23	12	12	12	12	12	12	12	12	12	12	12	12	12	12	12	12	12	12	12	12	12	12	12	12	12	12	12	12	12	12	12	12	12	12	12	12	12	12	12	12	12	12	12	12	12
Q6UX73	C16orf89	UPF0764 protein C16orf89	CP089_HUMAN	1.22e-27	11	11	11	11	11	11	0	0	0	11	11	11	11	11	11	11	11	11	11	0	0	11	11	11	11	11	11	11	11	11	11	11	0	11	11	11	11	11	11	11	11	11	11	11	11
Q6UXB4	CLEC4G	C-type lectin domain family 4 member G	CLC4G_HUMAN	6.51e-21	6	6	6	6	6	6	6	6	6	6	6	6	6	6	6	6	6	6	6	6	6	6	6	6	6	6	6	6	6	6	6	6	6	6	6	6	6	6	6	6	6	6	6	6	6
Q6UXB8	PI16	Peptidase inhibitor 16	PI16_HUMAN	1.41e-23	12	12	12	12	12	12	12	12	12	12	12	12	12	12	12	12	12	12	12	12	12	12	12	12	12	12	12	12	12	12	12	12	12	12	12	12	12	12	12	12	12	12	12	12	12
Q6UXD5	SEZ6L2	Seizure 6-like protein 2	SE6L2_HUMAN	2.12e-21	6	6	6	6	6	6	6	6	6	6	6	6	6	6	6	6	6	6	6	6	6	6	6	6	6	6	6	6	6	6	6	6	6	6	6	6	6	6	6	6	6	6	6	6	6
Q6UXG3	CD300LG	CMRF35-like molecule 9	CLM9_HUMAN	3.45e-19	6	6	6	6	6	6	6	6	6	6	6	6	6	6	6	6	6	6	6	6	6	6	6	6	6	6	6	6	6	6	6	6	6	6	6	6	6	6	6	6	6	6	6	6	6
Q6UXI9	NPNT	Nephronectin	NPNT_HUMAN	7.19e-18	3	3	3	3	3	3	3	3	3	3	3	3	3	3	3	3	3	3	3	3	3	3	3	3	3	3	3	3	3	3	3	3	3	3	3	3	3	3	3	3	3	3	3	3	3
Q6UY11	DLK2	Protein delta homolog 2	DLK2_HUMAN	3.23e-20	6	6	6	6	6	6	6	6	6	6	6	6	6	6	6	6	6	6	6	6	6	6	6	6	6	6	6	6	6	6	6	6	6	6	6	6	6	6	6	6	6	6	6	6	6
Q6UY14	ADAMTSL4	ADAMTS-like protein 4	ATL4_HUMAN	4.86e-25	4	4	4	4	4	4	4	4	4	4	4	4	4	4	4	4	4	4	4	4	4	4	4	4	4	4	4	4	4	4	4	4	4	4	4	4	4	4	4	4	4	4	4	4	4
Q6V0I7	FAT4	Protocadherin Fat 4	FAT4_HUMAN	3.39e-28	58	58	58	58	58	58	58	58	58	58	58	58	58	58	58	58	58	58	58	0	0	58	58	58	58	58	58	58	58	58	58	58	58	58	58	58	58	58	58	58	58	58	58	58	58
Q6W4X9	MUC6	Mucin-6	MUC6_HUMAN	3.84e-22	42	42	42	42	42	42	42	42	42	42	42	42	42	42	42	42	42	42	42	0	0	42	42	42	42	42	42	42	42	42	42	42	42	42	42	42	42	42	42	42	42	42	42	42	42
Q6WKZ4	RAB11FIP1	Rab11 family-interacting protein 1	RFIP1_HUMAN	8.18e-20	0	2	2	0	0	2	2	2	2	2	2	2	2	2	2	2	2	2	2	2	2	2	2	2	2	2	2	2	2	2	2	2	2	2	2	2	2	2	2	2	2	0	2	0	0
Q6XQN6	NAPRT	Nicotinate phosphoribosyltransferase	PNCB_HUMAN	1.8e-21	7	7	7	7	7	7	0	0	0	7	7	7	7	7	7	7	7	7	7	0	0	7	7	0	7	7	7	7	7	7	7	7	0	7	7	7	7	7	7	7	7	7	7	7	7
Q6YHK3	CD109	CD109 antigen	CD109_HUMAN	5.98e-29	6	6	6	6	6	6	6	6	6	6	6	6	6	6	6	6	6	6	6	6	6	6	6	6	6	6	6	6	6	6	6	6	0	6	6	6	6	6	6	6	6	6	6	6	6
Q6ZMJ2	SCARA5	Scavenger receptor class A member 5	SCAR5_HUMAN	2.43e-12	4	4	4	4	4	4	4	4	4	4	4	4	4	4	4	4	4	4	4	4	4	4	4	4	4	4	4	4	4	4	4	4	0	4	4	4	4	4	4	4	4	4	4	4	4
Q6ZMR5	TMPRSS11A	Transmembrane protease serine 11A	TM11A_HUMAN	1.97e-19	0	6	6	6	0	0	0	0	0	0	0	0	6	6	6	6	6	6	6	0	0	0	6	0	6	6	6	6	6	6	0	6	0	6	6	6	6	0	0	0	0	0	6	0	0
Q6ZN66	GBP6	Guanylate-binding protein 6	GBP6_HUMAN	8.32e-23	0	18	18	18	18	0	0	18	0	18	18	18	18	18	18	18	18	18	18	18	0	0	18	18	18	18	18	18	18	18	0	18	0	18	18	18	18	18	18	18	18	18	18	18	18
Q6ZNA5	FRRS1	Ferric-chelate reductase 1	FRRS1_HUMAN	1.14e-09	2	2	2	2	2	2	2	2	2	2	2	2	2	2	2	2	2	2	2	2	2	2	2	2	2	2	2	2	2	2	2	2	2	2	2	2	2	2	2	2	2	2	2	2	2
Q6ZRV2	FAM83H	Protein FAM83H	FA83H_HUMAN	2.37e-10	0	0	0	0	0	0	0	0	0	0	0	0	2	2	2	0	0	0	0	0	0	0	0	0	0	0	0	0	2	2	0	0	0	0	0	0	0	0	0	0	0	0	0	0	0
Q6ZSJ9	SHISA6	Protein shisa-6	SHSA6_HUMAN	6.31e-11	2	2	2	2	2	2	2	2	2	2	2	2	2	2	2	2	2	2	2	2	2	2	2	2	2	2	2	2	2	2	2	2	2	2	2	2	2	0	2	2	2	2	2	2	2
Q6ZUI0	TPRG1	Tumor protein p63-regulated gene 1 protein	TPRG1_HUMAN	3.38e-12	0	0	0	0	0	0	0	0	0	0	0	7	7	7	7	0	0	0	0	0	0	0	0	0	7	7	7	7	7	7	0	0	0	0	7	7	0	0	0	0	0	0	7	0	0
Q6ZUM4	ARHGAP27	Rho GTPase-activating protein 27	RHG27_HUMAN	1.77e-14	0	0	2	0	0	0	0	0	0	0	0	0	2	2	2	2	0	0	2	0	0	0	0	0	2	2	2	2	2	2	2	2	0	0	2	2	2	2	0	0	0	0	2	0	0
Q6ZVM7	TOM1L2	TOM1-like protein 2	TM1L2_HUMAN	7.17e-20	0	2	2	0	0	0	0	2	0	2	2	2	2	2	2	2	0	0	2	0	0	0	2	2	2	2	2	2	2	2	0	2	0	2	2	0	0	2	2	0	2	2	2	2	2
Q6ZVN8	HJV	Hemojuvelin	RGMC_HUMAN	5.06e-13	2	0	0	2	0	2	2	2	2	0	2	2	2	0	2	2	2	0	2	2	2	2	2	2	2	2	2	2	2	2	2	2	0	2	2	2	2	2	2	2	2	2	2	2	2
Q6ZVX7	NCCRP1	F-box only protein 50	FBX50_HUMAN	2.01e-24	11	11	11	11	11	11	11	0	11	11	11	11	11	11	11	11	11	11	11	0	0	11	11	11	11	11	11	11	11	11	11	11	0	11	11	11	11	11	11	11	0	0	11	0	0
Q71RC9	SMIM5	Small integral membrane protein 5	SMIM5_HUMAN	7.91e-21	2	2	2	2	2	2	2	2	2	2	2	2	2	2	2	2	2	2	2	2	0	2	2	2	2	2	2	2	2	2	2	2	2	2	2	2	2	2	2	2	2	2	2	2	2
Q7KZF4	SND1	Staphylococcal nuclease domain-containing protein 1	SND1_HUMAN	2.33e-06	0	2	0	0	0	0	0	0	0	2	2	0	2	2	2	0	0	0	2	0	0	0	0	0	2	2	0	2	2	2	0	0	0	2	2	2	0	2	0	0	0	0	2	0	0
Q7L1Q6	BZW1	Basic leucine zipper and W2 domain-containing protein 1	BZW1_HUMAN	4.04e-12	0	0	0	0	0	0	0	0	0	0	0	0	4	4	4	0	0	0	4	0	0	0	0	0	0	0	0	4	4	4	0	0	0	0	0	0	4	0	0	0	0	0	4	0	0
Q7L266	ASRGL1	Isoaspartyl peptidase/L-asparaginase	ASGL1_HUMAN	5.3e-28	5	5	5	5	5	5	0	0	0	5	5	5	5	5	5	5	0	5	5	0	0	5	5	5	5	5	5	5	5	5	5	0	0	5	5	5	5	5	5	5	5	5	5	5	5
Q7L2H7	EIF3M	Eukaryotic translation initiation factor 3 subunit M	EIF3M_HUMAN	4.86e-15	0	4	0	0	4	0	0	0	0	4	4	4	4	4	4	0	4	0	4	0	0	4	4	0	4	4	4	4	4	4	4	0	0	4	4	0	4	4	4	4	0	0	4	4	4
Q7L576	CYFIP1	Cytoplasmic FMR1-interacting protein 1	CYFP1_HUMAN	1.05e-20	7	7	7	7	7	0	0	0	0	7	7	7	7	7	7	7	7	7	7	0	0	0	0	0	7	7	7	7	7	7	7	7	0	7	7	7	7	7	7	7	7	7	7	7	7
Q7L5N1	COPS6	COP9 signalosome complex subunit 6	CSN6_HUMAN	3.06e-25	5	5	5	5	5	5	0	0	0	5	5	0	5	5	5	0	0	0	5	0	0	0	5	0	5	5	5	5	5	5	0	0	0	5	5	5	5	0	5	5	0	0	0	0	0
Q7L9L4;Q9H8S9	MOB1B;MOB1A	MOB kinase activator 1B;MOB kinase activator 1A	MOB1B_HUMAN;MOB1A_HUMAN	7.85e-19	2	2	2	2	2	2	0	0	0	2	2	2	2	2	2	2	2	2	2	0	0	0	0	0	2	2	2	2	2	2	2	2	0	2	2	2	2	2	2	2	2	2	2	2	2
Q7LBR1	CHMP1B	Charged multivesicular body protein 1b	CHM1B_HUMAN	3.26e-14	4	4	4	4	4	4	4	4	4	4	4	4	4	4	4	4	4	4	4	4	4	4	4	4	4	4	4	4	4	4	4	4	4	4	4	4	4	4	4	4	4	4	4	4	4
Q7Z304	MAMDC2	MAM domain-containing protein 2	MAMC2_HUMAN	2.7e-16	0	0	0	2	2	2	0	0	0	2	2	2	2	2	0	0	0	0	2	0	0	2	2	0	2	2	2	2	2	2	2	0	0	2	2	2	2	2	2	2	2	2	2	2	0
Q7Z3B1	NEGR1	Neuronal growth regulator 1	NEGR1_HUMAN	2.03e-20	18	18	18	18	18	18	18	18	18	18	18	18	18	18	18	18	18	18	18	18	18	18	18	18	18	18	18	18	18	18	18	18	18	18	18	18	18	18	18	18	18	18	18	18	18
Q7Z406	MYH14	Myosin-14	MYH14_HUMAN	1.77e-25	27	27	27	27	27	27	27	27	27	27	27	27	27	27	27	27	27	27	27	0	27	27	27	27	27	27	27	27	27	27	27	27	0	27	27	27	27	27	27	27	27	27	27	27	27
Q7Z4F1	LRP10	Low-density lipoprotein receptor-related protein 10	LRP10_HUMAN	2.76e-20	4	4	4	4	4	4	4	4	4	4	4	4	4	4	4	4	4	4	4	4	0	4	4	4	4	4	4	4	4	4	4	4	0	4	4	4	4	4	4	4	0	4	4	4	4
Q7Z4R8	C6orf120	UPF0669 protein C6orf120	CF120_HUMAN	5.98e-29	4	4	4	4	4	4	4	4	4	4	4	4	4	4	4	4	4	4	4	4	4	4	4	4	4	4	4	4	4	4	4	4	0	4	4	4	4	4	4	4	4	4	4	4	4
Q7Z4W1	DCXR	L-xylulose reductase	DCXR_HUMAN	1.83e-20	10	10	10	10	10	10	0	0	0	10	10	10	10	10	10	10	10	10	10	0	0	10	10	10	10	10	10	10	10	10	10	10	10	10	10	10	10	10	10	10	10	10	10	10	10
Q7Z5L0	VMO1	Vitelline membrane outer layer protein 1 homolog	VMO1_HUMAN	2.68e-23	7	7	7	7	7	7	7	7	7	7	7	7	7	7	7	7	7	7	7	7	7	7	7	7	7	7	7	7	7	7	7	7	7	7	7	7	7	7	7	7	7	7	7	7	7
Q7Z5N4	SDK1	Protein sidekick-1	SDK1_HUMAN	1.33e-24	12	12	12	12	12	12	12	12	12	12	12	12	12	12	12	12	12	12	12	12	12	12	12	12	12	12	12	12	12	12	12	12	0	12	12	12	12	12	12	12	12	12	12	12	12
Q7Z6A9	BTLA	B- and T-lymphocyte attenuator	BTLA_HUMAN	5.98e-29	4	4	4	4	4	4	4	4	4	4	4	4	4	4	4	4	4	4	4	4	4	4	4	4	4	4	4	4	4	4	4	4	0	4	4	4	4	4	4	4	4	4	4	4	4
Q7Z6Z7	HUWE1	E3 ubiquitin-protein ligase HUWE1	HUWE1_HUMAN	0.000121057	0	0	0	0	0	0	0	0	0	0	0	0	2	2	2	0	0	0	0	0	0	0	0	0	0	0	0	0	0	0	0	0	0	2	0	0	0	0	0	0	0	0	2	0	0
Q7Z794	KRT77	Keratin, type II cytoskeletal 1b	K2C1B_HUMAN	4.58e-18	5	5	5	0	5	5	5	5	5	5	5	5	5	5	5	5	5	5	5	5	0	5	5	5	5	5	5	5	5	5	5	5	0	5	5	5	5	5	5	5	0	5	0	5	0
Q7Z7D3	VTCN1	V-set domain-containing T-cell activation inhibitor 1	VTCN1_HUMAN	6.02e-23	5	5	5	5	5	5	5	5	5	5	5	5	5	5	5	5	5	5	5	5	5	5	5	5	5	5	5	5	5	0	5	5	5	5	5	5	5	5	5	5	5	5	5	5	5
Q7Z7G0	ABI3BP	Target of Nesh-SH3	TARSH_HUMAN	4.13e-25	11	11	11	11	11	11	11	11	11	11	11	11	11	11	11	11	11	11	11	11	11	11	11	11	11	11	11	11	11	11	11	11	11	11	11	11	11	11	11	11	11	11	11	11	11
Q7Z7M0	MEGF8	Multiple epidermal growth factor-like domains protein 8	MEGF8_HUMAN	5.98e-29	35	35	35	35	35	35	35	35	35	35	35	35	35	35	35	35	35	35	35	35	35	35	35	35	35	35	35	35	35	35	35	35	35	35	35	35	35	35	35	35	35	35	35	35	35
Q7Z7M8	B3GNT8	UDP-GlcNAc:betaGal beta-1,3-N-acetylglucosaminyltransferase 8	B3GN8_HUMAN	2.37e-11	3	3	3	3	3	3	3	3	3	3	3	3	3	3	3	3	3	3	3	3	3	3	3	3	3	3	3	3	3	3	3	3	3	3	3	3	3	3	3	0	3	0	3	3	3
Q86SG5	S100A7A	Protein S100-A7A	S1A7A_HUMAN	1.46e-21	6	6	6	6	6	6	6	6	6	6	6	6	6	6	6	6	6	6	6	6	6	6	6	6	6	6	6	6	6	6	6	6	6	6	6	6	6	6	6	6	6	6	6	6	6
Q86SQ4	ADGRG6	Adhesion G-protein coupled receptor G6	AGRG6_HUMAN	7.77e-28	8	8	8	8	8	8	8	8	8	8	8	8	8	8	8	8	8	8	8	8	8	8	8	8	8	8	8	8	8	8	8	8	0	8	8	8	8	8	8	8	8	8	8	8	8
Q86T13	CLEC14A	C-type lectin domain family 14 member A	CLC14_HUMAN	3.49e-22	15	15	15	15	15	15	15	15	15	15	15	15	15	15	15	15	15	15	15	15	15	15	15	15	15	15	15	15	15	15	15	15	15	15	15	15	15	15	15	15	15	15	15	15	15
Q86T26	TMPRSS11B	Transmembrane protease serine 11B	TM11B_HUMAN	2.44e-22	6	6	6	6	0	0	0	0	0	6	6	6	6	6	6	6	6	6	6	0	0	0	6	6	6	6	6	6	6	6	6	6	0	6	6	6	0	6	6	0	0	0	6	0	0
Q86TD4	SRL	Sarcalumenin	SRCA_HUMAN	3.65e-17	0	0	0	0	0	0	3	3	3	3	0	3	3	3	3	3	3	3	3	3	3	3	3	3	3	3	3	3	3	3	3	3	0	3	3	3	3	3	3	3	3	3	3	3	3
Q86TH1	ADAMTSL2	ADAMTS-like protein 2	ATL2_HUMAN	1.96e-27	14	14	14	14	14	14	14	14	14	14	14	14	14	14	14	14	14	14	14	14	14	14	14	14	14	14	14	14	14	14	14	14	14	14	14	14	14	14	14	14	14	14	14	14	14
Q86TY3	ARMH4	Armadillo-like helical domain-containing protein 4	ARMD4_HUMAN	9.46e-06	0	0	0	2	0	0	2	2	2	2	0	0	0	0	2	2	0	2	0	2	2	0	2	0	0	0	2	2	0	0	2	2	2	2	2	2	0	2	2	2	0	0	2	0	0
Q86UD1	OAF	Out at first protein homolog	OAF_HUMAN	9.43e-14	8	8	8	8	8	8	8	8	8	8	8	8	8	8	8	8	8	8	8	8	8	8	8	8	8	8	8	8	8	8	8	8	8	8	8	8	8	8	8	8	8	8	8	8	8
Q86UN2	RTN4RL1	Reticulon-4 receptor-like 1	R4RL1_HUMAN	9.9e-07	0	3	3	3	3	0	0	0	0	3	3	3	0	3	3	3	0	0	3	0	0	0	0	0	3	3	3	3	3	3	0	0	0	3	3	3	3	3	3	0	0	0	3	0	0
Q86UN3	RTN4RL2	Reticulon-4 receptor-like 2	R4RL2_HUMAN	9e-23	12	12	12	12	12	12	12	12	12	12	12	12	12	12	12	12	12	12	12	12	12	12	12	12	12	12	12	12	12	12	12	12	12	12	12	12	12	12	12	12	12	12	12	12	12
Q86UX2	ITIH5	Inter-alpha-trypsin inhibitor heavy chain H5	ITIH5_HUMAN	2.85e-14	0	0	0	7	7	7	7	7	7	7	7	7	7	7	7	7	7	7	7	7	7	7	0	0	7	7	7	7	7	7	7	7	0	7	7	7	7	7	7	7	7	7	7	7	7
Q86UX7	FERMT3	Fermitin family homolog 3	URP2_HUMAN	0.000362117	2	2	2	0	2	0	0	0	0	0	2	0	2	2	2	2	2	2	2	0	0	2	0	0	0	0	0	0	2	0	2	2	2	2	2	2	2	2	2	0	0	0	0	0	0
Q86V21	AACS	Acetoacetyl-CoA synthetase	AACS_HUMAN	4.39e-05	0	0	0	0	0	0	0	0	0	0	0	0	2	2	2	0	0	0	0	0	0	0	0	0	0	0	0	0	2	2	0	0	0	0	0	0	0	0	0	0	0	0	0	0	0
Q86V85	GPR180	Integral membrane protein GPR180	GP180_HUMAN	2.85e-20	5	5	5	5	5	5	5	5	5	5	5	5	5	5	5	5	5	5	5	5	5	5	5	5	5	5	5	5	5	5	5	5	5	5	5	5	5	5	5	5	5	5	5	5	5
Q86VB7	CD163	Scavenger receptor cysteine-rich type 1 protein M130	C163A_HUMAN	5.83e-15	5	5	5	5	5	5	5	5	5	5	5	5	5	5	5	5	5	5	5	5	5	5	5	5	5	5	5	5	5	5	5	5	5	5	5	5	5	5	5	5	5	5	5	5	5
Q86VN1	VPS36	Vacuolar protein-sorting-associated protein 36	VPS36_HUMAN	3.31e-18	2	2	2	2	2	2	0	0	0	2	2	2	2	2	2	2	2	2	2	2	0	2	2	2	2	2	2	2	2	2	2	2	0	2	2	2	2	2	2	2	2	2	2	2	2
Q86VP6	CAND1	Cullin-associated NEDD8-dissociated protein 1	CAND1_HUMAN	8.36e-25	16	16	16	16	16	16	16	0	0	16	16	16	16	16	16	16	16	16	16	16	0	16	16	16	16	16	16	16	16	16	16	16	0	16	16	16	16	16	16	16	16	16	16	16	16
Q86VR7	VSIG10L	V-set and immunoglobulin domain-containing protein 10-like	VS10L_HUMAN	9.03e-06	3	0	0	0	0	0	3	3	3	3	0	3	3	3	3	3	3	3	3	3	3	3	3	3	3	3	3	0	3	3	3	3	3	3	3	3	0	0	3	0	0	3	3	3	0
Q86VZ4	LRP11	Low-density lipoprotein receptor-related protein 11	LRP11_HUMAN	2.08e-11	2	2	2	2	2	2	2	2	2	2	2	2	2	2	2	2	0	0	2	2	2	2	2	2	2	2	2	2	2	2	2	2	0	2	2	2	2	2	2	0	2	2	2	0	2
Q86X29	LSR	Lipolysis-stimulated lipoprotein receptor	LSR_HUMAN	6.34e-12	6	6	6	6	6	6	6	6	6	6	6	6	6	6	6	6	6	6	6	6	6	6	6	6	6	6	6	6	6	6	6	6	6	6	6	6	6	6	6	6	6	6	6	6	6
Q86XP0	PLA2G4D	Cytosolic phospholipase A2 delta	PA24D_HUMAN	3.29e-19	0	0	0	8	0	0	0	0	0	8	0	0	8	8	8	0	0	0	0	0	0	0	8	8	8	8	8	8	8	8	0	0	0	0	0	8	8	8	0	0	0	0	8	0	0
Q86XT2	VPS37D	Vacuolar protein sorting-associated protein 37D	VP37D_HUMAN	1.13e-20	5	5	5	5	5	5	5	5	5	5	5	5	5	5	5	5	5	5	5	5	5	5	5	5	5	5	5	5	5	5	5	5	0	5	5	5	5	5	5	5	5	5	5	5	5
Q86Y38	XYLT1	Xylosyltransferase 1	XYLT1_HUMAN	2.89e-16	2	2	2	2	2	2	2	2	2	2	2	2	2	2	2	2	2	2	2	2	2	2	2	2	2	2	2	2	2	2	2	2	2	2	2	2	2	2	2	2	2	2	2	2	2
Q86Y78	LYPD6	Ly6/PLAUR domain-containing protein 6	LYPD6_HUMAN	1.15e-11	2	2	2	2	2	0	2	2	2	2	2	2	2	0	0	2	2	2	2	2	2	2	2	2	2	2	2	2	2	2	2	2	0	2	2	2	2	2	2	2	2	2	2	2	2
Q86YQ8	CPNE8	Copine-8	CPNE8_HUMAN	1.3e-09	6	6	6	6	6	6	0	6	0	6	6	6	6	6	6	6	6	0	6	0	0	6	6	0	6	0	6	6	6	6	0	6	0	6	6	6	6	6	6	6	0	6	6	6	6
Q86YT9	JAML	Junctional adhesion molecule-like	JAML_HUMAN	2e-23	7	7	7	7	7	7	0	0	0	7	7	7	7	7	7	7	7	7	7	0	0	7	7	7	7	7	7	7	7	7	7	7	0	7	7	7	7	7	7	7	7	7	7	7	7
Q86YZ3	HRNR	Hornerin	HORN_HUMAN	9.78e-17	9	9	9	9	9	9	9	9	9	9	9	9	9	9	9	9	9	9	9	9	9	9	9	9	9	9	9	9	9	9	9	9	9	9	9	9	9	9	9	9	9	9	9	9	9
Q8IUK5	PLXDC1	Plexin domain-containing protein 1	PLDX1_HUMAN	4.1e-23	9	9	9	9	9	9	9	9	0	9	9	9	9	9	9	9	9	9	9	9	9	9	9	9	9	9	9	9	9	9	9	9	0	9	9	9	9	9	9	9	0	0	9	0	9
Q8IUL8	CILP2	Cartilage intermediate layer protein 2	CILP2_HUMAN	5.98e-29	21	21	21	21	21	21	21	21	21	21	21	21	21	21	21	21	21	21	21	21	21	21	21	21	21	21	21	21	21	21	21	21	21	21	21	21	21	21	21	21	21	21	21	21	21
Q8IV08	PLD3	Phospholipase D3	PLD3_HUMAN	1.02e-23	9	9	9	9	9	9	9	9	9	9	9	9	9	9	9	9	9	9	9	9	9	9	9	9	9	9	9	9	9	9	9	9	9	9	9	9	9	9	9	9	9	9	9	9	9
Q8IVF2	AHNAK2	Protein AHNAK2	AHNK2_HUMAN	6.4e-12	8	8	8	8	8	8	0	8	0	8	8	8	8	8	8	8	8	8	8	0	0	8	0	8	8	8	8	8	8	8	8	8	0	8	8	8	8	8	8	8	0	8	8	8	0
Q8IWA5	SLC44A2	Choline transporter-like protein 2	CTL2_HUMAN	9.99e-26	14	14	14	14	14	14	14	14	14	14	14	14	14	14	14	14	14	14	14	14	14	14	14	14	14	14	14	14	14	14	14	14	14	14	14	14	14	14	14	14	14	14	14	14	14
Q8IWU5	SULF2	Extracellular sulfatase Sulf-2	SULF2_HUMAN	3.39e-14	3	3	3	3	3	3	3	3	3	3	3	3	3	3	3	3	3	3	3	3	3	3	3	3	3	3	3	3	3	3	3	3	3	3	3	3	3	3	3	3	3	3	3	3	3
Q8IWV2	CNTN4	Contactin-4	CNTN4_HUMAN	5.8e-05	0	0	0	0	0	0	0	0	0	0	0	2	2	0	2	0	0	0	2	0	0	0	0	0	2	2	2	2	2	2	0	0	0	2	2	0	2	2	0	0	0	0	2	0	0
Q8IWY4	SCUBE1	Signal peptide, CUB and EGF-like domain-containing protein 1	SCUB1_HUMAN	5.86e-18	2	2	2	2	2	2	2	2	2	2	2	2	2	2	2	2	2	2	2	0	2	2	2	2	2	2	2	2	2	2	2	2	2	2	2	2	2	2	2	2	2	2	2	2	2
Q8IX04	UEVLD	Ubiquitin-conjugating enzyme E2 variant 3	UEVLD_HUMAN	1.1e-22	5	5	5	5	5	5	0	0	0	5	5	5	5	5	5	5	5	5	5	0	0	0	0	0	5	5	5	5	5	5	5	5	0	5	5	5	5	5	5	5	5	5	5	5	5
Q8IYS5	OSCAR	Osteoclast-associated immunoglobulin-like receptor	OSCAR_HUMAN	8.22e-28	9	9	9	9	9	9	9	9	9	9	9	9	9	9	9	9	9	9	9	9	9	9	9	9	9	9	9	9	9	9	9	9	9	9	9	9	9	9	9	9	9	9	9	9	9
Q8IZA0	KIAA0319L	Dyslexia-associated protein KIAA0319-like protein	K319L_HUMAN	1.5e-23	7	7	7	7	7	7	7	7	7	7	7	7	7	7	7	7	7	7	7	7	7	7	7	7	7	7	7	7	7	7	7	7	7	7	7	7	7	7	7	7	7	7	7	7	7
Q8IZF2	ADGRF5	Adhesion G protein-coupled receptor F5	AGRF5_HUMAN	5.98e-29	22	22	22	22	22	22	22	22	22	22	22	22	22	22	22	22	22	22	22	22	22	22	22	22	22	22	22	22	22	22	22	22	22	22	22	22	22	22	22	22	22	22	22	22	22
Q8IZJ3	CPAMD8	C3 and PZP-like alpha-2-macroglobulin domain-containing protein 8	CPMD8_HUMAN	2.53e-06	0	0	0	0	0	0	0	0	0	2	2	2	2	2	2	0	0	0	2	0	0	0	0	0	0	0	2	0	2	0	0	0	0	2	2	2	2	0	2	2	0	0	2	0	0
Q8IZP0	ABI1	Abl interactor 1	ABI1_HUMAN	3.08e-16	0	0	2	0	0	0	2	0	2	2	0	0	0	2	2	2	2	0	2	0	0	0	0	0	2	2	2	2	2	2	0	0	0	2	2	2	2	0	0	2	0	0	2	0	0
Q8IZP9	ADGRG2	Adhesion G-protein coupled receptor G2	AGRG2_HUMAN	2.14e-17	5	5	5	5	5	0	5	5	5	5	5	5	5	5	5	5	5	0	5	5	5	5	5	5	5	5	5	5	5	5	5	5	5	5	5	5	5	5	5	5	5	5	5	5	5
Q8N0V5	GCNT2	N-acetyllactosaminide beta-1,6-N-acetylglucosaminyl-transferase	GNT2A_HUMAN	6.06e-14	3	3	3	3	3	0	0	0	0	3	3	3	3	3	3	3	3	3	3	0	0	0	3	3	3	3	3	3	3	3	0	0	0	3	3	3	3	3	3	3	0	0	3	0	3
Q8N114	SHISA5	Protein shisa-5	SHSA5_HUMAN	5.87e-21	4	4	4	4	4	4	4	4	4	4	4	4	4	4	4	4	4	4	4	4	4	4	4	4	4	4	4	4	4	4	4	4	4	4	4	4	4	4	4	4	4	4	4	4	4
Q8N126	CADM3	Cell adhesion molecule 3	CADM3_HUMAN	7.76e-27	6	6	6	6	6	6	6	6	6	6	6	6	6	6	6	6	6	6	6	6	6	6	6	6	6	6	6	6	6	6	6	6	6	6	6	6	6	6	6	6	6	6	6	6	6
Q8N1N4	KRT78	Keratin, type II cytoskeletal 78	K2C78_HUMAN	9.56e-27	25	25	25	25	25	25	25	25	25	25	25	25	25	25	25	25	25	25	25	25	25	25	25	25	25	25	25	25	25	25	25	25	25	25	25	25	25	25	25	25	25	25	25	25	25
Q8N1P7	CRYBG2	Beta/gamma crystallin domain-containing protein 2	CRBG2_HUMAN	8.44e-07	0	0	3	0	0	0	0	0	0	0	0	0	3	3	3	0	0	0	3	0	0	0	0	0	3	3	3	3	3	0	3	3	0	3	3	3	0	3	0	0	0	0	3	0	0
Q8N271	PROM2	Prominin-2	PROM2_HUMAN	7.1e-26	13	13	13	13	13	13	13	13	13	13	13	13	13	13	13	13	13	13	13	13	13	13	13	13	13	13	13	13	13	13	13	13	0	13	13	13	13	13	13	13	13	13	13	13	13
Q8N2G4	LYPD1	Ly6/PLAUR domain-containing protein 1	LYPD1_HUMAN	4.85e-17	3	3	3	3	3	3	3	3	3	3	3	3	3	3	3	3	0	0	3	0	3	3	3	3	3	3	3	3	3	3	3	3	3	3	3	3	3	3	0	0	0	0	3	0	0
Q8N2S1	LTBP4	Latent-transforming growth factor beta-binding protein 4	LTBP4_HUMAN	5.98e-29	25	25	25	25	25	25	25	25	25	25	25	25	25	25	25	25	25	25	25	25	25	25	25	25	25	25	25	25	25	25	25	25	25	25	25	25	25	25	25	25	25	25	25	25	25
Q8N2U0	TMEM256	Transmembrane protein 256	TM256_HUMAN	3.39e-12	2	2	2	2	2	2	0	2	0	2	2	2	2	2	2	2	2	2	2	2	0	2	2	2	2	2	2	2	2	2	2	2	2	2	2	2	2	2	2	2	2	2	2	2	2
Q8N307	MUC20	Mucin-20	MUC20_HUMAN	7.49e-21	10	10	10	10	10	10	10	10	10	10	10	10	10	10	10	10	10	10	10	10	10	10	10	10	10	10	10	10	10	10	10	10	10	10	10	10	10	10	10	10	10	10	10	10	10
Q8N335	GPD1L	Glycerol-3-phosphate dehydrogenase 1-like protein	GPD1L_HUMAN	3.03e-06	2	0	0	2	0	2	0	0	0	2	0	2	2	2	2	2	2	2	2	0	0	0	0	0	2	2	0	0	0	0	0	0	0	2	2	2	2	2	2	2	0	2	2	2	2
Q8N386	LRRC25	Leucine-rich repeat-containing protein 25	LRC25_HUMAN	3.09e-18	5	5	5	5	5	5	5	5	5	5	5	5	5	5	5	5	5	5	5	5	5	5	5	5	5	5	5	5	5	5	5	5	0	5	5	5	5	5	5	5	5	5	5	5	5
Q8N392	ARHGAP18	Rho GTPase-activating protein 18	RHG18_HUMAN	2.12e-17	2	2	2	0	0	0	0	0	0	2	2	2	2	2	2	2	2	2	2	0	0	0	0	0	2	2	2	2	2	2	2	2	0	2	2	0	0	0	0	2	2	2	2	2	2
Q8N3J6	CADM2	Cell adhesion molecule 2	CADM2_HUMAN	3.18e-19	5	5	5	5	5	5	5	5	5	5	5	5	5	5	5	5	5	5	5	5	5	5	5	5	5	5	5	5	5	5	5	5	5	5	5	5	5	5	5	5	5	5	5	5	5
Q8N3R9	MPP5	MAGUK p55 subfamily member 5	MPP5_HUMAN	6.99e-13	3	3	3	3	3	3	3	3	3	3	3	3	3	3	3	3	3	3	3	3	3	3	3	3	3	3	3	3	3	3	3	3	3	3	3	3	3	3	3	3	3	3	3	3	3
Q8N436	CPXM2	Inactive carboxypeptidase-like protein X2	CPXM2_HUMAN	4.05e-15	6	6	0	6	6	6	0	0	0	6	6	6	6	6	6	6	6	6	6	0	0	6	6	6	6	6	6	6	6	6	0	0	0	6	6	6	6	6	6	6	0	0	6	0	0
Q8N474	SFRP1	Secreted frizzled-related protein 1	SFRP1_HUMAN	2.74e-10	6	6	6	6	6	6	6	6	0	6	6	6	6	6	6	6	6	6	6	0	6	6	6	6	6	6	6	6	6	6	6	6	0	6	6	6	6	6	6	0	6	0	6	0	6
Q8N4F0	BPIFB2	BPI fold-containing family B member 2	BPIB2_HUMAN	2.11e-27	0	0	0	0	0	0	0	0	0	9	0	9	9	9	9	9	9	0	9	9	0	0	9	9	9	9	0	0	9	9	0	0	0	9	9	9	0	9	9	9	9	0	9	0	0
Q8N5I2	ARRDC1	Arrestin domain-containing protein 1	ARRD1_HUMAN	4.31e-14	5	5	5	5	5	5	5	5	5	5	5	5	5	5	5	5	5	5	5	0	0	0	0	0	5	5	5	5	5	5	5	5	5	5	5	5	5	5	5	5	5	5	5	5	5
Q8N6C8	LILRA3	Leukocyte immunoglobulin-like receptor subfamily A member 3	LIRA3_HUMAN	2.33e-27	0	0	2	2	2	2	2	2	0	2	2	2	2	2	2	2	2	2	2	0	0	0	2	0	2	2	2	2	2	2	2	2	0	2	2	2	2	2	2	2	0	0	2	0	0
Q8N6Q3	CD177	CD177 antigen	CD177_HUMAN	1.68e-22	9	9	9	9	9	9	9	9	9	9	9	9	9	9	9	9	9	9	9	9	0	9	9	9	9	9	9	9	9	9	9	9	9	9	9	9	9	9	9	9	9	9	9	9	9
Q8N8N7	PTGR2	Prostaglandin reductase 2	PTGR2_HUMAN	8.34e-16	5	5	0	5	5	5	0	0	0	5	5	5	5	5	5	5	5	5	5	0	0	5	5	5	5	5	5	5	5	5	5	0	0	5	5	5	5	5	5	5	5	5	5	0	0
Q8NBJ4	GOLM1	Golgi membrane protein 1	GOLM1_HUMAN	7.65e-26	26	26	26	26	26	26	26	26	26	26	26	26	26	26	26	26	26	26	26	26	26	26	26	26	26	26	26	26	26	26	26	26	26	26	26	26	26	26	26	26	26	26	26	26	26
Q8NBJ7	SUMF2	Inactive C-alpha-formylglycine-generating enzyme 2	SUMF2_HUMAN	1.9e-14	3	3	3	3	3	3	0	0	0	3	3	3	3	0	3	0	3	0	3	0	0	3	3	3	3	3	3	3	3	3	0	0	0	3	3	3	3	0	3	3	3	3	3	3	3
Q8NBS9	TXNDC5	Thioredoxin domain-containing protein 5	TXND5_HUMAN	6.01e-28	9	9	9	9	9	9	9	9	9	9	9	9	9	9	9	9	9	9	9	9	9	9	9	9	9	9	9	9	9	9	9	9	9	9	9	9	9	9	9	9	9	9	9	9	9
Q8NC42	RNF149	E3 ubiquitin-protein ligase RNF149	RN149_HUMAN	9.41e-19	6	6	6	6	6	6	6	6	6	6	6	6	6	6	6	6	6	6	6	6	6	6	6	6	6	6	6	6	6	6	6	6	6	6	6	6	6	6	6	6	6	6	6	6	6
Q8NC51	SERBP1	Plasminogen activator inhibitor 1 RNA-binding protein	PAIRB_HUMAN	4.1e-16	6	6	6	6	6	6	0	6	0	6	0	6	6	6	6	6	6	6	6	6	6	0	6	0	6	6	6	6	0	0	6	6	0	6	6	6	0	0	6	0	0	0	6	0	0
Q8NCC3	PLA2G15	Group XV phospholipase A2	PAG15_HUMAN	3.97e-25	10	10	10	10	10	10	0	10	0	10	10	10	10	10	10	10	10	10	10	0	10	10	10	10	10	10	10	10	10	10	10	10	0	10	10	10	10	10	10	10	10	10	10	10	10
Q8NCW5	NAXE	NAD(P)H-hydrate epimerase	NNRE_HUMAN	3.18e-18	3	3	3	3	3	3	0	0	0	3	3	3	3	3	3	3	3	3	3	0	0	3	3	3	3	3	3	3	3	3	3	0	0	3	3	3	3	3	3	3	3	0	3	3	0
Q8NDA2	HMCN2	Hemicentin-2	HMCN2_HUMAN	2.77e-27	14	14	14	14	14	14	14	14	14	14	14	14	14	14	14	14	14	14	14	14	14	14	14	14	14	14	14	14	14	14	14	14	14	14	14	14	14	14	14	14	14	14	14	14	14
Q8NDH3	NPEPL1	Probable aminopeptidase NPEPL1	PEPL1_HUMAN	6.49e-08	0	0	0	0	0	0	0	0	0	0	0	0	2	0	2	0	0	0	2	0	0	0	0	0	2	2	0	2	2	2	0	0	0	2	0	2	2	0	2	0	0	0	2	0	0
Q8NEB7	ACRBP	Acrosin-binding protein	ACRBP_HUMAN	2.58e-21	4	4	0	4	0	0	0	0	0	4	4	4	4	4	4	4	0	0	4	0	0	4	4	0	4	4	4	4	4	4	4	4	0	4	4	4	0	4	0	4	4	4	4	4	4
Q8NEX9	SDR9C7	Short-chain dehydrogenase/reductase family 9C member 7	DR9C7_HUMAN	4.38e-13	0	0	4	0	0	0	0	0	0	0	0	4	4	4	4	0	0	0	0	0	0	0	4	4	4	4	4	4	4	4	0	0	0	4	4	4	0	4	4	0	0	0	4	0	0
Q8NEY4	ATP6V1C2	V-type proton ATPase subunit C 2	VATC2_HUMAN	8.95e-08	0	2	0	2	2	0	0	0	0	2	0	2	2	2	2	2	2	2	2	0	0	0	0	0	2	2	2	2	2	2	2	0	0	2	2	2	2	2	2	2	2	2	2	2	2
Q8NFJ5	GPRC5A	Retinoic acid-induced protein 3	RAI3_HUMAN	1.12e-19	5	5	5	5	5	5	5	5	5	5	5	5	5	5	5	5	5	5	5	5	5	5	5	5	5	5	5	5	5	5	5	5	5	5	5	5	5	5	5	5	5	5	5	5	5
Q8NFT8	DNER	Delta and Notch-like epidermal growth factor-related receptor	DNER_HUMAN	1.55e-20	6	6	6	6	6	6	6	6	6	6	6	6	6	6	6	6	6	6	6	6	6	6	6	6	6	6	6	6	6	6	6	6	6	6	6	6	6	6	6	6	6	6	6	6	6
Q8NFU3	TSTD1	Thiosulfate:glutathione sulfurtransferase	TSTD1_HUMAN	1.38e-15	2	2	0	2	2	2	0	2	2	2	2	2	2	2	2	2	2	0	2	2	0	2	2	2	2	2	2	2	2	2	0	2	0	2	2	2	2	2	2	2	2	2	2	2	2
Q8NFW8	CMAS	N-acylneuraminate cytidylyltransferase	NEUA_HUMAN	3.51e-08	0	0	0	0	0	0	0	0	0	0	0	0	3	3	3	0	0	0	0	0	0	0	0	0	0	0	0	3	3	3	0	0	0	0	0	0	0	0	0	0	0	0	3	0	0
Q8NFZ8	CADM4	Cell adhesion molecule 4	CADM4_HUMAN	1.62e-18	12	12	12	12	12	12	12	12	12	12	12	12	12	12	12	12	12	12	12	12	12	12	12	12	12	12	12	12	12	12	12	12	12	12	12	12	12	12	12	12	12	12	12	12	12
Q8NHJ6	LILRB4	Leukocyte immunoglobulin-like receptor subfamily B member 4	LIRB4_HUMAN	1.69e-20	10	10	10	10	10	10	10	10	10	10	10	10	10	10	10	10	10	10	10	10	10	10	10	10	10	10	10	10	10	10	10	10	0	10	10	10	10	10	10	10	10	10	10	10	0
Q8NHL6	LILRB1	Leukocyte immunoglobulin-like receptor subfamily B member 1	LIRB1_HUMAN	2.28e-05	0	0	0	2	0	2	0	0	0	2	2	2	2	0	2	2	0	2	2	0	0	0	0	2	2	2	2	2	2	2	0	0	0	2	0	0	0	2	2	0	0	0	2	0	0
Q8NHP8	PLBD2	Putative phospholipase B-like 2	PLBL2_HUMAN	5.98e-29	14	14	14	14	14	14	14	14	14	14	14	14	14	14	14	14	14	14	14	0	0	14	14	14	14	14	14	14	14	14	14	14	14	14	14	14	14	14	14	14	14	14	14	14	14
Q8NI32	LYPD6B	Ly6/PLAUR domain-containing protein 6B	LPD6B_HUMAN	9.02e-12	2	2	2	2	2	2	2	2	2	2	2	2	0	0	2	2	2	2	2	2	2	0	2	2	2	2	2	2	2	2	0	0	0	2	2	2	2	2	2	2	2	0	2	2	0
Q8NI99	ANGPTL6	Angiopoietin-related protein 6	ANGL6_HUMAN	3.62e-08	0	0	0	0	0	0	0	0	0	3	3	3	3	3	3	3	3	3	0	0	0	0	3	3	0	3	0	0	3	3	0	0	0	3	3	3	3	3	3	0	0	0	0	0	0
Q8TAB3	PCDH19	Protocadherin-19	PCD19_HUMAN	1.05e-15	8	8	8	8	8	8	8	8	8	8	8	8	8	8	8	8	8	8	8	8	8	8	8	8	8	8	8	8	8	8	8	8	0	8	8	8	8	8	8	8	8	8	8	8	8
Q8TB96	ITFG1	T-cell immunomodulatory protein	TIP_HUMAN	5.98e-29	11	11	11	11	11	11	11	11	11	11	11	11	11	11	11	11	11	11	11	11	11	11	11	11	11	11	11	11	11	11	11	11	11	11	11	11	11	11	11	11	11	11	11	11	11
Q8TBP5	FAM174A	Membrane protein FAM174A	F174A_HUMAN	8.91e-17	2	2	2	2	2	2	2	2	2	2	2	2	2	2	2	2	2	2	2	2	2	2	2	2	2	2	2	2	2	2	2	2	2	2	2	2	2	2	2	2	2	2	2	2	2
Q8TCA0	LRRC20	Leucine-rich repeat-containing protein 20	LRC20_HUMAN	4.57e-12	0	0	0	7	7	0	0	0	0	7	0	7	7	7	7	0	7	0	7	0	0	0	0	0	7	7	7	7	7	7	0	0	0	7	7	7	0	0	0	0	0	0	7	0	0
Q8TCD5	NT5C	5'(3')-deoxyribonucleotidase, cytosolic type	NT5C_HUMAN	5.65e-14	6	6	6	6	6	6	0	0	0	6	6	6	6	6	6	6	6	6	6	0	0	6	6	6	6	6	6	6	6	6	0	6	0	6	6	6	6	6	6	0	0	0	6	0	0
Q8TCJ2	STT3B	Dolichyl-diphosphooligosaccharide--protein glycosyltransferase subunit STT3B	STT3B_HUMAN	1.33e-16	3	3	3	3	3	0	3	3	3	3	3	3	3	3	3	3	3	0	3	3	3	3	3	3	3	0	3	3	3	3	3	3	0	3	3	3	3	3	3	3	3	3	3	3	3
Q8TCT8	SPPL2A	Signal peptide peptidase-like 2A	SPP2A_HUMAN	1.05e-22	2	2	2	2	2	2	2	2	2	2	2	2	2	2	2	2	2	2	2	2	2	2	2	2	2	2	2	2	2	2	2	2	0	2	2	2	2	2	2	2	2	2	2	2	2
Q8TCZ2	CD99L2	CD99 antigen-like protein 2	C99L2_HUMAN	5.64e-25	5	5	5	5	5	5	5	5	5	5	5	5	5	5	5	5	5	5	5	5	5	5	5	5	5	5	5	5	5	5	5	5	5	5	5	5	5	5	5	5	5	5	5	5	5
Q8TD26	CHD6	Chromodomain-helicase-DNA-binding protein 6	CHD6_HUMAN	8.62e-12	2	2	0	2	2	2	2	2	0	2	2	0	2	2	2	2	2	0	0	2	2	2	2	2	2	2	2	2	2	2	2	2	0	2	2	2	2	2	0	2	2	2	2	2	0
Q8TDL5	BPIFB1	BPI fold-containing family B member 1	BPIB1_HUMAN	1.02e-24	11	11	11	11	11	11	0	0	0	11	0	11	11	11	11	11	11	11	11	11	11	11	11	11	11	11	11	11	11	11	11	11	0	11	11	11	11	11	11	0	0	0	11	0	0
Q8TDQ0	HAVCR2	Hepatitis A virus cellular receptor 2	HAVR2_HUMAN	1.21e-19	9	9	9	9	9	9	9	9	9	9	9	9	9	9	9	9	9	9	9	9	9	9	9	9	9	9	9	9	9	9	9	9	9	9	9	9	9	9	9	9	9	9	9	9	9
Q8TDQ1	CD300LF	CMRF35-like molecule 1	CLM1_HUMAN	2.87e-25	4	4	4	4	0	4	4	4	4	4	4	4	4	4	4	4	4	4	4	4	4	4	4	4	4	4	4	4	4	4	4	4	4	4	4	4	4	4	4	4	4	4	4	4	4
Q8TDY8	IGDCC4	Immunoglobulin superfamily DCC subclass member 4	IGDC4_HUMAN	3.2e-15	4	4	4	0	4	4	4	4	4	4	4	4	4	4	4	4	4	4	4	0	0	4	4	4	4	4	4	4	4	4	4	4	0	4	4	4	4	4	4	4	4	4	4	4	0
Q8TE68	EPS8L1	Epidermal growth factor receptor kinase substrate 8-like protein 1	ES8L1_HUMAN	3.23e-26	15	15	15	15	15	15	15	15	15	15	15	15	15	15	15	15	15	15	15	15	15	15	15	15	15	15	15	15	15	15	15	15	15	15	15	15	15	15	15	15	15	15	15	15	15
Q8TEB7	RNF128	E3 ubiquitin-protein ligase RNF128	RN128_HUMAN	2.32e-05	0	2	2	0	2	2	0	0	0	2	2	2	2	2	2	0	2	2	2	0	0	0	0	0	0	0	2	0	0	0	0	0	0	2	2	2	2	2	2	0	0	0	0	0	0
Q8TF66	LRRC15	Leucine-rich repeat-containing protein 15	LRC15_HUMAN	2.92e-23	12	12	12	12	12	12	12	0	0	12	12	12	12	12	12	12	12	12	12	0	0	12	12	12	12	12	12	12	12	12	12	12	0	12	12	12	12	12	12	12	12	0	12	12	12
Q8TF74	WIPF2	WAS/WASL-interacting protein family member 2	WIPF2_HUMAN	1.06e-11	3	3	3	3	3	3	3	3	3	3	3	3	3	3	3	3	3	3	3	3	0	3	0	0	3	3	3	3	3	3	3	3	0	3	3	3	3	3	0	3	0	0	3	3	3
Q8WU39	MZB1	Marginal zone B- and B1-cell-specific protein	MZB1_HUMAN	3.45e-16	3	3	3	0	0	3	3	3	3	3	3	3	3	3	3	3	3	3	3	3	3	3	3	3	3	3	3	3	3	3	3	3	0	3	3	3	3	3	3	3	3	3	3	3	3
Q8WUM4	PDCD6IP	Programmed cell death 6-interacting protein	PDC6I_HUMAN	2.7e-26	40	40	40	40	40	40	40	40	40	40	40	40	40	40	40	40	40	40	40	40	0	40	40	40	40	40	40	40	40	40	40	40	40	40	40	40	40	40	40	40	40	40	40	40	40
Q8WUT4	LRRN4	Leucine-rich repeat neuronal protein 4	LRRN4_HUMAN	3.08e-22	5	5	5	5	5	5	5	5	5	5	5	5	5	5	5	5	5	5	5	5	5	5	5	5	5	5	5	5	5	5	5	5	5	5	5	5	5	5	5	5	5	5	5	5	5
Q8WV92	MITD1	MIT domain-containing protein 1	MITD1_HUMAN	4.05e-21	4	4	4	4	4	4	4	4	4	4	4	4	4	4	4	4	4	4	4	0	0	4	4	4	4	4	4	4	4	4	4	4	0	4	4	4	4	4	4	4	4	4	4	4	4
Q8WVN6	SECTM1	Secreted and transmembrane protein 1	SCTM1_HUMAN	9.06e-26	4	4	4	4	4	4	4	4	4	4	4	4	4	4	4	4	4	4	4	4	4	4	4	4	4	4	4	4	4	4	4	4	4	4	4	4	4	4	4	4	4	4	4	4	4
Q8WVQ1	CANT1	Soluble calcium-activated nucleotidase 1	CANT1_HUMAN	1.35e-22	13	13	13	13	13	13	13	13	13	13	13	13	13	13	13	13	13	13	13	13	0	13	13	13	13	13	13	13	13	13	13	13	0	13	13	13	13	13	13	13	13	13	13	13	13
Q8WVV4	POF1B	Protein POF1B	POF1B_HUMAN	1.99e-21	12	12	12	0	12	0	12	12	0	12	12	12	12	12	12	12	12	12	12	12	0	12	12	12	12	12	12	12	12	12	12	12	0	12	12	12	0	12	12	12	12	12	12	0	12
Q8WVV5	BTN2A2	Butyrophilin subfamily 2 member A2	BT2A2_HUMAN	8.79e-15	10	10	10	10	10	10	10	10	10	10	10	10	10	10	10	10	10	10	10	10	10	10	10	10	10	10	10	10	10	10	10	10	10	10	10	10	10	10	10	10	10	10	10	10	10
Q8WW52	FAM151A	Protein FAM151A	F151A_HUMAN	8.85e-23	6	6	6	6	6	6	0	6	0	6	6	6	6	6	6	6	6	6	6	6	6	6	6	6	6	6	6	6	6	6	6	6	0	6	6	6	6	6	6	6	6	6	6	6	6
Q8WWA0	ITLN1	Intelectin-1	ITLN1_HUMAN	1.86e-21	12	12	12	12	12	12	12	12	12	12	12	12	12	12	12	12	12	12	12	12	12	12	12	12	12	12	12	12	12	12	12	12	12	12	12	12	12	12	12	12	12	12	12	12	12
Q8WWA1	TMEM40	Transmembrane protein 40	TMM40_HUMAN	1.42e-09	0	2	0	2	0	2	0	0	0	2	0	0	2	2	2	2	2	2	2	2	2	0	2	2	2	2	2	2	2	0	2	2	0	2	2	2	0	0	0	0	2	0	2	2	0
Q8WWG1	NRG4	Pro-neuregulin-4, membrane-bound isoform	NRG4_HUMAN	3.35e-05	0	2	2	0	2	0	2	2	2	0	0	2	2	2	2	2	2	0	2	2	2	2	2	2	2	2	2	2	0	0	2	2	0	2	2	2	0	2	2	0	0	0	2	0	0
Q8WWI1	LMO7	LIM domain only protein 7	LMO7_HUMAN	1.06e-17	7	7	7	0	7	0	0	0	0	0	0	7	7	7	7	7	7	7	7	0	0	0	0	7	7	7	7	7	7	7	7	7	0	7	7	7	7	7	7	0	0	0	7	0	0
Q8WWI5	SLC44A1	Choline transporter-like protein 1	CTL1_HUMAN	7.28e-08	2	2	2	0	2	0	0	0	0	2	2	2	2	2	2	2	2	2	2	0	0	2	2	0	2	2	2	2	2	2	2	2	0	2	2	2	2	2	2	2	0	0	2	2	0
Q8WWQ8	STAB2	Stabilin-2	STAB2_HUMAN	1e-10	3	3	3	3	3	3	3	3	3	3	3	3	3	3	3	0	3	0	3	3	3	0	3	3	3	3	3	3	3	3	3	0	0	3	3	3	3	3	3	3	0	3	3	3	0
Q8WWV6	FCAMR	High affinity immunoglobulin alpha and immunoglobulin mu Fc receptor	FCAMR_HUMAN	3.67e-11	2	2	2	2	2	2	2	2	2	2	2	2	2	2	2	2	2	2	2	2	2	2	2	2	2	2	2	2	2	2	2	2	2	2	2	2	2	2	2	2	2	2	2	2	2
Q8WWY7	WFDC12	WAP four-disulfide core domain protein 12	WFD12_HUMAN	1.07e-09	3	0	0	0	0	3	3	3	3	3	0	0	3	0	3	3	3	3	3	3	3	3	3	3	3	3	3	3	3	3	3	3	3	3	3	3	0	0	3	3	3	3	3	3	3
Q8WWZ8	OIT3	Oncoprotein-induced transcript 3 protein	OIT3_HUMAN	2.3e-16	6	6	6	6	6	6	6	6	6	6	6	6	6	6	6	6	6	6	6	0	0	6	6	6	6	6	6	6	6	6	6	6	0	6	6	6	6	6	6	6	6	6	6	6	6
Q8WXH0	SYNE2	Nesprin-2	SYNE2_HUMAN	3.85e-06	2	2	2	2	2	0	2	2	2	2	2	2	0	0	2	0	0	0	2	2	2	2	2	2	2	2	2	2	2	2	2	2	0	2	2	2	2	0	2	2	2	2	2	2	2
Q8WXI7	MUC16	Mucin-16	MUC16_HUMAN	1.21e-11	7	7	7	7	0	0	7	7	7	7	7	7	7	7	7	7	7	7	7	7	7	7	7	7	7	7	7	7	7	7	7	7	0	7	7	7	7	7	7	0	7	7	7	7	7
Q8WZ42	TTN	Titin	TITIN_HUMAN	7.52e-26	24	24	24	24	24	24	24	24	24	24	24	24	24	24	24	24	24	24	24	24	24	24	24	24	24	24	24	24	24	24	24	24	24	24	24	24	24	24	24	24	24	24	24	24	24
Q8WZ75	ROBO4	Roundabout homolog 4	ROBO4_HUMAN	1.82e-22	18	18	18	18	18	18	18	18	18	18	18	18	18	18	18	18	18	18	18	18	18	18	18	18	18	18	18	18	18	18	18	18	18	18	18	18	18	18	18	18	18	18	18	18	18
Q92484	SMPDL3A	Acid sphingomyelinase-like phosphodiesterase 3a	ASM3A_HUMAN	5.57e-21	6	6	6	6	6	6	6	6	6	6	6	6	6	6	6	6	6	6	6	0	0	6	6	6	6	6	6	6	6	6	6	6	6	6	6	6	6	6	6	6	6	6	6	6	6
Q92485	SMPDL3B	Acid sphingomyelinase-like phosphodiesterase 3b	ASM3B_HUMAN	5.16e-22	4	4	4	4	4	4	0	0	0	4	4	4	4	0	4	0	4	4	4	0	0	0	0	0	4	4	4	4	4	4	4	4	0	4	4	4	4	4	4	0	0	0	4	0	0
Q92496	CFHR4	Complement factor H-related protein 4	FHR4_HUMAN	1.03e-14	0	0	0	4	4	4	4	4	4	4	4	4	4	4	4	4	4	4	4	0	0	4	4	4	4	4	4	4	4	4	4	4	0	4	4	4	4	4	4	4	4	4	4	4	4
Q92520	FAM3C	Protein FAM3C	FAM3C_HUMAN	1.45e-26	12	12	12	12	12	12	12	12	12	12	12	12	12	12	12	12	12	12	12	12	12	12	12	12	12	12	12	12	12	12	12	12	12	12	12	12	12	12	12	12	12	12	12	12	12
Q92530	PSMF1	Proteasome inhibitor PI31 subunit	PSMF1_HUMAN	2.43e-12	3	3	0	3	0	3	0	0	0	3	3	3	3	3	3	0	3	3	3	0	0	0	3	3	3	0	3	3	3	3	0	0	0	3	3	3	3	3	3	0	0	0	0	0	0
Q92542	NCSTN	Nicastrin	NICA_HUMAN	2.22e-21	5	5	5	5	5	5	5	5	5	5	5	5	5	5	5	5	5	5	5	5	5	5	5	5	5	5	5	5	5	5	5	5	5	5	5	5	5	5	5	5	5	5	5	5	5
Q92563	SPOCK2	Testican-2	TICN2_HUMAN	3.58e-15	9	9	9	9	9	9	9	9	9	9	9	9	9	9	9	9	9	9	9	9	9	9	9	9	9	9	9	9	9	9	9	9	9	9	9	9	9	9	9	9	9	9	9	9	9
[truncated: 492 more rows]
[truncated: 77 more columns]

## Sheet: MIX after filing miss value
PG.ProteinAccessions	X.56..mix.raw.PG.Quantity	X.57..mix_220704032437.raw.PG.Quantity	X.58..mix_220705014207.raw.PG.Quantity	X.59..mix_220705222201.raw.PG.Quantity	X.60..mix_220707153356.raw.PG.Quantity	X.61..mix_220708232548.raw.PG.Quantity	mean	stdevp	cv
A0A075B6H9	8453.95	8147.56	13798.1	11519.7	1576.52	9887.76	8897.27	3790.97	0.426082
A0A075B6I0	54316.9	76161.3	119517	60968.3	76942.6	74800.8	77117.9	20755.4	0.269138
A0A075B6J9	73433	86008	67275.2	78849.6	60485.4	67005.9	72176.2	8414.88	0.116588
A0A075B6K4	31341.9	46552.2	36432.2	41491.3	26138.3	28971.6	35154.6	7138.53	0.203061
A0A075B6K5	9893.44	11064.8	16209.3	11182.6	16507.4	13465.4	13053.8	2565.77	0.196553
A0A075B6P5;P01615	14254.8	13599.8	14291.2	13815.2	17665.8	12165.7	14298.8	1663.91	0.116368
A0A075B6Q5	14132.9	8816.5	14047.8	9204	10860.8	9077.02	11023.2	2266.11	0.205577
A0A087WSX0	26031.6	12177.2	13044.9	10861.1	23942.3	13254.6	16552	6043.95	0.36515
A0A0A0MRZ8;P04433	674569	747704	700681	641030	621077	619351	667402	46111.5	0.069091
A0A0A0MS15	33141.6	28179.7	32144.1	26077.5	36167.3	37469.9	32196.7	4042.45	0.125555
A0A0B4J1U7	30229.6	32076.1	29199.3	29835	30356.2	34082.5	30963.1	1646.18	0.0531658
A0A0B4J1V0	9357.77	10687.6	6300.13	10142.9	7445.99	7842.57	8629.49	1554.7	0.180161
A0A0B4J1V2	28866.1	1789.71	21430.3	1348.11	20579.2	18486.5	15416.7	10301.7	0.668216
A0A0B4J1V6	77892.6	74697.5	79933.5	74635.8	59799	63559.4	71752.9	7434.47	0.103612
A0A0B4J1X5	191658	102546	191409	90722.3	159349	181736	152903	41351.8	0.270444
A0A0B4J1Y8	14539.4	16475.6	27901.2	15343.3	17249.1	16794.9	18050.6	4497.99	0.249188
A0A0B4J1Y9	70892.2	25224.1	53812.4	60496.2	19081	16724.2	41038.4	21433.7	0.522286
A0A0C4DH29	67528.9	145418	53465.1	91428.1	62641.2	68590.2	81511.9	30788.3	0.377715
A0A0C4DH38	4710.12	5983.35	5309.29	6595.98	5999.44	6583.69	5863.65	673.977	0.114942
A0A0C4DH41;P01824;P01825;P06331;P0DP06;P0DP08	45748.6	51871.7	51833.2	49631	56741.1	54693.2	51753.1	3514.32	0.0679056
A0A0C4DH43	14505.9	31969.7	30349.5	16781.9	16135.1	35647.7	24231.6	8595.3	0.354714
A0A0C4DH68	42088.8	31016.8	40426.4	34409.7	34644	38508.9	36849.1	3826.12	0.103832
A0A0J9YX35	25754.8	14289.6	13885	10878.1	31306	28401.4	20752.5	7972.24	0.384159
A0A0J9YXX1	57977.6	23977.2	66539.5	22085.9	19154.1	20803.9	35089.7	19423.2	0.553529
A0AVT1	440.03	107.09	369.269	1	103.264	609.435	271.681	216.281	0.796084
A0M8Q6	304311	357549	491112	296239	300719	570131	386677	106272	0.274834
A1A5D9	186245	147543	32013.1	2662.6	81342.5	200917	108454	75165.2	0.693062
A1E959	4653.89	6635.98	7410.66	9450.19	6725.74	6197.78	6845.71	1436.71	0.20987
A1L4H1	5199.65	2997.62	12132.1	5852.97	9091.08	10409.8	7613.86	3179.42	0.417583
A2NJV5	1.09651e+06	1.12092e+06	1.01482e+06	956617	1.13458e+06	1.01571e+06	1.05652e+06	64838.9	0.06137
A6ND91	1854.42	1601.7	1212.75	2275.66	2081.66	3032.57	2009.79	569.777	0.2835
A6NGN9	9929.93	10603.3	12218.6	8436.14	8547.66	6937.03	9445.46	1702.09	0.180202
A6NI73	30607.9	27284.1	34842	28758.4	34842.4	30664.9	31166.6	2841.86	0.0911828
A6NL88	4969.62	7605.12	6762.83	5987.36	9581.14	5045.16	6658.54	1599.71	0.240249
A8K2U0	158058	147442	160023	152546	156878	147262	153702	5016.93	0.0326407
A8MVW5	4968.52	12564.4	16823.4	33863.4	11990.1	11955	15360.8	8974.65	0.584257
B3EWG3;B3EWG5;B3EWG6	3972.54	5031.45	5985.7	3487.67	4186.29	3330.64	4332.38	921.051	0.212597
E9PAV3	3054.71	3356.62	3083.25	5327.1	3283.56	2645.3	3458.42	865.812	0.250349
iRT_Peptides_Fusion;iRT-Kit_WR_fusion	11999365	9828276	12377770	11925030	11794203	11448095	1.15621e+07	822724	0.0711568
O00115	29697.5	32686.6	33991.5	27896.6	31384.5	28936.9	30765.6	2128.99	0.0692004
O00144	3351.69	1915.09	3675.44	3158.83	2515.29	2624.82	2873.53	586.216	0.204006
O00151	1473.52	2113.06	3255.7	730.866	1687.45	2924.09	2030.78	858.622	0.422804
O00159	8048.68	15587	10084.4	8798.02	6744.36	6663.15	9320.94	3039.78	0.326124
O00182	53601.1	51699.4	57676.9	47932.7	57093.3	50918.3	53153.6	3429.07	0.0645125
O00187	1.00007e+06	1.02813e+06	959337	911435	888537	960871	958064	47770	0.049861
O00204	7054.57	6935.52	6241.02	5761.68	7919.34	7425.22	6889.56	715.243	0.103816
O00231	491.425	600.962	796.018	468.532	861.297	914.557	688.798	176.733	0.256582
O00233	5150.23	5230.9	3799.12	4622.8	5475.25	5314.25	4932.09	571.143	0.115801
O00241	53856.5	56370.9	64569.6	50794.6	64928.3	53703.3	57370.5	5461.78	0.0952019
O00244	53975.2	79781.4	36025.8	10797.4	33665	61446.3	45948.5	22114.2	0.481281
O00264	22886.6	7818.58	9181.59	5805.77	33781.1	10788.3	15043.7	10021.8	0.66618
O00299	18780.1	20986.3	17334.4	18312.7	22529.2	21461.2	19900.6	1865.75	0.0937535
O00322	14976.8	13026.2	12951.8	12092.2	16017.5	14186.4	13875.1	1332.44	0.0960307
O00391	197943	186145	190265	180114	230542	228972	202330	20108.1	0.0993827
O00401	7375.69	5714.45	6705.37	5114.04	5782.6	6277.4	6161.59	733.039	0.118969
O00429	15479.9	11916.7	13536.2	10026.8	12765.9	11116.9	12473.7	1750.72	0.140353
O00461	5554.46	2165.31	3833.09	3055.45	6346.51	4369.47	4220.72	1417.32	0.335801
O00462	22939.3	19641.6	25128.4	17688.8	21056.5	18754.1	20868.1	2534.97	0.121476
O00468	87768.7	87023.6	88237	86784.4	84731.8	100316	89143.7	5116.49	0.057396
O00499	19820.8	15926.2	19792	15179.1	28714.1	22927.7	20393.3	4536.7	0.22246
O00515	5686.23	3604.57	2082.09	1789.58	2026.89	1519.57	2784.82	1457.73	0.523454
O00526	18029.7	19933.1	24730.3	17812.9	18924.3	15446.6	19146.1	2844.94	0.148591
O00533	55330	44952.3	50956.5	51657	56054.7	60034.6	53164.2	4740.42	0.0891658
O00560	48402.3	38025.2	52199.8	53093.2	53137.5	49474.4	49055.4	5246	0.10694
O00571	569.143	841.337	505.899	506.158	713.385	546.034	613.659	123.495	0.201244
O00584	27694.7	26008.8	26710.9	23151.1	19697.9	21441.4	24117.5	2907.68	0.120563
O00592	100869	116006	101740	100919	88616.3	111312	103244	8710.51	0.0843685
O00622	4235.67	2535.28	5250.18	4804.55	2951.07	4610.96	4064.62	988.236	0.243131
O00748	216.949	259.377	518.7	307.66	692.296	491.213	414.366	167.54	0.404328
O00754	3606.01	3750.97	2992.34	3246.44	3151.76	3104.53	3308.68	275.155	0.0831616
O00764	2182.07	2836.65	4500.46	880.413	3350.91	1770.81	2586.89	1158.29	0.447754
O14498	140785	139836	149865	137013	144528	145238	142878	4186.21	0.0292993
O14556	25309.9	31560.5	29933.6	31563.5	31992.3	27454.9	29635.8	2467.52	0.0832615
O14561	1133.28	633.48	1740.77	1334.98	606.342	218.401	944.542	509.977	0.53992
O14594	45227.7	34714.3	31627.2	29061.4	28138.5	36220.7	34165	5711.37	0.16717
O14618	54322.5	1950.78	3413.38	3342.27	2397.51	1468.24	11149.1	19320.3	1.7329
O14639	791.428	821.556	99.6931	391.199	1242.22	470.733	636.138	365.367	0.574352
O14732	6809.08	7015.88	6035.26	7859.21	7636.12	7623.17	7163.12	624.368	0.0871642
O14737	1788.34	1300.65	1010.86	655.832	1806.26	934.618	1249.43	430.406	0.344482
O14744	1633.57	2089.57	1140.4	2118.34	1995.04	1243.09	1703.33	395.831	0.232386
O14745	12723.9	14751.4	18616.4	14376.3	19533.1	17360.8	16227	2442.63	0.150529
O14773	42680.4	51493.5	44647.1	49462.7	45221.3	42605.2	46018.4	3345.36	0.0726962
O14786	4465.87	9537.97	2910.64	9539.94	39899.6	3791.36	11690.9	12888.6	1.10244
O14791	3286.4	3342.38	4472.88	3596.04	1746.89	2514.15	3159.79	854.109	0.270306
O14798	27246.7	39712	52780.4	41684.2	29767.6	28435.8	36604.4	9111.9	0.248929
O14818	14511.5	13498	12879.3	14269.9	14489.6	14322.2	13995.1	603.579	0.0431279
O14907	5666.61	4939.09	6935.01	4069.58	8740.4	4937.41	5881.35	1548.76	0.263334
O14908	1167.43	1330.73	2311.38	477.1	975.08	414.872	1112.77	632.094	0.568039
O14917	3028.24	1958.37	2092.61	1103.56	2672.38	3046.75	2316.98	685.092	0.295683
O14950;P19105	21810.3	21292.1	23250.3	21577.6	24148.9	19053.4	21855.4	1604.88	0.0734317
O14966	8670.32	15826.7	9844.4	8975.47	8748.2	23507.6	12595.4	5483.25	0.435336
O14980	1254.09	982.088	1205.65	1280.9	735.151	1991.88	1241.63	385.087	0.310147
O15020	6166.12	5308.71	2111.43	1355.83	2709.76	1437.21	3181.51	1878.66	0.590494
O15031	150276	189848	165977	160166	128786	21197.4	136042	54494.2	0.40057
O15143	1765.44	17087.8	4066.89	1229.46	1785.2	4091.86	5004.44	5520.03	1.10303
O15144	5996.05	7740.12	7563.89	8397.3	8856.12	8672.27	7870.96	958.851	0.121821
O15145	83920.8	138276	113830	121932	53678.8	95089.9	101121	27562.2	0.272567
O15162	7859.83	5992.58	7841.48	5298.39	7016.01	5934.19	6657.08	982.208	0.147543
O15173	2664.62	1714.97	2012.05	1547.08	2301.15	2749.1	2164.83	450.384	0.208046
O15197	24955	23072	25688.2	21506.3	31075	27930.8	25704.5	3133.57	0.121907
O15204	21674.5	18145.7	12508.2	18305.8	7675.74	8975.37	14547.6	5168.73	0.355299
O15230	30279.8	38961	26898.9	31325.3	31283.9	35088.2	32306.2	3816.17	0.118125
O15231	30881.1	41958.6	45953.8	30278.5	29519	33546.2	35356.2	6312.15	0.17853
O15240	65891.8	79376.1	68027.4	58869.7	93258.6	84639.9	75010.6	11812.6	0.157479
O15244	3302.56	2146.84	2611.25	2397.79	2922.55	1630.1	2501.85	536.485	0.214435
O15263	7806.81	9335.64	8721.1	9601.01	5123.83	7194.1	7963.75	1517.59	0.190562
O15273	4578.77	2374.73	4521.74	6933.83	7912.79	3953.62	5045.91	1853.13	0.367254
O15382	1583.14	2695.39	4566.81	1827.31	1127.67	2610.81	2401.85	1113.61	0.463647
O15393	11366.2	15095	11301.2	16514.9	12044.7	13089.3	13235.2	1953.08	0.147567
O15394	3535.73	2244.9	3157.81	2393.89	6374.49	5505.16	3868.66	1548.39	0.400238
O15400	10848	5506.32	6533.96	4237.75	7496.27	7262.66	6980.83	2049.33	0.293565
O15484	1919.79	1809.64	988.454	2556.64	2210.34	2008.4	1915.54	479.107	0.250115
O15498	402.895	311.213	374.62	263.376	565.734	722.139	439.996	157.504	0.357967
O15511	10767.9	9102.23	11130.6	9982.43	10703.8	10633.2	10386.7	667.498	0.0642648
O43155	11580.3	9741.99	10865.5	9694.86	12117.3	11155.5	10859.2	893.917	0.0823185
O43157	3107.65	2212.91	1943.9	1762.06	1969.82	2162.98	2193.22	435.019	0.198347
O43175	9286.43	7081.94	8953.62	8411.61	11139	10885	9292.93	1397.79	0.150415
O43240	9486.72	9798.51	9775.46	10949.7	13308.5	9768.84	10514.6	1333.35	0.126809
O43242	1150.2	1280.87	1442.07	520.187	1714.53	1109.55	1202.9	365.749	0.304056
O43278	75129.8	72976	72128.2	67353	77907.4	84281.9	74962.7	5250.94	0.0700474
O43291	65257.7	81171.1	62291.6	74715.8	78565.3	72184.8	72364.4	6752.01	0.0933057
O43396	7669.41	10697.5	8515.06	7318.06	7947.76	7915.52	8343.88	1111.78	0.133245
O43399	6880.33	6519.16	7842.46	6885.04	5822.33	7354.58	6883.98	632.504	0.0918805
O43405	58832.2	86187.4	48492	72326.1	61658.9	23034.1	58421.8	19688.4	0.337004
O43451	289756	304854	317120	317686	344831	381475	325953	29835.1	0.0915319
O43488	1533.15	1734.43	6489.8	1957.95	2563.06	2320.24	2766.44	1700.17	0.614572
O43490	18077.4	11790.9	16053.1	15004	18784.8	15606.6	15886.1	2267.86	0.142757
O43491	6137.99	6613.24	6166.81	5366.06	5960.9	5183.46	5904.74	489.665	0.0829275
O43493	15574.1	29457.9	27626.3	24643.2	19088.3	26128.1	23753	4875.72	0.205268
O43505	40115.7	40226.9	39846.2	39749.5	45099.2	43192.3	41371.7	2043.51	0.0493939
O43511	2518.52	2388.08	2620.71	2316.84	3230.78	2599.52	2612.41	296.963	0.113674
O43567	19990.3	22558.2	20701.2	18646.5	22174.4	16538.2	20101.5	2062.28	0.102593
O43570	8143.13	3428.33	3909.24	3550.46	5877.6	4366.4	4879.19	1669.55	0.342178
O43586	10070.2	9949.78	10598.8	8770.65	13285.1	12133.2	10801.3	1492.61	0.138188
O43598	7373.43	6953.45	6617.18	6969.07	9272.64	8802.93	7664.79	1004.4	0.131041
O43617	682.761	782.744	364.416	1490.06	1173.13	1008.33	916.907	360.69	0.393377
O43633	27179.1	32398.4	41538	25668.3	24089.7	24596.1	29244.9	6141.54	0.210004
O43653	93355.1	147438	154474	91249.4	126389	126137	123174	24138.2	0.195969
O43681	4620.87	4113.78	4597.27	4002.57	5814.06	3720.29	4478.14	677.312	0.151249
O43707	34055.2	34034.3	36023.2	33154	45034.8	42412.1	37452.3	4579.55	0.122277
O43747	524.42	1626.34	4345.93	1288.52	782.86	551.865	1519.99	1324.3	0.871257
O43768	10957.6	17830.9	16822.4	15413.4	15271.4	17443	15623.1	2293.45	0.146798
O43776	1389.93	1249.15	1312.08	863.76	2140.98	3464.76	1736.78	861.192	0.495856
O43790;Q14533	17046.5	14608.1	19882	19053.8	20380.4	26324.5	19549.2	3596.97	0.183996
O43852	16378.5	9280.39	15812.7	8148.07	12997	11661.9	12379.8	3060.08	0.247184
O43866	89959.9	74053.2	96513.8	95765.6	67044	68604.6	81990.2	12448.4	0.151828
O43895	12826.9	13696.2	15648.4	11436.2	15896.3	17099.1	14433.9	1950.63	0.135143
O60218	28691	14690.4	16885.8	17983.1	16290.2	21170.9	19285.2	4646.86	0.240954
O60234	4552.16	4517.74	3057.67	5687	3307.13	3250.59	4062.05	942.114	0.231931
O60235	51282.2	36009.2	50546	29506.4	37865.3	36376.2	40264.2	7977.22	0.198122
O60259	4868.71	5536.23	5074.15	4324.21	5822.13	4625.27	5041.78	511.993	0.10155
O60271	1054.88	1221.36	1045.57	914.077	1242.6	852.681	1055.19	143.615	0.136103
O60279	41015.3	61731.5	33470.4	53026.1	50912.3	43319.8	47245.9	9134.96	0.193349
O60437	36568.8	561018	35624.1	626153	32261.4	35228.4	221142	264031	1.19394
O60449	8379.96	12116.3	738.213	4329.97	6137.15	47292.4	13165.7	15655.4	1.18911
O60487	5375.53	1602.77	3145	1881.45	4154.55	6001.09	3693.4	1649.36	0.446569
O60493	1010.16	1547.5	1600	2772.9	1814.29	2721.25	1911.02	638.891	0.33432
O60494	156089	168533	165295	151303	169780	160292	161882	6661.86	0.0411525
O60506	3158.48	1895.64	4146.39	3401.68	5145.57	5027.14	3795.81	1127.91	0.297147
O60568	6655.02	5921.11	5188.23	5516.21	6211.38	3907.63	5566.6	877.873	0.157704
O60603	1009.72	1354.54	871.815	1711.18	1889.38	1774.42	1435.18	387.829	0.270231
O60613	1005.38	2428.62	5255.58	1992.73	3690.36	3417.31	2965	1357.12	0.457713
O60635	15030.6	16095.6	16024.1	13768.4	15744.8	16990.2	15608.9	1004.78	0.064372
O60664	3954.65	2006.34	4977.45	3307.65	4128.86	3232.77	3601.28	918.595	0.255074
O60701	5938.08	3605.3	5233.69	3761.94	6408.05	3919.99	4811.17	1106.62	0.230011
O60704	2345.69	2124.18	2422.03	2229.9	2824.31	2510.6	2409.45	223.674	0.092832
O60716	1321.94	826.93	1593.41	1769.55	1144.03	244.58	1150.07	505.671	0.439685
O60763	572.039	846.903	438.225	348.357	692.841	789.968	614.722	180.113	0.293
O60784	5895.12	9008.09	7685.79	13455.4	13616.3	12005.5	10277.7	2937.3	0.285794
O60814;P57053;P58876;P62807;Q5QNW6;Q93079;Q99877;Q99879;Q99880	32684.3	35772.8	20765.8	21156.7	24825.2	23681.4	26481	5721.46	0.216059
O60869	80396.1	2299.09	306001	2206.85	4817.51	5667.21	66897.9	110539	1.65236
O60888	54001.1	41801.6	54235.4	67041.8	67546	90853.5	62579.9	15378.2	0.245737
O60911	3932.93	3459.68	5697.85	3366.69	6270.88	3912.03	4440.01	1124.22	0.253202
O60925	2196.31	2047.95	2055.89	2120.38	2495.33	1535.8	2075.28	284.395	0.137039
O60939	1459.04	4658.71	4036.36	3314.15	3965.39	3785.25	3536.48	1009.98	0.285588
O75015	10734.5	14316.1	12954.7	15260.7	14104.1	13221.8	13432	1421.62	0.105838
O75071	32849.7	39044.2	37711.7	34100.7	34845.1	39340	36315.2	2504.04	0.0689529
O75074	8753.08	8502.77	7484.2	6102.42	7765.22	9384.2	7998.65	1053.4	0.131697
O75083	4962.92	4748.72	4853.27	4961.24	4903.7	4167.45	4766.22	277.499	0.0582221
O75084;Q14332	36375.8	43218.5	38103.2	41248.7	51114.1	39612.4	41612.1	4773.72	0.114719
O75094	15165.8	19134.3	15961.7	13680.4	16652.9	12216.5	15468.6	2196.54	0.142
O75095	58161.3	139112	60358.1	78828.2	2630.83	38394.5	62914.1	41480.4	0.659317
O75131	15660.4	17303.8	14930.4	15180.1	16631.2	17110.6	16136.1	926.675	0.0574287
O75144	329915	323629	319432	281769	384792	355199	332456	31831.6	0.0957469
O75223	91976.9	91714.4	83582.2	79382.8	101380	99447.8	91247.3	7854.76	0.0860821
O75264	29598.9	7172.96	12677	13161	6776.21	3126.38	12085.4	8571.42	0.709236
O75309	11080.6	9589.79	11558.8	9711.92	13389.2	11067.9	11066.4	1268.39	0.114617
O75339	31255.3	35635.4	34303.8	33615.9	34593.7	34044.8	33908.1	1338.64	0.0394784
O75340	24637.8	18436.4	22059.9	22006.3	21590.1	21528.9	21709.9	1804.92	0.083138
O75342	796.547	1799.99	3409.36	3620.98	2589.57	1910.69	2354.52	974.989	0.414092
O75347	7989	10411.7	8554.55	10913.9	9190.88	9086.8	9357.81	1012.62	0.108211
O75348	4199.63	5446.29	1949.49	4705.77	3669	7999.17	4661.56	1839.89	0.394695
O75351	35608.4	40112	39476.6	37987.1	41062.9	41255.8	39250.5	1956.2	0.0498389
O75363	4398.22	5462.25	3936.6	4840.49	4754.65	5612.15	4834.06	577.607	0.119487
O75367	12783.1	12544.2	11313.6	11953.1	11715.1	12473	12130.3	514.087	0.0423802
O75368	23988	19922.8	19466.2	20288	24412.9	23012.3	21848.4	2013.59	0.0921623
O75369	38515.5	37329.2	42413.7	39100.9	40632.2	38149.4	39356.8	1698.72	0.043162
O75390	2547.7	1552.87	2286.85	1789.48	2555.73	2784.36	2252.83	441.024	0.195764
O75396	1524.04	245.422	952.792	1546.48	1053.38	1061.08	1063.87	433.394	0.407376
O75436	950.471	820.074	514.202	546.32	563.624	363.71	626.4	197.687	0.315591
O75487	4347.17	4859.63	5054.65	4042.67	7095.21	4850.96	5041.71	980.393	0.194456
O75503	31640.7	26966.6	33279.2	25733.3	40345.9	36368.4	32389	5069.55	0.156521
O75531	13198.1	8442.3	20671.8	11713.7	14368.3	13306.6	13616.8	3674.38	0.269841
O75594	829397	726994	851308	828170	980349	759170	829231	80297.6	0.0968338
O75608	9214.88	8389.69	9482.81	7664.22	9407.09	9301.68	8910.06	663.861	0.0745069
O75629	4582.63	6135.53	9090.87	8309.81	25019.8	11251.3	10731.7	6731.93	0.627296
O75635	3800.07	3220.62	3329.91	3744.32	3492.37	4784.4	3728.62	515.244	0.138186
O75674	2656.43	2979.71	3751.46	3635.4	3346.19	2304.58	3112.29	518.761	0.166681
O75752	1104.27	797.375	783.499	1103.13	644.977	862.072	882.553	169.184	0.191698
O75787	13060.1	11241.4	11206.6	10191.8	12431.2	13615.1	11957.7	1181.96	0.0988452
O75841	4941.06	3692.52	2148.4	621.192	340.737	527.21	2045.19	1748.7	0.855029
O75874	26909.2	28223.2	27276.6	26444.1	29568.5	27103.9	27587.6	1034.91	0.0375137
O75882	102901	161462	107830	143674	119808	105134	123468	21866.7	0.177103
O75891	13143.3	12156.3	13009	12278.3	17021.8	15271.4	13813.3	1761.54	0.127525
O75936	12554.3	14739.8	14210.6	12291.7	15239.2	14174	13868.3	1084.89	0.0782279
O75952	3089.35	1711.58	417.546	1447.57	955.883	1715.89	1556.3	823.498	0.529138
O75955	1734.66	3318.19	2265.02	2187.3	3256.89	2196.07	2493.02	587.814	0.235784
O75976	4391.55	4653.74	5177.17	5333.92	4293.06	4498.07	4724.59	393.609	0.0833109
O76003	33467.2	62425.7	79149	31569.4	47553.7	49880.6	50674.3	16433.5	0.324296
O76070	1042.92	803.391	925.676	2038.94	930.221	574.062	1052.53	464.606	0.441416
O76076	145128	149234	153517	136997	143860	130632	143228	7565.34	0.0528203
O94760	32049.6	26918.7	36202.4	33861.9	31850.9	33752.5	32439.3	2854.37	0.0879911
O94772	26784.4	34535.2	28755.5	28401.4	37399.9	38658	32422.4	4646.21	0.143303
O94832	94617.5	1642.59	57296.8	1989.36	58554.8	67518.6	46936.6	34183.8	0.728298
O94856	4001.28	3169.01	2348.79	2154.21	5369.21	4672.25	3619.12	1174.75	0.324595
O94905	1529.77	1992.88	1266.81	905.573	537.103	272.782	1084.15	584.124	0.538784
O94910	45484.3	42198.1	48528.7	45730.7	51224.4	45335.7	46417	2824.87	0.0608586
O94919	50392.8	50174.7	56310.5	54426.7	49057.6	52823.4	52197.6	2565.34	0.0491466
O94985	3122.89	9495.3	7133.45	6997.65	12835.4	10090.4	8279.18	3029.34	0.365898
O94991	5073.84	2637.29	3696.6	3734.8	4832.42	6269.04	4374	1167.24	0.266859
O95084	11497.4	11575.4	16835.2	8517.1	8079.67	1238.53	9623.89	4712.5	0.489667
O95154	7947.6	8423.81	10040.6	5972.94	9666.35	6156.09	8034.56	1561.24	0.194315
O95171	31261.7	32357.8	30150.6	26150.7	22810	22635.1	27561	3920.79	0.142259
O95185	4378.78	4034.27	3886.55	2931.76	4706.78	4456.03	4065.7	574.496	0.141303
O95274	88139.1	149733	82016.6	118434	97315	107046	107114	22473.9	0.209814
O95297	8679.6	5698.05	9671.2	5296.18	6817.26	5790.23	6992.09	1635.6	0.233921
O95336	87000.1	77599.4	89769.3	80485.9	114856	101750	91910	12827.9	0.13957
O95361	13769.8	35035.2	23215.6	7827	21293	33309.7	22408.4	9724.64	0.433973
O95372	90178.4	111799	99760	136256	87945	153586	113254	24197.1	0.213653
O95388	20391.9	19917.1	16676.4	14911.1	11844.7	11512.3	15875.6	3502.11	0.220597
O95428	7791.7	18233.6	14980.5	16009.4	6835.36	10814.9	12444.3	4250.9	0.341596
O95445	18091	24139.2	25065.3	22828.5	26240.3	25811.6	23696	2744.38	0.115816
O95450	6616.72	9275.15	7219	7809.53	7463.91	7495.15	7646.58	814.301	0.106492
O95460	15210	18409.8	16232.9	17725.2	19219.4	12492.8	16548.3	2248.08	0.135849
O95490	6277.29	5399.77	5483.08	8093.39	9312.72	8374.38	7156.77	1509.4	0.210905
O95497	19989.5	17869.5	18848.2	17958.5	18487.3	19049.1	18700.3	717.818	0.0383853
O95502	9406.37	6364.74	9209.12	8786.12	8558.44	7570.45	8315.87	1051.16	0.126404
O95571	1901.31	2839.45	4095.31	6852.2	3292.69	625.35	3267.72	1939.36	0.59349
O95633	13476.8	13765.6	8817.15	8152.62	14466.1	13511.3	12031.6	2536.11	0.210787
O95747	3892.39	5839.34	5609.59	5774.89	8644.92	8077.23	6306.39	1603.03	0.254191
O95777	625.808	774.553	785.931	660.229	1222.67	836.076	817.544	195.289	0.238872
O95782	1978.85	2262.21	2288.08	6145.85	2705.46	2011.49	2898.66	1471.54	0.507662
O95817	3221.54	2212.26	2702.94	2401.59	3661.1	3534.91	2955.72	551.871	0.186713
O95831	664.414	1640.99	508.115	895.606	485.767	512.189	784.513	408.273	0.520416
O95833	6443.79	6869.48	10994.7	6504.89	8334.1	10448.3	8265.88	1852.27	0.224086
O95834	2583.59	1941.03	1868.84	1617.86	2360.31	2485.05	2142.78	353.57	0.165005
O95857	3139.99	9575.75	4142.93	7580.61	9506.52	9876.67	7303.75	2709.2	0.370933
O95861	1192.67	1854.14	1892.19	1514.5	1632.1	1596.61	1613.7	232.057	0.143804
O95865	48231.7	58540.4	44059.4	46121	44645.5	35042.3	46106.7	6926.52	0.150228
O95867	2953.94	4126.31	5698.85	9604.76	5024.12	2328.09	4956.01	2372.41	0.478693
O95881	1222.91	2831.13	4135.52	3191.7	966.435	1973.3	2386.83	1114.03	0.466739
O95954	72076.6	6365	15246.5	156916	65984.6	94495.3	68514.1	50347.2	0.734844
O95967	69208.8	78478.8	66675	71125	56796	56478.9	66460.4	7819.1	0.117651
O95969	2033.14	2517.6	1796.92	3776.68	2396.66	2060.36	2430.23	647.722	0.266528
O95971	10714	16782.3	11784.7	16853	8937.88	9918.7	12498.4	3171.23	0.25373
O95980	7140.76	5930.61	6875.42	8441.89	6358.85	6576.86	6887.4	792.886	0.115121
O95998	338648	781927	397367	674349	418366	422585	505540	162748	0.321929
O96009	80685	71523.1	81546.4	77849.8	81577.5	82004.5	79197.7	3696.55	0.0466749
O96033	12872.5	20028.6	23187.3	18542.9	15915.7	18651.8	18199.8	3218.15	0.176823
P00167	2155.24	2102.37	1480.44	1615.45	2793.01	2411.79	2093.05	447.005	0.213566
P00326	1721.19	1671.64	851.51	1627.92	2550.78	953.003	1562.67	562.001	0.359641
P00338	55277	75533.6	46350.6	61174.6	65557.5	49798	58948.5	9828.69	0.166733
P00352	19741.9	22902.1	19382.2	22739.1	24025	25475.7	22377.7	2184.71	0.0976288
P00367	1195.48	720.282	1141.33	1244.75	656.237	1464.46	1070.42	288.809	0.269809
P00387	1871.03	852.248	1699.16	925.823	1547.83	1817.27	1452.23	411.47	0.283337
P00390	23733.6	23025.8	26610.8	20755.7	28785.4	29264	25362.6	3104.62	0.12241
P00403	16958.3	14592.9	15101.9	8397.42	12150.2	8343.74	12590.8	3296.61	0.261827
P00439	1099.34	806.767	1018.27	838.236	1035.61	598.76	899.499	170.962	0.190063
P00441	93828.5	86409.7	107479	95394.4	92976	147281	103895	20387	0.196227
P00450	150727	161270	158990	139049	121482	121047	142094	16354.5	0.115096
P00491	17275.5	13344.7	18767.7	14584.5	20909.7	14639.7	16587	2653.01	0.159946
P00492	4225.91	4783.84	3893.5	3485.71	3971.75	5207.77	4261.41	576.014	0.13517
P00505	2734.41	4494.27	6076.85	3392.91	5479.45	5360.94	4589.81	1188.95	0.259041
P00533	4491.01	3631.36	4396.9	3698.03	5181.66	4474.52	4312.25	526.341	0.122057
P00558	22920.4	20548.6	21333.8	19393.4	24388.6	19063.5	21274.7	1886.99	0.0886962
P00568	8429.76	9616.19	9634.7	9456.54	12058.9	11418.4	10102.4	1240.27	0.12277
P00734	1.18827e+06	1.16022e+06	1.40284e+06	1.20485e+06	1.33673e+06	1.23079e+06	1.25395e+06	86666.6	0.0691149
P00736	7688.92	10054.1	5948.83	8517.97	5977.04	7204.89	7565.29	1436.57	0.189889
P00738	139239	146709	141581	146065	111071	118018	133780	13981.1	0.104508
P00739	944.636	1649.92	12721.1	2518.92	1747.6	1545.9	3521.34	4139.85	1.17565
P00740	8276.37	10537.4	8405.53	8450.08	24799.7	16210.2	12779.9	6047.53	0.473207
P00742	2630.98	2644.87	2023.57	2722.31	1148.68	2175.72	2224.35	546.182	0.245547
P00746	4427.66	3795.6	4519.67	3287.9	5842.16	5703.24	4596.04	927.794	0.201868
P00747	133607	139699	120376	126534	143878	136390	133414	7907.99	0.0592741
P00748	7190.75	5064.38	6890.86	6574.29	10378	8332.67	7405.16	1642.06	0.221746
P00749	50936.7	63359.1	53347.2	54799.8	48749.1	56591.7	54630.6	4653.75	0.0851858
P00750	8561.34	5196.76	5116.18	10029.8	4502.22	4212.73	6269.84	2207.06	0.352013
P00751	56627.7	67260.7	43756.6	56354.4	49054.5	41702.1	52459.3	8705.13	0.165941
P00915	204586	221127	194080	204684	267521	240760	222127	25190.7	0.113407
P00918	60547.8	68208.9	62938.2	73202.6	57451.9	64956.4	64551	5122.15	0.0793505
P00966	36142.7	38525.9	34584.6	40015.2	32323.4	35587.1	36196.5	2516.01	0.0695099
P00995	135911	150160	135322	120569	93028	101322	122718	20124	0.163985
P01008	45185.7	35805.4	33169.9	36163.8	33721.7	34965.4	36502	4024.92	0.110266
P01009	436928	440535	463611	453934	350598	354941	416758	46093.9	0.110601
P01011	137636	108381	134481	112253	171515	138657	133821	20702.4	0.154703
P01019	104425	112375	117216	123649	96350.4	112781	111133	8769.66	0.0789116
P01023	237186	213488	229035	189263	288329	255557	235476	31252.2	0.132719
P01024	119348	105190	111559	108086	122904	124061	115191	7293.29	0.0633145
P01031	3862.08	3604.36	3805.08	3437.22	3943.84	3717.47	3728.34	168.55	0.0452079
P01033	13944.5	15302.3	16716.3	15470.5	14970.5	13938.3	15057.1	955.782	0.0634772
P01034	159994	168874	184255	180090	168772	150097	168680	11500.7	0.0681804
P01036	21563.8	28143.2	15121.9	24066.6	20882.2	21451.3	21871.5	3893.57	0.17802
P01040	78482.4	99463.4	73621.4	91813.1	87635.1	75250.9	84377.7	9373.96	0.111095
P01042	7.78096e+06	6.71958e+06	8.13216e+06	8384181	7.3477e+06	7179346	7590654	569517	0.0750287
P01111	5616.17	5094.38	5258.09	4405.98	5984.27	5821.47	5363.39	525.884	0.0980506
P01127	290304	62924.2	38834.3	55413.8	21808.9	51331.2	86769.3	91970.6	1.05994
P01130	129249	153695	134911	122201	129767	159247	138178	13546.6	0.0980373
P01133	533015	495326	577964	587488	624537	608362	571115	44256.4	0.0774912
P01210	39799.9	104202	54754	95894.2	52976	40875.7	64750.3	25682.2	0.396635
P01215	45611.9	31946.4	27853.4	25748.3	23993.3	25340.9	30082.4	7393.15	0.245764
P01225	14768.5	19446	22637.7	14958.1	13503.7	14971.8	16714.3	3234.26	0.193503
P01229	8379.47	6381.04	9315.84	7659.29	6059.03	5527.32	7220.33	1344.54	0.186216
P01258	13901.7	22674.5	18485.3	18267.2	14197.5	18335.1	17643.5	2965.44	0.168075
P01344	8568.33	8119.25	8260.85	7524.63	9780.32	9802.95	8676.06	847.458	0.0976778
P01589	16574.1	16974	13017.3	12335.2	23212.6	18346.5	16743.3	3601.33	0.215091
P01591	176527	173534	172833	155894	165828	155134	166625	8486.62	0.0509325
P01599	19959.4	23283.1	25862	23116.3	19924.4	17776.7	21653.7	2689.35	0.124198
P01619	1.57525e+06	1624688	1575756	1.45515e+06	1.48033e+06	1.38945e+06	1.51677e+06	81528.3	0.0537512
P01624	1.07641e+06	1.11769e+06	1.03057e+06	1.05393e+06	974846	946706	1.03336e+06	58207	0.056328
P01700	162588	174997	173624	166392	185795	148374	168628	11632.9	0.0689855
P01701	53841.7	51185.8	86820.1	45041.4	74165.7	75298	64392.1	15152.8	0.235321
P01704	10924.2	10229.5	10950.2	13438.2	13501.2	10304.9	11558	1379.47	0.119352
P01714	799163	302225	156590	95100.4	50799.6	556135	326669	269307	0.824404
P01715	12063.2	8129.33	8503.24	3845.27	5301.98	5866.66	7284.95	2670.96	0.36664
P01717	107122	101729	67587.6	86543.3	57969	117094	89674	21230.5	0.236752
P01721	27681.6	24462.9	23524.5	14164.6	39607.4	31685.1	26854.4	7794.2	0.29024
P01768;P0DP03	170475	178092	175537	158775	165152	154965	167166	8403.84	0.0502724
P01780	321216	167423	293531	181465	130330	169059	210504	70705.5	0.335887
P01782;P0DP04	141696	83458.5	150834	118218	153027	125288	128753	23870.8	0.185399
P01833	644002	497180	667272	554096	606331	571350	590039	56871.7	0.0963864
P01834	1765562	9827075	10676212	12335868	23887070	21833960	1.33876e+07	7.50319e+06	0.560457
P01859	3.20959e+06	3.10481e+06	3.26169e+06	3.07651e+06	2652983	2906447	3.03534e+06	204503	0.0673739
P01860	141314	127757	141749	127721	136150	204968	146610	26705.1	0.182151
P01861	569741	516515	101163	727301	652933	764497	555358	220164	0.396436
P01871	365893	387072	381379	369221	293814	350749	358021	30963.2	0.0864842
P01876	2115716	2.31923e+06	2.07953e+06	2.06527e+06	2.00315e+06	2.21442e+06	2.13289e+06	104814	0.0491419
P01877	1.9654e+06	1.17645e+06	1.11576e+06	1.83523e+06	1.82161e+06	1.64593e+06	1.59339e+06	330072	0.20715
P01903	1479.46	1409.41	1840.95	1067.5	1333.67	1255.64	1397.77	236.857	0.169453
P02008	15750.4	11692.8	10525.6	8787.66	12331.2	12033.7	11853.6	2106.93	0.177746
P02042	86088.2	77000	78075.9	66143.8	70259.3	73035.3	75100.4	6339.24	0.0844102
P02144	93.1137	168.999	372.873	209.547	391.94	645.269	313.624	182.577	0.582152
P02452	75939.1	87829.7	76639.9	76943.9	64698.7	84624.7	77779.3	7352.49	0.0945301
P02461	67574	134310	72827.2	107171	96051.9	97642.6	95929.5	22136.6	0.230759
P02511	16511.4	17661.7	16117.9	13517.8	18208.3	19010.7	16838	1776.02	0.105477
P02533	371682	420356	384201	398402	387768	399135	393591	15123.6	0.0384246
P02538	559844	531112	534521	524286	475770	526200	525289	25057.3	0.047702
P02545	34008	40246.8	39565.8	41765.2	35172.8	40743.5	38583.7	2917.99	0.0756276
P02549	25790.5	24784.4	31747.8	5192.06	18289	18822.6	20771	8311.16	0.400132
P02647	236988	254436	236868	230277	257269	227366	240534	11386.6	0.0473388
P02649	63422.3	66728.3	66904.8	56316	51521.9	54246.7	59856.7	6097.59	0.10187
P02652	55122.2	58586	52457.6	47160.1	58937.8	49835.1	53683.1	4331.65	0.0806892
P02654	4397.14	8380.46	4750.78	6905.44	4964.26	5489.09	5814.53	1399.02	0.240607
P02655	18575.5	23542.3	33519	24663.8	16031.1	33485.1	24969.5	6689.76	0.267918
P02656	14754.6	14668.5	14053.8	14251	17414.7	16097.3	15206.7	1183.56	0.0778316
P02671	281406	341017	291813	312207	242907	258054	287901	32621.3	0.113307
P02675	72551.6	106825	74016.5	95636.9	61008.2	77259.3	81216.2	15355.1	0.189065
P02679	58769.1	58304.4	63893.5	63612.8	65416.7	66202.3	62699.8	3073.5	0.0490192
P02730	5457.68	4084.07	4703.65	4132.59	28994.6	4159.45	8588.67	9138.42	1.06401
P02741	3461.86	3517.84	5143.56	3600.23	2802.77	3196.99	3620.54	730.737	0.201831
P02743	23018.4	26016.6	23834.2	22990.6	23440.7	21652.3	23492.1	1313.6	0.0559168
P02745	4865.85	7288.75	6203.62	3293.29	6684.49	6418.44	5792.41	1335.41	0.230546
P02746	26364.8	23973.2	21597.3	20269.7	30288.2	21228.3	23953.6	3475.92	0.145111
P02747	5655.17	26413.9	10357.6	7995.55	6639.28	9949.64	11168.5	7018.35	0.628404
P02748	16052.6	17087	15350.9	16307.2	18119.9	17918.6	16806	998.084	0.0593885
P02749	633599	519732	660588	606281	739222	680209	639939	67734.9	0.105846
P02750	258374	233102	248252	219107	268203	255940	247163	16489.6	0.0667155
P02751	373074	387289	419727	379907	350396	376261	381109	20665.3	0.0542242
P02753	91764.1	189501	80188.3	157207	95332.6	106034	120004	39582.3	0.32984
P02760	24845564	23869602	25484294	23630122	27233650	26260784	2.52207e+07	1.27144e+06	0.0504126
P02763	5.19772e+06	4753052	4377783	4.24541e+06	3.89847e+06	4.64474e+06	4.51953e+06	410508	0.0908299
P02765	621710	664564	639090	662812	511147	543627	607158	58989.5	0.0971567
P02766	98027.7	112001	111281	112454	97802.9	93156	104120	7959.03	0.0764406
P02768	38276352	34032220	38386712	35111196	38283896	38055392	3.70243e+07	1.76475e+06	0.0476646
P02774	128969	144698	141128	136546	105839	111678	128143	14620.4	0.114095
P02775	4284.22	5608.8	3279.99	8711.64	9734.87	11506.2	7187.61	2990.34	0.416041
P02776	1146.75	1194.02	687.37	719.312	2073.18	1194.22	1169.14	457.072	0.390946
P02786	15490.2	2143.04	39407.9	23763.4	6040.44	7411.14	15709.3	12734	0.8106
P02787	937436	961942	971363	803124	793945	836469	884046	74691.3	0.0844879
P02788	318921	334887	335883	320390	263643	268126	306975	29789.1	0.0970407
P02790	261277	195341	264230	209106	269855	272276	245348	30957.6	0.126178
P02792	8762.69	6201.22	8258.31	7397.73	10955.3	9300.83	8479.34	1488.51	0.175545
P02794	2882.08	2136.34	4907.82	2712.05	2744.27	5700.21	3513.8	1307.36	0.372065
P02795	85153.7	96686.4	103291	77546.8	100790	95722.3	93198.4	9015.97	0.0967395
P02810	9631.53	30350.3	23624.2	11887.7	11383.9	17982.7	17476.7	7457.47	0.426708
P02814	21368.9	9105.53	18345.3	19387.1	21446.2	22611.4	18710.7	4520.6	0.241604
P03950	7083.85	6973.71	4043.41	6708.71	6734.1	6936.51	6413.38	1068.02	0.16653
P03951	7178.04	7849.53	7486.06	4757.2	7917.97	4761.38	6658.36	1364.65	0.204953
P03952	4232.76	3489.3	4917.63	3578.54	3474.96	3605.7	3883.15	529.761	0.136426
P03973	135841	187972	158793	143926	95758.2	129666	141993	28069.7	0.197685
P04003	6453.52	8681.56	3627.28	7206.35	5779.26	5155.51	6150.58	1586.79	0.25799
P04004	360132	395796	401857	344514	295374	313529	351867	39183.9	0.11136
P04040	32459	31056.1	32896.4	32535.4	31277	30927.4	31858.5	790.023	0.0247979
P04054	2.08381e+06	7996.47	18694.3	3186.29	27834.4	3801.47	357554	772056	2.15927
P04062	7444.95	6009.84	8399.42	7443.44	8626.14	7090.75	7502.42	863.268	0.115065
P04066	41988.3	37075.6	42046.6	34853.2	50204	47331.5	42249.8	5333.63	0.12624
P04070	1185.13	1149.44	1866.87	1377.96	1308.85	1450.7	1389.82	237.226	0.170688
P04075	125194	120042	120631	116182	99079	126609	117956	9112.88	0.0772564
P04080	139365	167928	165255	155709	181050	159394	161450	12685.5	0.0785725
P04083	229233	207780	224167	213949	199311	207148	213598	10294.5	0.0481956
P04114	14818.5	26272.5	23333	30069.5	15086.9	15279.7	20810	6071.49	0.291758
P04118	8571.99	10775.9	17226.5	6406.22	7979.74	4640.88	9266.88	4028.14	0.434681
P04155	364523	466488	284430	417895	396474	393314	387187	55419.7	0.143134
P04156	211975	227317	198441	204506	245143	244182	221928	18336.8	0.0826254
P04179	14836.9	13279.1	14628.1	18925.5	12607	10177	14075.6	2658.21	0.188853
P04180	117723	122699	127853	118279	103601	109055	116535	8101.31	0.0695183
P04196	92454.6	63013.5	62293.7	114801	42419.2	75205	75031.1	23293.1	0.310446
P04211	84169.9	119089	108411	101099	85066.7	88500.8	97722.6	12981	0.132836
P04216	93047.5	83793.3	89587.1	87495	96286.5	92622.3	90472	4068.5	0.0449698
P04217	217073	226142	222214	218061	187333	188551	209896	15803.8	0.0752936
P04233	78231.2	68349.9	71428.5	55685.8	64396.3	52298.1	65065	8907.33	0.136899
P04259	318094	306545	329056	157292	315764	286409	285527	58816.6	0.205993
P04264	953023	1.00368e+06	1.11053e+06	1071137	929972	873755	990350	81426.1	0.0822195
P04275	7139.64	8538.51	7688.44	20880.4	8433.17	7966.98	10107.9	4840.15	0.47885
P04278	5051.39	2891.4	4643.65	5399.46	8755.23	7425.35	5694.41	1907.28	0.334938
P04279	7.89271e+06	9594715	972806	7937400	5.70843e+06	7849649	6.65928e+06	2.78175e+06	0.417725
P04406	175607	212685	214408	189510	177157	170608	189996	17600.9	0.0926386
P04424	2000.52	2116.07	817.213	1469.01	2816.59	2418.45	1939.64	647.363	0.333754
P04626	1498.05	1672.43	1747.67	654.712	1552.09	2334.5	1576.58	494.892	0.313903
P04632	16551.6	21113.8	12516.6	23327.8	14865.2	24536.7	18818.6	4449.36	0.236434
P04733	3729.59	3601.48	4283.73	2220.57	711.45	6472.94	3503.29	1776.16	0.506998
P04745	916076	950379	992474	859831	813113	879825	901949	59012.7	0.0654279
P04746	287208	200292	300065	267680	236341	231947	253922	34386.4	0.135421
P04792	171117	158017	192208	177286	190649	186824	179350	12082.9	0.0673703
P04839	4612.09	23621.4	2980.48	1708.4	7498.01	1995.86	7069.37	7652.79	1.08253
P04843	8353.04	13385.3	8729.52	9052.82	6508.76	7611.33	8940.14	2154.02	0.240938
P04844	11303.2	9592.62	43165.6	29102.2	27508.1	55772.5	29407.4	16373.2	0.556773
P04899	4884.24	3809.45	5774.96	4313.44	7061.41	6317.46	5360.16	1133.55	0.211476
P05023	6658.34	7037.63	5521.32	6804.88	6357.45	6471.44	6475.18	479.989	0.0741276
P05026	19420.2	16998.6	19889.5	17170.8	23720.5	18787.6	19331.2	2235.67	0.115651
P05060	685905	739858	615217	617947	809101	766716	705791	72871.1	0.103247
P05062	128483	183919	135649	164086	118225	121509	141978	23990.4	0.168972
P05067	201557	200128	198192	172479	174600	178549	187584	12539.9	0.0668494
P05089	17846.6	16778.9	17151.4	15724.6	20935.3	20893.4	18221.7	2004.36	0.109998
P05090	12688839	12945458	12221937	12315191	11430532	12052997	1.22758e+07	480905	0.0391749
P05091	13857.1	19822.5	7737.35	13750.8	17479.3	16187.4	14805.7	3790.33	0.256004
P05107	1533.91	1564.45	1818.39	1504.44	2026.98	2182.03	1771.7	260.333	0.146939
P05109	704421	974610	915602	888333	782820	799916	844284	90663.7	0.107385
P05120	8590.4	7743.36	6241.73	9897.47	8388.59	7217.71	8013.21	1145.15	0.142908
P05141	6553.28	7568.81	8616.62	4078.83	7211.31	5884.47	6652.22	1427.89	0.214648
P05154	218248	184947	232562	194190	256355	235248	220258	24527.5	0.111358
P05155	389731	331708	408416	329921	376580	365322	366946	28713.8	0.0782507
P05156	131089	124811	121317	112978	133817	132851	126144	7379.42	0.0585
P05160	1360.45	1670.24	3014.59	2325.6	3489.62	2005.28	2310.96	740.718	0.320524
P05161	866.256	1681.64	1113.32	1390.36	2605.57	1763.01	1570.03	556.506	0.354456
P05164	80501	82980	83430	71648.2	82808.2	83637	80834.1	4234.56	0.0523859
P05186	18588.7	8779.9	4221.47	20451.7	3595.92	6989.14	10437.8	6668.46	0.638877
P05198	3533.95	2258.19	2169.69	2144.09	2684.36	2617.56	2567.97	480.17	0.186984
P05204;Q15651	25164.7	28285.6	18076.4	20019.2	24176.6	29835.9	24259.7	4170.19	0.171898
P05362	30575.9	26741.5	31172.7	25904.2	41089.4	35540.8	31837.4	5204.48	0.163471
P05387	14423.7	10687.8	15081.2	12951.3	19076.1	16508.9	14788.1	2637.97	0.178384
P05388	1234.36	1602.85	6754.49	1871.45	2484.48	3102.24	2841.65	1851.35	0.651508
P05413	62905.4	76947.6	60846.7	66608.9	68844.5	75676.3	68638.3	6004.35	0.0874782
P05451	573064	569894	573789	484429	541708	537775	546776	31488.4	0.0575892
P05452	195235	224916	198632	213907	164768	168627	194348	21881	0.112587
P05534	779.573	1179.23	685.081	1225.21	1620.28	1540.25	1171.6	348.936	0.297827
P05543	107623	108581	108165	114302	106538	113236	109741	2932.23	0.0267196
P05546	22559.4	19428.2	21320.8	18622	24057.6	23240.1	21538	1970.2	0.0914754
P05556	18101.7	35236	15099.4	27721.9	31953.9	31455	26594.7	7444.9	0.27994
P05783	8430.27	6599.56	6324.44	8504.27	10050.5	9031.22	8156.71	1312.05	0.160855
P05787	28371.3	26242.6	29309.2	24940.6	31187.6	28121.7	28028.8	2019.54	0.0720521
P05937	44841.5	27334.3	140037	32516	52652.6	126052	70572.3	45100.5	0.639069
P05981	4984.73	6577.38	5919.92	5678.76	7258.26	6095.28	6085.72	709.691	0.116616
P06132	1861.08	1724.41	2422.85	2073.22	2721.85	1950.4	2125.64	343.57	0.161632
P06280	29789	32468.5	32381.2	25655.3	36665.7	28504.1	30910.6	3473.2	0.112363
P06312	123717	163855	112203	145400	133729	119544	133075	17349.8	0.130377
P06396	521536	610597	515762	558240	491304	487650	530848	42533	0.0801227
P06454	432843	418259	343662	457738	289452	344562	381086	59255.8	0.155492
P06576	10247	4413.17	10962.6	7966.28	10351.3	9890.07	8971.74	2240.83	0.249765
P06681	2801.81	2991.26	3285.99	3141.96	3031.12	3064.76	3052.82	147.038	0.0481648
P06702	1.66934e+06	1.46005e+06	1.50326e+06	1.68884e+06	1.56125e+06	1.62645e+06	1.58486e+06	84134	0.0530859
P06703	117523	157686	106234	140560	133381	114684	128345	17455.2	0.136002
P06727	47072.4	51569	42497	41833.4	54447.4	52978.2	48399.6	4954.82	0.102373
P06731	105322	102073	108053	155606	177989	109288	126389	29382.3	0.232476
P06733	66092.4	75556.3	68062.3	68620.9	65453.1	74783.6	69761.4	3979.39	0.0570429
P06734	15556	13102.4	13835.9	11602.3	12029.6	9772.53	12649.8	1817.42	0.143672
P06737	605.133	625.271	697.035	867.382	761.957	1053.88	768.442	154.688	0.201301
P06744	7992.82	7957.72	7431.28	6929.98	10387	9308.25	8334.51	1169.62	0.140335
P06748	3777	3218.01	1820.18	3227.44	2667.6	3593.24	3050.58	650.901	0.21337
P06753	12148.9	12024.7	10564.5	11901.3	11737.9	11291.6	11611.5	541.306	0.0466181
P06756	6451.49	4373.46	3194.38	777.953	5088.38	5110.8	4166.08	1799.67	0.431982
P06858	580.786	1037.45	1394.19	1254.12	758.759	516.258	923.594	330.222	0.35754
P06865	45881.7	48192.9	48295.4	47148.3	44622	48771.8	47152	1473.6	0.0312521
P06870	1268817	875763	1.25432e+06	1118681	1.09037e+06	1.26368e+06	1.14527e+06	139960	0.122207
P06899;P23527;P33778;Q16778	236304	198426	255587	250189	264389	286041	248489	26990.9	0.10862
P07099	2965.87	2721.58	3584.48	2845.26	2057.42	37861.7	8672.72	13061.4	1.50603
P07108	39670.6	37493.4	44003.4	40322	39375	34212.8	39179.5	2954.25	0.0754028
P07148	23686.3	48958.1	21691.5	30098.8	24915	25908.7	29209.7	9193.84	0.314753
P07195	60474	63331.5	60325	57224.2	63815.7	57942.4	60518.8	2460.11	0.0406503
P07203	4016.8	2756.83	3832.33	4459.23	5886.32	5425.61	4396.19	1035.5	0.235545
P07204	64643.5	63872.5	55526.7	52006.3	55575.8	56518.8	58023.9	4631.98	0.0798289
P07225	2759.5	2114.93	3026.88	3090.77	3729.93	2472.66	2865.78	508.746	0.177524
P07237	44894.8	49273.5	48477.1	45308.1	46829.9	51960	47790.6	2433.29	0.0509156
P07288	4080.22	5896	3762.49	4083.98	4292.67	6783.67	4816.51	1117.97	0.232112
P07305	24489.8	29024.3	27180.6	15942.7	25219.8	26623.3	24746.7	4194.1	0.169481
P07306	39830.2	32952.5	30117.1	25065.7	15473.2	24983.1	28070.3	7567.12	0.269577
P07307	9962.87	13729.6	7978.89	11612.6	12884.6	11791.5	11326.7	1895.91	0.167384
P07311	2105.58	2892.25	2330.8	1782.89	1228.15	1211.41	1925.18	598.31	0.310781
P07333	6376.63	3164.22	5344.13	4967.81	7829.47	9633.23	6219.25	2079.18	0.334314
P07339	224394	226926	225148	249547	195664	201978	220610	17708.7	0.0802719
P07355	126248	181224	126049	162154	139329	142820	146304	19765.1	0.135096
P07357	3041.11	12217	3899.48	7444.28	12309.1	1390.29	6716.88	4318.08	0.64287
P07358	6769.85	9736.51	6351.01	3168.57	7474.41	5216.33	6452.78	2010.49	0.311569
P07359	5565.07	4613	4981.63	5282.58	6187.58	4779.29	5234.86	528.734	0.101003
P07360	7825.49	6294.09	6167.75	8950.34	6996.45	6989.45	7203.93	951.036	0.132016
P07384	23060.3	19971.5	22745.3	23696.3	23686.8	23419.9	22763.4	1293.39	0.0568189
P07437	7520.77	10156	12676.5	13686.1	11973.7	8282.74	10716	2261.66	0.211055
P07476	102474	88060.8	104875	92727.1	82062.2	86409	92768	8346.59	0.0899727
P07477	29283.7	11351	21788.2	15952.2	14191.2	15722.3	18048.1	5912.63	0.327604
P07478	140063	43588.9	158964	118544	136205	137542	122484	37181.5	0.303561
P07585	15137.2	12121.6	15202	12375.3	22118.5	29593.1	17757.9	6234.67	0.351092
P07602	5.65049e+06	6385346	5544519	5429714	6.01487e+06	6239681	5.87744e+06	358440	0.0609858
P07686	98737	87968.3	94397.2	81130	75605.1	82328.7	86694.4	7947.48	0.0916724
P07711	95648	88871.3	90484	101131	97246.5	94715.6	94682.8	4092.51	0.0432234
P07737	33230.2	40541.7	33181.5	39751.3	25876	29583.3	33694	5197.4	0.154253
P07738	10379.5	9591.1	9333.25	10197.7	11564.3	11460.9	10421.1	847.752	0.0813493
P07741	4772.61	4430.8	2638.26	3658.11	4335.99	4998.03	4138.97	790.234	0.190925
P07858	349856	317100	312984	320665	285110	219104	300803	41100.7	0.136637
P07864	366.535	1235.02	766.173	221.308	1722.28	3899.05	1368.39	1240.26	0.90636
P07900	11593.8	10125.4	12742.8	8947.38	11893.6	11123.9	11071.1	1235.02	0.111553
P07910	3875.88	2956.55	3385.79	2942.98	5587.8	3964.93	3785.66	898.649	0.237383
P07911	32026886	36558032	32902124	32496014	34319712	34427124	3.37883e+07	1.52314e+06	0.045079
P07942	7128.76	4759.02	7890.83	6231.65	6258.82	4145.67	6069.12	1285.81	0.211861
P07947	3468.85	1979.7	2239.38	2263.11	2816.54	2480.28	2541.31	487.13	0.191685
P07996	129979	153133	124892	139702	118339	132913	133160	11105	0.0833961
P07998	4.25999e+06	5363555	7.31532e+06	3.96338e+06	2793252	4.30184e+06	4.66622e+06	1.4026e+06	0.300587
P08069	5160.53	7968.83	8672.46	3146.42	4985.83	9627.69	6593.63	2307.25	0.34992
P08123	110515	39199.6	26603.3	115784	60218	26358.9	63113.2	37160.1	0.588786
P08133	7942.69	6229.88	8054.86	7478.32	10601.1	8602.83	8151.61	1316.75	0.161532
P08138	531378	605515	514526	557494	516374	506775	538677	34090.7	0.063286
P08174	530522	546061	646171	571158	586408	530862	568530	40255.5	0.0708063
P08183	7938.47	8016.57	7604.4	8175.68	8751.45	7946.36	8072.16	348.269	0.0431445
P08185	82176.4	83622.2	77899.1	73965.4	74425.9	81662.5	78958.6	3786.24	0.0479522
P08195	21795	21425.6	25590.7	22360.3	30939.9	28444.2	25092.6	3593.01	0.14319
P08217	13502.4	14019.9	10664.4	14534.7	13087.6	15520.2	13554.9	1506.36	0.111131
P08236	102927	105776	112671	113295	100508	109718	107483	4796.11	0.0446222
P08238	27752.7	37974.1	25843.4	35948	28183.3	27244.1	30490.9	4668.01	0.153095
P08246	130485	154531	148157	128035	105166	115226	130267	17176.1	0.131853
P08253	32445.7	34441.9	15773.2	19923.8	25993.3	26344	25820.3	6509.53	0.252109
P08294	85699.5	86684	81116.8	69645.3	94404.7	83565	83519.2	7433.3	0.0890011
P08311	45441.6	40977.4	27978.3	30725.1	29944.2	23579.6	33107.7	7603.04	0.229646
P08397	347.176	2446.22	2131.5	2691.43	602.294	1297.26	1585.98	898.634	0.566611
P08473	21419.5	26643.4	18602.9	22812.7	25950.6	25293.9	23453.8	2824.72	0.120438
P08476	1813.4	2470.91	2984.52	2908.58	3417.77	1776.13	2561.89	607.904	0.237288
P08493	4149.75	6092.94	5878.35	6627.54	6021.47	6527.62	5882.94	820.296	0.139436
P08519	247606	276802	250227	234124	237976	287209	255658	19635.3	0.0768031
P08571	346945	294096	379883	322299	516513	429707	381574	74042.1	0.194044
P08572	50560.3	49462.5	55566.2	50228.7	48882.3	52080.3	51130.1	2219.32	0.0434053
P08581	1352.19	1586.65	906.392	1342.06	1478.4	1612.36	1379.68	235.547	0.170726
P08582	58065.3	59158.9	64975.3	60130.9	55495.6	51133.4	58159.9	4238.93	0.0728841
P08603	195199	32644.4	211396	141916	152525	156971	148442	57286.6	0.385919
P08637	108284	126066	102106	132012	125595	125505	119928	10802.3	0.0900737
P08670	143506	145232	25071.2	129997	97092.8	140876	113629	42851.7	0.377119
P08697	29013.8	18542.1	33125.9	28774.5	28270.1	30916.8	28107.2	4580.16	0.162953
P08727	39802	44492.1	38999.3	38271.9	41885.3	39178.4	40438.2	2132.42	0.0527329
P08729	3676.59	3939.49	4121.81	4039.14	6688.52	6708.34	4862.31	1305.52	0.268499
P08754	5447.91	4080.12	9001.32	4780.85	8140.08	3962.42	5902.12	1964.66	0.332873
P08758	50588.4	44370.1	49522.9	47107.3	56338.5	52203.3	50021.8	3778.59	0.0755389
P08779	15772.8	10826.7	17157.4	12943	14295.2	12798.5	13965.6	2074.55	0.148547
P08833	6535.72	6259.61	4853.07	5900.8	7980.97	7926.42	6576.1	1104.81	0.168005
P08861	7841.24	7179.51	6166.92	7648.55	10135.3	6503.53	7579.18	1285.73	0.16964
P08865	12910.6	8827.61	11824.6	9317.31	5896.07	21492.5	11711.5	4915.75	0.419739
P08887	3320.17	2608.6	3709.01	2602.51	3214.54	2246.53	2950.22	502.538	0.170339
P08962	20283.4	19362.8	20927.7	15829.3	17583.2	16407.5	18399	1919.58	0.10433
P09093	4123.39	30347.9	6131.51	8543.65	10981.6	16286	12735.7	8767.66	0.688434
P09110	531.46	791.865	695.348	706.46	1030.75	1112.7	811.432	200.885	0.247568
P09210	100182	95662.8	105215	100210	92186.7	109308	100461	5664.07	0.056381
P09211	95656.7	63802.8	79937.5	73792.9	74943.8	86134.6	79044.7	10031.1	0.126904
P09228	1120.54	1734.47	2256.3	1227.75	1965.13	2714.86	1836.51	556.456	0.302997
P09237	32824.3	32560.4	30329.6	28603	34549.1	29709.9	31429.4	2045.8	0.065092
P09238	3163.47	3822.45	4034.46	3063.29	3297.79	4143.9	3587.56	428.777	0.119518
P09327	4266.85	1059.37	988.961	1955.82	2894.53	979.326	2024.14	1216.96	0.601224
P09382	6746.82	5497.62	7229.67	5844.85	8116.95	6949.85	6730.96	868.346	0.129008
P09417	26880.7	29583.6	29498.3	38983.5	23867.6	31037.1	29975.1	4646.43	0.15501
P09429	2591.4	1916.92	3699.4	2796.14	2707.22	2906.73	2769.63	523.886	0.189153
P09466	23596.6	18655.6	22437.7	21570.2	23964.4	30499	23453.9	3594.42	0.153255
P09467	46991.5	36762.7	46849.1	42703.4	57036.6	50578.8	46820.4	6280.06	0.134131
P09486	4481.51	3845.55	4356.72	2891.47	4270.42	4169.5	4002.53	534.417	0.13352
P09488	3144.66	3600.46	3484.81	5424.68	3278.77	3099.63	3672.17	803.366	0.218771
P09497	28034.1	7313.23	6574.19	6595.18	6705.26	8045.85	10544.6	7838.71	0.743383
P09525	16226.8	14324.1	15936.4	14785.7	39489	66464.4	27871.1	19395.8	0.695912
P09529	3377.54	3558.48	3745.3	2312.23	3817.18	2267.19	3179.65	644.731	0.202768
P09543	2852.05	3366.87	3970.66	3036.28	3242.58	4504.93	3495.56	570.108	0.163095
P09564	17815.2	10868.6	17001.8	19561.3	19025.3	12956	16204.7	3201.03	0.197537
P09601	2821.79	2487.87	3028.43	3334.41	3620.53	3929.4	3203.74	484.16	0.151124
P09603	145421	260234	302663	247721	265846	297065	253158	52004	0.205421
P09619	42010.4	36810	41118.8	34045.6	45078.7	41923.7	40164.5	3657.32	0.0910585
P09622	5365.4	11651	6414.85	16977.7	6218.83	5357.85	8664.26	4298.99	0.496175
P09651	25254.8	31571.9	980.425	35465.3	3308.07	1662.13	16373.8	14710.8	0.898436
P09668	96767.9	100922	93820	101700	84945.4	99102.5	96209.7	5680.78	0.0590458
P09669	47872.8	30105.5	22770.1	17851.5	3291.7	4643.78	21089.2	15270.7	0.724099
P09758	27319.2	34924.8	26182.7	32076.1	20618.8	26327.5	27908.2	4574.62	0.163917
P09871	9223.03	9738.47	8900.4	9272.57	9092.8	9936.5	9360.63	361.622	0.0386322
P09923	8330.59	10202	9874.41	8705.52	11619.4	10407.9	9856.62	1094.27	0.111019
P09936	12048.8	11498	10757.9	9929.27	12998.9	11337.4	11428.4	962.773	0.084244
P09958	84608.9	103916	120195	70061	67189.9	4728.12	75116.3	36502.2	0.485942
P09960	6238.25	5873.88	6172.44	5049.58	8113.61	6374.68	6303.74	918.32	0.145679
P09972	53429.6	48647.7	76026.4	133275	43773.9	36579.3	65288.7	32767.2	0.501882
P0C0L4	15944.7	19115.4	17198.4	20493.6	15144.6	18251.5	17691.4	1824.57	0.103133
P0C0L5	120023	128284	117543	129899	76856.3	89419.1	110337	20037.5	0.181603
P0C0S5;Q71UI9	3638.15	4338.95	3770.67	3984.14	3053.47	2982.11	3627.92	483.046	0.133147
P0C0S8;P20671;Q16777;Q6FI13;Q96KK5;Q99878;Q9BTM1	343274	360082	376948	276723	271195	299815	321339	40912.2	0.127318
P0C7U0	7098.92	7097.83	5955.23	8171.38	6403.53	5734.31	6743.53	821.192	0.121775
P0DJD8	1258706	1.10313e+06	1.20634e+06	1.18925e+06	1152752	1.18121e+06	1.1819e+06	47618.3	0.0402896
P0DMQ5	1.69136e+06	1.48359e+06	1.8457e+06	1.3599e+06	1407265	1516173	1.55066e+06	168070	0.108386
P0DMV8;P0DMV9	58451.2	54765.3	56949.5	53120.1	63823.7	66671.8	58963.6	4815.41	0.0816674
P0DOX2	365426	650574	377200	555212	570164	525542	507353	103410	0.203823
P0DOX3	12575.3	11127.1	12641.9	12247.4	13346.6	11069.2	12167.9	824.288	0.0677428
P0DOX5	3.49288e+06	3.07716e+06	3632551	3.42056e+06	2975895	3024976	3270670	254135	0.0777011
P0DOX7	1.76829e+06	1.57454e+06	1.52964e+06	1.51679e+06	1.8971e+06	1.7254e+06	1.66863e+06	139392	0.0835367
P0DOX8	932543	1.22691e+06	980453	1.20523e+06	1162430	1.06251e+06	1.09501e+06	111555	0.101875
P0DOY2;P0DOY3	2.99675e+06	2323691	4394288	3.62861e+06	1.26391e+06	3.35555e+06	2.9938e+06	994718	0.332259
P0DP23;P0DP24;P0DP25	194316	189996	193299	189802	163981	154189	180931	15787.1	0.087255
P0DP57	638176	641845	706267	724870	572971	569349	642246	59238.5	0.0922364
P0DPH7;P0DPH8	2525.56	1747.37	3313.33	3084.81	3620.31	2727.96	2836.56	605.262	0.213379
P10082	9598.46	2120.95	2934.66	2907.71	7246.14	4931.07	4956.5	2680.69	0.540844
P10109	1819.24	8745.33	4504.48	7531.39	3714.21	5500.87	5302.59	2314.91	0.436563
P10153	5071109	4.97986e+06	5237175	4.88584e+06	5049983	4610429	4.9724e+06	193408	0.0388963
P10155	1670.21	1183.23	1116.96	1510.66	1682.57	1377.23	1423.48	219.628	0.15429
P10253	466697	447858	487274	448880	503399	507004	476852	23974.7	0.0502771
P10301	2468.29	2628.77	3227	1610.1	1770.23	1827.27	2255.28	572.106	0.253675
P10316	28903.5	21469.6	21192	20071.8	20810.5	20158.1	22100.9	3083.75	0.13953
P10323	1166.63	3130.32	292.031	1994.25	1831.39	2431.58	1807.7	902.048	0.499003
P10451	7674107	8257838	7.78149e+06	8.0917e+06	6501513	7.06111e+06	7.56129e+06	605672	0.0801016
P10515	2965.38	1612.69	3747.11	1202.23	5110.64	6988.19	3604.37	1995.19	0.553548
P10586	10182.9	9724.16	9405.85	9275.31	13248.4	12727.8	10760.7	1607.7	0.149404
P10599	236171	215826	233775	229311	204379	191583	218507	16296.8	0.0745825
P10606	3347.9	3046.65	4164.24	2615.92	6697.37	4316.87	4031.49	1332.1	0.330424
P10619	102265	96781.1	119011	110784	100722	102670	105372	7390.22	0.0701343
P10643	119322	115380	113584	114236	119470	120478	117078	2753.49	0.0235184
P10645	63609.8	38393.4	55644.1	52540.2	49190.7	45282.8	50776.8	7932.37	0.15622
P10646	19551.4	9393	18477.1	18923.8	18048.2	18266	17109.9	3485.4	0.203706
P10721	32476.4	76244.9	85063.8	6830.41	35022.2	58385.2	49003.8	27011.3	0.551207
P10768	9962.81	9533.63	8628.97	10696.7	11325.9	9837.27	9997.55	853.275	0.0853484
P10809	16918.3	3024.43	3674.82	2973.22	3519.29	2800.1	5485.02	5122.38	0.933885
P10909	299059	351643	317340	318879	309023	298932	315813	17829.3	0.0564552
P10912	6607.82	5608.08	5421.14	4542.46	7065.44	7147.67	6065.43	949.488	0.156541
P11021	43236.8	51517.3	50981.8	49945	44860.6	45550.3	47682	3239.97	0.0679496
P11047	48314.2	46116.4	51250.2	45103.9	44158.8	46646.6	46931.7	2321.52	0.0494659
P11117	229821	239335	237231	219705	261875	249692	239610	13510.1	0.0563839
P11142	42695.8	37889	41232.5	40688.6	51982.6	51964.8	44408.9	5535.15	0.124641
P11166	68344.9	4411.56	27790.5	6626.26	16016.3	9669.58	22143.2	22040.9	0.99538
P11168	6818.9	4273.71	3786.74	2600.87	5522.48	3455.06	4409.63	1392.38	0.315758
P11171	9487.08	10771.6	15099.4	10523	8298.09	13853.2	11338.7	2384.88	0.210331
P11215	6138.5	4721.13	1898.64	6822.58	4596.01	2063.92	4373.47	1859.33	0.425139
P11216	7623.19	18317.8	6775.15	4231.08	2663.69	7709.34	7886.71	5013.11	0.63564
P11217	925.63	761.785	1182.89	1430.56	1541.53	2535.68	1396.35	575.927	0.412453
P11233	2295.31	2200.87	1688.28	2552.01	2806.21	1910.36	2242.18	373.177	0.166435
P11234	7669.34	8230.64	8550.08	7119.58	6302.05	8392.48	7710.7	793.216	0.102872
P11277	43601.8	66537.3	43159.6	11126.1	16314.4	47634.7	38062.3	18963.4	0.498218
P11279	231807	240216	254661	214862	281643	263447	247773	21738.8	0.087737
P11310	23670.7	3005.14	6860.83	3462.42	4521.76	38711	13372	13382.3	1.00077
P11362	46095.6	38126.7	54733.4	41745.8	59677.7	54716.8	49182.7	7731.46	0.157199
P11413	1898.2	1937.12	2227.04	17393.1	2028.57	1744.97	4538.17	5750.75	1.26719
P11586	13429.2	9698.79	12481.2	10337.5	13535	15608.5	12515	2004.98	0.160206
P11597	4979.86	5114.16	4791.16	4783.8	7574.21	5259.22	5417.07	979.276	0.180776
P11684	63217.1	83488.8	53436.5	70274.2	62371.9	66081.7	66478.4	9142.46	0.137525
P11717	24696.3	25367.3	25973.6	26797.8	25140.4	25332.6	25551.3	672.524	0.0263205
P11766	28667.5	19279.9	29223.2	36262	25053.4	25718.8	27367.5	5127.2	0.187346
P11940	3543.57	3223.45	3073.94	3417.23	3349.8	2303.1	3151.85	407.151	0.129178
P12035	48492.4	30763.6	468.619	50086.7	13879	64115.5	34634.3	22034.2	0.636195
P12081	2431.17	1415.86	1744.55	1657.19	3824.55	2470.6	2257.32	802.399	0.355465
P12109	309461	273796	313387	286633	391796	370759	324305	42862.1	0.132166
P12110	3174.71	1925.33	3720.47	2626.68	3590.23	3442.4	3079.97	625.78	0.203177
P12111	140084	127898	156725	130174	141948	135834	138777	9442.1	0.0680379
P12259	52396.6	50535.6	53700.1	55192.5	41275	45485.8	49764.3	4879.46	0.0980514
P12273	577443	737009	594091	708754	687519	678309	663854	58409.9	0.0879861
P12277	8836.29	7141.45	7752.19	7236.98	11344.8	9183.48	8582.53	1450.99	0.169063
P12318	5971.74	9160.09	7648.65	11198.2	7449.58	7699.52	8187.96	1632.62	0.199393
P12319	17594.4	15581.2	19134.5	17429.5	14552.1	17798.5	17015	1513.01	0.0889219
P12429	29677	27961.1	28176.8	26650.7	38186.1	33346	30666.3	3965.42	0.129309
P12532	3479.44	6360.82	20124.6	11518.9	6852.97	5621.11	8992.97	5531.27	0.615066
P12724	8913.13	5576.67	8968.71	7928.41	15358.3	10796.2	9590.24	3012.2	0.31409
P12814	36557.1	31686.1	33917.1	31495.3	44597.1	41689.7	36657.1	4953.83	0.13514
P12821	11899.6	12642.1	10573.9	12024.8	13277.6	13393.9	12302	956.091	0.0777184
P12830	243519	338806	276528	307348	177426	195186	256468	57650.6	0.224786
P12931	4419.29	5014.15	5487.75	4557.54	4325.5	3742.92	4591.19	548.262	0.119416
P12955	59015.9	23584.3	26384.8	25407.3	29862.7	29231.4	32247.7	12162.4	0.377155
P13010	662.638	712.251	529.645	304.67	296.785	373.027	479.836	166.089	0.346137
P13073	8179.39	3680.24	5411.68	4882.86	7184.49	7428.74	6127.9	1584.89	0.258636
P13284	25964.2	23680.9	23083.8	16368	24201.7	14026.8	21220.9	4400.99	0.20739
P13473	635996	645965	660342	651337	923887	861468	729832	116772	0.159999
P13489	19064.4	17640.4	20944.5	19535.3	24190.1	20867	20373.6	2042.16	0.100235
P13521	26287.7	23937.2	24985.4	18645.1	33510.5	24668.4	25339	4378.39	0.172792
P13591	89720.4	87334.7	95761.3	90235.4	123135	117574	100627	14266	0.141771
P13598	99662.5	115573	101958	87243.9	127177	120056	108612	13571.1	0.124951
P13611	35230.9	42991.1	38830.9	37355.6	32919.1	30126.8	36242.4	4142.33	0.114295
[truncated: 1,665 more rows]

## Sheet: sample after filing miss value
PG.ProteinAccessions	[1] 1.raw.PG.Quantity	[2] 1_220704104321.raw.PG.Quantity	[3] 1_220707180103.raw.PG.Quantity	[4] 2.raw.PG.Quantity	[5] 2_220704164124.raw.PG.Quantity	[6] 2_220707202757.raw.PG.Quantity	[7] 3.raw.PG.Quantity	[8] 3_220704141512.raw.PG.Quantity	[9] 3_220707225512.raw.PG.Quantity	[10] 4.raw.PG.Quantity	[11] 4_220704190757.raw.PG.Quantity	[12] 4_220708012202.raw.PG.Quantity	[13] 5.raw.PG.Quantity	[14] 5_220710150123.raw.PG.Quantity	[15] 5_220711002714.raw.PG.Quantity	[16] 6.raw.PG.Quantity	[17] 6_220707130648.raw.PG.Quantity	[18] 6_220711025435.raw.PG.Quantity	[19] 7.raw.PG.Quantity	[20] 7_220705063501.raw.PG.Quantity	[21] 7_220708061621.raw.PG.Quantity	[22] 8.raw.PG.Quantity	[23] 8_220703011008.raw.PG.Quantity	[24] 8_220708084313.raw.PG.Quantity	[25] 9.raw.PG.Quantity	[26] 9_220706004842.raw.PG.Quantity	[27] 9_220708111018.raw.PG.Quantity	[28] 10.raw.PG.Quantity	[29] 10_220705123356.raw.PG.Quantity	[30] 10_220708133746.raw.PG.Quantity	[31] 11.raw.PG.Quantity	[32] 11_220705150048.raw.PG.Quantity	[33] 11_220708160439.raw.PG.Quantity	[34] 12.raw.PG.Quantity	[35] 12_220705172759.raw.PG.Quantity	[36] 12_220708183135.raw.PG.Quantity	[37] 13.raw.PG.Quantity	[38] 13_220705195453.raw.PG.Quantity	[39] 13_220708205845.raw.PG.Quantity	[40] 14.raw.PG.Quantity	[41] 14_220706031536.raw.PG.Quantity	[42] 14_220711124550.raw.PG.Quantity	[43] 15.raw.PG.Quantity	[44] 15_220706054230.raw.PG.Quantity	[45] 15_220711151403.raw.PG.Quantity	[46] 16.raw.PG.Quantity	[47] 16_220706073611.raw.PG.Quantity	[48] 16_220711174217.raw.PG.Quantity	[49] 17.raw.PG.Quantity
[truncated: 1,593 more rows]
[truncated: 6 more columns]

[truncated: 17 more sheets: Sheet1, 1, 1-p value adjust, 2, 2-p value adjust, 3, 3-p value adjust, 4, 5, 5-p value adjust, 6, 6-p value adjust, 7, 7-p value adjust, 8, 9, 9-p value adjust]
