# Supplementary material for: Urinary proteome comparison in modified electroconvulsive therapy in depression disorder：new approach in the therapeutic mechanism
Source: Research Square preprint supplement (doi:10.21203/rs.3.rs-6664029/v1), 2025-05-23
Supplement: Supplementary file 4 [file 9ef3ddc26083defb22af5b4c.xlsx]

## Sheet: Sheet1
Canonical Pathways enriched by differential proteins through IPA software(P <0.05）
P-1						P-2						P-3						P-4						P-5						P-6						P-7						P-8						P-9
Ingenuity Canonical Pathways	-log(p-value)	P	Ratio	z-score	Molecules	Ingenuity Canonical Pathways	-log(p-value)	P	Ratio	z-score	Molecules	Ingenuity Canonical Pathways	-log(p-value)	P	Ratio	z-score	Molecules	Ingenuity Canonical Pathways	-log(p-value)	P	Ratio	z-score	Molecules	Ingenuity Canonical Pathways	-log(p-value)	p	Ratio	z-score	Molecules	Ingenuity Canonical Pathways	-log(p-value)	P-value	Ratio	z-score	Molecules	Ingenuity Canonical Pathways	-log(p-value)	P-value	Ratio	z-score	Molecules	Ingenuity Canonical Pathways	-log(p-value)	p-value	Ratio	z-score	Molecules	Ingenuity Canonical Pathways	-log(p-value)
Acute Phase Response Signaling	13.3	5.01187e-14	0.0978	3.317	A2M,AGT,C3,C4A/C4B,C9,CP,FGG,HP,HPX,ITIH2,ITIH4,PLG,SERPINA1,SERPINA3,SERPIND1,SERPINF2,SOD2,TF	Gluconeogenesis I	5.06	8.70964e-06	0.16	2	ALDOB,MDH1,PGAM1,PGK1	FAT10 Signaling Pathway	13	1e-13	0.259	#NUM!	PSMA1,PSMA3,PSMA4,PSMA5,PSMA6,PSMA7,PSMB1,PSMB2,PSMB3,PSMB4,PSMB6,PSMC4,PSMD2,UBA1	Gα12/13 Signaling	4.63	2.34423e-05	0.0376	-1.342	CDH11,CDH19,CDH3,CDH6,MYL6	FAT10 Signaling Pathway	12.5	3.16228e-13	0.259	#NUM!	PSMA1,PSMA3,PSMA4,PSMA5,PSMA6,PSMA7,PSMB1,PSMB2,PSMB3,PSMB4,PSMB6,PSMC4,PSMD2,UBA1	FXR/RXR Activation	4.3	5.01187e-05	0.04	#NUM!	AGT,APOA4,FBP1,HPX,TF	CLEAR Signaling Pathway	4.59	2.5704e-05	0.0285	0.707	GNS,NAGLU,NEU1,PLBD2,RAP1B,SGSH,TGFBR3,YWHAB	Acute Phase Response Signaling	26.8	1.58489e-27	0.168	3.5	A2M,AGT,AHSG,APOA1,APOA2,C1R,C1S,C3,C4A/C4B,C4BPA,C5,C9,CP,CRP,FGA,FGB,FGG,HNRNPK,HP,ITIH2,ITIH4,KLKB1,LBP,ORM2,RALB,RAP2B,SERPINA1,SERPINA3,SERPINF1,TF,TTR	Huntington's Disease Signaling	14.1
LXR/RXR Activation	10.2	6.30957e-11	0.106	3.051	A1BG,AGT,C3,C4A/C4B,C9,CD14,HPX,ITIH4,LCAT,PON1,SERPINA1,SERPINF2,TF	Phagosome Maturation	3.86	0.000138038	0.0405	#NUM!	CTSA,CTSD,MPO,PRDX2,PRDX5,TUBA1B	Remodeling of Epithelial Adherens Junctions	11.7	1.99526e-12	0.212	2.449	ACTN1,ACTN4,ARPC1A,ARPC2,ARPC4,ARPC5,CTNNA1,DNM2,IQGAP1,RAB5B,RALA,TUBA1B,TUBB4B,VCL	CLEAR Signaling Pathway	4.08	8.31764e-05	0.0214	2.449	CTSA,GLA,GLB1,GUSB,HEXB,IFI30	Remodeling of Epithelial Adherens Junctions	11.2	6.30957e-12	0.212	2.449	ACTN1,ACTN4,ARPC1A,ARPC2,ARPC4,ARPC5,CTNNA1,DNM2,IQGAP1,RAB5B,RALA,TUBA1B,TUBB4B,VCL	Folate Polyglutamylation	4	0.0001	0.4	#NUM!	MTHFD1,SHMT1	ID1 Signaling Pathway	3.68	0.00020893	0.03	2.449	ACVR1B,APP,CCN2,PGF,RAP1B,TGFBR3	LXR/RXR Activation	25.2	6.30957e-26	0.211	3.922	A1BG,AGT,AHSG,APOA1,APOA2,APOA4,APOB,APOC1,APOC3,APOD,APOE,C3,C4A/C4B,C9,CD14,FGA,GC,IL1R2,ITIH4,LBP,ORM2,PON1,SERPINA1,SERPINF1,TF,TTR	FAT10 Signaling Pathway	14
Coagulation System	9.24	5.7544e-10	0.229	-0.707	A2M,F11,FGG,PLG,SERPINA1,SERPINC1,SERPIND1,SERPINF2	Glycolysis I	3.57	0.000269153	0.125	#NUM!	ALDOB,PGAM1,PGK1	BAG2 Signaling Pathway	11.6	2.51189e-12	0.185	#NUM!	HSP90AA1,HSPA5,PSMA1,PSMA3,PSMA4,PSMA5,PSMA6,PSMA7,PSMB1,PSMB2,PSMB3,PSMB4,PSMB6,PSMC4,PSMD2	RHOGDI Signaling	3.62	0.000239883	0.0229	-2.236	CDH11,CDH19,CDH3,CDH6,MYL6	BAG2 Signaling Pathway	11.1	7.94328e-12	0.185	#NUM!	HSP90AA1,HSPA5,PSMA1,PSMA3,PSMA4,PSMA5,PSMA6,PSMA7,PSMB1,PSMB2,PSMB3,PSMB4,PSMB6,PSMC4,PSMD2	Acute Phase Response Signaling	3.51	0.00030903	0.0272	#NUM!	AGT,HPX,SERPINA3,SERPING1,TF	Protein Kinase A Signaling	3.57	0.000269153	0.0203	0.447	CAMK2D,FLNA,MYL6,PTPRD,PTPRJ,RAP1B,TTN,YWHAB	FXR/RXR Activation	22.2	6.30957e-23	0.192	#NUM!	A1BG,AGT,AHSG,APOA1,APOA2,APOA4,APOB,APOC1,APOC3,APOD,APOE,C3,C4A/C4B,C9,FETUB,FGA,GC,ITIH4,ORM2,PON1,SERPINA1,SERPINF1,TF,TTR	Acute Phase Response Signaling	13.9
FXR/RXR Activation	8.97	1.07152e-09	0.096	#NUM!	A1BG,AGT,C3,C4A/C4B,C9,HPX,ITIH4,LCAT,PON1,SERPINA1,SERPINF2,TF	Axonal Guidance Signaling	3.54	0.000288403	0.0203	#NUM!	ACE,CXCL12,EPHB3,EPHB4,EPHB6,MMP7,PFN1,RTN4R,SEMA5A,TUBA1B	Protein Ubiquitination Pathway	10.2	6.30957e-11	0.0858	#NUM!	B2M,HSP90AA1,HSPA5,HSPB1,PSMA1,PSMA3,PSMA4,PSMA5,PSMA6,PSMA7,PSMB1,PSMB2,PSMB3,PSMB4,PSMB6,PSMC4,PSMD2,SKP1,UBA1,UBE2L3,UBE2N,UBE2V1,USP14	Chondroitin Sulfate Degradation (Metazoa)	3.24	0.00057544	0.143	#NUM!	GM2A,HEXB	Synaptogenesis Signaling Pathway	9.71	1.94984e-10	0.0809	4.6	ARPC1A,ARPC2,ARPC4,ARPC5,CADM1,CALML5,CDH11,CDH19,CDH3,CDH5,CDH6,CDH8,EPHA10,EPHB2,EPHB4,EPHB6,GRB2,NRXN3,RAB5B,RAC1,RALA,RALB,RAP2B,RHOA,TLN1	Folate Transformations I	3.45	0.000354813	0.222	#NUM!	MTHFD1,SHMT1	Hepatic Fibrosis Signaling Pathway	3.43	0.000371535	0.0194	2.646	ACVR1B,CCN2,LRP1,MYL6,PGF,RAP1B,TGFBR3,TTN	p70S6K Signaling	17.4	3.98107e-18	0.0909	0.816	AGT,EEF2,IGHA1,IGHG2,IGHG3,IGHM,IGHV3-15,IGHV3-49,IGHV3-73,IGKV1-17,IGKV2-24,IGKV3-15,IGKV3-20,IGKV4-1,IGLC7,IGLV1-47,IGLV2-14,IGLV3-10,IGLV3-21,IGLV3-25,IGLV3-9,IGLV6-57,IGLV8-61,PPP2R1A,PTPA,RALB,RAP2B,YWHAE,YWHAG	BAG2 Signaling Pathway	13.5
Complement System	4.83	1.47911e-05	0.139	1	C3,C4A/C4B,C9,CFI,MASP2	Neuroprotective Role of THOP1 in Alzheimer's Disease	3.49	0.000323594	0.0446	#NUM!	ACE,AGT,DPP4,PRTN3,SERPINA3	Synaptogenesis Signaling Pathway	9.74	1.8197e-10	0.0777	4.491	ARPC1A,ARPC2,ARPC4,ARPC5,CADM1,CALML5,CDH11,CDH19,CDH3,CDH5,CDH6,CDH8,EPHA10,EPHB2,EPHB4,EPHB6,GRB2,RAB5B,RAC1,RALA,RALB,RAP2B,RHOA,TLN1	Signaling by Rho Family GTPases	3.23	0.000588844	0.0189	2.236	CDH11,CDH19,CDH3,CDH6,MYL6	Protein Ubiquitination Pathway	9.48	3.31131e-10	0.0858	#NUM!	B2M,HSP90AA1,HSPA5,HSPB1,PSMA1,PSMA3,PSMA4,PSMA5,PSMA6,PSMA7,PSMB1,PSMB2,PSMB3,PSMB4,PSMB6,PSMC4,PSMD2,SKP1,UBA1,UBE2L3,UBE2N,UBE2V1,USP14	LXR/RXR Activation	3.19	0.000645654	0.0325	2	AGT,APOA4,HPX,TF	Wound Healing Signaling Pathway	3.27	0.000537032	0.0252	2.449	ACVR1B,COL15A1,F2,PGF,RAP1B,TGFBR3	IL-15 Signaling	13.4	3.98107e-14	0.0868	#NUM!	IGHA1,IGHG2,IGHG3,IGHM,IGHV3-15,IGHV3-49,IGHV3-73,IGKV1-17,IGKV2-24,IGKV3-15,IGKV3-20,IGKV4-1,IGLC7,IGLV1-47,IGLV2-14,IGLV3-10,IGLV3-21,IGLV3-25,IGLV3-9,IGLV6-57,IGLV8-61,RALB,RAP2B	Ephrin Receptor Signaling	12.1
B Cell Development	4.57	2.69153e-05	0.0452	#NUM!	IGHM,IGHV3-73,IGHV6-1,IGKV1-17,IGKV2-24,IGKV3-20,IGKV4-1,IGLV1-51,IGLV2-18,IGLV7-43	Acute Phase Response Signaling	3.35	0.000446684	0.0326	2.236	AGT,CFB,CP,HPX,SERPINA3,SERPINF1	NRF2-mediated Oxidative Stress Response	8.89	1.28825e-09	0.09	3.464	AKR1A1,CCT7,ERP29,GSR,GSTM1,GSTM3,GSTO1,GSTP1,HMOX1,HSP90AA1,PPIB,PRDX1,RALA,RALB,RAP2B,SOD1,SOD2,USP14,VCP	Dermatan Sulfate Degradation (Metazoa)	3.17	0.000676083	0.133	#NUM!	GM2A,HEXB	NRF2-mediated Oxidative Stress Response	8.27	5.37032e-09	0.09	3.464	AKR1A1,CCT7,ERP29,GSR,GSTM1,GSTM3,GSTO1,GSTP1,HMOX1,HSP90AA1,PPIB,PRDX1,RALA,RALB,RAP2B,SOD1,SOD2,USP14,VCP	Tryptophan Degradation X (Mammalian, via Tryptamine)	2.78	0.00165959	0.105	#NUM!	ALDH1A1,DDC	WNT/β-catenin Signaling	3.09	0.000812831	0.0292	-0.447	ACVR1B,CD44,LRP1,SFRP4,TGFBR3	PI3K Signaling in B Lymphocytes	13.4	3.98107e-14	0.0769	2	C3,CALML5,IGHA1,IGHG2,IGHG3,IGHM,IGHV3-15,IGHV3-49,IGHV3-73,IGKV1-17,IGKV2-24,IGKV3-15,IGKV3-20,IGKV4-1,IGLC7,IGLV1-47,IGLV2-14,IGLV3-10,IGLV3-21,IGLV3-25,IGLV3-9,IGLV6-57,IGLV8-61,RALB,RAP2B	Clathrin-mediated Endocytosis Signaling	11.9
Sucrose Degradation V (Mammalian)	4.44	3.63078e-05	0.375	#NUM!	GALM,KHK,TKFC	Ceramide Degradation	3.24	0.00057544	0.286	#NUM!	ASAH1,NAAA	Huntington's Disease Signaling	8.38	4.16869e-09	0.0755	2	ATP5F1A,ATP5F1B,CAPN1,CAPN2,CAPNS1,DNM2,GRB2,HSPA5,PSMA1,PSMA3,PSMA4,PSMA5,PSMA6,PSMA7,PSMB1,PSMB2,PSMB3,PSMB4,PSMB6,PSMC4,PSMD2	Synaptogenesis Signaling Pathway	2.93	0.0011749	0.0162	2.236	CDH11,CDH19,CDH3,CDH6,EPHB2	Huntington's Disease Signaling	7.72	1.90546e-08	0.0755	2	ATP5F1A,ATP5F1B,CAPN1,CAPN2,CAPNS1,DNM2,GRB2,HSPA5,PSMA1,PSMA3,PSMA4,PSMA5,PSMA6,PSMA7,PSMB1,PSMB2,PSMB3,PSMB4,PSMB6,PSMC4,PSMD2	Hepatic Fibrosis / Hepatic Stellate Cell Activation	2.49	0.00323594	0.0211	#NUM!	AGT,COL15A1,COL6A1,MYL6	Gα12/13 Signaling	2.6	0.00251189	0.0301	1	CDH19,F2,MYL6,RAP1B	FcγRIIB Signaling in B Lymphocytes	13.2	6.30957e-14	0.0846	#NUM!	IGHA1,IGHG2,IGHG3,IGHM,IGHV3-15,IGHV3-49,IGHV3-73,IGKV1-17,IGKV2-24,IGKV3-15,IGKV3-20,IGKV4-1,IGLC7,IGLV1-47,IGLV2-14,IGLV3-10,IGLV3-21,IGLV3-25,IGLV3-9,IGLV6-57,IGLV8-61,RALB,RAP2B	Integrin Signaling	10.2
Superoxide Radicals Degradation	4.44	3.63078e-05	0.375	#NUM!	CAT,SOD2,SOD3	Ephrin B Signaling	3.24	0.00057544	0.0556	2	CXCL12,EPHB3,EPHB4,EPHB6	Inhibition of ARE-Mediated mRNA Degradation Pathway	8.23	5.88844e-09	0.1	#NUM!	PPP2R1A,PSMA1,PSMA3,PSMA4,PSMA5,PSMA6,PSMA7,PSMB1,PSMB2,PSMB3,PSMB4,PSMB6,PSMC4,PSMD2,YWHAB,YWHAZ	Oncostatin M Signaling	2.26	0.00549541	0.0465	#NUM!	IL6ST,OSMR	Inhibition of ARE-Mediated mRNA Degradation Pathway	7.7	1.99526e-08	0.1	#NUM!	PPP2R1A,PSMA1,PSMA3,PSMA4,PSMA5,PSMA6,PSMA7,PSMB1,PSMB2,PSMB3,PSMB4,PSMB6,PSMC4,PSMD2,YWHAB,YWHAZ	Ethanol Degradation II	2.44	0.00363078	0.0714	#NUM!	ADH5,ALDH1A1	Pulmonary Fibrosis Idiopathic Signaling Pathway	2.6	0.00251189	0.0186	2.449	ACVR1B,CCN2,COL15A1,F2,RAP1B,TGFBR3	B Cell Development	13.1	7.94328e-14	0.095	#NUM!	IGHA1,IGHG2,IGHG3,IGHM,IGHV3-15,IGHV3-49,IGHV3-73,IGKV1-17,IGKV2-24,IGKV3-15,IGKV3-20,IGKV4-1,IGLC7,IGLV1-47,IGLV2-14,IGLV3-10,IGLV3-21,IGLV3-25,IGLV3-9,IGLV6-57,IGLV8-61	IL-8 Signaling	10.2
Neuroprotective Role of THOP1 in Alzheimer's Disease	4.22	6.0256e-05	0.0625	1.342	ACE,AGT,F11,PLG,PRSS27,SERPINA3,ST14	CLEAR Signaling Pathway	3.13	0.00074131	0.0249	1.89	ASAH1,CTSA,CTSD,GLB1,HEXB,NAGLU,YWHAZ	Epithelial Adherens Junction Signaling	7.52	3.01995e-08	0.0962	1.291	ARPC1A,ARPC2,ARPC4,ARPC5,CTNNA1,IQGAP1,PPP2R1A,RAC1,RALA,RALB,RAP2B,RHOA,VCL,YWHAB,YWHAZ	SPINK1 Pancreatic Cancer Pathway	2.05	0.00891251	0.0364	#NUM!	CPM,CTSA	Epithelial Adherens Junction Signaling	7.03	9.33254e-08	0.0962	1.291	ARPC1A,ARPC2,ARPC4,ARPC5,CTNNA1,IQGAP1,PPP2R1A,RAC1,RALA,RALB,RAP2B,RHOA,VCL,YWHAB,YWHAZ	Noradrenaline and Adrenaline Degradation	2.38	0.00416869	0.0667	#NUM!	ADH5,ALDH1A1	MSP-RON Signaling In Cancer Cells Pathway	2.53	0.00295121	0.0288	2	FLNA,PGF,RAP1B,YWHAB	B Cell Receptor Signaling	13	1e-13	0.0707	2	CALML5,CFL1,IGHA1,IGHG2,IGHG3,IGHM,IGHV3-15,IGHV3-49,IGHV3-73,IGKV1-17,IGKV2-24,IGKV3-15,IGKV3-20,IGKV4-1,IGLC7,IGLV1-47,IGLV2-14,IGLV3-10,IGLV3-21,IGLV3-25,IGLV3-9,IGLV6-57,IGLV8-61,JCHAIN,RALB,RAP2B	Remodeling of Epithelial Adherens Junctions	10.1
L-cysteine Degradation III	4.12	7.58578e-05	1	#NUM!	GOT1,MPST	Role of JAK family kinases in IL-6-type Cytokine Signaling	3.13	0.00074131	0.0519	2	SERPINA3,SERPINA5,SERPINA6,SERPINA7	Integrin Signaling	7.48	3.31131e-08	0.0829	4.123	ACTN1,ACTN4,ARPC1A,ARPC2,ARPC4,ARPC5,CAPN1,CAPN2,CAPNS1,GRB2,RAC1,RALA,RALB,RAP2B,RHOA,TLN1,VCL	Role of JAK2 in Hormone-like Cytokine Signaling	2.01	0.00977237	0.0345	#NUM!	SCGB1A1,SIRPA	Integrin Signaling	6.94	1.14815e-07	0.0829	4.123	ACTN1,ACTN4,ARPC1A,ARPC2,ARPC4,ARPC5,CAPN1,CAPN2,CAPNS1,GRB2,RAC1,RALA,RALB,RAP2B,RHOA,TLN1,VCL	Formaldehyde Oxidation II (Glutathione-dependent)	2.2	0.00630957	0.5	#NUM!	ADH5	Actin Cytoskeleton Signaling	2.45	0.00354813	0.0208	#NUM!	F2,FLNA,MYL6,RAP1B,TTN	Coagulation System	11.4	3.98107e-12	0.286	1.265	A2M,F10,F12,FGA,FGB,FGG,KLKB1,PLAU,PROS1,SERPINA1	Coagulation System	9.62
IL-15 Signaling	3.91	0.000123027	0.0377	#NUM!	IGHM,IGHV3-73,IGHV6-1,IGKV1-17,IGKV2-24,IGKV3-20,IGKV4-1,IGLV1-51,IGLV2-18,IGLV7-43	Complement System	3.04	0.000912011	0.0833	#NUM!	CFB,CFI,MASP2	Acute Phase Response Signaling	7.36	4.36516e-08	0.087	3.317	A2M,APCS,C4A/C4B,CP,FGA,GRB2,HMOX1,HPX,IL36A,ORM1,ORM2,RALA,RALB,RAP2B,RBP5,SOD2	Lactose Degradation III	1.99	0.0102329	0.25	#NUM!	GLB1	Acute Phase Response Signaling	6.85	1.41254e-07	0.087	3.317	A2M,APCS,C4A/C4B,CP,FGA,GRB2,HMOX1,HPX,IL36A,ORM1,ORM2,RALA,RALB,RAP2B,RBP5,SOD2	Glycine Biosynthesis I	2.2	0.00630957	0.5	#NUM!	SHMT1	Factors Promoting Cardiogenesis in Vertebrates	2.43	0.00371535	0.0268	#NUM!	ACVR1B,CAMK2D,LRP1,TGFBR3	Complement System	9.74	1.8197e-10	0.25	1.414	C1R,C1S,C3,C4A/C4B,C4BPA,C5,C9,CFI,MASP2	fMLP Signaling in Neutrophils	9.14
p70S6K Signaling	3.9	0.000125893	0.0345	#NUM!	AGT,IGHM,IGHV3-73,IGHV6-1,IGKV1-17,IGKV2-24,IGKV3-20,IGKV4-1,IGLV1-51,IGLV2-18,IGLV7-43	Sphingosine and Sphingosine-1-phosphate Metabolism	3.01	0.000977237	0.222	#NUM!	ASAH1,NAAA	Regulation of Cellular Mechanics by Calpain Protease	6.83	1.47911e-07	0.125	2.646	ACTN1,ACTN4,CAPN1,CAPN2,CAPNS1,GRB2,RALA,RALB,RAP2B,TLN1,VCL	Hepatic Fibrosis / Hepatic Stellate Cell Activation	1.89	0.0128825	0.0158	#NUM!	IFNAR2,MYL6,VCAM1	Regulation of Cellular Mechanics by Calpain Protease	6.46	3.46737e-07	0.125	2.646	ACTN1,ACTN4,CAPN1,CAPN2,CAPNS1,GRB2,RALA,RALB,RAP2B,TLN1,VCL	Ferroptosis Signaling Pathway	2.11	0.00776247	0.0236	#NUM!	HSPB1,SLC3A2,TF	Dilated Cardiomyopathy Signaling Pathway	2.42	0.00380189	0.0267	0	CAMK2D,DSC2,MYL6,TTN	Protein Ubiquitination Pathway	9.65	2.23872e-10	0.0709	#NUM!	HSP90AA1,HSP90AB1,HSPA8,PSMA1,PSMA3,PSMA6,PSMA7,PSMB1,PSMB6,PSMC4,PSMD2,PSMD9,SKP1,UBA1,UBE2L3,UBE2N,UBE2V1,USP14,USP5	Regulation of Cellular Mechanics by Calpain Protease	8.48
PI3K Signaling in B Lymphocytes	3.83	0.000147911	0.0338	#NUM!	C3,IGHM,IGHV3-73,IGHV6-1,IGKV1-17,IGKV2-24,IGKV3-20,IGKV4-1,IGLV1-51,IGLV2-18,IGLV7-43	Pulmonary Fibrosis Idiopathic Signaling Pathway	2.79	0.00162181	0.0217	2.449	ACTG1,COL15A1,CXCL12,EPHB3,EPHB4,MMP7,PLAU	Germ Cell-Sertoli Cell Junction Signaling	6.35	4.46684e-07	0.0843	#NUM!	A2M,ACTN1,ACTN4,CTNNA1,IQGAP1,JUP,RAC1,RALA,RALB,RAP2B,RHOA,TUBA1B,TUBB4B,VCL	Agranulocyte Adhesion and Diapedesis	1.87	0.0134896	0.0155	#NUM!	MADCAM1,MYL6,VCAM1	Glucocorticoid Receptor Signaling	6	1e-06	0.0498	#NUM!	A2M,ANXA1,ATP5F1A,ATP5F1B,B2M,GRB2,HSP90AA1,HSPA5,KRT1,KRT10,KRT13,KRT14,KRT16,KRT19,KRT2,KRT5,KRT6A,KRT6C,KRT7,KRT8,KRT80,KRT9,PLAU,RAC1,RALA,RALB,RAP2B	Serotonin Receptor Signaling	2.06	0.00870964	0.0455	#NUM!	DDC,PCBD1	Glutamate Removal from Folates	2.37	0.0042658	1	#NUM!	GGH	Systemic Lupus Erythematosus In B Cell Signaling Pathway	9.47	3.38844e-10	0.0532	2.236	CALML5,IGHA1,IGHG2,IGHG3,IGHM,IGHV3-15,IGHV3-49,IGHV3-73,IGKV1-17,IGKV2-24,IGKV3-15,IGKV3-20,IGKV4-1,IGLC7,IGLV1-47,IGLV2-14,IGLV3-10,IGLV3-21,IGLV3-25,IGLV3-9,IGLV6-57,IGLV8-61,RALB,RAP2B	Actin Nucleation by ARP-WASP Complex	8.3
FcγRIIB Signaling in B Lymphocytes	3.82	0.000151356	0.0368	#NUM!	IGHM,IGHV3-73,IGHV6-1,IGKV1-17,IGKV2-24,IGKV3-20,IGKV4-1,IGLV1-51,IGLV2-18,IGLV7-43	γ-glutamyl Cycle	2.68	0.0020893	0.154	#NUM!	ANPEP,GGT6	Glucocorticoid Receptor Signaling	6.2	6.30957e-07	0.048	#NUM!	A2M,ANXA1,ATP5F1A,ATP5F1B,B2M,GRB2,HSP90AA1,HSPA5,KRT1,KRT10,KRT13,KRT14,KRT16,KRT19,KRT2,KRT5,KRT6A,KRT6C,KRT7,KRT8,KRT9,PLAU,RAC1,RALA,RALB,RAP2B	Role of JAK family kinases in IL-6-type Cytokine Signaling	1.77	0.0169824	0.026	#NUM!	IL6ST,OSMR	Germ Cell-Sertoli Cell Junction Signaling	5.91	1.23027e-06	0.0843	#NUM!	A2M,ACTN1,ACTN4,CTNNA1,IQGAP1,JUP,RAC1,RALA,RALB,RAP2B,RHOA,TUBA1B,TUBB4B,VCL	Gα12/13 Signaling	2.05	0.00891251	0.0226	#NUM!	CDH16,CDH19,MYL6	Vitamin-C Transport	2.37	0.0042658	0.087	#NUM!	GSTO1,TXN	FAT10 Signaling Pathway	9.38	4.16869e-10	0.185	#NUM!	PSMA1,PSMA3,PSMA6,PSMA7,PSMB1,PSMB6,PSMC4,PSMD2,PSMD9,UBA1	G Beta Gamma Signaling	8.22
Pyrimidine Ribonucleotides Interconversion	3.57	0.000269153	0.111	2	AK1,CANT1,NME2,PCK1	LXR/RXR Activation	2.38	0.00416869	0.0325	1	AGT,CD14,HPX,SERPINF1	Ephrin Receptor Signaling	6.08	8.31764e-07	0.0746	2.714	ACP1,ARPC1A,ARPC2,ARPC4,ARPC5,EPHA10,EPHB2,EPHB4,EPHB6,GRB2,RAC1,RALA,RALB,RAP2B,RHOA	Systemic Lupus Erythematosus In B Cell Signaling Pathway	1.54	0.0288403	0.00887	#NUM!	IFNAR2,IGHV3-49,IGLV2-18,IL6ST	Ephrin Receptor Signaling	5.62	2.39883e-06	0.0746	2.714	ACP1,ARPC1A,ARPC2,ARPC4,ARPC5,EPHA10,EPHB2,EPHB4,EPHB6,GRB2,RAC1,RALA,RALB,RAP2B,RHOA	D-glucuronate Degradation I	2.02	0.00954993	0.333	#NUM!	CRYL1	Epithelial Adherens Junction Signaling	2.36	0.00436516	0.0256	0	ACVR1B,RAP1B,TGFBR3,YWHAB	IL-12 Signaling and Production in Macrophages	9	1e-09	0.0742	-4.123	APOA1,APOA2,APOA4,APOB,APOC1,APOC3,APOD,APOE,C3,CALML5,IGHG2,IGHG3,IGHM,JCHAIN,ORM2,PON1,SERPINA1	NRF2-mediated Oxidative Stress Response	7.58
Pyrimidine Ribonucleotides De Novo Biosynthesis	3.43	0.000371535	0.103	2	AK1,CANT1,NME2,PCK1	Neutrophil Extracellular Trap Signaling Pathway	2.29	0.00512861	0.0177	1.134	CD14,COL15A1,DNASE1,ELANE,JCHAIN,MPO,PRTN3	Actin Cytoskeleton Signaling	5.8	1.58489e-06	0.0667	3.5	ACTN1,ACTN4,ARPC1A,ARPC2,ARPC4,ARPC5,GRB2,IQGAP1,MYL6,RAC1,RALA,RALB,RAP2B,RHOA,TLN1,VCL	Regulation of Actin-based Motility by Rho	1.49	0.0323594	0.0182	#NUM!	GSN,MYL6	Actin Nucleation by ARP-WASP Complex	5.4	3.98107e-06	0.11	3	ARPC1A,ARPC2,ARPC4,ARPC5,GRB2,RAC1,RALA,RALB,RAP2B,RHOA	Tyrosine Biosynthesis IV	2.02	0.00954993	0.333	#NUM!	PCBD1	HIPPO signaling	2.25	0.00562341	0.0353	#NUM!	CD44,FAT4,YWHAB	Clathrin-mediated Endocytosis Signaling	8.78	1.65959e-09	0.0777	#NUM!	ACTG1,APOA1,APOA2,APOA4,APOB,APOC1,APOC3,APOD,APOE,DNM2,HSPA8,MYO6,ORM2,PON1,SERPINA1,TF	GNRH Signaling	7.56
Tryptophan Degradation X (Mammalian, via Tryptamine)	3.24	0.00057544	0.158	#NUM!	ALDH1A1,ALDH9A1,DDC	Melatonin Degradation III	2.28	0.00524807	1	#NUM!	MPO	Actin Nucleation by ARP-WASP Complex	5.74	1.8197e-06	0.11	3	ARPC1A,ARPC2,ARPC4,ARPC5,GRB2,RAC1,RALA,RALB,RAP2B,RHOA	IL-15 Production	1.42	0.0380189	0.0167	#NUM!	AXL,EPHB2	Actin Cytoskeleton Signaling	5.31	4.89779e-06	0.0667	3.5	ACTN1,ACTN4,ARPC1A,ARPC2,ARPC4,ARPC5,GRB2,IQGAP1,MYL6,RAC1,RALA,RALB,RAP2B,RHOA,TLN1,VCL	Aryl Hydrocarbon Receptor Signaling	1.93	0.011749	0.0204	#NUM!	ALDH1A1,ALDH1L1,HSPB1	Glutathione-mediated Detoxification	2.23	0.00588844	0.0741	#NUM!	GGH,GSTO1	BAG2 Signaling Pathway	8.75	1.77828e-09	0.136	#NUM!	HSP90AA1,HSPA8,PSMA1,PSMA3,PSMA6,PSMA7,PSMB1,PSMB6,PSMC4,PSMD2,PSMD9	CXCR4 Signaling	7.54
Role of JAK family kinases in IL-6-type Cytokine Signaling	3.23	0.000588844	0.0649	2.236	SERPINA1,SERPINA3,SERPINA4,SERPINA6,SERPINA7	Glutathione Redox Reactions I	2.15	0.00707946	0.0833	#NUM!	GPX3,GSTP1	RHOGDI Signaling	5.64	2.29087e-06	0.0688	-3.357	ARHGAP1,ARHGDIB,ARPC1A,ARPC2,ARPC4,ARPC5,CDH11,CDH19,CDH3,CDH5,CDH6,CDH8,MYL6,RAC1,RHOA	Atherosclerosis Signaling	1.37	0.042658	0.0156	#NUM!	APOD,VCAM1	MSP-RON Signaling In Cancer Cells Pathway	5.25	5.62341e-06	0.0863	3.464	F11,GRB2,KLK10,KLK11,KLK13,KLK6,RALA,RALB,RAP2B,ST14,YWHAB,YWHAZ	CLEAR Signaling Pathway	1.9	0.0125893	0.0142	1	NAGLU,NEU1,SGSH,YWHAB	Tumor Microenvironment Pathway	2.15	0.00707946	0.0225	2	CD44,CSPG4,PGF,RAP1B	Atherosclerosis Signaling	8.65	2.23872e-09	0.102	#NUM!	APOA1,APOA2,APOA4,APOB,APOC1,APOC3,APOD,APOE,CXCL12,ORM2,PON1,PRDX6,SERPINA1	Leukocyte Extravasation Signaling	7.53
Ethanol Degradation IV	3.17	0.000676083	0.15	#NUM!	ALDH1A1,ALDH9A1,CAT	Glutathione-mediated Detoxification	2.05	0.00891251	0.0741	#NUM!	ANPEP,GSTP1	Gα12/13 Signaling	5.03	9.33254e-06	0.0827	-0.302	CDH11,CDH19,CDH3,CDH5,CDH6,CDH8,MYL6,RALA,RALB,RAP2B,RHOA							Intrinsic Prothrombin Activation Pathway	5.23	5.88844e-06	0.171	2.646	F10,F11,FGA,KLK10,KLK11,KLK13,KLK6	Catecholamine Biosynthesis	1.9	0.0125893	0.25	#NUM!	DDC	Phagosome Formation	2.12	0.00758578	0.0119	2.828	ADGRG2,C3AR1,FCGR2A,GPRC5B,MYL6,PLD3,RAP1B,TTN	Systemic Lupus Erythematosus Signaling	8.47	3.38844e-09	0.044	#NUM!	C5,C9,IGHA1,IGHG2,IGHG3,IGHM,IGHV3-15,IGHV3-49,IGHV3-73,IGKV1-17,IGKV2-24,IGKV3-15,IGKV3-20,IGKV4-1,IGLC7,IGLV1-47,IGLV2-14,IGLV3-10,IGLV3-21,IGLV3-25,IGLV3-9,IGLV6-57,IGLV8-61,JCHAIN,RALB,RAP2B	Glioma Invasiveness Signaling	7.49
Pyruvate Fermentation to Lactate	3.12	0.000758578	0.4	#NUM!	LDHA,LDHB	L-cysteine Degradation III	1.97	0.0107152	0.5	#NUM!	MPST	MSP-RON Signaling In Cancer Cells Pathway	4.85	1.41254e-05	0.0791	3.317	F11,GRB2,KLK10,KLK13,KLK6,RALA,RALB,RAP2B,ST14,YWHAB,YWHAZ							RHOGDI Signaling	5.18	6.60693e-06	0.0688	-3.357	ARHGAP1,ARHGDIB,ARPC1A,ARPC2,ARPC4,ARPC5,CDH11,CDH19,CDH3,CDH5,CDH6,CDH8,MYL6,RAC1,RHOA	Phenylalanine Degradation I (Aerobic)	1.9	0.0125893	0.25	#NUM!	PCBD1	Glycine Biosynthesis I	2.07	0.00851138	0.5	#NUM!	SHMT1	Production of Nitric Oxide and Reactive Oxygen Species in Macrophages	8.42	3.80189e-09	0.0798	1.807	APOA1,APOA2,APOA4,APOB,APOC1,APOC3,APOD,APOE,CAT,ORM2,PON1,PPP1R7,PPP2R1A,PTPA,SERPINA1	Colorectal Cancer Metastasis Signaling	7.48
Rapoport-Luebering Glycolytic Shunt	3.12	0.000758578	0.4	#NUM!	BPGM,PGAM1	Thyroid Hormone Biosynthesis	1.97	0.0107152	0.5	#NUM!	CTSD	Chaperone Mediated Autophagy Signaling Pathway	4.64	2.29087e-05	0.0461	-1.789	ATP6V1B2,EIF4A1,EPS8,HSP90AA1,HSPA5,KLK6,PSMA1,PSMA3,PSMA4,PSMA5,PSMA6,PSMA7,PSMB1,PSMB2,PSMB3,PSMB4,PSMB6,PYCARD,RAB11B,RAC1							Gα12/13 Signaling	4.69	2.04174e-05	0.0827	-0.302	CDH11,CDH19,CDH3,CDH5,CDH6,CDH8,MYL6,RALA,RALB,RAP2B,RHOA	Serotonin Degradation	1.84	0.0144544	0.0351	#NUM!	ADH5,ALDH1A1	Hepatic Fibrosis / Hepatic Stellate Cell Activation	2.06	0.00870964	0.0211	#NUM!	CCN2,COL15A1,MYL6,PGF	Extrinsic Prothrombin Activation Pathway	7.86	1.38038e-08	0.375	#NUM!	F10,F12,FGA,FGB,FGG,PROS1	Ephrin B Signaling	7.42
Sirtuin Signaling Pathway	3.02	0.000954993	0.0316	1.134	BPGM,LDHA,LDHB,PCK1,PGAM1,SOD2,SOD3,VDAC1,VDAC2	Coagulation System	1.83	0.0147911	0.0571	#NUM!	PLAU,SERPINA5	Clathrin-mediated Endocytosis Signaling	4.57	2.69153e-05	0.0631	#NUM!	ARPC1A,ARPC2,ARPC4,ARPC5,DNM2,EPHB2,GRB2,ORM1,ORM2,RAB11B,RAB5B,RAC1,S100A8							MSP-RON Signaling In Macrophages Pathway	4.47	3.38844e-05	0.0862	3.162	F11,GRB2,KLK10,KLK11,KLK13,KLK6,RALA,RALB,RAP2B,ST14	Superpathway of Serine and Glycine Biosynthesis I	1.8	0.0158489	0.2	#NUM!	SHMT1	ILK Signaling	2.01	0.00977237	0.0204	#NUM!	DSP,FLNA,MYL6,PGF	Communication between Innate and Adaptive Immune Cells	7.81	1.54882e-08	0.0474	#NUM!	IGHA1,IGHG2,IGHG3,IGHM,IGHV3-15,IGHV3-49,IGHV3-73,IGKV1-17,IGKV2-24,IGKV3-15,IGKV3-20,IGKV4-1,IGLC7,IGLV1-47,IGLV2-14,IGLV3-10,IGLV3-21,IGLV3-25,IGLV3-9,IGLV6-57,IGLV8-61,JCHAIN	Thrombin Signaling	7.3
Pyrimidine Deoxyribonucleotides De Novo Biosynthesis I	2.99	0.00102329	0.13	#NUM!	AK1,NME2,PCK1	Tumor Microenvironment Pathway	1.83	0.0147911	0.0225	2	CSPG4,CXCL12,MMP7,PLAU	FXR/RXR Activation	4.5	3.16228e-05	0.08	#NUM!	C4A/C4B,FASN,FGA,FGFR4,HPX,IL36A,ORM1,ORM2,PKLR,VTN							Glutathione Redox Reactions I	4.31	4.89779e-05	0.208	2.236	GPX1,GSR,GSTM1,GSTP1,PRDX6	Tetrahydrofolate Salvage from 5,10-methenyltetrahydrofolate	1.8	0.0158489	0.2	#NUM!	MTHFD1	IGF-1 Signaling	2	0.01	0.0286	#NUM!	CCN2,RAP1B,YWHAB	Phospholipase C Signaling	7.65	2.23872e-08	0.0401	1.633	CALML5,IGHA1,IGHG2,IGHG3,IGHM,IGHV3-15,IGHV3-49,IGHV3-73,IGKV1-17,IGKV2-24,IGKV3-15,IGKV3-20,IGKV4-1,IGLC7,IGLV1-47,IGLV2-14,IGLV3-10,IGLV3-21,IGLV3-25,IGLV3-9,IGLV6-57,IGLV8-61,JCHAIN,RALB,RAP2B,TGM2	Macropinocytosis Signaling	7.17
Iron homeostasis signaling pathway	2.96	0.00109648	0.0455	#NUM!	CP,EGF,HBB,HP,HPX,TF	Methionine Salvage II (Mammalian)	1.8	0.0158489	0.333	#NUM!	BHMT	Glutathione Redox Reactions I	4.49	3.23594e-05	0.208	2.236	GPX1,GSR,GSTM1,GSTP1,PRDX6							FXR/RXR Activation	4.19	6.45654e-05	0.08	#NUM!	C4A/C4B,FASN,FGA,FGFR4,HPX,IL36A,ORM1,ORM2,PKLR,VTN	Serotonin and Melatonin Biosynthesis	1.8	0.0158489	0.2	#NUM!	DDC	Antioxidant Action of Vitamin C	1.95	0.0112202	0.0275	#NUM!	GSTO1,PLD3,TXN	Role of NFAT in Regulation of the Immune Response	7.49	3.23594e-08	0.0421	#NUM!	CALML5,IGHA1,IGHG2,IGHG3,IGHM,IGHV3-15,IGHV3-49,IGHV3-73,IGKV1-17,IGKV2-24,IGKV3-15,IGKV3-20,IGKV4-1,IGLC7,IGLV1-47,IGLV2-14,IGLV3-10,IGLV3-21,IGLV3-25,IGLV3-9,IGLV6-57,IGLV8-61,RALB,RAP2B	Chemokine Signaling	7.11
Glycolysis I	2.93	0.0011749	0.125	#NUM!	BPGM,GAPDHS,PGAM1	Anandamide Degradation	1.8	0.0158489	0.333	#NUM!	NAAA	Intrinsic Prothrombin Activation Pathway	4.37	4.2658e-05	0.146	2.449	F10,F11,FGA,KLK10,KLK13,KLK6							Clathrin-mediated Endocytosis Signaling	4.18	6.60693e-05	0.0631	#NUM!	ARPC1A,ARPC2,ARPC4,ARPC5,DNM2,EPHB2,GRB2,ORM1,ORM2,RAB11B,RAB5B,RAC1,S100A8	Citrulline-Nitric Oxide Cycle	1.8	0.0158489	0.2	#NUM!	ASS1	Docosahexaenoic Acid (DHA) Signaling	1.95	0.0112202	0.0526	#NUM!	APP,CYCS	Inhibition of ARE-Mediated mRNA Degradation Pathway	7.47	3.38844e-08	0.0813	0	PPP2R1A,PSMA1,PSMA3,PSMA6,PSMA7,PSMB1,PSMB6,PSMC4,PSMD2,PSMD9,PTPA,YWHAE,YWHAG	Role of Tissue Factor in Cancer	7.05
FAT10 Signaling Pathway	2.89	0.00128825	0.0741	#NUM!	PSMA7,PSMB4,PSMB5,PSMB6	Thiosulfate Disproportionation III (Rhodanese)	1.8	0.0158489	0.333	#NUM!	MPST	Paxillin Signaling	4.31	4.89779e-05	0.0849	3	ACTN1,ACTN4,GRB2,RAC1,RALA,RALB,RAP2B,TLN1,VCL							Chaperone Mediated Autophagy Signaling Pathway	4.12	7.58578e-05	0.0461	-1.789	ATP6V1B2,EIF4A1,EPS8,HSP90AA1,HSPA5,KLK6,PSMA1,PSMA3,PSMA4,PSMA5,PSMA6,PSMA7,PSMB1,PSMB2,PSMB3,PSMB4,PSMB6,PYCARD,RAB11B,RAC1	dTMP De Novo Biosynthesis	1.8	0.0158489	0.2	#NUM!	SHMT1	Role of Macrophages, Fibroblasts and Endothelial Cells in Rheumatoid Arthritis	1.94	0.0114815	0.0157	#NUM!	CAMK2D,LRP1,PGF,RAP1B,SFRP4	Altered T Cell and B Cell Signaling in Rheumatoid Arthritis	7.01	9.77237e-08	0.0445	#NUM!	IGHA1,IGHG2,IGHG3,IGHM,IGHV3-15,IGHV3-49,IGHV3-73,IGKV1-17,IGKV2-24,IGKV3-15,IGKV3-20,IGKV4-1,IGLC7,IGLV1-47,IGLV2-14,IGLV3-10,IGLV3-21,IGLV3-25,IGLV3-9,IGLV6-57,IGLV8-61	HIF1α Signaling	7.04
Gluconeogenesis I	2.88	0.00131826	0.12	#NUM!	BPGM,GAPDHS,PGAM1	Coronavirus Replication Pathway	1.68	0.020893	0.0476	#NUM!	ACE,TUBA1B	RAC Signaling	4.16	6.91831e-05	0.073	3.162	ARPC1A,ARPC2,ARPC4,ARPC5,IQGAP1,RAC1,RALA,RALB,RAP2B,RHOA							Paxillin Signaling	4.02	9.54993e-05	0.0849	3	ACTN1,ACTN4,GRB2,RAC1,RALA,RALB,RAP2B,TLN1,VCL	Xenobiotic Metabolism CAR Signaling Pathway	1.75	0.0177828	0.0174	#NUM!	ALDH1A1,ALDH1L1,SOD3	NRF2-mediated Oxidative Stress Response	1.9	0.0125893	0.019	#NUM!	AOX1,GSTO1,RAP1B,TXN	NRF2-mediated Oxidative Stress Response	6.89	1.28825e-07	0.0664	3	ACTG1,CAT,CBR1,CCT7,GSR,HSP90AA1,HSP90AB1,PRDX1,RALB,RAP2B,SOD1,SOD3,USP14,VCP	Glycolysis I	6.96
B Cell Receptor Signaling	2.8	0.00158489	0.0272	#NUM!	IGHM,IGHV3-73,IGHV6-1,IGKV1-17,IGKV2-24,IGKV3-20,IGKV4-1,IGLV1-51,IGLV2-18,IGLV7-43	Pentose Phosphate Pathway (Oxidative Branch)	1.68	0.020893	0.25	#NUM!	PGLS	Signaling by Rho Family GTPases	4.03	9.33254e-05	0.0528	3.742	ARPC1A,ARPC2,ARPC4,ARPC5,CDH11,CDH19,CDH3,CDH5,CDH6,CDH8,IQGAP1,MYL6,RAC1,RHOA							RAC Signaling	3.85	0.000141254	0.073	3.162	ARPC1A,ARPC2,ARPC4,ARPC5,IQGAP1,RAC1,RALA,RALB,RAP2B,RHOA	Arginine Biosynthesis IV	1.72	0.0190546	0.167	#NUM!	ASS1	Glutathione Biosynthesis	1.9	0.0125893	0.333	#NUM!	GSS	Maturity Onset Diabetes of Young (MODY) Signaling	6.69	2.04174e-07	0.117	#NUM!	APOA1,APOA2,APOA4,APOB,APOC1,APOC3,APOD,APOE,GAPDH	Inhibition of ARE-Mediated mRNA Degradation Pathway	6.95
Phospholipases	2.62	0.00239883	0.0625	#NUM!	LCAT,PLA2G15,PLD3,PRDX6	Lactose Degradation III	1.68	0.020893	0.25	#NUM!	GLB1	Sertoli Cell-Sertoli Cell Junction Signaling	4.01	9.77237e-05	0.0594	#NUM!	A2M,ACTN1,ACTN4,CTNNA1,JUP,RAC1,RALA,RALB,RAP2B,TUBA1B,TUBB4B,VCL							Fcγ Receptor-mediated Phagocytosis in Macrophages and Monocytes	3.68	0.00020893	0.086	2.828	ARPC1A,ARPC2,ARPC4,ARPC5,HMOX1,RAB11B,RAC1,TLN1	Urea Cycle	1.72	0.0190546	0.167	#NUM!	ASS1	Ascorbate Recycling (Cytosolic)	1.9	0.0125893	0.333	#NUM!	GSTO1	Glycolysis I	6.66	2.18776e-07	0.25	2.449	ALDOA,BPGM,GAPDH,PFKL,PGAM1,PGK1	Gαi Signaling	6.87
Eicosanoid Signaling	2.54	0.00288403	0.0597	#NUM!	AKR1C3,GGT1,LCAT,PRDX6	Airway Pathology in Chronic Obstructive Pulmonary Disease	1.65	0.0223872	0.0265	#NUM!	ELANE,MPO,PRTN3	MSP-RON Signaling In Macrophages Pathway	4	0.0001	0.0776	3	F11,GRB2,KLK10,KLK13,KLK6,RALA,RALB,RAP2B,ST14							Sertoli Cell-Sertoli Cell Junction Signaling	3.66	0.000218776	0.0594	#NUM!	A2M,ACTN1,ACTN4,CTNNA1,JUP,RAC1,RALA,RALB,RAP2B,TUBA1B,TUBB4B,VCL	Role of JAK family kinases in IL-6-type Cytokine Signaling	1.6	0.0251189	0.026	#NUM!	SERPINA3,SERPINA6	D-glucuronate Degradation I	1.9	0.0125893	0.333	#NUM!	CRYL1	Intrinsic Prothrombin Activation Pathway	6.47	3.38844e-07	0.171	1.89	F10,F12,FGA,FGB,FGG,KLKB1,PROS1	Chaperone Mediated Autophagy Signaling Pathway	6.84
Xenobiotic Metabolism AHR Signaling Pathway	2.29	0.00512861	0.0506	2	ALDH1A1,ALDH9A1,GSTA2,PON1	Ephrin Receptor Signaling	1.65	0.0223872	0.0199	#NUM!	CXCL12,EPHB3,EPHB4,EPHB6	Fcγ Receptor-mediated Phagocytosis in Macrophages and Monocytes	3.93	0.00011749	0.086	2.828	ARPC1A,ARPC2,ARPC4,ARPC5,HMOX1,RAB11B,RAC1,TLN1							Glioma Invasiveness Signaling	3.65	0.000223872	0.0986	2.449	PLAU,RAC1,RALA,RALB,RAP2B,RHOA,VTN	Histidine Degradation III	1.6	0.0251189	0.125	#NUM!	MTHFD1	Tyrosine Biosynthesis IV	1.9	0.0125893	0.333	#NUM!	PCBD1	Role of JAK family kinases in IL-6-type Cytokine Signaling	5.61	2.45471e-06	0.104	2.828	CRP,HSP90AA1,HSP90AB1,LBP,SERPINA1,SERPINA3,SERPINA4,SERPINA6	Actin Cytoskeleton Signaling	6.73
Atherosclerosis Signaling	2.26	0.00549541	0.0391	#NUM!	ICAM1,LCAT,PON1,PRDX6,SERPINA1	Synaptogenesis Signaling Pathway	1.61	0.0245471	0.0162	2.236	CDH11,CDH16,EPHB3,EPHB4,EPHB6	Phagosome Maturation	3.88	0.000131826	0.0676	#NUM!	ATP6V1B2,B2M,CALR,PRDX1,PRDX2,PRDX6,RAB5B,RAC1,TUBA1B,TUBB4B							Signaling by Rho Family GTPases	3.64	0.000229087	0.0528	3.742	ARPC1A,ARPC2,ARPC4,ARPC5,CDH11,CDH19,CDH3,CDH5,CDH6,CDH8,IQGAP1,MYL6,RAC1,RHOA	Superoxide Radicals Degradation	1.6	0.0251189	0.125	#NUM!	SOD3	Role of Tissue Factor in Cancer	1.89	0.0128825	0.0261	#NUM!	CCN2,F2,RAP1B	Gluconeogenesis I	5.12	7.58578e-06	0.2	2.236	ALDOA,BPGM,GAPDH,PGAM1,PGK1	Agrin Interactions at Neuromuscular Junction	6.64
Intrinsic Prothrombin Activation Pathway	2.26	0.00549541	0.0732	#NUM!	F11,FGG,SERPINC1	NRF2-mediated Oxidative Stress Response	1.59	0.025704	0.019	#NUM!	ACTG1,CBR1,GSTP1,SOD3	Glioma Invasiveness Signaling	3.88	0.000131826	0.0986	2.449	PLAU,RAC1,RALA,RALB,RAP2B,RHOA,VTN							Ephrin B Signaling	3.61	0.000245471	0.0972	1.134	ACP1,CAP1,EPHB2,EPHB4,EPHB6,RAC1,RHOA	Dopamine Receptor Signaling	1.58	0.0263027	0.0253	#NUM!	DDC,PCBD1	S100 Family Signaling Pathway	1.85	0.0141254	0.0107	2.828	ADGRG2,APP,C3AR1,CAMK2D,FCGR2A,GPRC5B,IL10RB,PGF	Huntington's Disease Signaling	4.76	1.7378e-05	0.0468	#NUM!	CAPN1,DNM2,HSPA8,PSMA1,PSMA3,PSMA6,PSMA7,PSMB1,PSMB6,PSMC4,PSMD2,PSMD9,TGM2	RHOGDI Signaling	6.63
γ-glutamyl Cycle	2.25	0.00562341	0.154	#NUM!	ANPEP,GGT1	Rapoport-Luebering Glycolytic Shunt	1.58	0.0263027	0.2	#NUM!	PGAM1	Ephrin B Signaling	3.84	0.000144544	0.0972	1.134	ACP1,CAP1,EPHB2,EPHB4,EPHB6,RAC1,RHOA							Phagosome Maturation	3.58	0.000263027	0.0676	#NUM!	ATP6V1B2,B2M,CALR,PRDX1,PRDX2,PRDX6,RAB5B,RAC1,TUBA1B,TUBB4B	Xenobiotic Metabolism AHR Signaling Pathway	1.58	0.0263027	0.0253	#NUM!	ALDH1A1,ALDH1L1	Thrombin Signaling	1.84	0.0144544	0.0182	#NUM!	CAMK2D,F2,MYL6,RAP1B	Primary Immunodeficiency Signaling	4.65	2.23872e-05	0.118	#NUM!	IGHA1,IGHG2,IGHG3,IGHM,IGLC7,JCHAIN	Phagosome Maturation	6.57
Histamine Degradation	2.25	0.00562341	0.154	#NUM!	ALDH1A1,ALDH9A1	FXR/RXR Activation	1.54	0.0288403	0.024	#NUM!	AGT,HPX,SERPINF1	LXR/RXR Activation	3.81	0.000154882	0.0732	1.414	C4A/C4B,FASN,FGA,HPX,IL36A,ORM1,ORM2,S100A8,VTN							LXR/RXR Activation	3.53	0.000295121	0.0732	1.414	C4A/C4B,FASN,FGA,HPX,IL36A,ORM1,ORM2,S100A8,VTN	Clathrin-mediated Endocytosis Signaling	1.55	0.0281838	0.0146	#NUM!	APOA4,EPHB2,TF	Phenylalanine Degradation I (Aerobic)	1.77	0.0169824	0.25	#NUM!	PCBD1	Role of Macrophages, Fibroblasts and Endothelial Cells in Rheumatoid Arthritis	4.16	6.91831e-05	0.0409	#NUM!	C5,CALML5,CXCL12,DKK3,IGHG2,IGHG3,IGHM,IGLC7,IL1R2,JCHAIN,MIF,RALB,RAP2B	Paxillin Signaling	6.56
BAG2 Signaling Pathway	2.25	0.00562341	0.0494	#NUM!	PSMA7,PSMB4,PSMB5,PSMB6	Ferroptosis Signaling Pathway	1.52	0.0301995	0.0236	#NUM!	DPP4,PEBP1,SLC3A2	14-3-3-mediated Signaling	3.73	0.000186209	0.0714	2.646	GRB2,PDIA3,RALA,RALB,RAP2B,TUBA1B,TUBB4B,YWHAB,YWHAZ							Coagulation System	3.49	0.000323594	0.143	1.342	A2M,F10,F11,FGA,PLAU	HIPPO signaling	1.52	0.0301995	0.0235	#NUM!	FAT4,YWHAB	FAT10 Cancer Signaling Pathway	1.72	0.0190546	0.04	#NUM!	ACVR1B,TGFBR3	Superoxide Radicals Degradation	4.12	7.58578e-05	0.375	#NUM!	CAT,SOD1,SOD3	Endocannabinoid Developing Neuron Pathway	6.54
Systemic Lupus Erythematosus Signaling	2.21	0.00616595	0.0203	#NUM!	C9,FCGR3A/FCGR3B,IGHM,IGHV3-73,IGHV6-1,IGKV1-17,IGKV2-24,IGKV3-20,IGKV4-1,IGLV1-51,IGLV2-18,IGLV7-43	Role Of Osteoblasts In Rheumatoid Arthritis Signaling Pathway	1.48	0.0331131	0.0175	2	CTSA,CTSD,CXCL12,MMP7	Coagulation System	3.67	0.000213796	0.143	1.342	A2M,F10,F11,FGA,PLAU							14-3-3-mediated Signaling	3.45	0.000354813	0.0714	2.646	GRB2,PDIA3,RALA,RALB,RAP2B,TUBA1B,TUBB4B,YWHAB,YWHAZ	Glycine Betaine Degradation	1.5	0.0316228	0.1	#NUM!	SHMT1	STAT3 Pathway	1.7	0.0199526	0.0222	#NUM!	IL10RB,RAP1B,TGFBR3	Pentose Phosphate Pathway	3.8	0.000158489	0.3	#NUM!	PGD,TALDO1,TKT	CCR3 Signaling in Eosinophils	6.42
Phenylalanine Degradation IV (Mammalian, via Side Chain)	2.19	0.00645654	0.143	#NUM!	GOT1,HPD	Iron homeostasis signaling pathway	1.48	0.0331131	0.0227	#NUM!	CP,HBG1,HPX	fMLP Signaling in Neutrophils	3.65	0.000223872	0.0698	3	ARPC1A,ARPC2,ARPC4,ARPC5,CALML5,RAC1,RALA,RALB,RAP2B							fMLP Signaling in Neutrophils	3.38	0.000416869	0.0698	3	ARPC1A,ARPC2,ARPC4,ARPC5,CALML5,RAC1,RALA,RALB,RAP2B	RHOGDI Signaling	1.49	0.0323594	0.0138	#NUM!	CDH16,CDH19,MYL6	Reelin Signaling in Neurons	1.68	0.020893	0.0217	#NUM!	APP,CAMK2D,RAP1B	Role of Tissue Factor in Cancer	3.49	0.000323594	0.0609	#NUM!	CFL1,F10,FGA,FGB,FGG,RALB,RAP2B	Mechanisms of Viral Exit from Host Cells	6.4
Systemic Lupus Erythematosus In B Cell Signaling Pathway	2.18	0.00660693	0.0222	#NUM!	IGHM,IGHV3-73,IGHV6-1,IGKV1-17,IGKV2-24,IGKV3-20,IGKV4-1,IGLV1-51,IGLV2-18,IGLV7-43	SPINK1 Pancreatic Cancer Pathway	1.46	0.0346737	0.0364	#NUM!	CTSA,ELANE	Axonal Guidance Signaling	3.44	0.000363078	0.0386	#NUM!	ARPC1A,ARPC2,ARPC4,ARPC5,BMP6,EPHA10,EPHB2,EPHB4,EPHB6,GRB2,MYL6,PDIA3,RAC1,RALA,RALB,RAP2B,RHOA,TUBA1B,TUBB4B							Neuroprotective Role of THOP1 in Alzheimer's Disease	3.13	0.00074131	0.0714	2.828	ENDOU,F11,KLK10,KLK11,KLK6,PRSS27,ST14,TMPRSS11D	LPS/IL-1 Mediated Inhibition of RXR Function	1.47	0.0338844	0.0136	#NUM!	ALDH1A1,ALDH1L1,SOD3	Arsenate Detoxification I (Glutaredoxin)	1.68	0.020893	0.2	#NUM!	GSTO1	Inosine-5'-phosphate Biosynthesis II	3.42	0.000380189	0.667	#NUM!	ATIC,PAICS	Axonal Guidance Signaling	6.37
Hepatic Fibrosis / Hepatic Stellate Cell Activation	2.17	0.00676083	0.0316	#NUM!	A2M,AGT,CD14,COL6A1,EGF,ICAM1	Aspartate Degradation II	1.44	0.0363078	0.143	#NUM!	MDH1	Role of Tissue Factor in Cancer	3.3	0.000501187	0.0696	#NUM!	F10,FGA,P4HB,PDIA6,RAC1,RALA,RALB,RAP2B							Oncostatin M Signaling	3.07	0.000851138	0.116	2.236	GRB2,PLAU,RALA,RALB,RAP2B	γ-glutamyl Cycle	1.39	0.040738	0.0769	#NUM!	GGT1	Superpathway of Serine and Glycine Biosynthesis I	1.68	0.020893	0.2	#NUM!	SHMT1	HIPPO signaling	3.4	0.000398107	0.0706	-2	PPP1R7,PPP2R1A,PTPA,SKP1,YWHAE,YWHAG	Epithelial Adherens Junction Signaling	6.29
Communication between Innate and Adaptive Immune Cells	2.09	0.00812831	0.0216	#NUM!	IGHM,IGHV3-73,IGHV6-1,IGKV1-17,IGKV2-24,IGKV3-20,IGKV4-1,IGLV1-51,IGLV2-18,IGLV7-43	Role Of Chondrocytes In Rheumatoid Arthritis Signaling Pathway	1.42	0.0380189	0.0214	#NUM!	CXCL12,MMP7,PLAU	Oncostatin M Signaling	3.24	0.00057544	0.116	2.236	GRB2,PLAU,RALA,RALB,RAP2B							Role of Tissue Factor in Cancer	3.05	0.000891251	0.0696	#NUM!	F10,FGA,P4HB,PDIA6,RAC1,RALA,RALB,RAP2B	Histamine Degradation	1.39	0.040738	0.0769	#NUM!	ALDH1A1	Myo-inositol Biosynthesis	1.68	0.020893	0.2	#NUM!	IMPA1	PI3K/AKT Signaling	3.37	0.00042658	0.0455	1.414	HSP90AA1,HSP90AB1,IL1R2,PPP2R1A,PTPA,RALB,RAP2B,YWHAE,YWHAG	Antiproliferative Role of Somatostatin Receptor 2	6.29
Neutrophil Extracellular Trap Signaling Pathway	2.07	0.00851138	0.0227	1.667	CD14,COL6A1,FCGR3A/FCGR3B,IGHM,LCAT,PRDX6,SERPINB1,VDAC1,VDAC2	Sucrose Degradation V (Mammalian)	1.38	0.0416869	0.125	#NUM!	ALDOB	p70S6K Signaling	3.21	0.000616595	0.0439	1.89	EEF2,GRB2,IGHA1,IGHV1-2,IGHV6-1,IGLV3-10,IGLV3-21,PDIA3,PPP2R1A,RALA,RALB,RAP2B,YWHAB,YWHAZ							Axonal Guidance Signaling	2.99	0.00102329	0.0386	#NUM!	ARPC1A,ARPC2,ARPC4,ARPC5,BMP6,EPHA10,EPHB2,EPHB4,EPHB6,GRB2,MYL6,PDIA3,RAC1,RALA,RALB,RAP2B,RHOA,TUBA1B,TUBB4B	Choline Biosynthesis III	1.36	0.0436516	0.0714	#NUM!	PLD3	dTMP De Novo Biosynthesis	1.68	0.020893	0.2	#NUM!	SHMT1	IL-6 Signaling	3.18	0.000660693	0.0543	2.236	A2M,CD14,CRP,IL1R2,LBP,RALB,RAP2B	Germ Cell-Sertoli Cell Junction Signaling	5.96
Extrinsic Prothrombin Activation Pathway	2.07	0.00851138	0.125	#NUM!	FGG,SERPINC1	Superoxide Radicals Degradation	1.38	0.0416869	0.125	#NUM!	SOD3	Glutathione-mediated Detoxification	3.09	0.000812831	0.148	2	GSTM1,GSTM3,GSTO1,GSTP1							Glutathione-mediated Detoxification	2.95	0.00112202	0.148	2	GSTM1,GSTM3,GSTO1,GSTP1	Superpathway of Citrulline Metabolism	1.33	0.0467735	0.0667	#NUM!	ASS1	Folate Polyglutamylation	1.68	0.020893	0.2	#NUM!	SHMT1	Eumelanin Biosynthesis	3.13	0.00074131	0.5	#NUM!	DDT,MIF	LXR/RXR Activation	5.86
Fatty Acid α-oxidation	2.07	0.00851138	0.125	#NUM!	ALDH1A1,ALDH9A1	Remodeling of Epithelial Adherens Junctions	1.32	0.047863	0.0303	#NUM!	ACTG1,TUBA1B	Mitochondrial Dysfunction	3.06	0.000870964	0.0424	-0.832	ATP5F1A,ATP5F1B,CALML5,CAPN1,CAPN2,CAPNS1,COX6B1,GPX1,GSR,GSTM1,GSTP1,PRDX6,SOD1,SOD2							γ-glutamyl Cycle	2.89	0.00128825	0.231	#NUM!	GGCT,GGT6,GSS	Leukotriene Biosynthesis	1.33	0.0467735	0.0667	#NUM!	GGT1	Semaphorin Neuronal Repulsive Signaling Pathway	1.62	0.0239883	0.0207	#NUM!	CD44,CSPG4,MYL6	Mitotic Roles of Polo-Like Kinase	3.11	0.000776247	0.0781	#NUM!	CAPN1,HSP90AA1,HSP90AB1,PPP2R1A,PTPA	α-Adrenergic Signaling	5.68
Altered T Cell and B Cell Signaling in Rheumatoid Arthritis	2.04	0.00912011	0.0212	#NUM!	IGHM,IGHV3-73,IGHV6-1,IGKV1-17,IGKV2-24,IGKV3-20,IGKV4-1,IGLV1-51,IGLV2-18,IGLV7-43							VEGF Signaling	3.04	0.000912011	0.0722	1.89	ACTN1,ACTN4,GRB2,RALA,RALB,RAP2B,VCL							p70S6K Signaling	2.85	0.00141254	0.0439	1.89	EEF2,GRB2,IGHA1,IGHV1-2,IGHV6-1,IGLV3-10,IGLV3-21,PDIA3,PPP2R1A,RALA,RALB,RAP2B,YWHAB,YWHAZ							G-Protein Coupled Receptor Signaling	1.57	0.0269153	0.0102	2.646	ADGRG2,C3AR1,CAMK2D,GPRC5B,MYL6,RAP1B,TTN	PPARα/RXRα Activation	2.95	0.00112202	0.0437	-1.134	APOA1,APOA2,CAND1,HSP90AA1,HSP90AB1,IL1R2,RALB,RAP2B	Complement System	5.66
Fcγ Receptor-mediated Phagocytosis in Macrophages and Monocytes	2.04	0.00912011	0.043	2	ACTG1,ARPC4,FCGR3A/FCGR3B,PLD3							γ-glutamyl Cycle	3	0.001	0.231	#NUM!	GGCT,GGT6,GSS							VEGF Signaling	2.83	0.00147911	0.0722	1.89	ACTN1,ACTN4,GRB2,RALA,RALB,RAP2B,VCL							Ovarian Cancer Signaling	1.54	0.0288403	0.0192	#NUM!	CD44,PGF,RAP1B	Telomerase Signaling	2.92	0.00120226	0.0571	0.816	HSP90AA1,HSP90AB1,PPP2R1A,PTPA,RALB,RAP2B	Sertoli Cell-Sertoli Cell Junction Signaling	5.65
NAD Signaling Pathway	2.04	0.00912011	0.0345	2.236	BST1,EGF,LDHA,LDHB,SOD2							Apoptosis Signaling	2.91	0.00123027	0.0686	0.378	CAPN1,CAPN2,CAPNS1,LMNA,RALA,RALB,RAP2B							Mitochondrial Dysfunction	2.71	0.00194984	0.0424	-0.832	ATP5F1A,ATP5F1B,CALML5,CAPN1,CAPN2,CAPNS1,COX6B1,GPX1,GSR,GSTM1,GSTP1,PRDX6,SOD1,SOD2							Thioredoxin Pathway	1.53	0.0295121	0.143	#NUM!	TXN	Rapoport-Luebering Glycolytic Shunt	2.91	0.00123027	0.4	#NUM!	BPGM,PGAM1	Gluconeogenesis I	5.49
Putrescine Degradation III	2.02	0.00954993	0.118	#NUM!	ALDH1A1,ALDH9A1							Macropinocytosis Signaling	2.88	0.00131826	0.0789	2	ACTN4,RAC1,RALA,RALB,RAP2B,RHOA							Apoptosis Signaling	2.7	0.00199526	0.0686	0.378	CAPN1,CAPN2,CAPNS1,LMNA,RALA,RALB,RAP2B							Aspartate Degradation II	1.53	0.0295121	0.143	#NUM!	MDH2	Ephrin B Signaling	2.88	0.00131826	0.0694	0	ACP1,CAP1,CFL1,CXCL12,HNRNPK	Protein Ubiquitination Pathway	5.38
Clathrin-mediated Endocytosis Signaling	2.01	0.00977237	0.0291	#NUM!	ACTG1,ARPC4,EGF,PON1,SERPINA1,TF							IGF-1 Signaling	2.84	0.00144544	0.0667	2	GRB2,IGFBP2,RALA,RALB,RAP2B,YWHAB,YWHAZ							Macropinocytosis Signaling	2.69	0.00204174	0.0789	2	ACTN4,RAC1,RALA,RALB,RAP2B,RHOA							Th1 and Th2 Activation Pathway	1.47	0.0338844	0.018	#NUM!	ACVR1B,IL10RB,TGFBR3	Hypoxia Signaling in the Cardiovascular System	2.83	0.00147911	0.0676	#NUM!	HSP90AA1,HSP90AB1,UBE2L3,UBE2N,UBE2V1	RAC Signaling	5.37
Role of NFAT in Regulation of the Immune Response	1.92	0.0120226	0.0193	#NUM!	FCGR3A/FCGR3B,IGHM,IGHV3-73,IGHV6-1,IGKV1-17,IGKV2-24,IGKV3-20,IGKV4-1,IGLV1-51,IGLV2-18,IGLV7-43							HIF1α Signaling	2.79	0.00162181	0.049	1.667	BMP6,HMOX1,HSP90AA1,HSPA5,PKM,RAC1,RACK1,RALA,RALB,RAP2B							Iron homeostasis signaling pathway	2.67	0.00213796	0.0606	#NUM!	ATP6V1B2,BMP6,CP,GDF15,HMOX1,HPX,PCBP1,SKP1							GM-CSF Signaling	1.45	0.0354813	0.0286	#NUM!	CAMK2D,RAP1B	Chemokine Signaling	2.75	0.00177828	0.0649	1.342	CALML5,CFL1,CXCL12,RALB,RAP2B	Apelin Endothelial Signaling Pathway	5.3
Phospholipase C Signaling	1.92	0.0120226	0.0185	#NUM!	IGHM,IGHV3-73,IGHV6-1,IGKV1-17,IGKV2-24,IGKV3-20,IGKV4-1,IGLV1-51,IGLV2-18,IGLV7-43,PEBP1,PLD3							Xenobiotic Metabolism General Signaling Pathway	2.78	0.00165959	0.058	2.828	GSTM1,GSTM3,GSTO1,GSTP1,HMOX1,RALA,RALB,RAP2B							IGF-1 Signaling	2.63	0.00234423	0.0667	2	GRB2,IGFBP2,RALA,RALB,RAP2B,YWHAB,YWHAZ							Role Of Osteoclasts In Rheumatoid Arthritis Signaling Pathway	1.45	0.0354813	0.0137	1	COL15A1,FCGR2A,RAP1B,SFRP4	Pentose Phosphate Pathway (Non-oxidative Branch)	2.74	0.0018197	0.333	#NUM!	TALDO1,TKT	Extrinsic Prothrombin Activation Pathway	5.27
LPS/IL-1 Mediated Inhibition of RXR Function	1.87	0.0134896	0.0271	#NUM!	ALDH1A1,ALDH9A1,CAT,CD14,GSTA2,SOD3							mTOR Signaling	2.77	0.00169824	0.0488	1.89	EIF4A1,HMOX1,PPP2R1A,RAC1,RALA,RALB,RAP2B,RHOA,RPS2,RPS9							Xenobiotic Metabolism General Signaling Pathway	2.55	0.00281838	0.058	2.828	GSTM1,GSTM3,GSTO1,GSTP1,HMOX1,RALA,RALB,RAP2B							Glioma Invasiveness Signaling	1.44	0.0363078	0.0282	#NUM!	CD44,RAP1B	CDK5 Signaling	2.73	0.00186209	0.0526	1.633	CAPN1,PPP1R7,PPP2R1A,PTPA,RALB,RAP2B	Virus Entry via Endocytic Pathways	5.26
Asparagine Degradation I	1.76	0.017378	0.5	#NUM!	ASRGL1							Regulation of Actin-based Motility by Rho	2.73	0.00186209	0.0636	2.646	ARPC1A,ARPC2,ARPC4,ARPC5,MYL6,RAC1,RHOA							Glutathione Redox Reactions II	2.54	0.00288403	0.4	#NUM!	GSR,PDIA3							Folate Transformations I	1.42	0.0380189	0.111	#NUM!	SHMT1	Epithelial Adherens Junction Signaling	2.71	0.00194984	0.0449	-1.134	CFL1,PPP2R1A,PTPA,RALB,RAP2B,YWHAE,YWHAG	Intrinsic Prothrombin Activation Pathway	5.26
Alanine Degradation III	1.76	0.017378	0.5	#NUM!	GPT							Immunogenic Cell Death Signaling Pathway	2.66	0.00218776	0.0714	2.449	ANXA1,CALR,HSP90AA1,HSPA5,PDIA3,PYCARD							HIF1α Signaling	2.52	0.00301995	0.049	1.667	BMP6,HMOX1,HSP90AA1,HSPA5,PKM,RAC1,RACK1,RALA,RALB,RAP2B							Breast Cancer Regulation by Stathmin1	1.42	0.0380189	0.0103	1.633	ADGRG2,C3AR1,CAMK2D,GPRC5B,PGF,RAP1B	Glutathione Redox Reactions I	2.62	0.00239883	0.125	#NUM!	GPX1,GSR,PRDX6	Estrogen Receptor Signaling	5.19
Alanine Biosynthesis II	1.76	0.017378	0.5	#NUM!	GPT							PEDF Signaling	2.66	0.00218776	0.0714	0.816	RAC1,RALA,RALB,RAP2B,RHOA,SOD2							Regulation of Actin-based Motility by Rho	2.52	0.00301995	0.0636	2.646	ARPC1A,ARPC2,ARPC4,ARPC5,MYL6,RAC1,RHOA							ERK5 Signaling	1.4	0.0398107	0.027	#NUM!	RAP1B,YWHAB	Glucocorticoid Receptor Signaling	2.46	0.00346737	0.0258	#NUM!	A2M,AGT,FGG,HP,HSP90AA1,HSP90AB1,HSPA8,IL1R2,KRT18,KRT6C,KRT8,PLAU,RALB,RAP2B	Synaptogenesis Signaling Pathway	5.15
Thyroid Hormone Biosynthesis	1.76	0.017378	0.5	#NUM!	CTSD							Amyotrophic Lateral Sclerosis Signaling	2.64	0.00229087	0.0614	1.134	CAPN1,CAPN2,CAPNS1,GPX1,RAB5B,RAC1,SOD1							mTOR Signaling	2.5	0.00316228	0.0488	1.89	EIF4A1,HMOX1,PPP2R1A,RAC1,RALA,RALB,RAP2B,RHOA,RPS2,RPS9							CREB Signaling in Neurons	1.39	0.040738	0.0101	2.449	ADGRG2,C3AR1,CAMK2D,GPRC5B,RAP1B,TGFBR3	Xenobiotic Metabolism Signaling	2.42	0.00380189	0.0331	#NUM!	CAT,ESD,HSP90AA1,HSP90AB1,PPP2R1A,PTPA,RALB,RAP2B,SOD3	Oncostatin M Signaling	5.11
Tumoricidal Function of Hepatic Natural Killer Cells	1.73	0.0186209	0.0833	#NUM!	ICAM1,LYVE1							ERK/MAPK Signaling	2.62	0.00239883	0.0465	2.121	GRB2,HSPB1,PPP2R1A,RAC1,RALA,RALB,RAP2B,TLN1,YWHAB,YWHAZ							MSP-RON Signaling Pathway	2.49	0.00323594	0.0862	#NUM!	F11,KLK10,KLK11,KLK13,KLK6							Glycine Betaine Degradation	1.38	0.0416869	0.1	#NUM!	SHMT1	Iron homeostasis signaling pathway	2.41	0.00389045	0.0455	#NUM!	CP,HBB,HBG1,HP,SKP1,TF	Endometrial Cancer Signaling	5.09
Dopamine Degradation	1.73	0.0186209	0.0833	#NUM!	ALDH1A1,ALDH9A1							Glutathione Redox Reactions II	2.61	0.00245471	0.4	#NUM!	GSR,PDIA3							Immunogenic Cell Death Signaling Pathway	2.47	0.00338844	0.0714	2.449	ANXA1,CALR,HSP90AA1,HSPA5,PDIA3,PYCARD							Chemokine Signaling	1.37	0.042658	0.026	#NUM!	CAMK2D,RAP1B	Regulation of eIF4 and p70S6K Signaling	2.41	0.00389045	0.0398	0	EIF4A1,PPP2R1A,PTPA,RALB,RAP2B,RPS16,RPS9	Pulmonary Healing Signaling Pathway	5.09
Glutathione-mediated Detoxification	1.63	0.0234423	0.0741	#NUM!	ANPEP,GSTA2							Apelin Adipocyte Signaling Pathway	2.61	0.00245471	0.0698	2.236	GPX1,GSTM1,GSTP1,PRDX6,RAC1,SOD1							PEDF Signaling	2.47	0.00338844	0.0714	0.816	RAC1,RALA,RALB,RAP2B,RHOA,SOD2							Synaptogenesis Signaling Pathway	1.37	0.042658	0.0129	2	CAMK2D,CDH19,LRP1,RAP1B	Mitochondrial Dysfunction	2.36	0.00436516	0.0303	-1	CALML5,CAPN1,COX5A,COX6B1,CYB5A,GPX1,GSR,PARK7,PRDX6,SOD1	FXR/RXR Activation	4.99
Ethanol Degradation II	1.6	0.0251189	0.0714	#NUM!	ALDH1A1,ALDH9A1							Endometrial Cancer Signaling	2.58	0.00263027	0.0833	1.342	CTNNA1,GRB2,RALA,RALB,RAP2B							Amyotrophic Lateral Sclerosis Signaling	2.43	0.00371535	0.0614	1.134	CAPN1,CAPN2,CAPNS1,GPX1,RAB5B,RAC1,SOD1							PPARα/RXRα Activation	1.37	0.042658	0.0164	#NUM!	ACVR1B,RAP1B,TGFBR3	MicroRNA Biogenesis Signaling Pathway	2.32	0.0047863	0.0383	1.89	HNRNPD,HSP90AA1,HSP90AB1,HSPA8,RALB,RAP2B,ST13	Ferroptosis Signaling Pathway	4.92
Ferroptosis Signaling Pathway	1.59	0.025704	0.0315	#NUM!	PEBP1,SLC3A2,TF,VDAC2							Cholecystokinin/Gastrin-mediated Signaling	2.57	0.00269153	0.0598	2.449	GRB2,IL36A,RAC1,RALA,RALB,RAP2B,RHOA							Endometrial Cancer Signaling	2.42	0.00380189	0.0833	1.342	CTNNA1,GRB2,RALA,RALB,RAP2B							Leukocyte Extravasation Signaling	1.33	0.0467735	0.0159	#NUM!	CD44,MYL6,RAP1B	MSP-RON Signaling In Cancer Cells Pathway	2.31	0.00489779	0.0432	2.449	F12,KLKB1,RALB,RAP2B,YWHAE,YWHAG	Atherosclerosis Signaling	4.89
L-carnitine Biosynthesis	1.58	0.0263027	0.333	#NUM!	ALDH9A1							Antigen Presentation Pathway	2.52	0.00301995	0.105	#NUM!	B2M,CALR,PDIA3,PSMB6							Apelin Adipocyte Signaling Pathway	2.42	0.00380189	0.0698	2.236	GPX1,GSTM1,GSTP1,PRDX6,RAC1,SOD1													Macrophage Alternative Activation Signaling Pathway	2.2	0.00630957	0.0363	2.646	ARG1,IGHG2,IGHG3,IGHM,IGLC7,IL1R2,JCHAIN	Signaling by Rho Family GTPases	4.83
NADH Repair	1.58	0.0263027	0.333	#NUM!	NAXE							Leukocyte Extravasation Signaling	2.48	0.00331131	0.0476	1.414	ACTN1,ACTN4,ARHGAP1,CDH5,CTNNA1,MYL6,RAC1,RHOA,VCL							Antigen Presentation Pathway	2.39	0.0040738	0.105	#NUM!	B2M,CALR,PDIA3,PSMB6													PPAR Signaling	2.19	0.00645654	0.0481	-2.236	HSP90AA1,HSP90AB1,IL1R2,RALB,RAP2B	Xenobiotic Metabolism Signaling	4.69
D-glucuronate Degradation I	1.58	0.0263027	0.333	#NUM!	CRYL1							RHOA Signaling	2.47	0.00338844	0.0574	1.89	ARHGAP1,ARPC1A,ARPC2,ARPC4,ARPC5,MYL6,RHOA							Cholecystokinin/Gastrin-mediated Signaling	2.37	0.0042658	0.0598	2.449	GRB2,IL36A,RAC1,RALA,RALB,RAP2B,RHOA													Purine Nucleotides De Novo Biosynthesis II	2.19	0.00645654	0.182	#NUM!	ATIC,PAICS	UVC-Induced MAPK Signaling	4.61
Thiosulfate Disproportionation III (Rhodanese)	1.58	0.0263027	0.333	#NUM!	MPST							Xenobiotic Metabolism Signaling	2.36	0.00436516	0.0404	#NUM!	GSTM1,GSTM3,GSTO1,GSTP1,HMOX1,HSP90AA1,PPP2R1A,RALA,RALB,RAP2B,SULT2B1							ERK/MAPK Signaling	2.36	0.00436516	0.0465	2.121	GRB2,HSPB1,PPP2R1A,RAC1,RALA,RALB,RAP2B,TLN1,YWHAB,YWHAZ													IGF-1 Signaling	2.17	0.00676083	0.0476	#NUM!	IGFBP1,RALB,RAP2B,YWHAE,YWHAG	Glycogen Degradation II	4.6
Glutamate Degradation II	1.58	0.0263027	0.333	#NUM!	GOT1							S100 Family Signaling Pathway	2.36	0.00436516	0.0294	3.838	ANXA1,ATP5F1A,ATP5F1B,CALML5,FGFR4,GPR180,IQGAP1,JCHAIN,MCAM,PDIA3,RAC1,RHOA,S100A13,S100A14,S100A16,S100A2,S100A4,S100A6,S100A7,S100A7A,S100A8,S100P							PPARα/RXRα Activation	2.33	0.00467735	0.0492	-1.134	CAND1,FASN,GOT2,GRB2,HSP90AA1,PDIA3,RALA,RALB,RAP2B													mTOR Signaling	2.06	0.00870964	0.0341	0	EIF4A1,PPP2R1A,PTPA,RALB,RAP2B,RPS16,RPS9	CLEAR Signaling Pathway	4.52
Aspartate Biosynthesis	1.58	0.0263027	0.333	#NUM!	GOT1							Agrin Interactions at Neuromuscular Junction	2.35	0.00446684	0.0735	2	PKLR,RAC1,RALA,RALB,RAP2B							RHOA Signaling	2.27	0.00537032	0.0574	1.89	ARHGAP1,ARPC1A,ARPC2,ARPC4,ARPC5,MYL6,RHOA													ERK5 Signaling	2.01	0.00977237	0.0541	2	RALB,RAP2B,YWHAE,YWHAG	MSP-RON Signaling In Macrophages Pathway	4.51
Noradrenaline and Adrenaline Degradation	1.55	0.0281838	0.0667	#NUM!	ALDH1A1,ALDH9A1							IL-6 Signaling	2.34	0.00457088	0.0543	2.646	A2M,GRB2,HSPB1,IL36A,RALA,RALB,RAP2B							GP6 Signaling Pathway	2.25	0.00562341	0.0569	2.646	CALML5,COL6A2,FGA,GRB2,LAMA4,RAC1,TLN1													MSP-RON Signaling In Macrophages Pathway	2	0.01	0.0431	2.236	ARG1,F12,KLKB1,RALB,RAP2B	Cholecystokinin/Gastrin-mediated Signaling	4.47
Oxidative Ethanol Degradation III	1.55	0.0281838	0.0667	#NUM!	ALDH1A1,ALDH9A1							Wound Healing Signaling Pathway	2.31	0.00489779	0.042	3.162	COL6A2,GRB2,IL36A,KRT16,KRT6A,KRT6C,RAC1,RALA,RALB,RAP2B							Leukocyte Extravasation Signaling	2.24	0.0057544	0.0476	1.414	ACTN1,ACTN4,ARHGAP1,CDH5,CTNNA1,MYL6,RAC1,RHOA,VCL													Caveolar-mediated Endocytosis Signaling	1.99	0.0102329	0.0533	#NUM!	ACTG1,ARCN1,DNM2,FLOT2	Cardiac Hypertrophy Signaling	4.46
Protein Ubiquitination Pathway	1.51	0.030903	0.0224	#NUM!	PSMA7,PSMB4,PSMB5,PSMB6,UBE2V1,UCHL1							Aspartate Degradation II	2.3	0.00501187	0.286	#NUM!	GOT2,MDH2							Glycogen Biosynthesis II (from UDP-D-Glucose)	2.23	0.00588844	0.286	#NUM!	GYG1,UGP2													Chaperone Mediated Autophagy Signaling Pathway	1.98	0.0104713	0.0253	-1.508	EIF4A1,HSP90AA1,HSP90AB1,HSPA8,PARK7,PSMA1,PSMA3,PSMA6,PSMA7,PSMB1,PSMB6	NGF Signaling	4.41
Retinoate Biosynthesis I	1.47	0.0338844	0.0606	#NUM!	AKR1C3,ALDH1A1							GM-CSF Signaling	2.29	0.00512861	0.0714	2.236	GRB2,RACK1,RALA,RALB,RAP2B							Aspartate Degradation II	2.23	0.00588844	0.286	#NUM!	GOT2,MDH2													Oncostatin M Signaling	1.9	0.0125893	0.0698	#NUM!	PLAU,RALB,RAP2B	VEGF Signaling	4.36
Pentose Phosphate Pathway (Oxidative Branch)	1.46	0.0346737	0.25	#NUM!	PGLS							Iron homeostasis signaling pathway	2.28	0.00524807	0.053	#NUM!	ATP6V1B2,BMP6,CP,HMOX1,HPX,PCBP1,SKP1							S100 Family Signaling Pathway	2.22	0.0060256	0.0307	3.962	ADGRL3,ANXA1,ATP5F1A,ATP5F1B,CALML5,FGFR4,GPR180,IQGAP1,JCHAIN,MCAM,PDIA3,RAC1,RHOA,S100A13,S100A14,S100A16,S100A2,S100A4,S100A6,S100A7,S100A7A,S100A8,S100P													LPS/IL-1 Mediated Inhibition of RXR Function	1.89	0.0128825	0.0317	0.447	APOC1,APOE,CAT,CD14,IL1R2,LBP,SOD3	GDNF Family Ligand-Receptor Interactions	4.33
Catecholamine Biosynthesis	1.46	0.0346737	0.25	#NUM!	DDC							CLEAR Signaling Pathway	2.26	0.00549541	0.0391	-1.508	ATP6V1B2,BMP6,FGFR4,NAGLU,PPP2R1A,PSAP,RALA,RALB,RAP2B,YWHAB,YWHAZ							Agrin Interactions at Neuromuscular Junction	2.19	0.00645654	0.0735	2	PKLR,RAC1,RALA,RALB,RAP2B													Xenobiotic Metabolism CAR Signaling Pathway	1.87	0.0134896	0.0349	2.449	HSP90AA1,HSP90AB1,PPP2R1A,PTPA,RACK1,SOD3	Glycogen Degradation III	4.27
Eumelanin Biosynthesis	1.46	0.0346737	0.25	#NUM!	DDT							nNOS Signaling in Neurons	2.25	0.00562341	0.0889	#NUM!	CALML5,CAPN1,CAPN2,CAPNS1							IL-6 Signaling	2.14	0.00724436	0.0543	2.646	A2M,GRB2,HSPB1,IL36A,RALA,RALB,RAP2B													iNOS Signaling	1.85	0.0141254	0.0667	#NUM!	CALML5,CD14,LBP	Histamine Degradation	4.27
L-cysteine Degradation I	1.46	0.0346737	0.25	#NUM!	GOT1							PPAR Signaling	2.2	0.00630957	0.0577	-2.449	GRB2,HSP90AA1,IL36A,RALA,RALB,RAP2B							GM-CSF Signaling	2.14	0.00724436	0.0714	2.236	GRB2,RACK1,RALA,RALB,RAP2B													Immunogenic Cell Death Signaling Pathway	1.82	0.0151356	0.0476	2	CALR,HSP90AA1,HSP90AB1,HSPA8	Renal Cell Carcinoma Signaling	4.25
Huntington's Disease Signaling	1.44	0.0363078	0.0216	#NUM!	CTSD,EGF,PSMA7,PSMB4,PSMB5,PSMB6							Xenobiotic Metabolism CAR Signaling Pathway	2.2	0.00630957	0.0465	2.828	GSTM1,GSTM3,GSTO1,GSTP1,HSP90AA1,PPP2R1A,RACK1,SULT2B1							nNOS Signaling in Neurons	2.12	0.00758578	0.0889	#NUM!	CALML5,CAPN1,CAPN2,CAPNS1													LPS-stimulated MAPK Signaling	1.81	0.0154882	0.0471	#NUM!	CD14,LBP,RALB,RAP2B	Tumor Microenvironment Pathway	4.22
TR/RXR Activation	1.42	0.0380189	0.0357	#NUM!	AKR1C3,HP,PCK1							ERK5 Signaling	2.19	0.00645654	0.0676	2.236	RALA,RALB,RAP2B,YWHAB,YWHAZ							PI3K/AKT Signaling	2.11	0.00776247	0.0455	2.121	GDF15,GRB2,HSP90AA1,PPP2R1A,RALA,RALB,RAP2B,YWHAB,YWHAZ													Apelin Adipocyte Signaling Pathway	1.79	0.0162181	0.0465	2	CAT,GPX1,PRDX6,SOD1	Apoptosis Signaling	4.19
NRF2-mediated Oxidative Stress Response	1.41	0.0389045	0.0237	#NUM!	ACTG1,CAT,GSTA2,SOD2,SOD3							Hypoxia Signaling in the Cardiovascular System	2.19	0.00645654	0.0676	#NUM!	HSP90AA1,P4HB,UBE2L3,UBE2N,UBE2V1							Superoxide Radicals Degradation	2.11	0.00776247	0.25	#NUM!	SOD1,SOD2													Regulation of Cellular Mechanics by Calpain Protease	1.76	0.017378	0.0455	1	CAPN1,CAST,RALB,RAP2B	Opioid Signaling Pathway	4.06
Aryl Hydrocarbon Receptor Signaling	1.39	0.040738	0.0272	#NUM!	ALDH1A1,ALDH9A1,CTSD,GSTA2							Superoxide Radicals Degradation	2.18	0.00660693	0.25	#NUM!	SOD1,SOD2							Xenobiotic Metabolism Signaling	2.09	0.00812831	0.0404	#NUM!	GSTM1,GSTM3,GSTO1,GSTP1,HMOX1,HSP90AA1,PPP2R1A,RALA,RALB,RAP2B,SULT2B1													Cell Cycle: G2/M DNA Damage Checkpoint Regulation	1.73	0.0186209	0.06	#NUM!	SKP1,YWHAE,YWHAG	Molecular Mechanisms of Cancer	4.06
Creatine-phosphate Biosynthesis	1.37	0.042658	0.2	#NUM!	CKB							Telomerase Signaling	2.18	0.00660693	0.0571	1.633	GRB2,HSP90AA1,PPP2R1A,RALA,RALB,RAP2B							Wound Healing Signaling Pathway	2.06	0.00870964	0.042	3.162	COL6A2,GRB2,IL36A,KRT16,KRT6A,KRT6C,RAC1,RALA,RALB,RAP2B													Glutaryl-CoA Degradation	1.72	0.0190546	0.105	#NUM!	CA1,PARK7	P2Y Purigenic Receptor Signaling Pathway	4.03
Serotonin and Melatonin Biosynthesis	1.37	0.042658	0.2	#NUM!	DDC							EIF2 Signaling	2.16	0.00691831	0.0425	1.633	EIF4A1,GRB2,HSPA5,RALA,RALB,RAP2B,RPLP2,RPS2,RPS9							ERK5 Signaling	2.04	0.00912011	0.0676	2.236	RALA,RALB,RAP2B,YWHAB,YWHAZ													Actin Cytoskeleton Signaling	1.71	0.0194984	0.0292	1.342	ACTG1,CD14,CFL1,LBP,PFN1,RALB,RAP2B	Iron homeostasis signaling pathway	4.03
Galactose Degradation I (Leloir Pathway)	1.37	0.042658	0.2	#NUM!	GALM							GDNF Family Ligand-Receptor Interactions	2.14	0.00724436	0.0658	2.236	GRB2,RAC1,RALA,RALB,RAP2B							Hypoxia Signaling in the Cardiovascular System	2.04	0.00912011	0.0676	#NUM!	HSP90AA1,P4HB,UBE2L3,UBE2N,UBE2V1													Ceramide Signaling	1.71	0.0194984	0.044	2	PPP2R1A,PTPA,RALB,RAP2B	PEDF Signaling	4.02
Tyrosine Degradation I	1.37	0.042658	0.2	#NUM!	HPD							Regulation of eIF4 and p70S6K Signaling	2.14	0.00724436	0.0455	1.342	EIF4A1,GRB2,PPP2R1A,RALA,RALB,RAP2B,RPS2,RPS9							PPAR Signaling	2.02	0.00954993	0.0577	-2.449	GRB2,HSP90AA1,IL36A,RALA,RALB,RAP2B													Phagosome Formation	1.7	0.0199526	0.0209	3.051	C3,CD14,CFL1,GPR180,IGHA1,IGHG2,IGHG3,IGHM,IGLC7,JCHAIN,LBP,PRDX6,RALB,RAP2B	Gα12/13 Signaling	4
RHOGDI Signaling	1.36	0.0436516	0.0229	-2.236	ACTG1,ARPC4,CDH11,CDH16,CDH6							Chemokine Signaling	2.12	0.00758578	0.0649	2.236	CALML5,RALA,RALB,RAP2B,RHOA							Telomerase Signaling	2	0.01	0.0571	1.633	GRB2,HSP90AA1,PPP2R1A,RALA,RALB,RAP2B													L-cysteine Degradation III	1.65	0.0223872	0.5	#NUM!	MPST	Production of Nitric Oxide and Reactive Oxygen Species in Macrophages	4
Superpathway of Methionine Degradation	1.36	0.0436516	0.0526	#NUM!	AHCY,GOT1							Cardiac Hypertrophy Signaling	2.12	0.00758578	0.0394	3	CALML5,GRB2,HSPB1,MYL6,PDIA3,RAC1,RALA,RALB,RAP2B,RHOA							CLEAR Signaling Pathway	1.99	0.0102329	0.0391	-1.508	ATP6V1B2,BMP6,FGFR4,NAGLU,PPP2R1A,PSAP,RALA,RALB,RAP2B,YWHAB,YWHAZ													Xanthine and Xanthosine Salvage	1.65	0.0223872	0.5	#NUM!	PNP	Role of NFAT in Cardiac Hypertrophy	3.94
Antigen Presentation Pathway	1.36	0.0436516	0.0526	#NUM!	PSMB5,PSMB6							Renal Cell Carcinoma Signaling	2.09	0.00812831	0.0641	2.236	GRB2,RAC1,RALA,RALB,RAP2B							GDNF Family Ligand-Receptor Interactions	1.99	0.0102329	0.0658	2.236	GRB2,RAC1,RALA,RALB,RAP2B													Formaldehyde Oxidation II (Glutathione-dependent)	1.65	0.0223872	0.5	#NUM!	ESD	PDGF Signaling	3.91
												IL-3 Signaling	2.07	0.00851138	0.0633	2.236	GRB2,RAC1,RALA,RALB,RAP2B							Myelination Signaling Pathway	1.99	0.0102329	0.0375	2.309	ARHGAP1,BMP6,CALML5,FASN,FGFR4,GRB2,LAMA4,RAC1,RALA,RALB,RAP2B,RHOA													VEGF Signaling	1.62	0.0239883	0.0412	#NUM!	ACTG1,RALB,RAP2B,YWHAE	Regulation Of The Epithelial Mesenchymal Transition By Growth Factors Pathway	3.91
												Xenobiotic Metabolism AHR Signaling Pathway	2.07	0.00851138	0.0633	1.342	GSTM1,GSTM3,GSTO1,GSTP1,HSP90AA1							Xenobiotic Metabolism CAR Signaling Pathway	1.98	0.0104713	0.0465	2.828	GSTM1,GSTM3,GSTO1,GSTP1,HSP90AA1,PPP2R1A,RACK1,SULT2B1													eNOS Signaling	1.58	0.0263027	0.0338	#NUM!	CALML5,DNM2,HSP90AA1,HSP90AB1,HSPA8	Neuroprotective Role of THOP1 in Alzheimer's Disease	3.88
												Prostate Cancer Signaling	2.06	0.00870964	0.0541	#NUM!	GRB2,GSTP1,HSP90AA1,RALA,RALB,RAP2B							Chemokine Signaling	1.97	0.0107152	0.0649	2.236	CALML5,RALA,RALB,RAP2B,RHOA													Pyrimidine Deoxyribonucleotides De Novo Biosynthesis I	1.56	0.0275423	0.087	#NUM!	AK1,NME2	Reelin Signaling in Neurons	3.87
												Estrogen-Dependent Breast Cancer Signaling	2.05	0.00891251	0.0625	#NUM!	AKR1B10,HSD17B4,RALA,RALB,RAP2B							Renal Cell Carcinoma Signaling	1.94	0.0114815	0.0641	2.236	GRB2,RAC1,RALA,RALB,RAP2B													MSP-RON Signaling Pathway	1.56	0.0275423	0.0517	#NUM!	ACTG1,F12,KLKB1	Amyotrophic Lateral Sclerosis Signaling	3.82
												Neuroprotective Role of THOP1 in Alzheimer's Disease	2.05	0.00891251	0.0536	2.449	ENDOU,F11,KLK10,KLK6,ST14,TMPRSS11D							Regulation of eIF4 and p70S6K Signaling	1.93	0.011749	0.0455	1.342	EIF4A1,GRB2,PPP2R1A,RALA,RALB,RAP2B,RPS2,RPS9													HIF1α Signaling	1.55	0.0281838	0.0294	0.816	HSP90AA1,HSPA8,RACK1,RALB,RAP2B,TF	Bladder Cancer Signaling	3.82
												PPARα/RXRα Activation	2.04	0.00912011	0.0437	-1.134	FASN,GOT2,GRB2,HSP90AA1,PDIA3,RALA,RALB,RAP2B							EIF2 Signaling	1.92	0.0120226	0.0425	1.633	EIF4A1,GRB2,HSPA5,RALA,RALB,RAP2B,RPLP2,RPS2,RPS9													Diphthamide Biosynthesis	1.48	0.0331131	0.333	#NUM!	EEF2	Erythropoietin Signaling Pathway	3.8
												Pentose Phosphate Pathway	1.98	0.0104713	0.2	#NUM!	PGD,TALDO1							IL-3 Signaling	1.92	0.0120226	0.0633	2.236	GRB2,RAC1,RALA,RALB,RAP2B													NADH Repair	1.48	0.0331131	0.333	#NUM!	GAPDH	Glioblastoma Multiforme Signaling	3.8
												Virus Entry via Endocytic Pathways	1.96	0.0109648	0.0513	#NUM!	B2M,DNM2,RAC1,RALA,RALB,RAP2B							Xenobiotic Metabolism AHR Signaling Pathway	1.92	0.0120226	0.0633	1.342	GSTM1,GSTM3,GSTO1,GSTP1,HSP90AA1													Methylglyoxal Degradation I	1.48	0.0331131	0.333	#NUM!	GLO1	Apelin Muscle Signaling Pathway	3.79
												PAK Signaling	1.96	0.0109648	0.0513	2.449	GRB2,MYL6,RAC1,RALA,RALB,RAP2B							Pentose Phosphate Pathway	1.91	0.0123027	0.2	#NUM!	PGD,TALDO1													Guanine and Guanosine Salvage I	1.48	0.0331131	0.333	#NUM!	PNP	Neuregulin Signaling	3.79
												NGF Signaling	1.92	0.0120226	0.0504	2.449	GRB2,RAC1,RALA,RALB,RAP2B,RHOA							Estrogen-Dependent Breast Cancer Signaling	1.9	0.0125893	0.0625	#NUM!	AKR1B10,HSD17B4,RALA,RALB,RAP2B													Coenzyme A Biosynthesis	1.48	0.0331131	0.333	#NUM!	COASY	Aspartate Degradation II	3.78
												CNTF Signaling	1.92	0.0120226	0.0714	2	GRB2,RALA,RALB,RAP2B							Prostate Cancer Signaling	1.89	0.0128825	0.0541	#NUM!	GRB2,GSTP1,HSP90AA1,RALA,RALB,RAP2B													Thiosulfate Disproportionation III (Rhodanese)	1.48	0.0331131	0.333	#NUM!	MPST	Role Of Osteoclasts In Rheumatoid Arthritis Signaling Pathway	3.78
												PDGF Signaling	1.9	0.0125893	0.0575	1.342	ACP1,GRB2,RALA,RALB,RAP2B							Cardiac Hypertrophy Signaling	1.87	0.0134896	0.0394	3	CALML5,GRB2,HSPB1,MYL6,PDIA3,RAC1,RALA,RALB,RAP2B,RHOA													Adenine and Adenosine Salvage I	1.48	0.0331131	0.333	#NUM!	PNP	Sphingosine-1-phosphate Signaling	3.73
												Glycogen Degradation II	1.9	0.0125893	0.182	#NUM!	MTAP,PGM2							Glycogen Degradation II	1.83	0.0147911	0.182	#NUM!	MTAP,PGM2													Tryptophan Degradation III (Eukaryotic)	1.46	0.0346737	0.0769	#NUM!	CA1,PARK7	PAK Signaling	3.73
												ILK Signaling	1.88	0.0131826	0.0408	0.816	ACTN1,ACTN4,DSP,MYL6,PPP2R1A,RAC1,RHOA,VCL							SPINK1 Pancreatic Cancer Pathway	1.82	0.0151356	0.0727	-2	KLK10,KLK11,KLK13,KLK6													ERK/MAPK Signaling	1.45	0.0354813	0.0279	-0.447	PPP1R7,PPP2R1A,PTPA,RALB,RAP2B,YWHAG	Circadian Rhythm Signaling	3.72
												MSP-RON Signaling Pathway	1.87	0.0134896	0.069	#NUM!	F11,KLK10,KLK13,KLK6							CNTF Signaling	1.8	0.0158489	0.0714	2	GRB2,RALA,RALB,RAP2B													Neutrophil Extracellular Trap Signaling Pathway	1.44	0.0363078	0.0227	3	C5,CD14,IGHA1,IGHG2,IGHG3,IGHM,IGLC7,JCHAIN,PRDX6	GM-CSF Signaling	3.71
												Unfolded protein response	1.86	0.0138038	0.0562	2	CALR,HSPA5,P4HB,PDIA6,VCP							Virus Entry via Endocytic Pathways	1.79	0.0162181	0.0513	#NUM!	B2M,DNM2,RAC1,RALA,RALB,RAP2B													Prostate Cancer Signaling	1.43	0.0371535	0.036	#NUM!	HSP90AA1,HSP90AB1,RALB,RAP2B	Fcγ Receptor-mediated Phagocytosis in Macrophages and Monocytes	3.71
												BMP signaling pathway	1.86	0.0138038	0.0562	2.236	BMP6,GRB2,RALA,RALB,RAP2B							PAK Signaling	1.79	0.0162181	0.0513	2.449	GRB2,MYL6,RAC1,RALA,RALB,RAP2B													Neuroprotective Role of THOP1 in Alzheimer's Disease	1.42	0.0380189	0.0357	#NUM!	AGT,C1R,SERPINA3,YWHAE	Melanoma Signaling	3.69
												Myelination Signaling Pathway	1.86	0.0138038	0.0344	2.111	ARHGAP1,BMP6,CALML5,FASN,FGFR4,GRB2,RAC1,RALA,RALB,RAP2B,RHOA							NGF Signaling	1.76	0.017378	0.0504	2.449	GRB2,RAC1,RALA,RALB,RAP2B,RHOA													Pathogen Induced Cytokine Storm Signaling Pathway	1.41	0.0389045	0.0235	2.828	C3,C5,CRP,CXCL12,FGA,FGB,FGG,IL1R2	Glioma Signaling	3.59
												GP6 Signaling Pathway	1.86	0.0138038	0.0488	2.449	CALML5,COL6A2,FGA,GRB2,RAC1,TLN1							PDGF Signaling	1.75	0.0177828	0.0575	1.342	ACP1,GRB2,RALA,RALB,RAP2B													Germ Cell-Sertoli Cell Junction Signaling	1.4	0.0398107	0.0301	#NUM!	A2M,ACTG1,CFL1,RALB,RAP2B	Superoxide Radicals Degradation	3.58
												PI3K/AKT Signaling	1.85	0.0141254	0.0404	2.121	GRB2,HSP90AA1,PPP2R1A,RALA,RALB,RAP2B,YWHAB,YWHAZ							Unfolded protein response	1.72	0.0190546	0.0562	2	CALR,HSPA5,P4HB,PDIA6,VCP													Amyotrophic Lateral Sclerosis Signaling	1.4	0.0398107	0.0351	-1	CAPN1,CAT,GPX1,SOD1	Oxytocin Signaling Pathway	3.54
												Acute Myeloid Leukemia Signaling	1.84	0.0144544	0.0556	2	GRB2,JUP,RALA,RALB,RAP2B							BMP signaling pathway	1.72	0.0190546	0.0562	2.236	BMP6,GRB2,RALA,RALB,RAP2B													Neuregulin Signaling	1.39	0.040738	0.0348	#NUM!	HSP90AA1,HSP90AB1,RALB,RAP2B	Formaldehyde Oxidation II (Glutathione-dependent)	3.53
												B Cell Receptor Signaling	1.82	0.0151356	0.0326	2.449	CALML5,GRB2,IGHA1,IGHV1-2,IGHV6-1,IGLV3-10,IGLV3-21,JCHAIN,RAC1,RALA,RALB,RAP2B							Adrenomedullin signaling pathway	1.71	0.0194984	0.0415	2.646	CALML5,GRB2,IL36A,NT5C,PDIA3,RALA,RALB,RAP2B													Agrin Interactions at Neuromuscular Junction	1.38	0.0416869	0.0441	#NUM!	ACTG1,RALB,RAP2B	Caveolar-mediated Endocytosis Signaling	3.53
												PI3K Signaling in B Lymphocytes	1.82	0.0151356	0.0338	2.449	CALML5,IGHA1,IGHV1-2,IGHV6-1,IGLV3-10,IGLV3-21,PDIA3,RAC1,RALA,RALB,RAP2B							Acute Myeloid Leukemia Signaling	1.7	0.0199526	0.0556	2	GRB2,JUP,RALA,RALB,RAP2B													Virus Entry via Endocytic Pathways	1.36	0.0436516	0.0342	#NUM!	ACTG1,DNM2,RALB,RAP2B	PPARα/RXRα Activation	3.48
												Ferroptosis Signaling Pathway	1.8	0.0158489	0.0472	0.816	GSS,HMOX1,HSPB1,RALA,RALB,RAP2B							Gap Junction Signaling	1.7	0.0199526	0.0412	#NUM!	GRB2,NT5C,PDIA3,RALA,RALB,RAP2B,TUBA1B,TUBB4B													Pentose Phosphate Pathway (Oxidative Branch)	1.35	0.0446684	0.25	#NUM!	PGD	Ethanol Degradation IV	3.48
												IL-2 Signaling	1.77	0.0169824	0.0645	2	GRB2,RALA,RALB,RAP2B							Glycogen Degradation III	1.69	0.0204174	0.154	#NUM!	MTAP,PGM2													Heme Degradation	1.35	0.0446684	0.25	#NUM!	BLVRB	Ovarian Cancer Signaling	3.44
												IL-8 Signaling	1.76	0.017378	0.0388	2.828	CSTB,HMOX1,IQGAP1,RAC1,RALA,RALB,RAP2B,RHOA							ILK Signaling	1.67	0.0213796	0.0408	0.816	ACTN1,ACTN4,DSP,MYL6,PPP2R1A,RAC1,RHOA,VCL													Heme Biosynthesis from Uroporphyrinogen-III I	1.35	0.0446684	0.25	#NUM!	UROD	Neurotrophin/TRK Signaling	3.42
												Glycogen Degradation III	1.76	0.017378	0.154	#NUM!	MTAP,PGM2							Oxytocin Signaling Pathway	1.67	0.0213796	0.0365	3.162	CALML5,EEF2,GRB2,HSPB1,MYL6,NT5C,RALA,RALB,RAP2B,RHOA													Arginine Degradation I (Arginase Pathway)	1.35	0.0446684	0.25	#NUM!	ARG1	CNTF Signaling	3.42
												CCR3 Signaling in Eosinophils	1.75	0.0177828	0.0462	2	CALML5,RAC1,RALA,RALB,RAP2B,RHOA							IL-2 Signaling	1.65	0.0223872	0.0645	2	GRB2,RALA,RALB,RAP2B													GM-CSF Signaling	1.35	0.0446684	0.0429	#NUM!	RACK1,RALB,RAP2B	IL-3 Signaling	3.39
												Thrombopoietin Signaling	1.75	0.0177828	0.0635	2	GRB2,RALA,RALB,RAP2B							Role of Macrophages, Fibroblasts and Endothelial Cells in Rheumatoid Arthritis	1.63	0.0234423	0.0346	#NUM!	CALML5,DKK3,IL36A,JCHAIN,PDIA3,RAC1,RALA,RALB,RAP2B,RHOA,SFRP1													Glioma Invasiveness Signaling	1.34	0.0457088	0.0423	#NUM!	PLAU,RALB,RAP2B	Endothelin-1 Signaling	3.38
												Glioblastoma Multiforme Signaling	1.74	0.018197	0.0417	2.646	GRB2,PDIA3,RAC1,RALA,RALB,RAP2B,RHOA							Ferroptosis Signaling Pathway	1.63	0.0234423	0.0472	0.816	GSS,HMOX1,HSPB1,RALA,RALB,RAP2B													RHOA Signaling	1.31	0.0489779	0.0328	1	ACTG1,ARHGAP1,CFL1,PFN1	HGF Signaling	3.36
												ERB2-ERBB3 Signaling	1.73	0.0186209	0.0625	2	GRB2,RALA,RALB,RAP2B							Thrombopoietin Signaling	1.63	0.0234423	0.0635	2	GRB2,RALA,RALB,RAP2B													Xenobiotic Metabolism PXR Signaling Pathway	1.31	0.0489779	0.0284	0.447	CAT,ESD,HSP90AA1,HSP90AB1,PPP1R7	Estrogen-Dependent Breast Cancer Signaling	3.35
												Role of IL-17A in Psoriasis	1.69	0.0204174	0.143	#NUM!	S100A7,S100A8							Role of IL-17A in Psoriasis	1.63	0.0234423	0.143	#NUM!	S100A7,S100A8													Senescence Pathway	1.31	0.0489779	0.0238	1.89	CALML5,CAPN1,CAT,PPP2R1A,PTPA,RALB,RAP2B	Telomerase Signaling	3.35
												ERBB4 Signaling	1.68	0.020893	0.0606	2	GRB2,RALA,RALB,RAP2B							ERB2-ERBB3 Signaling	1.6	0.0251189	0.0625	2	GRB2,RALA,RALB,RAP2B																			IGF-1 Signaling	3.35
												STAT3 Pathway	1.68	0.020893	0.0444	2.449	BMP6,FGFR4,RAC1,RALA,RALB,RAP2B							Phagosome Formation	1.6	0.0251189	0.0283	4.243	ADGRL3,ARPC1A,ARPC2,ARPC4,ARPC5,GPR180,GRB2,HMOX1,IGHA1,JCHAIN,MYL6,PRDX6,RAC1,RALA,RALB,RAP2B,RHOA,TLN1,VTN																			Inhibition of Matrix Metalloproteases	3.35
												Role of JAK1 and JAK3 in γc Cytokine Signaling	1.66	0.0218776	0.0597	#NUM!	GRB2,RALA,RALB,RAP2B							CCR3 Signaling in Eosinophils	1.59	0.025704	0.0462	2	CALML5,RAC1,RALA,RALB,RAP2B,RHOA																			Cancer Drug Resistance By Drug Efflux	3.34
												Phagosome Formation	1.66	0.0218776	0.0268	4.123	ARPC1A,ARPC2,ARPC4,ARPC5,GPR180,GRB2,HMOX1,IGHA1,JCHAIN,MYL6,PRDX6,RAC1,RALA,RALB,RAP2B,RHOA,TLN1,VTN							PI3K Signaling in B Lymphocytes	1.57	0.0269153	0.0338	2.449	CALML5,IGHA1,IGHV1-2,IGHV6-1,IGLV3-10,IGLV3-21,PDIA3,RAC1,RALA,RALB,RAP2B																			TCA Cycle II (Eukaryotic)	3.32
												Reelin Signaling in Neurons	1.64	0.0229087	0.0435	2.449	ARPC1A,ARPC2,ARPC4,ARPC5,RAC1,RHOA							Glioblastoma Multiforme Signaling	1.56	0.0275423	0.0417	2.646	GRB2,PDIA3,RAC1,RALA,RALB,RAP2B,RHOA																			Oxytocin In Brain Signaling Pathway	3.27
												Tight Junction Signaling	1.62	0.0239883	0.0393	#NUM!	CTNNA1,MYL6,PPP2R1A,RAC1,RHOA,VAPA,VCL							B Cell Receptor Signaling	1.56	0.0275423	0.0326	2.449	CALML5,GRB2,IGHA1,IGHV1-2,IGHV6-1,IGLV3-10,IGLV3-21,JCHAIN,RAC1,RALA,RALB,RAP2B																			Gap Junction Signaling	3.27
												Tumor Microenvironment Pathway	1.62	0.0239883	0.0393	2.646	CSPG4,LGALS9,PLAU,RAC1,RALA,RALB,RAP2B							IL-8 Signaling	1.56	0.0275423	0.0388	2.828	CSTB,HMOX1,IQGAP1,RAC1,RALA,RALB,RAP2B,RHOA																			Role of MAPK Signaling in Promoting the Pathogenesis of Influenza	3.21
												Thrombin Signaling	1.61	0.0245471	0.0364	2.449	GRB2,MYL6,PDIA3,RAC1,RALA,RALB,RAP2B,RHOA							ERBB4 Signaling	1.56	0.0275423	0.0606	2	GRB2,RALA,RALB,RAP2B																			LPS-stimulated MAPK Signaling	3.19
												Neutrophil Extracellular Trap Signaling Pathway	1.6	0.0251189	0.0303	2.309	ATP5F1A,ATP5F1B,COL6A2,GP1BA,IGHA1,JCHAIN,LTF,PDIA3,PRDX6,PYCARD,RAC1,SERPINB1							Role of JAK1 and JAK3 in γc Cytokine Signaling	1.54	0.0288403	0.0597	#NUM!	GRB2,RALA,RALB,RAP2B																			IL-2 Signaling	3.18
												Extrinsic Prothrombin Activation Pathway	1.58	0.0263027	0.125	#NUM!	F10,FGA							STAT3 Pathway	1.52	0.0301995	0.0444	2.449	BMP6,FGFR4,RAC1,RALA,RALB,RAP2B																			MSP-RON Signaling In Cancer Cells Pathway	3.18
												Coronavirus Replication Pathway	1.54	0.0288403	0.0714	#NUM!	COPZ1,TUBA1B,TUBB4B							Extrinsic Prothrombin Activation Pathway	1.51	0.030903	0.125	#NUM!	F10,FGA																			Thrombopoietin Signaling	3.14
												Aryl Hydrocarbon Receptor Signaling	1.52	0.0301995	0.0408	#NUM!	GSTM1,GSTM3,GSTO1,GSTP1,HSP90AA1,HSPB1							Role Of Osteoclasts In Rheumatoid Arthritis Signaling Pathway	1.5	0.0316228	0.0342	1.897	CALML5,COL6A2,CTNNA1,GRB2,RAC1,RALA,RALB,RAP2B,RHOA,SFRP1																			ERB2-ERBB3 Signaling	3.11
												FcγRIIB Signaling in B Lymphocytes	1.52	0.0301995	0.0331	2	GRB2,IGHA1,IGHV1-2,IGHV6-1,IGLV3-10,IGLV3-21,RALA,RALB,RAP2B							Reelin Signaling in Neurons	1.48	0.0331131	0.0435	2.449	ARPC1A,ARPC2,ARPC4,ARPC5,RAC1,RHOA																			L-carnitine Biosynthesis	3.06
												Endothelin-1 Signaling	1.51	0.030903	0.0372	2.449	GRB2,HMOX1,PDIA3,PRDX6,RALA,RALB,RAP2B							S-methyl-5'-thioadenosine Degradation II	1.46	0.0346737	0.5	#NUM!	MTAP																			D-glucuronate Degradation I	3.06
												GNRH Signaling	1.51	0.030903	0.0372	2.449	CALML5,GRB2,LHB,RAC1,RALA,RALB,RAP2B							Fatty Acid Biosynthesis Initiation II	1.46	0.0346737	0.5	#NUM!	FASN																			Inosine-5'-phosphate Biosynthesis II	3.06
												Role of MAPK Signaling in Promoting the Pathogenesis of Influenza	1.51	0.030903	0.0455	2	ATP6V1B2,PRDX6,RALA,RALB,RAP2B							Tight Junction Signaling	1.45	0.0354813	0.0393	#NUM!	CTNNA1,MYL6,PPP2R1A,RAC1,RHOA,VAPA,VCL																			Acute Myeloid Leukemia Signaling	3.05
												Role of Macrophages, Fibroblasts and Endothelial Cells in Rheumatoid Arthritis	1.5	0.0316228	0.0314	#NUM!	CALML5,DKK3,IL36A,JCHAIN,PDIA3,RAC1,RALA,RALB,RAP2B,RHOA							Tumor Microenvironment Pathway	1.45	0.0354813	0.0393	2.646	CSPG4,LGALS9,PLAU,RAC1,RALA,RALB,RAP2B																			ERBB4 Signaling	3.03
												Caveolar-mediated Endocytosis Signaling	1.5	0.0316228	0.0533	#NUM!	B2M,COPZ1,DNM2,RAB5B							Coronavirus Replication Pathway	1.44	0.0363078	0.0714	#NUM!	COPZ1,TUBA1B,TUBB4B																			Xenobiotic Metabolism PXR Signaling Pathway	3.03
												S-methyl-5'-thioadenosine Degradation II	1.5	0.0316228	0.5	#NUM!	MTAP							Thrombin Signaling	1.42	0.0380189	0.0364	2.449	GRB2,MYL6,PDIA3,RAC1,RALA,RALB,RAP2B,RHOA																			Role of JAK1 and JAK3 in γc Cytokine Signaling	3
												Fatty Acid Biosynthesis Initiation II	1.5	0.0316228	0.5	#NUM!	FASN							Antiproliferative Role of Somatostatin Receptor 2	1.4	0.0398107	0.0541	#NUM!	NT5C,RALA,RALB,RAP2B																			ERBB Signaling	2.96
												Oxytocin Signaling Pathway	1.5	0.0316228	0.0328	3	CALML5,EEF2,GRB2,HSPB1,MYL6,RALA,RALB,RAP2B,RHOA							Caveolar-mediated Endocytosis Signaling	1.39	0.040738	0.0533	#NUM!	B2M,COPZ1,DNM2,RAB5B																			Glucocorticoid Receptor Signaling	2.94
												Angiopoietin Signaling	1.48	0.0331131	0.0526	2	GRB2,RALA,RALB,RAP2B							Tryptophan Degradation X (Mammalian, via Tryptamine)	1.38	0.0416869	0.105	#NUM!	AKR1A1,AKR1B10																			Renin-Angiotensin Signaling	2.94
												PTEN Signaling	1.47	0.0338844	0.0397	-2.449	FGFR4,GRB2,RAC1,RALA,RALB,RAP2B							Methylglyoxal Degradation III	1.38	0.0416869	0.105	#NUM!	AKR1A1,AKR1B10																			Relaxin Signaling	2.92
												Regulation Of The Epithelial Mesenchymal Transition By Growth Factors Pathway	1.47	0.0338844	0.0365	1.89	FGFR4,GRB2,RAC1,RALA,RALB,RAP2B,RHOA							Role of MAPK Signaling in Promoting the Pathogenesis of Influenza	1.37	0.042658	0.0455	2	ATP6V1B2,PRDX6,RALA,RALB,RAP2B																			PTEN Signaling	2.92
												Natural Killer Cell Signaling	1.46	0.0346737	0.0363	1.89	B2M,GRB2,HSPA5,RAC1,RALA,RALB,RAP2B							Angiopoietin Signaling	1.37	0.042658	0.0526	2	GRB2,RALA,RALB,RAP2B																			Ethanol Degradation II	2.9
												Adrenomedullin signaling pathway	1.46	0.0346737	0.0363	2.646	CALML5,GRB2,IL36A,PDIA3,RALA,RALB,RAP2B							Aryl Hydrocarbon Receptor Signaling	1.37	0.042658	0.0408	#NUM!	GSTM1,GSTM3,GSTO1,GSTP1,HSP90AA1,HSPB1																			TGF-β Signaling	2.88
												CDK5 Signaling	1.45	0.0354813	0.0439	2.236	CAPN1,PPP2R1A,RALA,RALB,RAP2B							Neutrophil Extracellular Trap Signaling Pathway	1.36	0.0436516	0.0303	2.309	ATP5F1A,ATP5F1B,COL6A2,GP1BA,IGHA1,JCHAIN,LTF,PDIA3,PRDX6,PYCARD,RAC1,SERPINB1																			Pulmonary Fibrosis Idiopathic Signaling Pathway	2.85
												Neurotrophin/TRK Signaling	1.45	0.0354813	0.0513	2	GRB2,RALA,RALB,RAP2B							Endothelin-1 Signaling	1.34	0.0457088	0.0372	2.449	GRB2,HMOX1,PDIA3,PRDX6,RALA,RALB,RAP2B																			Melanocyte Development and Pigmentation Signaling	2.83
												Gap Junction Signaling	1.45	0.0354813	0.0361	#NUM!	GRB2,PDIA3,RALA,RALB,RAP2B,TUBA1B,TUBB4B							GNRH Signaling	1.34	0.0457088	0.0372	2.449	CALML5,GRB2,LHB,RAC1,RALA,RALB,RAP2B																			14-3-3-mediated Signaling	2.83
												Tryptophan Degradation X (Mammalian, via Tryptamine)	1.44	0.0363078	0.105	#NUM!	AKR1A1,AKR1B10							Neurotrophin/TRK Signaling	1.33	0.0467735	0.0513	2	GRB2,RALA,RALB,RAP2B																			Colanic Acid Building Blocks Biosynthesis	2.8
												Methylglyoxal Degradation III	1.44	0.0363078	0.105	#NUM!	AKR1A1,AKR1B10							Ephrin A Signaling	1.32	0.047863	0.0638	#NUM!	EPHA10,RAC1,RHOA																			Noradrenaline and Adrenaline Degradation	2.79
												Neuregulin Signaling	1.44	0.0363078	0.0435	2	GRB2,HSP90AA1,RALA,RALB,RAP2B							PTEN Signaling	1.32	0.047863	0.0397	-2.449	FGFR4,GRB2,RAC1,RALA,RALB,RAP2B																			ERK5 Signaling	2.77
												Human Embryonic Stem Cell Pluripotency	1.42	0.0380189	0.0355	2.646	BMP6,FGFR4,GRB2,HSP90AA1,RALA,RALB,RAP2B							FcγRIIB Signaling in B Lymphocytes	1.32	0.047863	0.0331	2	GRB2,IGHA1,IGHV1-2,IGHV6-1,IGLV3-10,IGLV3-21,RALA,RALB,RAP2B																			HER-2 Signaling in Breast Cancer	2.77
												Ephrin A Signaling	1.41	0.0389045	0.0638	#NUM!	EPHA10,RAC1,RHOA							CDK5 Signaling	1.32	0.047863	0.0439	2.236	CAPN1,PPP2R1A,RALA,RALB,RAP2B																			IL-6 Signaling	2.76
												FLT3 Signaling in Hematopoietic Progenitor Cells	1.4	0.0398107	0.0494	2	GRB2,RALA,RALB,RAP2B							Synaptic Long Term Depression	1.31	0.0489779	0.0366	1.342	NT5C,PDIA3,PPP2R1A,PRDX6,RALA,RALB,RAP2B																			Agranulocyte Adhesion and Diapedesis	2.73
												Role of MAPK Signaling in the Pathogenesis of Influenza	1.4	0.0398107	0.0494	#NUM!	PRDX6,RALA,RALB,RAP2B																															Regulation of the Epithelial-Mesenchymal Transition Pathway	2.73
												Fc Epsilon RI Signaling	1.4	0.0398107	0.0424	2.236	GRB2,RAC1,RALA,RALB,RAP2B																															Angiopoietin Signaling	2.71
												JAK/STAT Signaling	1.38	0.0416869	0.0488	2	GRB2,RALA,RALB,RAP2B																															Thyroid Cancer Signaling	2.69
												HMGB1 Signaling	1.38	0.0416869	0.0377	2.236	IL36A,RAC1,RALA,RALB,RAP2B,RHOA																															PPAR Signaling	2.68
												Sperm Motility	1.37	0.042658	0.0327	#NUM!	CALML5,DDR2,EPHB2,EPHB4,FGFR4,PDIA3,PRDX6,TWF1																															Gαq Signaling	2.67
												IL-15 Production	1.37	0.042658	0.0417	2.236	DDR2,EPHB2,EPHB4,FGFR4,TWF1																															NF-κB Activation by Viruses	2.66
												The Visual Cycle	1.36	0.0436516	0.0952	#NUM!	AKR1B10,RBP5																															Xenobiotic Metabolism AHR Signaling Pathway	2.63
												Endoplasmic Reticulum Stress Pathway	1.36	0.0436516	0.0952	#NUM!	CALR,HSPA5																															Fatty Acid α-oxidation	2.63
												Renin-Angiotensin Signaling	1.36	0.0436516	0.0413	2.236	GRB2,RAC1,RALA,RALB,RAP2B																															FLT3 Signaling in Hematopoietic Progenitor Cells	2.57
												Role Of Osteoclasts In Rheumatoid Arthritis Signaling Pathway	1.35	0.0446684	0.0308	2.333	CALML5,COL6A2,CTNNA1,GRB2,RAC1,RALA,RALB,RAP2B,RHOA																															Pyruvate Fermentation to Lactate	2.55
												VEGF Family Ligand-Receptor Interactions	1.35	0.0446684	0.0476	2	GRB2,RALA,RALB,RAP2B																															Superpathway of Serine and Glycine Biosynthesis I	2.55
												Melanoma Signaling	1.35	0.0446684	0.06	#NUM!	RALA,RALB,RAP2B																															Tyrosine Degradation I	2.55
												Amyloid Processing	1.35	0.0446684	0.06	#NUM!	CAPN1,CAPN2,CAPNS1																															Folate Polyglutamylation	2.55
												Cell Cycle: G2/M DNA Damage Checkpoint Regulation	1.35	0.0446684	0.06	#NUM!	SKP1,YWHAB,YWHAZ																															Putrescine Degradation III	2.55
												Role of NANOG in Mammalian Embryonic Stem Cell Pluripotency	1.34	0.0457088	0.041	2	BMP6,GRB2,RALA,RALB,RAP2B																															JAK/STAT Signaling	2.55
												Glioma Signaling	1.34	0.0457088	0.041	2.236	CALML5,GRB2,RALA,RALB,RAP2B																															Regulation of Actin-based Motility by Rho	2.54
												Senescence Pathway	1.34	0.0457088	0.0306	2.333	CALML5,CAPN1,CAPN2,CAPNS1,PPP2R1A,RALA,RALB,RAP2B,SOD2																															Xenobiotic Metabolism CAR Signaling Pathway	2.53
												LPS-stimulated MAPK Signaling	1.33	0.0467735	0.0471	2	RAC1,RALA,RALB,RAP2B																															Prostate Cancer Signaling	2.52
												HIPPO signaling	1.33	0.0467735	0.0471	#NUM!	PPP2R1A,SKP1,YWHAB,YWHAZ																															Granulocyte Adhesion and Diapedesis	2.5
												Diphthamide Biosynthesis	1.33	0.0467735	0.333	#NUM!	EEF2																															VEGF Family Ligand-Receptor Interactions	2.49
												Guanine and Guanosine Salvage I	1.33	0.0467735	0.333	#NUM!	HPRT1																															Airway Pathology in Chronic Obstructive Pulmonary Disease	2.48
												Glutathione Biosynthesis	1.33	0.0467735	0.333	#NUM!	GSS																															Aryl Hydrocarbon Receptor Signaling	2.41
												Palmitate Biosynthesis I (Animals)	1.33	0.0467735	0.333	#NUM!	FASN																															SPINK1 General Cancer Pathway	2.41
												Ascorbate Recycling (Cytosolic)	1.33	0.0467735	0.333	#NUM!	GSTO1																															Tryptophan Degradation X (Mammalian, via Tryptamine)	2.41
												D-glucuronate Degradation I	1.33	0.0467735	0.333	#NUM!	AKR1A1																															Urea Cycle	2.38
												Inosine-5'-phosphate Biosynthesis II	1.33	0.0467735	0.333	#NUM!	PAICS																															Pentose Phosphate Pathway (Non-oxidative Branch)	2.38
												Glutamate Degradation II	1.33	0.0467735	0.333	#NUM!	GOT2																															Fc Epsilon RI Signaling	2.37
												Tyrosine Biosynthesis IV	1.33	0.0467735	0.333	#NUM!	PCBD1																															BMP signaling pathway	2.37
												Aspartate Biosynthesis	1.33	0.0467735	0.333	#NUM!	GOT2																															Ceramide Signaling	2.32
												TCA Cycle II (Eukaryotic)	1.33	0.0467735	0.0909	#NUM!	CS,MDH2																															Necroptosis Signaling Pathway	2.31
												UVC-Induced MAPK Signaling	1.33	0.0467735	0.0588	#NUM!	RALA,RALB,RAP2B																															Non-Small Cell Lung Cancer Signaling	2.28
																																																Gαs Signaling	2.26
																																																Synaptic Long Term Depression	2.24
																																																Ceramide Degradation	2.24
																																																Glycogen Biosynthesis II (from UDP-D-Glucose)	2.24
																																																Prolactin Signaling	2.23
																																																IL-1 Signaling	2.21
																																																HMGB1 Signaling	2.21
																																																Adrenomedullin signaling pathway	2.21
																																																UVA-Induced MAPK Signaling	2.19
																																																Synaptic Long Term Potentiation	2.18
																																																ILK Signaling	2.17
																																																GABA Receptor Signaling	2.15
																																																nNOS Signaling in Neurons	2.14
																																																Sucrose Degradation V (Mammalian)	2.12
																																																Dopamine Degradation	2.11
																																																ID1 Signaling Pathway	2.11
																																																Wound Healing Signaling Pathway	2.09
																																																Androgen Signaling	2.08
																																																Mouse Embryonic Stem Cell Pluripotency	2.07
																																																STAT3 Pathway	2.06
																																																AMPK Signaling	2.05
																																																mTOR Signaling	2.04
																																																Myelination Signaling Pathway	2.02
																																																Sphingosine and Sphingosine-1-phosphate Metabolism	2.01
																																																Folate Transformations I	2.01
																																																Amyloid Processing	1.98
																																																EIF2 Signaling	1.95
																																																Regulation of eIF4 and p70S6K Signaling	1.95
																																																Mitochondrial Dysfunction	1.92
																																																NAD Phosphorylation and Dephosphorylation	1.92
																																																Pentose Phosphate Pathway	1.92
																																																GDP-glucose Biosynthesis	1.92
																																																ERK/MAPK Signaling	1.92
																																																IL-17 Signaling	1.91
																																																Role of MAPK Signaling in the Pathogenesis of Influenza	1.9
																																																Senescence Pathway	1.89
																																																Endocannabinoid Cancer Inhibition Pathway	1.89
																																																CDK5 Signaling	1.86
																																																LPS/IL-1 Mediated Inhibition of RXR Function	1.85
																																																Oxidative Ethanol Degradation III	1.84
																																																Glucose and Glucose-1-phosphate Degradation	1.84
																																																Purine Nucleotides De Novo Biosynthesis II	1.84
																																																SAPK/JNK Signaling	1.82
																																																Apelin Adipocyte Signaling Pathway	1.79
																																																Serotonin Degradation	1.79
																																																Melatonin Degradation III	1.77
																																																Glutamine Biosynthesis I	1.77
																																																Sorbitol Degradation I	1.77
																																																MSP-RON Signaling Pathway	1.76
																																																Natural Killer Cell Signaling	1.74
																																																Chronic Myeloid Leukemia Signaling	1.74
																																																Role of NANOG in Mammalian Embryonic Stem Cell Pluripotency	1.73
																																																RHOA Signaling	1.73
																																																S100 Family Signaling Pathway	1.72
																																																γ-glutamyl Cycle	1.7
																																																Guanosine Nucleotides Degradation III	1.7
																																																PI3K/AKT Signaling	1.68
																																																Role of Macrophages, Fibroblasts and Endothelial Cells in Rheumatoid Arthritis	1.66
																																																Phagosome Formation	1.64
																																																Phenylalanine Degradation IV (Mammalian, via Side Chain)	1.63
																																																Systemic Lupus Erythematosus In T Cell Signaling Pathway	1.62
																																																Glutamate Receptor Signaling	1.62
																																																Sirtuin Signaling Pathway	1.59
																																																Hepatic Fibrosis Signaling Pathway	1.58
																																																Superpathway of Citrulline Metabolism	1.58
																																																Leukotriene Biosynthesis	1.58
																																																FAK Signaling	1.55
																																																Multiple Sclerosis Signaling Pathway	1.54
																																																TEC Kinase Signaling	1.54
																																																G-Protein Coupled Receptor Signaling	1.54
																																																Insulin Receptor Signaling	1.53
																																																Xenobiotic Metabolism General Signaling Pathway	1.5
																																																UDP-D-xylose and UDP-D-glucuronate Biosynthesis	1.47
																																																S-methyl-5'-thioadenosine Degradation II	1.47
																																																Choline Degradation I	1.47
																																																Alanine Degradation III	1.47
																																																Alanine Biosynthesis II	1.47
																																																L-cysteine Degradation III	1.47
																																																Glycerol-3-phosphate Shuttle	1.47
																																																Glycine Biosynthesis I	1.47
																																																Tight Junction Signaling	1.47
																																																MicroRNA Biogenesis Signaling Pathway	1.41
																																																Cardiac Hypertrophy Signaling (Enhanced)	1.4
																																																Glutaryl-CoA Degradation	1.38
																																																Purine Nucleotides Degradation II (Aerobic)	1.38
																																																Endocannabinoid Neuronal Synapse Pathway	1.37
																																																Role of JAK family kinases in IL-6-type Cytokine Signaling	1.37
																																																IL-12 Signaling and Production in Macrophages	1.36
																																																Breast Cancer Regulation by Stathmin1	1.35
																																																Ephrin A Signaling	1.33
																																																Osteoarthritis Pathway	1.33
																																																IL-13 Signaling Pathway	1.32
																																																p70S6K Signaling	1.31
[truncated: 4 more columns]
