# Supplementary material for: Urinary proteome comparison in modified electroconvulsive therapy in depression disorder：new approach in the therapeutic mechanism
Source: Research Square preprint supplement (doi:10.21203/rs.3.rs-6664029/v1), 2025-05-23
Supplement: Supplementary file 5 [file e96806293db309d0cecd6619.xlsx]

## Sheet: Sheet1
Common differential proteins
Names	differential proteins enriched by number of patients		protein accession
1-adjust 11 13-adjust 15 17-adjust 3-adjust 5-adjust 9-adjust	8	3	Q07954
			P15586
			Q96PD5
1-adjust 11 13-adjust 15 3-adjust 5-adjust 9-adjust		1	O43451
1-adjust 11 13-adjust 17-adjust 3-adjust 5-adjust 9-adjust		2	P29279
			Q6UVK1
1-adjust 11 15 17-adjust 3-adjust 5-adjust 9-adjust		2	Q9UM47
			Q9NZT1
1-adjust 13-adjust 15 17-adjust 3-adjust 5-adjust 9-adjust	7	1	P25325
1-adjust 11 13-adjust 15 17-adjust 3-adjust 5-adjust		1	P16070
11 15 17-adjust 3-adjust 5-adjust 7 9-adjust		1	P50995
1-adjust 13-adjust 17-adjust 3-adjust 5-adjust 7	6	1	Q14118
1-adjust 11 17-adjust 3-adjust 5-adjust 9-adjust		7	Q12929
			P08195
			P13646
			Q03154
			P10451
			P30740
			P54802
1-adjust 13-adjust 15 3-adjust 5-adjust 9-adjust		1	P23468
1-adjust 13-adjust 17-adjust 3-adjust 5-adjust 9-adjust		2	P00734
			P15924
1-adjust 15 17-adjust 3-adjust 5-adjust 9-adjust		4	P06870
			P67936
			P28676
			Q9H3G5
1-adjust 11 13-adjust 15 3-adjust 5-adjust		1	Q8NFT8
1-adjust 11 13-adjust 17-adjust 3-adjust 5-adjust		1	P50895
1-adjust 11 15 17-adjust 3-adjust 5-adjust		3	P08185
			O75369
			Q9NPF0
1-adjust 13-adjust 15 17-adjust 3-adjust 5-adjust		1	P05067
1-adjust 11 17-adjust 3-adjust 7 9-adjust		2	Q8TF66
			Q8IV08
1-adjust 11 15 17-adjust 3-adjust 9-adjust		1	P13591
1-adjust 13-adjust 15 17-adjust 3-adjust 9-adjust		1	A6NI73
1-adjust 11 13-adjust 15 17-adjust 3-adjust		2	P01019
			P08294
1-adjust 11 13-adjust 15 17-adjust 9-adjust		1	P35858
15 17-adjust 3-adjust 5-adjust 7 9-adjust		2	P22891
			P10619
11 15 17-adjust 3-adjust 5-adjust 7		1	P15289
11 15 17-adjust 3-adjust 5-adjust 9-adjust		1	Q92673
11 13-adjust 15 17-adjust 3-adjust 5-adjust		1	Q16581
1-adjust 3-adjust 5-adjust 7 9-adjust		1	P55285
1-adjust 11 3-adjust 5-adjust 7		1	Q9H9H4
1-adjust 13-adjust 3-adjust 5-adjust 7		1	Q9NZH0
1-adjust 15 3-adjust 5-adjust 7		1	P07737
1-adjust 17-adjust 3-adjust 5-adjust 7		1	P14384
1-adjust 11 3-adjust 5-adjust 9-adjust		5	O75223
			P24530
			P04264
			P02790
			Q86SG5
1-adjust 13-adjust 3-adjust 5-adjust 9-adjust		1	P10599
1-adjust 15 3-adjust 5-adjust 9-adjust		3	Q13404
			Q9H6Y7
			P24821
1-adjust 17-adjust 3-adjust 5-adjust 9-adjust		10	P12821
			P27482
			P02538
			P07602
			Q86UN3
			Q6EMK4
			P15311
			P62805
			O15484
			P01040
1-adjust 11 17-adjust 3-adjust 5-adjust		4	P29992
			Q8NC42
			Q9Y279
			Q14508
1-adjust 13-adjust 15 3-adjust 5-adjust		1	P36896
1-adjust 13-adjust 17-adjust 3-adjust 5-adjust		1	Q6FHJ7
1-adjust 15 17-adjust 3-adjust 5-adjust		6	P11279
			Q6GTX8
			P63261
			P18669
			P0DMQ5
			P07738
1-adjust 17-adjust 3-adjust 7 9-adjust		2	P06280
			P16402
1-adjust 11 17-adjust 3-adjust 7		1	Q96P63
1-adjust 15 17-adjust 3-adjust 9-adjust		2	P00450
			O95865
1-adjust 11 13-adjust 15 3-adjust		1	Q9H0W9
1-adjust 11 15 17-adjust 3-adjust		1	P01011
1-adjust 11 17-adjust 7 9-adjust		1	P08758
1-adjust 15 17-adjust 7 9-adjust		1	O14818
1-adjust 11 13-adjust 17-adjust 9-adjust		1	P00352
13-adjust 3-adjust 5-adjust 7 9-adjust		1	P29218
15 3-adjust 5-adjust 7 9-adjust		1	Q9NU53
17-adjust 3-adjust 5-adjust 7 9-adjust		5	P22528
			P17655
			Q96IQ7
			Q13510
			Q01469
11 17-adjust 3-adjust 5-adjust 7		2	P22352
			P13284
11 13-adjust 3-adjust 5-adjust 9-adjust		1	Q02487
11 15 3-adjust 5-adjust 9-adjust		2	P19022
			P54826
11 17-adjust 3-adjust 5-adjust 9-adjust		5	P14923
			P05109
			P0DP23;P0DP24;P0DP25
			P13645
			P07108
13-adjust 15 3-adjust 5-adjust 9-adjust		2	Q12913
			P00749
13-adjust 17-adjust 3-adjust 5-adjust 9-adjust		1	O15197
15 17-adjust 3-adjust 5-adjust 9-adjust		10	Q99832
			Q96RM1
			Q9NQ38
			P13473
			P32119
			P09923
			P01591
			P07384
			P50570
			P69905
11 13-adjust 17-adjust 3-adjust 5-adjust		2	Q08380
			Q9H665
11 15 17-adjust 3-adjust 5-adjust		4	P26842
			Q16849
			Q8N114
			O95388
13-adjust 15 17-adjust 3-adjust 5-adjust		1	Q16851
15 17-adjust 3-adjust 7 9-adjust		1	P16278
11 13-adjust 17-adjust 3-adjust 9-adjust		1	P05451
11 15 17-adjust 3-adjust 9-adjust		1	P19652
13-adjust 15 17-adjust 7 9-adjust		1	P05787
1-adjust 3-adjust 5-adjust 7		4	P11684
			Q96AP7
			Q9BYE9
			P30086
1-adjust 3-adjust 5-adjust 9-adjust		7	P13647
			P61916
			Q8IUL8
			P02533
			P25815
			P40199
			P04745
1-adjust 11 3-adjust 5-adjust		6	Q14766
			O15230
			P12111
			Q9BYH1
			P20930
			Q13873
1-adjust 13-adjust 3-adjust 5-adjust		1	P35555
1-adjust 15 3-adjust 5-adjust		5	P02748
			Q99715
			Q9P0T7
			P62937
			P09603
1-adjust 17-adjust 3-adjust 5-adjust		10	P16112
			P55283
			O43633
			P04156
			P45880
			Q9GZX9
			P15144
			Q8TDQ0
			O60635
			P12429
1-adjust 3-adjust 7 9-adjust		1	P55287
1-adjust 13-adjust 3-adjust 9-adjust		1	P42785
1-adjust 15 3-adjust 9-adjust		2	O00187
			P10153
1-adjust 17-adjust 3-adjust 9-adjust		7	P07339
			O75368
			Q6P531
			Q02818
			P07911
			Q9UHL4
			P05546
1-adjust 11 17-adjust 3-adjust		1	O76076
1-adjust 13-adjust 17-adjust 3-adjust		1	Q5JS37
1-adjust 15 17-adjust 3-adjust		2	P06312
			P05156
1-adjust 11 7 9-adjust		2	O95372
			P60660
1-adjust 15 7 9-adjust		2	P0DOX5
			Q9HC38
1-adjust 17-adjust 7 9-adjust		2	P33908
			P17931
1-adjust 15 17-adjust 7		2	P00568
			P06753
1-adjust 11 17-adjust 9-adjust		2	Q9Y2S2
			P19440
1-adjust 13-adjust 17-adjust 9-adjust		2	Q9H6S3
			P14314
1-adjust 15 17-adjust 9-adjust		12	P28072
			P11117
			P01023
			O14950;P19105
			P14854
			P22392
			O75594
			P04040
			P29622
			O75503
			P02649
			P27797
1-adjust 11 15 17-adjust		3	P02787
			O00401
			Q9BRK3
1-adjust 13-adjust 15 17-adjust		1	Q9BRT3
3-adjust 5-adjust 7 9-adjust		1	P22223
15 3-adjust 5-adjust 7		2	P48304
			P0DJD8
17-adjust 3-adjust 5-adjust 7		5	P32320
			Q9UBX7
			O75084;Q14332
			O75144
			P15309
11 3-adjust 5-adjust 9-adjust		1	P07711
13-adjust 3-adjust 5-adjust 9-adjust		1	Q8NHP8
15 3-adjust 5-adjust 9-adjust		9	Q15517
			Q07960
			P46781
			P05556
			Q13361
			Q9NY15
			P22314
			P07203
			P63244
17-adjust 3-adjust 5-adjust 9-adjust		28	P0C0S5;Q71UI9
			P31151
			Q7Z5L0
			P35527
			Q96DA0
			Q09666
			P41271
			P05164
			Q92896
			Q8N307
			P29692
			P35221
			P05387
			Q9UNZ2
			P35754
			P32004
			P00492
			P30044
			Q08188
			P07858
			Q9UBV8
			P30050
			P63104
			P27487
			Q9UBC9
			Q96G03
			Q9ULI3
			Q92747
11 13-adjust 3-adjust 5-adjust		2	Q96ID5
			P21333
11 15 3-adjust 5-adjust		7	Q68CJ9
			P02452
			P28799
			Q8TCJ2
			Q16609
			O43586
			Q9NNX6
11 17-adjust 3-adjust 5-adjust		7	P08138
			P02749
			Q08334
			Q9NQ84
			P31997
			O60279
			P31431
13-adjust 17-adjust 3-adjust 5-adjust		1	P05023
15 17-adjust 3-adjust 5-adjust		15	P14780
			P05060
			P69891
			P05783
			P16152
			P49908
			P17858
			P49418
			O75487
			P05091
			Q8WWA0
			P31939
			Q14247
			Q9NY25
			Q04760
11 13-adjust 3-adjust 7		1	P39059
11 17-adjust 3-adjust 7		1	O00533
15 17-adjust 3-adjust 7		1	Q9H756
11 17-adjust 3-adjust 9-adjust		2	P04004
			P02763
13-adjust 17-adjust 3-adjust 9-adjust		1	P40925
15 17-adjust 3-adjust 9-adjust		6	Q14515
			P10253
			P00558
			P25788
			Q969T9
			P48061
11 17-adjust 7 9-adjust		3	Q9H159
			P34896
			Q02413
15 17-adjust 7 9-adjust		6	P22234
			P15907
			P13798
			P25786
			P26447
			P37837
11 15 17-adjust 9-adjust		1	Q16698
13-adjust 15 17-adjust 9-adjust		1	Q03167
1-adjust 3-adjust 5-adjust		11	P02751
			Q496F6
			P35237
			P15941
			P22105
			P05543
			Q06481
			P01701
			Q8N2S1
			P20916
			O75074
1-adjust 3-adjust 7		1	Q15113
1-adjust 3-adjust 9-adjust		3	Q12907
			Q14767
			O95336
1-adjust 11 3-adjust		2	Q9UQB8
			O75309
1-adjust 15 3-adjust		4	P08571
			P52758
			Q10588
			P27169
1-adjust 17-adjust 3-adjust		6	P28074
			P48594
			P19835
			Q9UBI6
			P23526
			Q9NY97
1-adjust 15 5-adjust		1	P01619
1-adjust 7 9-adjust		1	P08697
1-adjust 13-adjust 7		2	O95185
			Q9HCN6
1-adjust 15 7		3	P30046
			P01599
			P02750
1-adjust 17-adjust 7		4	P32754
			Q14894
			Q8NCC3
			P04180
1-adjust 11 9-adjust		1	Q14002
1-adjust 15 9-adjust		5	P13639
			Q14210
			P43121
			P30041
			P0C0L5
1-adjust 17-adjust 9-adjust		23	P16870
			P28070
			P50897
			P61586
			P0C7U0
			P11233
			Q86XT2
			P03951
			P59998
			P04179
			P17342
			Q96NY8
			P07237
			P07195
			P54819
			P46940
			Q9BY43
			O43155
			P29034
			Q3LXA3
			P24298
			P04080
			O00754
1-adjust 11 13-adjust		2	Q99519
			Q96DG6
1-adjust 11 15		1	P08238
1-adjust 11 17-adjust		5	P12931
			Q8WUM4
			P04066
			O00526
			Q07654
1-adjust 13-adjust 15		1	P14543
1-adjust 15 17-adjust		13	Q8IWU5
			P30626
			Q07507
			Q14624
			P02679
			P00915
			P19823
			Q9H4M9
			P01024
			P01009
			Q9GZM5
			P68871
			P00738
3-adjust 5-adjust 7		5	P55000
			P40189
			P07686
			P17900
			P24158
3-adjust 5-adjust 9-adjust		22	Q14315
			Q8WUT4
			Q92626
			P25705
			Q8TDQ1
			Q13332
			Q9Y2V2
			P09488
			Q9BYJ0
			P68363
			P13716
			P15880
			Q9BY67
			P57735
			O43866
			P02655
			O43291
			P02768
			P09211
			P01229
			P00995
			O95502
11 3-adjust 5-adjust		13	Q07020
			Q5KU26
			Q08722
			Q9UBX5
			Q14112
			P08174
			Q9Y3B3
			Q4LDE5
			Q8IWY4
			P01589
			Q9NP84
			P13671
			Q9UMX5
13-adjust 3-adjust 5-adjust		2	P0DOX2
			Q6UXB4
15 3-adjust 5-adjust		17	P25942
			P06734
			Q12864
			Q15746
			Q92743
			P08833
			Q4G0I0
			P20674
			P23471
			P01031
			Q86VB7
			P12259
			P16284
			Q8WWV6
			P09871
			Q9H1U4
			Q9NZ08
17-adjust 3-adjust 5-adjust		43	P35052
			Q92956
			Q96J84
			Q93088
			O95967
			P10643
			Q96DR8
			Q9NZU1
			Q86Y38
			P06454
			P62701
			Q53GD3
			Q9Y6Q6
			Q96TA1
			Q7Z5N4
			P06702
			O94910
			Q6UY14
			P10646
			Q8NFJ5
			P04746
			P98088
			Q13790
			Q8NBJ4
			Q9NZ53
			O43490
			P13611
			Q9NY72
			P25311
			Q6UX71
			P04233
			Q05707
			P21926
			Q06418
			P54753
			O75635
			Q92817
			O14594
			Q9HD89
			P05154
			O14907
			Q6UWI4
			Q14982
11 3-adjust 7		1	Q8WZ75
17-adjust 3-adjust 7		4	Q86TH1
			O00299
			Q969P0
			P24855
11 3-adjust 9-adjust		2	O60494
			Q03403
13-adjust 3-adjust 9-adjust		2	Q8WZ42
			P23470
15 3-adjust 9-adjust		1	P00441
17-adjust 3-adjust 9-adjust		11	P16401
			Q86YT9
			P06731
			P43652
			P54760
			P62993
			P80188
			Q02083
			Q8N3J6
			O00584
			Q15904
11 15 3-adjust		1	P24043
11 17-adjust 3-adjust		6	P46108
			Q13421
			Q01459
			P09237
			P12830
			Q9Y624
15 17-adjust 3-adjust		5	P11362
			Q96HD1
			P20810
			O75071
			P09382
11 7 9-adjust		1	P29323
13-adjust 7 9-adjust		1	P48637
15 7 9-adjust		1	Q9H0E2
17-adjust 7 9-adjust		10	P30040
			P00505
			P05026
			P61204;P84077
			Q9H444
			P28838
			P08572
			P14324
			P08582
			O00115
11 17-adjust 7		1	Q9UNN8
13-adjust 17-adjust 7		3	Q08174
			P46926
			O95154
15 17-adjust 7		3	P14174
			P50502
			P05413
11 15 9-adjust		2	P49368
			P06727
11 17-adjust 9-adjust		9	P04792
			Q6WKZ4
			Q07075
			P06703
			O95969
			Q9UBG3
			P31946
			Q9BSG0
			P09564
13-adjust 15 9-adjust		1	O94919
13-adjust 17-adjust 9-adjust		8	P40926
			Q6UX06
			Q6PCB0
			P17050
			Q13835
			P08473
			P78417
			P02788
15 17-adjust 9-adjust		28	Q06830
			Q969E1
			P43686
			P48668
			P55072
			P20827
			P50991
			Q86V85
			P60900
			O75340
			Q13200
			Q96IU4
			Q8IX04
			Q9UHG2
			O43681
			P40121
			P03950
			Q9UBP4
			P02766
			P30153
			O43598
			P60842
			P11234
			P20618
			P24666
			P04406
			P07900
			P50395
11 13-adjust 17-adjust		1	P00966
11 15 17-adjust		3	Q9NP85
			P11586
			Q13621
13-adjust 15 17-adjust		2	Q5FWE3
			P15151
1-adjust 3-adjust		4	Q9Y5Y7
			P00747
			P62263
			P34913
1-adjust 7		8	P01008
			Q86UD1
			P42330
			Q99969
			O94760
			A0A075B6J9
			P08236
			A0A0C4DH41;P01824;P01825;P06331;P0DP06;P0DP08
1-adjust 9-adjust		10	P06865
			P35558
			Q9UKU9
			Q8WVN6
			P04083
			P01133
			Q9Y5Y6
			A0A0B4J1U7
			O00462
			P19957
1-adjust 11		7	P12109
			P19961
			P01258
			P20711
			Q01151
			Q9UM22
			P43251
1-adjust 13-adjust		3	O00391
			P08637
			Q92820
1-adjust 15		10	P01768;P0DP03
			P04217
			Q92484
			P01782;P0DP04
			P01871
			Q9H6X2
			A0A0C4DH68
			A0A0B4J1V6
			P17987
			O75976
1-adjust 17-adjust		21	Q99816
			Q9UQN3
			P55268
			Q92520
			O00322
			O75351
			P12277
			Q6ISS4
			Q9HC84
			P00338
			P08183
			Q8NC51
			P16234
			P61970
			P63092;Q5JWF2
			P30039
			P05362
			Q8IWA5
			P60953
			O95747
			P49189
3-adjust 5-adjust		79	Q9Y6X5
			Q13449
			Q9BUJ0
			P10645
			P12273
			P02792
			P78504
			Q92563
			P20851
			O60939
			Q9UIK5
			Q9HAR2
			P04155
			P01130
			O95274
			Q9P121
			O00499
			P09619
			Q8NBS9
			P07996
			P23396
			P55145
			P63279
			Q13145
			P08246
			Q9BX67
			P19438
			P48745
			P39060
			P49747
			P14406
			P28908
			P14151
			Q13591
			O43790;Q14533
			Q92954
			P10586
			P22792
			P11047
			Q9H9P2
			Q6P4E1
			P20933
			Q6UXG3
			P26992
			O95497
			Q15116
			Q96GW7
			Q96S96
			P07942
			Q16363
			P00751
			O14917
			P13073
			Q8WXI7
			P04843
			P35318
			P19256
			O43653
			P15260
			P07307
			P22304
			Q13443
			Q99835
			O75955
			Q8NDA2
			P47895
			Q15043
			Q2UY09
			P61019
			P80370
			P36897
			Q9NQ36
			Q7Z3B1
			P23515
			O75752
			Q86YZ3
			Q9H4A4
			Q9NQS3
			A0A0A0MRZ8;P04433
3-adjust 7		2	O00468
			P19320
3-adjust 9-adjust		18	Q92876
			Q9UKZ9
			P78330
			O14498
			Q9BS26
			Q14974
			Q99536
			Q9H1E1
			P05062
			P51570
			Q9HBR0
			Q99584
			P35908
			Q15828
			Q9NRJ7;Q9UN66;Q9Y5F0
			P58546
			P08779
			P09668
11 3-adjust		5	Q16769
			P25940
			Q9H299
			P41222
			P55290
13-adjust 3-adjust		1	P13796
15 3-adjust		8	Q14254
			Q9UGM3
			Q9UBD6
			P36955
			P04216
			Q92542
			P78527
			P13688
17-adjust 3-adjust		16	Q02747
			P02760
			P01225
			O95633
			Q86Y78
			Q02246
			Q6UY11
			Q6KB66
			Q9UL52
			Q9Y2T3
			Q9NZZ3
			P54727
			Q92692
			Q6P9A2
			Q12860
			P36980
17-adjust 5-adjust		1	P51148
11 7		1	P05155
15 7		6	P0DOX7
			P0DOX8
			Q15293
			A0A0A0MS15
			A2NJV5
			P05090
17-adjust 7		10	Q08345
			P30530
			O43175
			P98095
			P68104
			O75882
			Q99650
			Q13477
			Q00796
			P45877
11 9-adjust		8	P61457
			Q8TCZ2
			Q9UKR3
			P02511
			P09467
			P09529
			Q7Z7M0
			Q99574
13-adjust 9-adjust		2	Q495M3
			Q86T13
15 9-adjust		31	P78371
			P01876
			P58499
			Q01518
			P23142
			P63208
			P02774
			P68036
			P61088
			Q15149
			P52209
			Q16827
			P13489
			P80748
			P62714;P67775
			P62760
			P23528
			P18428
			P24593
			Q9NR34
			Q96L46
			P02671
			O95450
			Q6P4A8
			P54578
			A0A075B6K4
			Q9NS93
			P00742
			P61225
			P00390
			Q96JF0
17-adjust 9-adjust		76	P01215
			Q99523
			P14778
			O75787
			P51580
			Q9HCY8
			O75390
			Q13126
			O43895
			Q9BW04
			Q5JZY3
			P27816
			P07476
			O96009
			Q9HB40
			O60235
			P13667
			O95833
			Q9Y5F6
			P31949
			P18124
			P00918
			P24534
			O14773
			P30613
			O15231
			P61020
			P06899;P23527;P33778;Q16778
			O75131
			O60701
			O00429
			P23284
			P35321
			O15144
			P49721
			P46976
			P09486
			P14618
			P28066
			Q9Y2E5
			P21128
			O43707
			Q16270
			P15848
			P63000
			O43505
			O60814;P57053;P58876;P62807;Q5QNW6;Q93079;Q99877;Q99879;Q99880
			Q13162
			P29508
			P18510
			P18065
			P02743
			Q5VW32
			O95171
			P21281
			P08727
			Q9P0L0
			P20340
			Q9Y6W3
			P20160
			P43490
			P51654
			P06576
			Q9ULZ3
			P51659
			P14550
			P25789
			O00204
			Q15907
			P32926
			P68431;P84243;Q16695;Q71DI3
			P07359
			P49720
			O43396
			Q9NZD2
			P38571
11 13-adjust		2	P12318
			P98172
11 15		3	Q6P587
			Q96FE7
			P53801
11 17-adjust		16	Q6UWP8
			O75891
			Q7Z7G0
			P01344
			P01111
			Q9BXN2
			P22748
			P17927
			P13598
			Q14697
			Q08554
			P51688
			P16066
			Q16378
			P11766
			P21709
13-adjust 15		1	Q6UXD5
13-adjust 17-adjust		9	Q16706
			Q14134
			Q9UBG0
			P34059
			P34096
			Q8NFU3
			P61224
			Q13557
			Q9BXP8
15 17-adjust		41	Q86VP6
			P21980
			P03952
			P29401
			P09758
			Q16531
			Q9NY33
			P22894
			P02461
			O43768
			Q93099
			Q14103
			P19971
			P07306
			P02675
			P05107
			O43157
			P11142
			P07225
			Q8WWZ8
			P05089
			P10768
			Q9BS40
			P21583
			P61981
			P06132
			P04075
			Q15257
			Q07699
			P17405
			Q9GZP4
			Q8N436
			P01860
			Q9HCM3
			P61978
			P62249
			Q9H3K6
			P04003
			Q9NRV9
			P30043
			P36405
1-adjust		30	Q8WVQ1
			P17174
			Q8NFZ8
			P04211
			Q7L266
			P19013
			Q8NCW5
			O95971
			Q9Y274
			P49773
			P07355
			Q5R3I4
			Q8N5I2
			Q969Z4
			O14556
			P21796
			Q15262
			P0DP57
			Q96C23
			Q9BQR3
			O95817
			P01042
			O95490
			P50053
			P20062
			Q8N386
			Q9H223
			Q9UBR2
			P09210
			P09936
3-adjust		25	P28332
			P04259
			Q03405
			P51606
			Q53RD9
			Q13228
			O94772
			P50452
			Q6IBS0
			P07204
			P35613
			P42702
			P11717
			Q6H9L7
			Q9NY47
			P53634
			P49913
			Q8TCT8
			Q7Z7D3
			Q14162
			Q9BZR6
			P16422
			P21757
			Q9Y4D7
			Q96D15
7		13	Q14126
			P30085
			P06396
			Q6UX73
			P47755
			Q9BTY2
			Q9BRA2
			Q9NQR4
			P48551
			Q8N3R9
			P78324
			P0DOX3
			Q8WW52
9-adjust		96	A0A075B6P5;P01615
			P30101
			O60218
			Q9Y6R7
			P58400;Q9ULB1
			P49327
			Q15365
			P16930
			P55017
			O43852
			Q86T26
			O15511
			Q9H008
			Q9P2B2
			Q14CN2
			P37802
			P11021
			P60981
			P23083
			P62310
			P36952
			P18206
			O75531
			O43399
			Q12792
			O43567
			P26641
			Q9UHA7
			P22004
			O00592
			P41217
			Q12866
			P52566
			Q9UJ70
			Q9Y5K6
			P30048
			Q9H6B4
			P21266
			P06748
			Q9BVM4
			Q9H190
			O14745
			P22735
			O15240
			Q03591
			Q24JP5
			Q16832
			Q13938
			Q9UN70
			P09601
			P82980
			P35268
			P55259
			P39656
			P61923
			O43240
			Q53FA7
			Q5SZK8
			Q96FQ6
			Q9UBX1
			Q9UIV8
			O96033
			Q14574
			P61769
			Q96HE7
			P52907
			Q9UKK9
			P12814
			Q96GP6
			O00182
			Q9BUT1
			Q15485
			P13797
			P83110
			P05452
			Q8N6Q3
			P55286
			O95834
			Q9BZZ2
			P33151
			Q9Y490
			Q92485
			Q9Y5Z4
			P08493
			Q02878
			P08729
			P04632
			P02545
			P20333
			Q9P1F3
			P22455
			A8K2U0
			Q15084
			P12110
			P68371
			Q08257
11		19	Q04721
			Q14165
			Q9ULV1
			O14732
			Q06278
			Q02388
			Q7Z4F1
			P42685
			O95460
			P01036
			P36957
			P14091
			Q10589
			P21810
			iRT_Peptides_Fusion;iRT-Kit_WR_fusion
			Q6E0U4
			A1E959
			Q6V0I7
			O15162
13-adjust		8	Q96PC5
			Q5IJ48
			Q6W4X9
			Q93091
			P99999
			P26927
			P49763
			Q8IZP9
15		47	P02656
			P00736
			P00748
			Q01082
			O60925
			P62258
			P02765
			P52823
			P01717
			P01700
			Q99497
			P46531
			Q9Y376
			P01859
			P14138
			P02795
			P01624
			A0A075B6I0
			P27930
			Q9NPG4
			Q9UGM5
			P00167
			A0A075B6K5
			P02741
			P02647
			O00233
			O14744
			Q96CF2
			P62820
			P02654
			P45974
			P01721
			O60911
			P04114
			A0A0B4J1V0
			P51884
			Q13057
			P02652
			P00491
			P48444
			P0DMV8;P0DMV9
			Q13201
			P01704
			Q9UM54
			A0M8Q6
			Q15435
			P27105
17-adjust		133	P22626
			P35241
			Q9H013
			P36222
			Q9NZP8
			P02042
			Q9H461
			Q16651
			Q9UJ99
			P61626
			Q8WV92
			O75094
			P49788
			P00533
			P16035
			O75874
			P36871
			Q8WVV5
			O75367
			O75608
			Q9UGB7
			Q8NEY4
			P15374
			Q99895
			Q9Y4C0
			Q7Z4W1
			P00746
			P25787
			P63096
			P07360
			P22607
			Q8TE68
			P10301
			Q96KP4
			Q92765
			P09417
			P10912
			P11171
			P0C0S8;P20671;Q16777;Q6FI13;Q96KK5;Q99878;Q9BTM1
			Q9H2M3
			Q8IYS5
			Q14393
			Q9UN37
			P20073
			P38606
			O75083
			P04070
			P09960
			P80303
			P08962
			P10909
			Q96JQ0
			O00622
			Q6YHK3
			P47756
			P09543
			Q5D862
			P08311
			Q8IZF2
			P19012
			Q8TAB3
			Q9BQ51
			Q13867
			Q09028;Q16576
			P54803
			Q16787
			P05204;Q15651
			Q9UEF7
			Q9NP79
			Q9H8L6
			P61604
			Q9UIB8
			P04899
			P19801
			O95861
			P17181
			P51858
			Q6XQN6
			Q9BUN1
			P01877
			Q9BYG5
			P27824
			P62879
			Q86VR7
			Q9UJU6
			Q9Y646
			A6NL88
			Q96FN5
			P35606
			Q8N271
			P08519
			O00560
			P81172
			O60888
			P31944
			Q9UK41
			Q9Y639
			Q06323
			O75936
			P19338
			P06744
			P35325
			P14784
			Q9UBQ6
			P53990
			P15104
			Q9UP38
			P62873
			Q9HBB8
			P21399
			Q9Y617
			P31689
			O75674
			Q9BRK5
			Q9NR99
			Q6P1N0
			P11597
			P41181
			O15400
			P04062
			O75363
			P59666
			P48643
			P17813
			P78380
			Q08830
			P21695
			P55327
			P62906
			P20774
			P49419
			Q5JRA6
			Q68D85
